# Supplementary material for: A neutrophil–B-cell axis impacts tissue damage control in a mouse model of intraabdominal bacterial infection via Cxcr4
Source: eLife. 2022 Sep 30;11:e78291. doi: 10.7554/eLife.78291 (PMC9525059; doi:10.7554/eLife.78291)
Supplement: Supplementary file 1. [file elife-78291-supp1.xlsx]

## Sheet: blood DEG
baseMean	log2FoldChange	lfcSE	stat	pvalue	padj	weight	gene_id	gene_version	gene_name	gene_biotype	gene_source	location
846175	-0.465175	0.998298	-0.465969				ENSMUSG00000075014	1	Gm10800	protein_coding	ensembl	chr2:98666547-98667301:-
238884	-0.412389	0.994617	-0.414621				ENSMUSG00000075015	3	Gm10801	protein_coding	ensembl	chr2:98662237-98664083:+
52019.7	-0.457619	0.965338	-0.474051				ENSMUSG00000095280	1	Gm21738	protein_coding	ensembl	chr14:19415857-19418930:-
50191.3	-0.448008	0.965966	-0.463793				ENSMUSG00000095891	7	Gm10717	protein_coding	ensembl	chr9:3025417-3033289:+
24108	-0.426604	0.961727	-0.443581				ENSMUSG00000095547	1	Gm10719	protein_coding	ensembl	chr9:3017408-3021593:+
23772.8	0.17365	1.05327	0.164867	0.869049	0.789858	7.14632	ENSMUSG00000056054	9	S100a8	protein_coding	ensembl_havana	chr3:90668978-90670035:+
22042	0.595628	1.11575	0.533836	0.593455	0.664044	7.14632	ENSMUSG00000056071	12	S100a9	protein_coding	ensembl_havana	chr3:90692632-90695721:-
19824	-0.487625	0.969392	-0.503022				ENSMUSG00000091028	1	Gm10722	protein_coding	ensembl	chr9:3000922-3002330:+
15634.2	-0.462505	0.961694	-0.480927				ENSMUSG00000095186	1	Gm10718	protein_coding	ensembl	chr9:3023547-3025218:+
7269.8	0.360688	1.08579	0.332188	0.739747	0.766648	6.51356	ENSMUSG00000049775	16	Tmsb4x	protein_coding	ensembl_havana	chrX:167207093-167209315:-
6759.65	1.27838	0.874379	1.46204	0.14373	0.311378	6.51356	ENSMUSG00000029580	14	Actb	protein_coding	ensembl_havana	chr5:142903115-142906754:-
6161.31	4.85619	1.74876	2.77694	0.00548738	0.04712	6.41147	ENSMUSG00000069919	7	Hba-a1	protein_coding	ensembl_havana	chr11:32283511-32284465:+
5578.45	-0.474649	0.968201	-0.490238				ENSMUSG00000074564	3	Gm10720	protein_coding	ensembl	chr9:3015654-3017210:+
5245.71	1.60735	1.66052	0.967975	0.333057	0.50533	6.51356	ENSMUSG00000069917	7	Hba-a2	protein_coding	ensembl_havana	chr11:32296489-32297298:+
4089.16	-0.41896	0.951609	-0.440265				ENSMUSG00000096385	7	Gm11168	protein_coding	ensembl	chr9:3003346-3006948:+
4048.3	3.85592	1.94577	1.9817				ENSMUSG00000052305	6	Hbb-bs	protein_coding	ensembl_havana	chr7:103826534-103828096:-
3446.98	0.488751	0.871501	0.560816	0.574923	0.710482	6.07075	ENSMUSG00000001025	8	S100a6	protein_coding	ensembl_havana	chr3:90612882-90624181:+
3303.61	-0.481584	0.956227	-0.50363				ENSMUSG00000096201	1	Gm10715	protein_coding	ensembl	chr9:3036877-3038316:+
3216.46	1.59765	0.999663	1.59819	0.11	0.267976	6.41147	ENSMUSG00000027398	13	Il1b	protein_coding	ensembl_havana	chr2:129364570-129371139:-
2834.88	1.81192	1.20091	1.50878	0.131354	0.299538	6.41147	ENSMUSG00000022651	5	Retnlg	protein_coding	ensembl	chr16:48872608-48874498:+
2755.3	0.687731	1.69656	0.405369	0.685206	0.737288	6.51356	ENSMUSG00000069792	5	Wfdc17	protein_coding	ensembl_havana	chr11:83703991-83706268:+
2403.01	2.31771	1.0434	2.2213	0.0263308	0.11973	6.07075	ENSMUSG00000019505	7	Ubb	protein_coding	ensembl_havana	chr11:62551171-62553213:+
2203.23	0.373306	1.05375	0.354265	0.72314	0.758805	6.51356	ENSMUSG00000036478	7	Btg1	protein_coding	ensembl	chr10:96617001-96622813:+
1982.27	3.57591	1.94881	1.83492				ENSMUSG00000073940	3	Hbb-bt	protein_coding	ensembl_havana	chr7:103812524-103813996:-
1865.66	-0.779894	1.17218	-0.665337	0.505835	0.635487	6.5981	ENSMUSG00000026395	16	Ptprc	protein_coding	ensembl_havana	chr1:138062861-138175708:-
1837.39	6.90113	1.32705	5.20034				ENSMUSG00000038357	10	Camp	protein_coding	ensembl_havana	chr9:109847379-109849617:-
1798.4	1.20444	1.10531	1.08969	0.275851	0.424029	7.14632	ENSMUSG00000018819	10	Lsp1	protein_coding	ensembl_havana	chr7:142460809-142494867:+
1778.4	4.81726	1.34262	3.58797				ENSMUSG00000026822	14	Lcn2	protein_coding	ensembl_havana	chr2:32384633-32388252:-
1768.05	0.123299	0.883884	0.139496	0.889058	0.86593	6.07075	ENSMUSG00000021998	16	Lcp1	protein_coding	ensembl_havana	chr14:75131101-75230842:+
1715.37	0.395269	0.937466	0.421635	0.673291	0.732485	6.51356	ENSMUSG00000059772	12	Slx1b	protein_coding	ensembl_havana	chr7:126689468-126695784:-
1679.57	0.111142	1.13042	0.0983198	0.921678	0.845093	6.5981	ENSMUSG00000009687	14	Fxyd5	protein_coding	ensembl_havana	chr7:31032722-31042481:-
1666.55	0.843187	1.20483	0.699837	0.484029	0.591601	7.14632	ENSMUSG00000031584	16	Gsr	protein_coding	ensembl_havana	chr8:33652523-33698163:+
1655.16	3.54748	1.54287	2.29927				ENSMUSG00000020255	8	D10Wsu102e	protein_coding	ensembl_havana	chr10:83360221-83488505:+
1654.95	1.66177	0.922805	1.80078	0.0717379	0.216011	6.07075	ENSMUSG00000075705	12	Msrb1	protein_coding	ensembl_havana	chr17:24736642-24742778:+
1640.26	1.25632	1.12958	1.1122	0.266052	0.439714	6.51356	ENSMUSG00000038612	16	Mcl1	protein_coding	ensembl_havana	chr3:95658788-95663176:+
1636.39	0.250512	1.05728	0.23694	0.812703	0.767152	7.14632	ENSMUSG00000000682	7	Cd52	protein_coding	ensembl_havana	chr4:134082448-134095082:-
1605.45	-2.55384	1.42633	-1.79049	0.0733746	0.208738	6.5981	ENSMUSG00000005087	17	Cd44	protein_coding	ensembl_havana	chr2:102811141-102901665:-
1605.14	-0.489328	1.12913	-0.433367	0.664748	0.730002	6.51356	ENSMUSG00000005800	3	Mmp8	protein_coding	ensembl_havana	chr9:7558456-7568485:+
1506.21	-1.10057	1.50569	-0.730937	0.464818	0.614802	6.41147	ENSMUSG00000006304	14	Arpc2	protein_coding	ensembl_havana	chr1:74236084-74268209:+
1489.77	1.57229	1.39499	1.1271	0.2597	0.433218	6.51356	ENSMUSG00000070493	3	Chchd2	protein_coding	ensembl_havana	chr5:129881156-129887470:-
1468.92	4.97452	1.49946	3.31753	0.000908166	0.0163844	6.51356	ENSMUSG00000030144	4	Clec4d	protein_coding	ensembl_havana	chr6:123262111-123275265:+
1462.59	8.16718	1.88413	4.33472				ENSMUSG00000037138	17	Aff3	protein_coding	ensembl_havana	chr1:38177326-38664955:-
1355.96	0.643153	1.32434	0.485639	0.627223	0.732485	6.07075	ENSMUSG00000026360	9	Rgs2	protein_coding	ensembl_havana	chr1:143999338-144004161:-
1343.76	-0.653805	0.959744	-0.681229				ENSMUSG00000096519	1	Gm10721	protein_coding	ensembl	chr9:3013140-3014344:+
1265.8	-0.589157	0.954783	-0.617058				ENSMUSG00000096736	1	Gm17535	protein_coding	ensembl	chr9:3034599-3035805:+
1255.86	1.06634	0.994116	1.07265	0.283428	0.461675	6.41147	ENSMUSG00000006333	14	Rps9	protein_coding	ensembl_havana	chr7:3703993-3706897:+
1254.91	-0.441227	1.74158	-0.253348	0.799999	0.799665	6.41147	ENSMUSG00000035530	13	Eif1	protein_coding	ensembl_havana	chr11:100319885-100322096:+
1244.43	-1.9976	1.65333	-1.20823				ENSMUSG00000041268	17	Dmxl2	protein_coding	ensembl_havana	chr9:54365158-54501626:-
1229.75	2.25077	1.41976	1.58531	0.112895	0.25838	7.14632	ENSMUSG00000000346	8	Dazap2	protein_coding	ensembl	chr15:100615628-100620731:+
1191.69	-9.65259	1.85098	-5.21485				ENSMUSG00000028954	11	Nub1	protein_coding	ensembl_havana	chr5:24685532-24710378:+
1179.92	1.17155	1.05772	1.10762	0.268027	0.441399	6.51356	ENSMUSG00000021281	15	Tnfaip2	protein_coding	ensembl_havana	chr12:111442469-111455018:+
1127.74	-0.742727	1.28109	-0.579762	0.562075	0.642075	7.14632	ENSMUSG00000030220	13	Arhgdib	protein_coding	ensembl_havana	chr6:136923655-136941899:-
1115.41	-3.19532	1.47776	-2.16227	0.0305977	0.128133	6.41147	ENSMUSG00000021360	15	Gcnt2	protein_coding	ensembl	chr13:40859768-40960891:+
1110.32	-5.54767	1.60534	-3.45576				ENSMUSG00000013663	7	Pten	protein_coding	ensembl_havana	chr19:32757497-32826160:+
1088.26	2.22246	1.23583	1.79835	0.072122	0.209784	6.41147	ENSMUSG00000055148	7	Klf2	protein_coding	ensembl_havana	chr8:72319033-72321656:+
1058.13	1.14497	1.3482	0.84926	0.395736	0.552883	6.5981	ENSMUSG00000025503	5	Taldo1	protein_coding	ensembl_havana	chr7:141392199-141402968:+
1043.01	-1.41828	1.16456	-1.21786	0.223277	0.411368	6.07075	ENSMUSG00000020077	14	Srgn	protein_coding	ensembl_havana	chr10:62493833-62527451:-
1034.9	3.59013	1.44889	2.47785				ENSMUSG00000025795	7	Rassf3	protein_coding	ensembl	chr10:121410350-121476250:-
1034.83	1.8616	1.24168	1.49927	0.133804	0.302738	6.41147	ENSMUSG00000060791	15	Gmfg	protein_coding	ensembl_havana	chr7:28437447-28448233:+
1007.38	2.57602	1.37169	1.87799				ENSMUSG00000026581	14	Sell	protein_coding	ensembl_havana	chr1:164061982-164084181:+
987.552	6.1867	1.86717	3.31342				ENSMUSG00000027520	15	Zdbf2	protein_coding	ensembl_havana	chr1:63273265-63314576:+
980.433	-3.66449	1.31807	-2.78018	0.00543285	0.0469887	6.41147	ENSMUSG00000018567	14	Gabarap	protein_coding	ensembl_havana	chr11:69991143-69994951:+
953.103	-4.4303	1.41805	-3.12423				ENSMUSG00000026180	8	Cxcr2	protein_coding	ensembl_havana	chr1:74153989-74161246:+
950.88	-0.0646563	0.989518	-0.0653412	0.947902	0.863777	6.51356	ENSMUSG00000062825	15	Actg1	protein_coding	ensembl_havana	chr11:120345690-120348542:-
934.699	1.03436	1.63082	0.634258	0.525912	0.6192	7.14632	ENSMUSG00000030579	10	Tyrobp	protein_coding	ensembl_havana	chr7:30413760-30417585:+
915.367	0.248325	1.08549	0.228768	0.819049	0.808335	6.41147	ENSMUSG00000022564	6	Grina	protein_coding	ensembl	chr15:76246807-76249904:+
914.804	-1.98316	1.50888	-1.31432				ENSMUSG00000028382	15	Ptbp3	protein_coding	ensembl_havana	chr4:59471868-59549364:-
911.744	-8.9377	1.96618	-4.54573				ENSMUSG00000024271	7	Elp2	protein_coding	ensembl	chr18:24603961-24638830:+
906.35	-6.83939	1.8346	-3.72801				ENSMUSG00000061455	13	Stx17	protein_coding	ensembl_havana	chr4:48124915-48186507:+
883.756	-3.93136	1.95613	-2.00976	0.0444562	0.159018	6.51356	ENSMUSG00000062901	2	Klhl24	protein_coding	ensembl	chr16:20097554-20127744:+
869.848	2.20225	1.62231	1.35748				ENSMUSG00000004665	10	Cnn2	protein_coding	ensembl_havana	chr10:79988584-79996062:+
860.803	3.36065	1.34357	2.50129	0.0123741	0.071008	7.14632	ENSMUSG00000052749	9	Trim30b	protein_coding	ensembl_havana	chr7:104355382-104369884:-
855.51	-1.74318	1.67507	-1.04066				ENSMUSG00000061983	6	Rps12	protein_coding	ensembl	chr10:23785211-23787195:-
844.099	7.72542	1.53462	5.0341	4.8009e-07	0.000234862	7.14632	ENSMUSG00000008682	13	Rpl10	protein_coding	ensembl_havana	chrX:74270812-74273135:+
842.309	8.058	1.87155	4.30552				ENSMUSG00000062169	13	Cnih4	protein_coding	ensembl_havana	chr1:181144693-181168994:+
838.942	1.15861	1.10842	1.04528	0.295894	0.466734	6.5981	ENSMUSG00000024190	6	Dusp1	protein_coding	ensembl_havana	chr17:26505590-26508519:-
833.65	7.83364	1.91766	4.08501				ENSMUSG00000062794	8	Zfp599	protein_coding	ensembl_havana	chr9:22247430-22259895:-
829.124	8.3657	1.90055	4.40173				ENSMUSG00000063888	6	Rpl7l1	protein_coding	ensembl	chr17:46773907-46782656:-
821.198	-2.42747	1.35385	-1.79302				ENSMUSG00000017002	14	Slpi	protein_coding	ensembl_havana	chr2:164354070-164389095:-
815.575	1.81309	1.13288	1.60042	0.109506	0.267976	6.41147	ENSMUSG00000030707	15	Coro1a	protein_coding	ensembl_havana	chr7:126699773-126707787:-
805.969	2.10171	1.35767	1.54803	0.121616	0.296316	6.07075	ENSMUSG00000025491	14	Ifitm1	protein_coding	ensembl_havana	chr7:140967221-140969825:+
805.646	8.01649	2.0711	3.87064				ENSMUSG00000026556	15	Vangl2	protein_coding	ensembl_havana	chr1:172000960-172028444:-
790.361	0.396353	1.19326	0.332159	0.73977	0.766648	6.51356	ENSMUSG00000063856	7	Gpx1	protein_coding	ensembl_havana	chr9:108338903-108340343:+
777.609	3.78442	1.45943	2.59308				ENSMUSG00000037902	18	Sirpa	protein_coding	ensembl_havana	chr2:129592835-129632228:+
777.471	9.18312	1.85778	4.94307	7.69016e-07	0.000250803	7.14632	ENSMUSG00000021607	8	Mrpl36	protein_coding	ensembl	chr13:73331009-73332175:+
773.701	4.97609	1.5379	3.23564	0.0012137	0.0191496	6.51356	ENSMUSG00000063882	12	Uqcrh	protein_coding	ensembl_havana	chr4:116066965-116075071:-
768.882	-6.72529	1.63014	-4.12559	3.6979e-05	0.00257584	6.07075	ENSMUSG00000042228	14	Lyn	protein_coding	ensembl_havana	chr4:3678115-3813122:+
768.28	2.60578	1.26692	2.05678	0.0397078	0.140762	7.14632	ENSMUSG00000035356	16	Nfkbiz	protein_coding	ensembl_havana	chr16:55811375-55838899:-
733	-1.88333	1.56539	-1.2031	0.228937	0.406623	6.41147	ENSMUSG00000025508	13	Rplp2	protein_coding	ensembl_havana	chr7:141447370-141451585:+
727.26	2.67325	1.73557	1.54027				ENSMUSG00000023932	8	Cdc5l	protein_coding	ensembl	chr17:45391892-45433707:-
724.326	3.14446	1.8045	1.74257	0.0814092	0.211276	7.14632	ENSMUSG00000090733	6	Rps27	protein_coding	ensembl_havana	chr3:90212522-90213651:-
722.394	7.14327	2.07966	3.43483				ENSMUSG00000028397	13	Kdm4c	protein_coding	ensembl_havana	chr4:74242497-74405860:+
721.887	8.03578	1.58752	5.06186	4.15193e-07	0.000234862	6.51356	ENSMUSG00000059456	13	Ptk2b	protein_coding	ensembl_havana	chr14:66153257-66281052:-
714.584	-0.55684	1.63127	-0.341354	0.732837	0.763754	6.51356	ENSMUSG00000035247	15	Hectd1	protein_coding	ensembl	chr12:51743722-51829536:-
709.922	-5.30478	1.86249	-2.84822				ENSMUSG00000059013	12	Sh2d3c	protein_coding	ensembl_havana	chr2:32721055-32755512:+
706.675	1.9997	1.3968	1.43164	0.152248	0.321083	6.51356	ENSMUSG00000008348	9	Ubc	protein_coding	ensembl_havana	chr5:125385965-125390202:-
703.816	0.49995	1.24129	0.402767	0.68712	0.713105	7.14632	ENSMUSG00000020101	14	Vsir	protein_coding	ensembl_havana	chr10:60346851-60372684:+
700.189	0.691218	1.48898	0.464222	0.642489	0.716192	6.5981	ENSMUSG00000023048	13	Prr13	protein_coding	ensembl_havana	chr15:102459028-102462806:+
697.856	7.38596	1.1627	6.35241	2.11974e-10	4.88284e-07	6.07075	ENSMUSG00000032496	7	Ltf	protein_coding	ensembl_havana	chr9:111019271-111042767:+
697.468	0.419275	1.01321	0.413809	0.679014	0.739755	6.41147	ENSMUSG00000035202	8	Lars2	protein_coding	ensembl_havana	chr9:123366927-123462666:+
692.892	-7.87534	1.61577	-4.87406				ENSMUSG00000031660	13	Brd7	protein_coding	ensembl_havana	chr8:88331039-88362194:-
685.392	1.96111	1.35781	1.44432	0.148649	0.328646	6.07075	ENSMUSG00000051748	2	Wfdc21	protein_coding	ensembl_havana	chr11:83746940-83752642:+
679.707	-5.82492	1.88583	-3.08878	0.00200981	0.0247651	6.5981	ENSMUSG00000018102	4	Hist1h2bc	protein_coding	ensembl_havana	chr13:23684199-23692488:+
677.692	0.472329	1.4655	0.322298	0.747227	0.77387	6.41147	ENSMUSG00000018927	3	Ccl6	protein_coding	ensembl_havana	chr11:83587882-83593087:-
676.846	-4.41925	1.79816	-2.45765				ENSMUSG00000070738	10	Dgkd	protein_coding	ensembl_havana	chr1:87853287-87945180:+
676.308	1.55428	1.23366	1.2599	0.207707	0.378842	6.5981	ENSMUSG00000026094	14	Stk17b	protein_coding	ensembl_havana	chr1:53755506-53785224:-
672.223	2.81443	1.39976	2.01065	0.0443621	0.158285	6.5981	ENSMUSG00000037926	15	Ssh2	protein_coding	ensembl_havana	chr11:77216287-77460220:+
670.647	-0.551866	1.56476	-0.352684	0.724325	0.753625	6.5981	ENSMUSG00000044768	16	D1Ertd622e	protein_coding	ensembl_havana	chr1:97606318-97662074:-
667.111	0.973111	1.12307	0.866471	0.386232	0.549506	6.51356	ENSMUSG00000072501	4	Phf20l1	protein_coding	ensembl	chr15:66577572-66645255:+
665.295	0.329852	1.43294	0.230193	0.817942	0.83038	6.07075	ENSMUSG00000056708	5	Ier5	protein_coding	ensembl_havana	chr1:155096361-155099636:-
663.528	1.08315	1.73298	0.625018				ENSMUSG00000025982	13	Sf3b1	protein_coding	ensembl_havana	chr1:54985169-55027481:-
660.066	7.52583	2.02439	3.71758				ENSMUSG00000043969	4	Emx2	protein_coding	ensembl_havana	chr19:59458372-59465357:+
651.97	1.33236	1.0371	1.2847	0.198896	0.38959	6.07075	ENSMUSG00000018501	17	Ncor1	protein_coding	ensembl_havana	chr11:62316426-62458541:-
646.446	0.995199	1.96494	0.506479	0.612521	0.674702	7.14632	ENSMUSG00000073412	6	Lst1	protein_coding	ensembl_havana	chr17:35185095-35188439:-
646.217	-4.1971	1.46029	-2.87415				ENSMUSG00000015143	14	Actn1	protein_coding	ensembl	chr12:80167542-80260371:-
644.176	2.2568	1.61913	1.39384	0.163367	0.343354	6.07075	ENSMUSG00000038147	13	Cd84	protein_coding	ensembl_havana	chr1:171839697-171890718:+
638.672	-0.784084	1.00173	-0.782728	0.433787	0.609936	6.07075	ENSMUSG00000058624	12	Gda	protein_coding	ensembl_havana	chr19:21391307-21473445:-
627.464	-4.60593	2.01227	-2.28892				ENSMUSG00000106918	3	Mrpl33	protein_coding	ensembl_havana	chr5:31596935-31664384:+
625.698	-9.178	1.94701	-4.7139				ENSMUSG00000039285	12	Azi2	protein_coding	ensembl_havana	chr9:118040499-118069794:+
625.581	-2.35167	1.9688	-1.19447				ENSMUSG00000036067	12	Slc2a6	protein_coding	ensembl_havana	chr2:27021363-27027998:-
620.137	-1.60005	1.53566	-1.04193	0.297445	0.468355	6.5981	ENSMUSG00000039001	12	Rps21	protein_coding	ensembl_havana	chr2:180257377-180258445:+
613.569	0.91501	1.52425	0.600302	0.548305	0.664044	6.5981	ENSMUSG00000027829	15	Ccnl1	protein_coding	ensembl_havana	chr3:65946151-65958249:-
613.467	-4.1002	1.99726	-2.05292				ENSMUSG00000037174	18	Elf2	protein_coding	ensembl_havana	chr3:51252720-51340663:-
612.781	8.82917	2.17745	4.05483				ENSMUSG00000023967	9	Mrps18a	protein_coding	ensembl_havana	chr17:46110986-46128910:+
608.414	3.80527	2.0519	1.85451				ENSMUSG00000022673	4	Mcm4	protein_coding	ensembl	chr16:15623897-15637400:-
604.793	5.80088	1.62969	3.55951	0.00037155	0.00995963	7.14632	ENSMUSG00000022500	14	Litaf	protein_coding	ensembl_havana	chr16:10959275-11066157:-
595.708	4.7809	1.0798	4.42758	9.5297e-06	0.00184435	6.07075	ENSMUSG00000032484	8	Ngp	protein_coding	ensembl_havana	chr9:110419747-110423012:+
594.384	-2.10905	2.07507	-1.01637				ENSMUSG00000074513	9	Arfip1	protein_coding	ensembl_havana	chr3:84496093-84582625:-
593.16	0.266633	1.12373	0.237274	0.812444	0.794231	6.5981	ENSMUSG00000069662	5	Marcks	protein_coding	ensembl_havana	chr10:37133375-37138920:-
592.888	-1.23306	1.50387	-0.819922	0.41226	0.569097	6.51356	ENSMUSG00000017707	9	Serinc3	protein_coding	ensembl_havana	chr2:163623272-163645131:-
587.337	-0.249664	1.03303	-0.241682	0.809027	0.796746	6.51356	ENSMUSG00000021250	13	Fos	protein_coding	ensembl_havana	chr12:85473890-85477273:+
585.841	-9.16138	1.79844	-5.09407				ENSMUSG00000030788	16	Rnf141	protein_coding	ensembl_havana	chr7:110800432-110844457:-
581.818	-6.56553	1.80237	-3.64272				ENSMUSG00000020130	8	Tbc1d15	protein_coding	ensembl	chr10:115197877-115251493:-
581.272	2.2194	1.74647	1.27079	0.203803	0.377521	6.51356	ENSMUSG00000007891	16	Ctsd	protein_coding	ensembl_havana	chr7:142375911-142388038:-
570.2	1.68169	1.13776	1.47807	0.13939	0.304314	6.5981	ENSMUSG00000008475	13	Arpc5	protein_coding	ensembl_havana	chr1:152766542-152775597:+
568.062	4.6531	2.01968	2.30388				ENSMUSG00000032849	13	Abcc4	protein_coding	ensembl	chr14:118482692-118706219:-
567.538	8.44897	2.07861	4.06472				ENSMUSG00000002844	8	Adprh	protein_coding	ensembl	chr16:38445399-38452689:-
567.421	2.99273	2.18258	1.37119				ENSMUSG00000024885	8	Aldh3b1	protein_coding	ensembl	chr19:3913493-3929761:-
565.156	3.96214	1.31106	3.02209				ENSMUSG00000060063	9	Alox5ap	protein_coding	ensembl_havana	chr5:149264767-149288153:+
559.618	2.58243	1.11425	2.31765	0.0204685	0.0933638	7.14632	ENSMUSG00000029004	15	Kmt2e	protein_coding	ensembl_havana	chr5:23434441-23504235:+
557.425	-0.0824138	1.17589	-0.0700865	0.944125	0.902881	6.07075	ENSMUSG00000038274	11	Fau	protein_coding	ensembl	chr19:6057888-6059524:+
555.48	7.39356	2.06053	3.58817				ENSMUSG00000037075	6	Rnf139	protein_coding	ensembl	chr15:58889229-58902390:+
552.595	7.60275	1.93441	3.93028				ENSMUSG00000038240	13	Pdss2	protein_coding	ensembl_havana	chr10:43221486-43464882:+
551.88	-3.62108	1.5548	-2.32897	0.0198609	0.0972372	6.41147	ENSMUSG00000024661	6	Fth1	protein_coding	ensembl	chr19:9982703-9985092:+
551.43	-0.107318	1.50476	-0.0713186	0.943144	0.868334	6.41147	ENSMUSG00000021025	7	Nfkbia	protein_coding	ensembl	chr12:55489411-55492647:-
543.001	-6.12233	1.42495	-4.29653	1.73491e-05	0.00204276	6.5981	ENSMUSG00000024006	16	Stk38	protein_coding	ensembl_havana	chr17:28970885-29007945:-
536.888	1.90567	1.1463	1.66245	0.0964217	0.252164	6.41147	ENSMUSG00000049313	8	Sorl1	protein_coding	ensembl_havana	chr9:41964720-42124297:-
535.663	-0.319416	1.2387	-0.257864	0.796511	0.792386	6.51356	ENSMUSG00000017737	2	Mmp9	protein_coding	ensembl_havana	chr2:164940780-164955850:+
534.711	-2.90825	1.41177	-2.06	0.0393982	0.146492	6.5981	ENSMUSG00000039753	16	Fbxl5	protein_coding	ensembl_havana	chr5:43744615-43821638:-
528.976	-2.21544	2.04556	-1.08305				ENSMUSG00000026126	15	Ptpn18	protein_coding	ensembl_havana	chr1:34459762-34475733:+
528.133	3.20317	2.01861	1.58682				ENSMUSG00000063193	8	Cd300lb	protein_coding	ensembl_havana	chr11:114922781-114934386:-
526.333	1.8621	1.77525	1.04892	0.294214	0.487221	6.07075	ENSMUSG00000033220	6	Rac2	protein_coding	ensembl	chr15:78559169-78572783:-
526.067	1.11405	1.47517	0.755205	0.450126	0.567879	7.14632	ENSMUSG00000028266	17	Lmo4	protein_coding	ensembl_havana	chr3:144188530-144205220:-
525.355	7.53214	2.04948	3.67515				ENSMUSG00000020873	13	Slc35b1	protein_coding	ensembl_havana	chr11:95384692-95391776:+
521.123	1.25702	1.6198	0.776036	0.437728	0.612209	6.07075	ENSMUSG00000026977	17	March7	protein_coding	ensembl_havana	chr2:60209887-60250676:+
518.288	2.41714	1.82401	1.32518				ENSMUSG00000022508	5	Bcl6	protein_coding	ensembl_havana	chr16:23965052-23988852:-
511.435	-0.445073	1.25991	-0.353257	0.723896	0.764341	6.41147	ENSMUSG00000030921	17	Trim30a	protein_coding	ensembl_havana	chr7:104409025-104465193:-
510.568	1.50579	1.29426	1.16344	0.244652	0.398913	7.14632	ENSMUSG00000031207	16	Msn	protein_coding	ensembl_havana	chrX:96096042-96168552:+
508.699	1.69727	1.39823	1.21387	0.224798	0.404542	6.41147	ENSMUSG00000062593	16	Lilrb4a	protein_coding	ensembl	chr10:51480679-51496613:+
507.802	6.33622	2.02065	3.13574				ENSMUSG00000021501	4	Caml	protein_coding	ensembl_havana	chr13:55623005-55632411:+
503.542	1.00629	2.23226	0.450794				ENSMUSG00000029823	16	Luc7l2	protein_coding	ensembl_havana	chr6:38551334-38609470:+
502.84	1.60109	1.39333	1.14911	0.250511	0.423348	6.51356	ENSMUSG00000016559	14	H3f3b	protein_coding	ensembl_havana	chr11:116021912-116027962:-
502.267	6.22148	1.87563	3.317				ENSMUSG00000041592	16	Sdk2	protein_coding	ensembl_havana	chr11:113776374-114067046:-
497.703	3.22257	2.04551	1.57544				ENSMUSG00000035697	14	Hmha1	protein_coding	ensembl_havana	chr10:80016653-80031472:+
496.782	1.41903	1.45952	0.972256	0.330923	0.525351	6.07075	ENSMUSG00000002897	5	Il17ra	protein_coding	ensembl_havana	chr6:120463247-120487559:+
492.432	-0.390857	1.03346	-0.378204	0.705279	0.72059	7.14632	ENSMUSG00000024858	13	Grk2	protein_coding	ensembl_havana	chr19:4286001-4306222:-
491.252	-3.85129	2.15475	-1.78735				ENSMUSG00000036046	14	5031439G07Rik	protein_coding	ensembl_havana	chr15:84943936-84988551:-
490.431	-0.227675	1.70988	-0.133153	0.894073	0.868717	6.07075	ENSMUSG00000038733	13	Wdr26	protein_coding	ensembl_havana	chr1:181173228-181211552:-
482.746	-0.650423	1.34681	-0.482936	0.629141	0.713897	6.51356	ENSMUSG00000022961	17	Son	protein_coding	ensembl_havana	chr16:91647506-91679221:+
477.001	0.487699	1.59086	0.306564	0.759175	0.770755	6.5981	ENSMUSG00000067235	14	H2-Q10	protein_coding	ensembl_havana	chr17:35470089-35474563:+
476.345	2.35938	1.24033	1.90222	0.0571424	0.184845	6.41147	ENSMUSG00000024608	10	Rps14	protein_coding	ensembl_havana	chr18:60774510-60778546:+
476.018	-1.09848	1.7889	-0.614051	0.539182	0.662986	6.51356	ENSMUSG00000055980	2	Irs1	protein_coding	ensembl_havana	chr1:82233101-82291416:-
471.237	2.24961	1.27603	1.76297	0.077906	0.218858	6.41147	ENSMUSG00000036918	15	Ttc7	protein_coding	ensembl_havana	chr17:87282886-87381769:+
470.646	0.585708	1.44279	0.405957	0.684775	0.764341	6.07075	ENSMUSG00000020120	15	Plek	protein_coding	ensembl_havana	chr11:16971206-17052381:-
469.198	8.01071	1.97183	4.06257				ENSMUSG00000038047	18	Haus6	protein_coding	ensembl_havana	chr4:86578855-86612055:-
465.532	0.752992	1.54058	0.48877	0.625004	0.679438	7.14632	ENSMUSG00000072620	3	Slfn2	protein_coding	ensembl_havana	chr11:83065112-83070678:+
462.59	0.645817	1.91988	0.336383	0.736582	0.732394	7.14632	ENSMUSG00000021457	14	Syk	protein_coding	ensembl_havana	chr13:52583173-52648792:+
462.258	-1.29008	1.98943	-0.648465				ENSMUSG00000032570	17	Atp2c1	protein_coding	ensembl_havana	chr9:105403539-105527319:-
460.889	3.26239	1.23034	2.65162	0.00801067	0.06213	6.07075	ENSMUSG00000090841	1	Myl6	protein_coding	ensembl	chr10:128490860-128493875:-
460.604	5.63823	1.7904	3.14915				ENSMUSG00000048173	4	Olfr1324	protein_coding	havana	chrX:50420998-50428498:-
458.546	2.99776	1.56556	1.91481	0.0555167	0.188063	6.07075	ENSMUSG00000010608	15	Rbm25	protein_coding	ensembl_havana	chr12:83631236-83683123:+
455.222	3.58179	1.34227	2.66847	0.00761985	0.054024	7.14632	ENSMUSG00000041235	11	Chd7	protein_coding	ensembl_havana	chr4:8690406-8867659:+
453.326	-1.38748	1.49215	-0.929855	0.352446	0.526864	6.41147	ENSMUSG00000004880	11	Lbr	protein_coding	ensembl_havana	chr1:181815335-181843046:-
450.177	1.67242	2.07337	0.806618				ENSMUSG00000019873	7	Reep3	protein_coding	ensembl	chr10:67009189-67096988:-
446.108	-1.54662	1.83224	-0.844115				ENSMUSG00000034928	16	Rnf44	protein_coding	ensembl_havana	chr13:54679399-54693907:-
445.941	-1.39881	1.80964	-0.772977				ENSMUSG00000025804	5	Ccr1	protein_coding	ensembl_havana	chr9:123962124-123968692:-
445.588	0.466501	1.43278	0.325591	0.744734	0.735115	7.14632	ENSMUSG00000021094	9	Dhrs7	protein_coding	ensembl	chr12:72650356-72664828:-
443.778	0.719155	1.55897	0.461302	0.644582	0.724383	6.41147	ENSMUSG00000025283	15	Sat1	protein_coding	ensembl_havana	chrX:155213132-155216449:-
443.012	-0.929946	1.60108	-0.580826	0.561358	0.642075	7.14632	ENSMUSG00000028525	16	Pde4b	protein_coding	ensembl_havana	chr4:102087543-102607259:+
438.004	1.62896	1.44595	1.12656	0.259927	0.438456	6.41147	ENSMUSG00000028961	15	Pgd	protein_coding	ensembl_havana	chr4:149149991-149166771:-
437.631	6.88863	2.06067	3.34291				ENSMUSG00000058799	14	Nap1l1	protein_coding	ensembl	chr10:111473192-111498142:+
437.196	-2.00644	1.66285	-1.20663				ENSMUSG00000032231	14	Anxa2	protein_coding	ensembl_havana	chr9:69453620-69491795:+
430.822	6.21497	1.89334	3.28255				ENSMUSG00000020661	15	Dnmt3a	protein_coding	ensembl_havana	chr12:3806007-3914443:+
428.802	-0.174415	1.2144	-0.143623	0.885798	0.829589	6.5981	ENSMUSG00000030830	18	Itgal	protein_coding	ensembl_havana	chr7:127296260-127335138:+
426.791	-0.113377	1.35033	-0.0839624	0.933086	0.815851	7.14632	ENSMUSG00000000204	16	Slfn4	protein_coding	ensembl_havana	chr11:83175186-83190216:+
426.305	3.85147	1.96266	1.96237				ENSMUSG00000073530	11	Pappa2	protein_coding	ensembl_havana	chr1:158711727-158980490:-
425.488	-6.4549	1.96943	-3.27755				ENSMUSG00000027858	13	Tspan2	protein_coding	ensembl_havana	chr3:102734529-102801513:+
425.243	0.0759033	1.58624	0.047851	0.961835	0.829954	7.14632	ENSMUSG00000003484	4	Cyp4f18	protein_coding	ensembl_havana	chr8:71988482-72009626:-
424.709	6.52923	1.86258	3.50548				ENSMUSG00000020623	11	Map2k6	protein_coding	ensembl_havana	chr11:110399122-110525522:+
423.158	-1.10554	2.02656	-0.545527				ENSMUSG00000026918	16	Brd3	protein_coding	ensembl_havana	chr2:27445579-27507662:-
422.876	-1.39709	2.24131	-0.623337				ENSMUSG00000020250	9	Txnrd1	protein_coding	ensembl	chr10:82859206-82897724:+
420.788	-0.875062	1.19249	-0.733808	0.463066	0.576787	7.14632	ENSMUSG00000029561	17	Oasl2	protein_coding	ensembl_havana	chr5:114896936-114912234:+
420.238	2.54134	1.52888	1.66222	0.0964684	0.247978	6.5981	ENSMUSG00000001289	12	Pfdn5	protein_coding	ensembl_havana	chr15:102326116-102331873:+
416.927	-6.66995	1.79161	-3.72289				ENSMUSG00000066258	13	Trim12a	protein_coding	ensembl_havana	chr7:104299894-104315466:-
413.448	0.983558	1.3013	0.755827	0.449753	0.604603	6.41147	ENSMUSG00000035781	13	R3hdm4	protein_coding	ensembl	chr10:79910053-79917006:-
412.617	4.72451	1.71142	2.76058				ENSMUSG00000059498	13	Fcgr3	protein_coding	ensembl_havana	chr1:171051174-171064935:-
412.187	-3.16968	1.76242	-1.79848				ENSMUSG00000058715	11	Fcer1g	protein_coding	ensembl_havana	chr1:171229572-171234365:-
410.963	4.49302	2.00637	2.23938				ENSMUSG00000025959	13	Klf7	protein_coding	ensembl_havana	chr1:64029447-64122282:-
410.837	-0.111572	1.44376	-0.0772784	0.938402	0.899174	6.07075	ENSMUSG00000027506	15	Tpd52	protein_coding	ensembl_havana	chr3:8925593-9004723:-
408.952	1.59997	1.37634	1.16249	0.245038	0.398913	7.14632	ENSMUSG00000034868	8	Myl12b	protein_coding	ensembl_havana	chr17:70973920-70990787:-
406.708	-3.30519	1.80792	-1.82817	0.0675238	0.201245	6.5981	ENSMUSG00000036913	15	Trim67	protein_coding	ensembl_havana	chr8:124793092-124834713:+
406.683	-2.57187	1.69315	-1.51899				ENSMUSG00000028249	15	Sdcbp	protein_coding	ensembl_havana	chr4:6365650-6408423:+
403.494	0.956414	1.2926	0.739914	0.459352	0.574223	7.14632	ENSMUSG00000053560	4	Ier2	protein_coding	ensembl	chr8:84661331-84662852:-
399.513	2.59414	1.99306	1.30159				ENSMUSG00000019362	8	D8Ertd738e	protein_coding	ensembl_havana	chr8:84246238-84249719:-
399.483	-0.274807	1.54761	-0.177568	0.859062	0.849294	6.07075	ENSMUSG00000048118	17	Arid4a	protein_coding	ensembl_havana	chr12:71015990-71098592:+
398.029	4.337	1.68518	2.57362	0.010064	0.0663941	6.51356	ENSMUSG00000026655	14	Fam107b	protein_coding	ensembl_havana	chr2:3613758-3782142:+
397.468	2.329	1.70563	1.36548				ENSMUSG00000057637	13	Prdm2	protein_coding	ensembl_havana	chr4:143107391-143212995:-
394.472	-0.392202	1.8491	-0.212104	0.832026	0.813777	6.41147	ENSMUSG00000013974	3	Mcemp1	protein_coding	ensembl_havana	chr8:3665754-3669259:+
393.985	1.56691	1.91581	0.817885	0.413423	0.540661	7.14632	ENSMUSG00000049339	16	Fam134a	protein_coding	ensembl_havana	chr1:75142778-75147913:+
393.352	3.48574	1.63184	2.13608				ENSMUSG00000036707	16	Cab39	protein_coding	ensembl_havana	chr1:85793441-85851576:+
392.461	0.542278	1.76989	0.306391				ENSMUSG00000034647	14	Ankrd12	protein_coding	ensembl_havana	chr17:65967501-66077089:-
392.301	0.00813023	1.85792	0.00437599	0.996508	0.845093	7.14632	ENSMUSG00000054405	14	Dnajc8	protein_coding	ensembl_havana	chr4:132535550-132553742:+
392.035	9.53633	2.18079	4.37288				ENSMUSG00000015013	9	Trappc2l	protein_coding	ensembl_havana	chr8:122611640-122616660:+
391.773	-8.25088	2.32238	-3.55277				ENSMUSG00000029401	8	Rilpl2	protein_coding	ensembl_havana	chr5:124463265-124478366:-
389.077	6.92011	2.02582	3.41595				ENSMUSG00000020061	17	Mybpc1	protein_coding	ensembl_havana	chr10:88518279-88605152:-
382.148	-2.99485	1.7185	-1.74271	0.081384	0.211276	7.14632	ENSMUSG00000019961	17	Tmpo	protein_coding	ensembl_havana	chr10:91147571-91181315:-
380.629	-9.43017	2.33704	-4.03509				ENSMUSG00000033760	16	Rbm4b	protein_coding	ensembl_havana	chr19:4756543-4767065:+
380.286	4.31807	2.52581	1.70958				ENSMUSG00000073923	3	Olfr657	protein_coding	ensembl_havana	chr7:104624794-104637481:+
379.246	1.1027	0.938507	1.17495	0.240014	0.409853	6.5981	ENSMUSG00000032712	16	2810474O19Rik	protein_coding	ensembl_havana	chr6:149309414-149335663:+
378.227	2.16847	1.15612	1.87564	0.0607046	0.192266	6.41147	ENSMUSG00000019943	9	Atp2b1	protein_coding	ensembl	chr10:98915152-99026143:+
377.929	0.0215203	1.39197	0.0154603	0.987665	0.89683	6.41147	ENSMUSG00000022108	7	Itm2b	protein_coding	ensembl	chr14:73362231-73385271:-
377.324	2.24003	1.56353	1.43268	0.15195	0.320989	6.51356	ENSMUSG00000022141	6	Nipbl	protein_coding	ensembl	chr15:8291225-8444463:-
376.161	1.64406	0.971655	1.69202	0.0906425	0.238347	6.5981	ENSMUSG00000050621	7	Rps27rt	protein_coding	ensembl_havana	chr9:114982366-114982739:-
373.307	7.17634	1.86203	3.85405				ENSMUSG00000026102	9	Inpp1	protein_coding	ensembl_havana	chr1:52785427-52817688:-
372.134	1.28501	1.61307	0.796625	0.425669	0.575298	6.5981	ENSMUSG00000038679	16	Trps1	protein_coding	ensembl_havana	chr15:50654752-50890463:-
371	6.10342	1.70318	3.58355				ENSMUSG00000005534	10	Insr	protein_coding	ensembl_havana	chr8:3122061-3279617:-
363.748	0.126998	1.37096	0.0926345	0.926194	0.890068	6.07075	ENSMUSG00000095041	7	AC149090.1	protein_coding	ensembl	chrUn_JH584304:52190-59690:-
363.058	-1.63805	1.23755	-1.32363	0.185627	0.35284	6.5981	ENSMUSG00000036533	8	Cdc42ep3	protein_coding	ensembl	chr17:79334025-79355091:-
363.003	-2.42889	1.84993	-1.31296				ENSMUSG00000021969	7	Zdhhc20	protein_coding	ensembl	chr14:57832702-57890262:-
362.646	1.00733	1.33169	0.756427	0.449393	0.567879	7.14632	ENSMUSG00000042265	13	Trem1	protein_coding	ensembl_havana	chr17:48232768-48246924:+
362.512	3.02653	1.85089	1.63517				ENSMUSG00000031799	9	Tpm4	protein_coding	ensembl_havana	chr8:72134975-72153142:+
360.427	-0.279435	1.39799	-0.199884	0.841572	0.778161	7.14632	ENSMUSG00000029622	16	Arpc1b	protein_coding	ensembl_havana	chr5:145114215-145130705:+
359.801	-0.00736027	1.60253	-0.00459292	0.996335	0.891665	6.51356	ENSMUSG00000021728	7	Emb	protein_coding	ensembl_havana	chr13:117220625-117274098:+
359.217	11.0391	2.37318	4.65163				ENSMUSG00000073995	2	Gm10604	protein_coding	ensembl	chr4:11979560-11981265:-
354.112	7.57044	1.80686	4.18983	2.79158e-05	0.00257238	6.5981	ENSMUSG00000035277	15	Arx	protein_coding	ensembl_havana	chrX:93286445-93298357:+
352.669	6.27043	1.77704	3.52858	0.000417801	0.0113997	6.07075	ENSMUSG00000056091	12	St3gal5	protein_coding	ensembl_havana	chr6:72097592-72154571:+
349.987	5.3576	1.95523	2.74014				ENSMUSG00000042719	17	Naa25	protein_coding	ensembl_havana	chr5:121397936-121444378:+
349.913	-1.87036	1.29503	-1.44427	0.148664	0.328646	6.07075	ENSMUSG00000032841	15	Prr5l	protein_coding	ensembl_havana	chr2:101714285-101883027:-
349.256	7.73274	2.31572	3.33923				ENSMUSG00000021636	14	Marveld2	protein_coding	ensembl	chr13:100595957-100616971:-
348.934	3.71986	2.14854	1.73134				ENSMUSG00000029787	10	Avl9	protein_coding	ensembl_havana	chr6:56714899-56761912:+
347.192	6.45869	1.91196	3.37804				ENSMUSG00000024659	14	Anxa1	protein_coding	ensembl_havana	chr19:20373428-20390944:-
344.809	0.859937	1.37683	0.624579				ENSMUSG00000022148	15	Fyb	protein_coding	ensembl_havana	chr15:6579871-6663313:+
342.557	6.04751	2.10478	2.87323				ENSMUSG00000022635	9	Zcrb1	protein_coding	ensembl_havana	chr15:93386097-93398334:-
341.903	8.49585	2.09467	4.05593				ENSMUSG00000029208	16	Guf1	protein_coding	ensembl_havana	chr5:69556923-69575973:+
341.177	4.27733	1.20531	3.54875	0.000387067	0.0100989	7.14632	ENSMUSG00000071637	5	Cebpd	protein_coding	havana	chr16:15887286-15891031:+
340.539	5.37422	1.60116	3.35645	0.000789512	0.015134	6.51356	ENSMUSG00000019852	7	Arfgef3	protein_coding	ensembl_havana	chr10:18581839-18743949:-
338.703	-3.61255	2.07742	-1.73896				ENSMUSG00000041754	5	Trem3	protein_coding	ensembl	chr17:48247777-48258841:+
338.016	5.77096	1.80045	3.20528				ENSMUSG00000021991	8	Cacna2d3	protein_coding	ensembl_havana	chr14:28904943-29721864:-
337.622	0.78438	1.81137	0.433031	0.664992	0.7329	6.41147	ENSMUSG00000023977	14	Ubr2	protein_coding	ensembl	chr17:46928292-47010532:-
333.693	1.8958	1.80867	1.04817				ENSMUSG00000036698	10	Ago2	protein_coding	ensembl_havana	chr15:73095844-73184840:-
331.791	1.74696	1.24402	1.40428	0.160234	0.329826	6.51356	ENSMUSG00000006519	11	Cyba	protein_coding	ensembl_havana	chr8:122424776-122432930:-
331.232	-7.56229	1.92636	-3.9257				ENSMUSG00000068015	6	Lrch1	protein_coding	ensembl	chr14:74754674-74947877:-
328.214	-1.0147	1.00909	-1.00557	0.314624	0.490172	6.41147	ENSMUSG00000007892	8	Rplp1	protein_coding	ensembl_havana	chr9:61913284-61914542:-
327.991	8.41269	1.96224	4.28728				ENSMUSG00000007570	15	Fance	protein_coding	ensembl_havana	chr17:28313530-28326568:+
327.8	3.4334	1.18836	2.8892	0.0038622	0.0386244	6.41147	ENSMUSG00000022443	16	Myh9	protein_coding	ensembl_havana	chr15:77760587-77842175:-
327.382	0.377403	1.6914	0.22313	0.823434	0.804293	6.51356	ENSMUSG00000001156	9	Mxd1	protein_coding	ensembl_havana	chr6:86647042-86669161:-
324.266	9.08981	2.24501	4.04889				ENSMUSG00000027306	15	Nusap1	protein_coding	ensembl_havana	chr2:119618298-119651244:+
323.904	0.540008	1.59229	0.339139	0.734505	0.787679	6.07075	ENSMUSG00000004207	14	Psap	protein_coding	ensembl_havana	chr10:60277627-60302597:+
323.476	0.986819	1.59706	0.617895	0.536644	0.667505	6.41147	ENSMUSG00000039630	10	Hnrnpu	protein_coding	ensembl_havana	chr1:178321108-178337797:-
323.012	-6.63164	1.82189	-3.63997				ENSMUSG00000032434	9	Cmtm6	protein_coding	ensembl_havana	chr9:114731116-114749344:+
321.258	1.29048	1.1268	1.14526				ENSMUSG00000052837	6	Junb	protein_coding	ensembl_havana	chr8:84974484-84978718:-
320.91	0.600889	1.30466	0.46057	0.645107	0.716802	6.5981	ENSMUSG00000061232	15	H2-K1	protein_coding	ensembl_havana	chr17:33996017-34000333:-
320.321	-0.194424	1.39313	-0.139559	0.889008	0.843614	6.41147	ENSMUSG00000024290	8	Rock1	protein_coding	ensembl	chr18:10064401-10181792:-
320.251	-3.70734	1.64723	-2.25066				ENSMUSG00000031827	13	Cotl1	protein_coding	ensembl_havana	chr8:119809222-119840544:-
318.265	0.570986	1.54482	0.369614	0.71167	0.776201	6.07075	ENSMUSG00000026832	12	Cytip	protein_coding	ensembl_havana	chr2:58129137-58195532:-
317.797	-2.21825	2.04219	-1.08621	0.277386	0.446387	6.5981	ENSMUSG00000058558	12	Rpl5	protein_coding	ensembl_havana	chr5:107900502-107909005:+
316.969	-1.0158	1.65308	-0.614489	0.538892	0.685824	6.07075	ENSMUSG00000058794	12	Nfe2	protein_coding	ensembl_havana	chr15:103248212-103258403:-
316.617	-2.34926	1.43816	-1.63352	0.10236	0.245164	7.14632	ENSMUSG00000020029	5	Nudt4	protein_coding	ensembl	chr10:95547007-95564167:-
315.941	2.1122	1.28604	1.6424	0.100506	0.255358	6.51356	ENSMUSG00000004266	15	Ptpn6	protein_coding	ensembl_havana	chr6:124720707-124738714:-
315.078	-0.377901	2.02301	-0.186802				ENSMUSG00000024725	12	Ostf1	protein_coding	ensembl_havana	chr19:18579328-18631789:-
313.649	4.61276	1.9046	2.4219				ENSMUSG00000040028	10	Elavl1	protein_coding	ensembl_havana	chr8:4285382-4325413:-
313.015	8.15882	2.21448	3.68431				ENSMUSG00000014077	13	Chp1	protein_coding	ensembl_havana	chr2:119547697-119587027:+
312.564	-6.12207	2.1924	-2.79241				ENSMUSG00000024521	7	Pmaip1	protein_coding	ensembl	chr18:66458604-66465550:+
312.536	5.86208	1.7192	3.40977				ENSMUSG00000019979	12	Apaf1	protein_coding	ensembl_havana	chr10:90989311-91082770:-
312.414	1.31098	1.61327	0.812625	0.416433	0.577642	6.41147	ENSMUSG00000028822	11	Tmem50a	protein_coding	ensembl_havana	chr4:134897849-134915024:-
310.245	7.51466	2.12735	3.5324				ENSMUSG00000038658	15	Ric1	protein_coding	ensembl_havana	chr19:29522282-29606829:+
307.439	2.64083	1.96265	1.34554				ENSMUSG00000005873	5	Reep5	protein_coding	ensembl	chr18:34344889-34373415:-
303.485	2.13269	1.66645	1.27978				ENSMUSG00000032322	14	Pstpip1	protein_coding	ensembl_havana	chr9:56089962-56128888:+
301.581	3.2067	2.35364	1.36245				ENSMUSG00000021807	5	2700060E02Rik	protein_coding	ensembl	chr14:19811402-19823823:-
300.265	5.80528	1.64647	3.52589				ENSMUSG00000018707	13	Dync1h1	protein_coding	ensembl_havana	chr12:110601452-110666945:+
298.171	0.662029	1.17799	0.562	0.574116	0.681864	6.51356	ENSMUSG00000019726	10	Lyst	protein_coding	ensembl	chr13:13590409-13777440:+
298.146	2.76601	1.10473	2.50378	0.0122875	0.0741014	6.51356	ENSMUSG00000056501	3	Cebpb	protein_coding	ensembl_havana	chr2:167688915-167690418:+
296.962	-5.33446	1.38421	-3.85379				ENSMUSG00000017291	13	Taok1	protein_coding	ensembl_havana	chr11:77529162-77607815:-
295.423	1.70607	1.24704	1.3681	0.171281	0.34218	6.41147	ENSMUSG00000026786	14	Apbb1ip	protein_coding	ensembl_havana	chr2:22774094-22875653:+
294.794	7.07315	1.53045	4.62161	3.80773e-06	0.00103905	7.14632	ENSMUSG00000033487	14	Fndc3a	protein_coding	ensembl_havana	chr14:72537946-72710003:-
294.768	1.60506	1.6969	0.945876	0.344212	0.520374	6.41147	ENSMUSG00000059182	7	Skap2	protein_coding	ensembl_havana	chr6:51857422-52012549:-
293.352	8.85075	2.72509	3.24787				ENSMUSG00000035234	18	Fam175a	protein_coding	ensembl_havana	chr5:100805192-100820965:-
293.087	7.00509	1.69813	4.12519				ENSMUSG00000026031	15	Cflar	protein_coding	ensembl_havana	chr1:58711508-58758884:+
292.311	9.92429	2.69515	3.68228				ENSMUSG00000045539	3	Sprr3	protein_coding	ensembl_havana	chr3:92456502-92458720:-
291.427	1.32193	1.43083	0.923889	0.355544	0.521303	6.5981	ENSMUSG00000021910	15	Nisch	protein_coding	ensembl_havana	chr14:31170930-31216946:-
290.975	1.55603	1.98677	0.783198				ENSMUSG00000026469	14	Xpr1	protein_coding	ensembl_havana	chr1:155275701-155417415:-
289.392	-7.79865	2.00554	-3.88855				ENSMUSG00000029625	16	Cpsf4	protein_coding	ensembl_havana	chr5:145167213-145182041:+
289.024	5.19936	2.11215	2.46164	0.0138302	0.0800326	6.51356	ENSMUSG00000075163	5	Olfr1107	protein_coding	ensembl_havana	chr2:87068671-87075817:-
288.947	0.353488	1.47388	0.239835	0.810458	0.793021	6.5981	ENSMUSG00000031722	10	Hp	protein_coding	ensembl_havana	chr8:109575128-109579172:-
286.462	-3.34989	1.66727	-2.0092	0.044516	0.15028	7.14632	ENSMUSG00000023010	14	Tmbim6	protein_coding	ensembl_havana	chr15:99392882-99410049:+
286.064	3.7668	1.57877	2.38591	0.0170368	0.092267	6.07075	ENSMUSG00000026034	17	Clk1	protein_coding	ensembl_havana	chr1:58410189-58424066:-
286.043	2.09992	1.80297	1.1647				ENSMUSG00000025809	15	Itgb1	protein_coding	ensembl_havana	chr8:128685654-128733200:+
284.612	0.978655	1.67406	0.5846	0.558817	0.674732	6.51356	ENSMUSG00000036438	12	Calm2	protein_coding	ensembl_havana	chr17:87433412-87446935:-
283.485	4.10859	2.08302	1.97242				ENSMUSG00000041775	7	Mapk1ip1	protein_coding	ensembl_havana	chr7:138835823-138846273:-
282.893	2.5913	1.59702	1.62258				ENSMUSG00000026480	12	Ncf2	protein_coding	ensembl_havana	chr1:152800194-152836991:+
282.307	1.47798	1.66681	0.886708	0.375236	0.540661	6.51356	ENSMUSG00000030654	9	Arl6ip1	protein_coding	ensembl_havana	chr7:118118891-118129662:-
281.997	7.36947	1.87943	3.92113	8.81348e-05	0.0038534	6.5981	ENSMUSG00000025979	13	Mob4	protein_coding	ensembl_havana	chr1:55131231-55154899:+
281.63	1.32652	1.31353	1.00989	0.312547	0.488669	6.41147	ENSMUSG00000026457	14	Adipor1	protein_coding	ensembl_havana	chr1:134415378-134433351:+
281	2.48057	1.9469	1.27411				ENSMUSG00000050608	11	Minos1	protein_coding	ensembl_havana	chr4:139101814-139131113:-
280.744	3.02544	1.67541	1.8058	0.07095	0.208443	6.41147	ENSMUSG00000050144	13	Slc25a44	protein_coding	ensembl_havana	chr3:88410498-88425139:-
280.568	-6.87342	1.79597	-3.82713				ENSMUSG00000008859	7	Rala	protein_coding	ensembl_havana	chr13:17880575-17944239:-
277.866	-0.173981	1.69811	-0.102456	0.918395	0.88504	6.07075	ENSMUSG00000042524	13	Sun2	protein_coding	ensembl_havana	chr15:79724070-79742536:-
277.365	-0.460777	2.0005	-0.230331				ENSMUSG00000046768	13	Rhoj	protein_coding	ensembl_havana	chr12:75308322-75401456:+
276.863	0.327204	2.12767	0.153785				ENSMUSG00000052504	6	Epha3	protein_coding	ensembl	chr16:63543538-63864158:-
276.334	-4.22283	1.67313	-2.52391	0.0116058	0.0744679	6.07075	ENSMUSG00000025993	10	Slc40a1	protein_coding	ensembl_havana	chr1:45908068-45926523:-
275.776	3.30674	1.35206	2.44571	0.0144567	0.0825455	6.51356	ENSMUSG00000058427	10	Cxcl2	protein_coding	ensembl_havana	chr5:90903871-90905938:+
274.957	-3.79317	1.87144	-2.02687	0.0426759	0.156059	6.51356	ENSMUSG00000046805	9	Mpeg1	protein_coding	ensembl	chr19:12460779-12465284:+
274.765	0.408876	1.58003	0.258777	0.795807	0.760025	7.14632	ENSMUSG00000037266	18	Rsrp1	protein_coding	ensembl_havana	chr4:134923592-134927671:+
274.607	-7.09518	1.81807	-3.90259				ENSMUSG00000019951	9	Uhrf1bp1l	protein_coding	ensembl	chr10:89744991-89819869:+
274.217	6.61995	1.70073	3.89242				ENSMUSG00000005610	17	Eif4g2	protein_coding	ensembl_havana	chr7:111067750-111083030:-
274.111	8.79725	2.05705	4.27664	1.89736e-05	0.00207031	6.5981	ENSMUSG00000046169	9	Adamts6	protein_coding	ensembl	chr13:104287873-104494763:+
273.075	4.55519	1.88441	2.41731				ENSMUSG00000029922	15	Mkrn1	protein_coding	ensembl_havana	chr6:39397804-39420462:-
272.909	7.41256	1.68595	4.39666	1.09929e-05	0.00184435	6.41147	ENSMUSG00000023175	15	Bsg	protein_coding	ensembl_havana	chr10:79704491-79711969:+
272.684	-0.340961	1.20729	-0.282419	0.777622	0.78201	6.51356	ENSMUSG00000071076	6	Jund	protein_coding	ensembl_havana	chr8:70698949-70700616:+
272.514	-2.20805	1.52005	-1.45262				ENSMUSG00000026864	13	Hspa5	protein_coding	ensembl_havana	chr2:34771970-34777547:+
272.442	-0.827534	1.59464	-0.518948	0.603797	0.722777	6.07075	ENSMUSG00000052681	7	Rap1b	protein_coding	ensembl	chr10:117814471-117845935:-
271.039	7.30776	1.88108	3.88488	0.000102379	0.00425449	6.51356	ENSMUSG00000034165	16	Ccnd3	protein_coding	ensembl_havana	chr17:47505051-47599691:+
270.284	3.58619	2.13268	1.68154	0.0926575	0.253967	6.07075	ENSMUSG00000019823	17	Mical1	protein_coding	ensembl_havana	chr10:41476314-41487032:+
270.107	0.520232	0.88413	0.588411	0.556256	0.639308	7.14632	ENSMUSG00000054404	13	Slfn5	protein_coding	ensembl_havana	chr11:82951349-82964840:+
270.051	7.33839	1.93333	3.79573				ENSMUSG00000032437	10	Stt3b	protein_coding	ensembl_havana	chr9:115242581-115310421:-
269.831	0.60676	1.33116	0.455814	0.648523	0.693085	7.14632	ENSMUSG00000038393	14	Txnip	protein_coding	ensembl_havana	chr3:96557957-96561883:+
269.609	0.601058	1.83065	0.328331				ENSMUSG00000025161	16	Slc16a3	protein_coding	ensembl_havana	chr11:120948480-120960868:+
268.894	7.24297	1.97807	3.66163				ENSMUSG00000025499	18	Hras	protein_coding	ensembl_havana	chr7:141189105-141194005:-
268.448	1.21279	1.32983	0.91199	0.361774	0.550499	6.07075	ENSMUSG00000039219	17	Arid4b	protein_coding	ensembl_havana	chr13:14063232-14199603:+
267.779	-0.457805	1.45845	-0.313898	0.753599	0.777883	6.41147	ENSMUSG00000030126	17	Tmcc1	protein_coding	ensembl_havana	chr6:116018611-116193486:-
267.712	-1.2363	1.14065	-1.08385	0.278429	0.472924	6.07075	ENSMUSG00000003123	15	Lipe	protein_coding	ensembl_havana	chr7:25379527-25398710:-
267.498	8.23795	1.87487	4.39387	1.11349e-05	0.00184435	6.5981	ENSMUSG00000051390	9	Zbtb22	protein_coding	ensembl_havana	chr17:33915904-33919324:+
267.205	-0.480565	1.66746	-0.288202	0.773192	0.776201	6.5981	ENSMUSG00000024431	14	Nr3c1	protein_coding	ensembl_havana	chr18:39410545-39491301:-
265.94	4.52119	1.54943	2.91797				ENSMUSG00000028412	17	Slc44a1	protein_coding	ensembl_havana	chr4:53440413-53622478:+
265.71	-1.41425	1.61495	-0.875726				ENSMUSG00000040225	15	Prrc2c	protein_coding	ensembl_havana	chr1:162670725-162740556:-
265.593	-3.04841	1.51853	-2.00747				ENSMUSG00000021546	17	Hnrnpk	protein_coding	ensembl_havana	chr13:58391142-58403343:-
264.938	-1.33848	1.8754	-0.713707				ENSMUSG00000021466	11	Ptch1	protein_coding	ensembl_havana	chr13:63508328-63573598:-
264.766	1.32967	1.56398	0.850184				ENSMUSG00000059657	4	Stfa2l1	protein_coding	ensembl	chr16:36156811-36161948:+
264.711	2.43582	1.65856	1.46864	0.141931	0.312059	6.41147	ENSMUSG00000025531	14	Chm	protein_coding	ensembl_havana	chrX:113040593-113185517:-
264.417	-3.65176	1.47121	-2.48215	0.0130593	0.0776116	6.41147	ENSMUSG00000028649	17	Macf1	protein_coding	ensembl_havana	chr4:123349633-123684360:-
263.678	0.561653	1.3798	0.407053	0.683969	0.712232	7.14632	ENSMUSG00000002107	18	Celf2	protein_coding	ensembl_havana	chr2:6539694-7509563:-
263.579	-1.82315	1.16193	-1.56907	0.116631	0.262628	7.14632	ENSMUSG00000021270	13	Hsp90aa1	protein_coding	ensembl_havana	chr12:110690605-110702728:-
263.101	-0.0843971	1.85942	-0.045389	0.963797	0.917402	6.07075	ENSMUSG00000005125	12	Ndrg1	protein_coding	ensembl_havana	chr15:66929321-66969640:-
262.828	7.74458	1.96963	3.93201	8.42403e-05	0.0038534	6.41147	ENSMUSG00000032470	16	Mras	protein_coding	ensembl_havana	chr9:99385420-99437381:-
262.137	0.652291	1.39995	0.46594	0.641259	0.723186	6.41147	ENSMUSG00000071369	11	Map3k5	protein_coding	ensembl_havana	chr10:19934472-20142753:+
260.076	6.32759	1.87472	3.37522				ENSMUSG00000025873	15	Faf2	protein_coding	ensembl_havana	chr13:54621784-54664068:+
259.708	8.97264	2.47139	3.6306				ENSMUSG00000021775	10	Nr1d2	protein_coding	ensembl_havana	chr14:18204054-18239127:-
259.308	-3.86754	1.8917	-2.04448				ENSMUSG00000022255	15	Mtdh	protein_coding	ensembl_havana	chr15:34082694-34142386:+
259.235	4.24631	1.60489	2.64586	0.00814847	0.0609496	6.41147	ENSMUSG00000063810	7	Alms1	protein_coding	ensembl_havana	chr6:85587531-85702753:+
258.802	-1.47372	1.78458	-0.825809				ENSMUSG00000037062	13	Sh3glb1	protein_coding	ensembl_havana	chr3:144683678-144720335:-
258.759	7.07915	1.94466	3.64031	0.000272309	0.0088579	6.51356	ENSMUSG00000021427	9	Ssr1	protein_coding	ensembl	chr13:37971401-37994190:-
257.646	1.81152	1.20147	1.50776	0.131617	0.295964	6.5981	ENSMUSG00000032562	13	Gnai2	protein_coding	ensembl_havana	chr9:107614125-107635367:-
257.431	6.52459	2.16367	3.01552				ENSMUSG00000048814	10	Lonrf2	protein_coding	ensembl_havana	chr1:38793645-38836711:-
257.302	0.422286	1.27812	0.330396	0.741101	0.771993	6.41147	ENSMUSG00000003039	9	Fam32a	protein_coding	ensembl_havana	chr8:72219730-72224418:+
256.66	4.39958	1.27994	3.43734	0.00058746	0.0123274	6.5981	ENSMUSG00000021134	17	Srsf5	protein_coding	ensembl_havana	chr12:80945504-80950507:+
256.047	7.72376	2.33373	3.30962				ENSMUSG00000071654	5	Uqcc3	protein_coding	ensembl	chr19:8880016-8880933:-
255.847	6.02137	2.02907	2.96755	0.00300188	0.0325739	6.41147	ENSMUSG00000079597	1	Gm5483	protein_coding	ensembl	chr16:36184212-36188111:+
255.578	-6.40477	1.81706	-3.52479				ENSMUSG00000035093	16	Secisbp2l	protein_coding	ensembl_havana	chr2:125736986-125782870:-
255.279	-2.54138	1.48393	-1.7126	0.0867867	0.218858	7.14632	ENSMUSG00000071713	4	Csf2rb	protein_coding	ensembl	chr15:78325990-78351000:+
254.961	4.86803	2.0835	2.33647				ENSMUSG00000016921	14	Srsf6	protein_coding	ensembl_havana	chr2:162931528-162937121:+
254.734	3.82186	1.50839	2.53373	0.0112855	0.0719728	6.41147	ENSMUSG00000029062	14	Cdk11b	protein_coding	ensembl_havana	chr4:155624854-155649938:+
253.629	-4.97549	1.95912	-2.53965				ENSMUSG00000032204	13	Aqp9	protein_coding	ensembl_havana	chr9:71110659-71168682:-
253.275	0.55241	1.38121	0.399946	0.689196	0.71379	7.14632	ENSMUSG00000047139	9	Cd24a	protein_coding	ensembl_havana	chr10:43578284-43584265:+
253.251	7.59959	1.8317	4.14892				ENSMUSG00000030043	11	Tacr1	protein_coding	ensembl_havana	chr6:82402334-82560104:+
252.86	-3.0809	1.65088	-1.86622	0.0620104	0.192385	6.51356	ENSMUSG00000030094	8	Xpc	protein_coding	ensembl_havana	chr6:91489305-91515888:-
252.102	6.5439	1.7908	3.65418				ENSMUSG00000020190	13	Mknk2	protein_coding	ensembl_havana	chr10:80665327-80678112:-
250.206	2.60316	1.80809	1.43973				ENSMUSG00000066324	2	Impad1	protein_coding	ensembl_havana	chr4:4762484-4793355:-
248.953	4.76777	1.96766	2.42307				ENSMUSG00000004364	14	Cul3	protein_coding	ensembl_havana	chr1:80264923-80340480:-
247.41	7.2409	1.89492	3.82122				ENSMUSG00000005615	14	Pcyt1a	protein_coding	ensembl_havana	chr16:32430921-32475070:+
246.886	0.562447	1.53258	0.366994	0.713623	0.753237	6.51356	ENSMUSG00000030427	17	Lilra6	protein_coding	ensembl_havana	chr7:3908280-3915503:-
245.676	7.17589	1.96011	3.66097				ENSMUSG00000033713	11	Foxn3	protein_coding	ensembl_havana	chr12:99194980-99450111:-
245.272	0.104521	1.7772	0.0588122	0.953102	0.908347	6.07075	ENSMUSG00000027009	18	Itga4	protein_coding	ensembl_havana	chr2:79255426-79333123:+
244.915	2.73459	1.4843	1.84235				ENSMUSG00000025907	14	Rb1cc1	protein_coding	ensembl_havana	chr1:6206197-6276648:+
244.637	-3.88802	1.67878	-2.31598	0.0205594	0.0974801	6.5981	ENSMUSG00000029311	16	Hsd17b11	protein_coding	ensembl_havana	chr5:103989762-104021919:-
242.167	-5.45907	1.95716	-2.78929				ENSMUSG00000044456	16	Rin3	protein_coding	ensembl_havana	chr12:102283048-102390855:+
241.813	0.116005	1.33938	0.0866103	0.930981	0.848036	6.5981	ENSMUSG00000027639	16	Samhd1	protein_coding	ensembl_havana	chr2:157097533-157135265:-
241.562	1.28707	1.40869	0.913667	0.360892	0.535468	6.41147	ENSMUSG00000023913	17	Pla2g7	protein_coding	ensembl_havana	chr17:43568098-43612201:+
241.291	-2.21779	2.00081	-1.10844				ENSMUSG00000042133	16	Ppig	protein_coding	ensembl_havana	chr2:69722545-69754012:+
241.088	-3.97877	1.64294	-2.42174				ENSMUSG00000031662	8	Snx20	protein_coding	ensembl_havana	chr8:88626563-88636128:-
240.81	-0.68268	1.49094	-0.457884	0.647036	0.718348	6.5981	ENSMUSG00000001175	13	Calm1	protein_coding	ensembl_havana	chr12:100199435-100209806:+
240.647	1.62384	1.66627	0.974534	0.329791	0.473818	7.14632	ENSMUSG00000060591	9	Ifitm2	protein_coding	ensembl_havana	chr7:140954837-140955987:-
239.185	-3.47284	1.8834	-1.84392				ENSMUSG00000098557	1	Kctd12	protein_coding	havana	chr14:102976581-102982637:-
237.854	1.99105	1.40003	1.42215	0.154983	0.326601	6.41147	ENSMUSG00000022831	14	Hcls1	protein_coding	ensembl_havana	chr16:36934983-36963212:+
237.149	1.36319	2.23849	0.608979	0.542538	0.630431	7.14632	ENSMUSG00000008384	8	Sertad1	protein_coding	ensembl_havana	chr7:27486910-27490316:+
235.408	6.46499	1.95752	3.30264				ENSMUSG00000054036	6	Olfr279	protein_coding	ensembl_havana	chr15:98492402-98502637:+
235.157	-0.930499	1.82418	-0.510092	0.609987	0.673461	7.14632	ENSMUSG00000021709	14	Erbin	protein_coding	ensembl_havana	chr13:103818787-103920514:-
234.981	1.41791	1.96696	0.720865				ENSMUSG00000000759	14	Tubgcp3	protein_coding	ensembl_havana	chr8:12614277-12672248:-
231.715	0.489516	1.48265	0.330162	0.741277	0.771993	6.41147	ENSMUSG00000024691	13	Fam111a	protein_coding	ensembl_havana	chr19:12545740-12589768:+
231.306	-1.88339	1.60128	-1.17617				ENSMUSG00000046841	5	Ckap4	protein_coding	ensembl_havana	chr10:84526305-84534062:-
231.065	-4.99979	1.77919	-2.81015	0.00495178	0.0446681	6.51356	ENSMUSG00000037286	15	Stag1	protein_coding	ensembl_havana	chr9:100597798-100959375:+
230.411	-2.01197	1.93653	-1.03895	0.298827	0.475396	6.41147	ENSMUSG00000025351	13	Cd63	protein_coding	ensembl	chr10:128908919-128912816:+
230.023	-0.0839729	1.79595	-0.0467567				ENSMUSG00000040659	3	Efhd2	protein_coding	ensembl_havana	chr4:141858142-141874920:-
229.996	2.8489	1.81302	1.57135				ENSMUSG00000047126	17	Cltc	protein_coding	ensembl_havana	chr11:86694351-86757565:-
229.926	0.460253	1.83115	0.251346	0.801547	0.800479	6.41147	ENSMUSG00000026238	14	Ptma	protein_coding	ensembl_havana	chr1:86526726-86530712:+
229.86	3.69297	1.57895	2.33887	0.019342	0.0963164	6.41147	ENSMUSG00000039936	18	Pik3cd	protein_coding	ensembl_havana	chr4:149649168-149702571:-
229.809	2.46371	1.92864	1.27743				ENSMUSG00000036944	5	Tmem71	protein_coding	ensembl	chr15:66526212-66561046:-
229.683	3.40242	1.71658	1.9821	0.0474681	0.166538	6.41147	ENSMUSG00000020152	7	Actr2	protein_coding	ensembl_havana	chr11:20062304-20112913:-
229.233	-3.86427	2.15911	-1.78975				ENSMUSG00000025592	17	Dach2	protein_coding	ensembl_havana	chrX:113297510-113836386:+
228.624	4.80884	1.75274	2.74361				ENSMUSG00000047036	8	Zfp445	protein_coding	ensembl_havana	chr9:122844529-122866006:-
228.482	-0.542957	1.6654	-0.326021	0.744409	0.764341	6.5981	ENSMUSG00000022378	13	Fam49b	protein_coding	ensembl	chr15:63929097-64060448:-
228.37	-7.02967	1.68795	-4.16462				ENSMUSG00000025534	17	Gusb	protein_coding	ensembl_havana	chr5:129989011-130003049:-
227.427	-0.737419	1.67819	-0.439413	0.660362	0.723293	6.5981	ENSMUSG00000026981	15	Il1rn	protein_coding	ensembl_havana	chr2:24336853-24351494:+
227.366	4.93463	1.24778	3.95473	7.66213e-05	0.00377654	6.5981	ENSMUSG00000027339	15	Rassf2	protein_coding	ensembl_havana	chr2:131989415-132030258:-
226.716	0.613701	1.91694	0.320146				ENSMUSG00000045165	6	AI467606	protein_coding	ensembl_havana	chr7:127091359-127093986:+
226.609	-0.728742	1.50952	-0.482765	0.629263	0.7329	6.07075	ENSMUSG00000022270	15	Fam134b	protein_coding	ensembl	chr15:25843264-25973687:+
226.261	-5.90506	1.96421	-3.00633	0.00264426	0.0306774	6.41147	ENSMUSG00000041459	15	Tardbp	protein_coding	ensembl_havana	chr4:148612382-148627019:-
225.949	5.4256	1.70415	3.18376	0.00145377	0.0209439	6.51356	ENSMUSG00000031751	14	Amfr	protein_coding	ensembl_havana	chr8:93971588-94012842:-
225.861	6.2979	2.00732	3.13746				ENSMUSG00000024012	17	Mtch1	protein_coding	ensembl_havana	chr17:29332072-29347904:-
225.23	2.02773	1.62558	1.24739	0.212253	0.384487	6.5981	ENSMUSG00000048391	3	Olfr843	protein_coding	ensembl_havana	chr9:19242956-19251987:-
224.324	2.15459	1.41513	1.52253	0.127875	0.292682	6.51356	ENSMUSG00000022521	10	Crebbp	protein_coding	ensembl_havana	chr16:4081328-4213997:-
223.916	0.784967	1.50923	0.520111	0.602986	0.701986	6.51356	ENSMUSG00000027763	13	Mbnl1	protein_coding	ensembl_havana	chr3:60472830-60629750:+
223.555	2.94296	1.84934	1.59135				ENSMUSG00000021730	8	Hcn1	protein_coding	ensembl_havana	chr13:117602320-117987418:+
223.299	2.52229	1.31864	1.9128	0.0557734	0.181415	6.5981	ENSMUSG00000027447	6	Cst3	protein_coding	ensembl_havana	chr2:148871722-148875692:-
222.429	-0.548185	1.88691	-0.29052	0.771418	0.779318	6.51356	ENSMUSG00000055531	12	Cpsf6	protein_coding	ensembl_havana	chr10:117344673-117380015:-
222.249	-7.71509	2.06356	-3.73873				ENSMUSG00000040599	13	Mis12	protein_coding	ensembl_havana	chr11:71019611-71027371:+
221.892	-5.82182	1.46732	-3.96766				ENSMUSG00000038095	15	Sbno1	protein_coding	ensembl_havana	chr5:124368702-124426001:-
221.271	-0.112527	1.80475	-0.0623503				ENSMUSG00000000594	7	Gm2a	protein_coding	ensembl_havana	chr11:55098115-55113029:+
220.379	2.86206	2.36426	1.21056				ENSMUSG00000029038	9	Ssu72	protein_coding	ensembl_havana	chr4:155704800-155733879:+
220.064	1.01091	1.62974	0.620287	0.535069	0.625839	7.14632	ENSMUSG00000031824	15	6430548M08Rik	protein_coding	ensembl_havana	chr8:120114152-120165306:+
220.039	6.44038	2.0485	3.14395				ENSMUSG00000021003	9	Galc	protein_coding	ensembl	chr12:98202304-98259459:-
219.862	8.15592	2.11934	3.84833				ENSMUSG00000026914	15	Psmd14	protein_coding	ensembl_havana	chr2:61711694-61800376:+
219.499	-0.12692	1.91838	-0.06616				ENSMUSG00000052056	14	Zfp217	protein_coding	ensembl_havana	chr2:170108643-170148103:-
219.495	6.90675	2.1619	3.19476				ENSMUSG00000031568	16	Rwdd4a	protein_coding	ensembl_havana	chr8:47533664-47552955:+
218.247	1.09354	1.52658	0.716333	0.473786	0.620642	6.41147	ENSMUSG00000034342	9	Cbl	protein_coding	ensembl_havana	chr9:44142976-44234049:-
217.349	-1.19113	1.5338	-0.776588	0.437402	0.612125	6.07075	ENSMUSG00000020594	14	Pum2	protein_coding	ensembl_havana	chr12:8674134-8752581:+
216.676	2.88905	1.2288	2.35111	0.0187174	0.0902016	7.14632	ENSMUSG00000030536	10	Iqgap1	protein_coding	ensembl_havana	chr7:80711583-80825974:-
216.627	-0.244765	1.00078	-0.244575	0.806785	0.802242	6.41147	ENSMUSG00000034614	14	Pik3ip1	protein_coding	ensembl_havana	chr11:3330401-3342971:+
216.625	3.30561	1.52792	2.16347	0.0305048	0.126675	6.51356	ENSMUSG00000018899	16	Irf1	protein_coding	ensembl_havana	chr11:53770014-53778374:+
216.317	-2.32232	1.81531	-1.2793	0.200793	0.390648	6.07075	ENSMUSG00000028367	5	Txn1	protein_coding	ensembl_havana	chr4:57943373-57956411:-
215.948	2.24377	1.54579	1.45153	0.146631	0.317056	6.41147	ENSMUSG00000020919	11	Stat5b	protein_coding	ensembl_havana	chr11:100780731-100850724:-
215.809	0.902521	1.41536	0.637662	0.523694	0.617363	7.14632	ENSMUSG00000069516	7	Lyz2	protein_coding	ensembl	chr10:117277334-117282274:-
215.651	9.83082	2.90137	3.38834				ENSMUSG00000031610	3	Scrg1	protein_coding	ensembl_havana	chr8:57455923-57477585:+
215.535	-2.54219	1.95249	-1.30202				ENSMUSG00000027651	16	Rprd1b	protein_coding	ensembl_havana	chr2:158028497-158132297:+
215.465	0.790678	1.69418	0.466703				ENSMUSG00000018736	14	Ndel1	protein_coding	ensembl_havana	chr11:68821434-68871858:-
215.237	6.32279	1.93563	3.26653	0.00108876	0.0181273	6.41147	ENSMUSG00000026979	16	Psd4	protein_coding	ensembl_havana	chr2:24367580-24414954:+
214.662	3.51726	1.50317	2.33989	0.0192892	0.0980856	6.07075	ENSMUSG00000055670	14	Zzef1	protein_coding	ensembl_havana	chr11:72796226-72927120:+
213.556	-1.90568	1.93288	-0.985924				ENSMUSG00000052889	11	Prkcb	protein_coding	ensembl_havana	chr7:122288751-122634402:+
212.851	3.06239	1.75001	1.74993	0.0801309	0.221123	6.51356	ENSMUSG00000003970	8	Rpl8	protein_coding	ensembl	chr15:76904071-76906318:+
212.264	-1.02968	1.67677	-0.614085	0.539159	0.669297	6.41147	ENSMUSG00000027665	13	Pik3ca	protein_coding	ensembl_havana	chr3:32397671-32468486:+
212.259	6.44754	1.87894	3.43148				ENSMUSG00000062380	4	Tubb3	protein_coding	ensembl_havana	chr8:123411424-123422015:+
212.023	2.86772	1.54778	1.85279				ENSMUSG00000027288	16	Zfp106	protein_coding	ensembl_havana	chr2:120506820-120563843:-
211.983	0.347378	1.17399	0.295894	0.767311	0.745207	7.14632	ENSMUSG00000044786	6	Zfp36	protein_coding	ensembl_havana	chr7:28376784-28380253:-
211.45	3.40282	1.76038	1.933				ENSMUSG00000075062	4	Olfr1271	protein_coding	ensembl_havana	chr2:90260546-90271032:-
211.401	2.20265	1.39693	1.57678	0.114846	0.285213	6.07075	ENSMUSG00000033004	14	Mycbp2	protein_coding	ensembl_havana	chr14:103113411-103346814:-
211.013	2.79441	1.94364	1.43772	0.150513	0.303948	7.14632	ENSMUSG00000062210	13	Tnfaip8	protein_coding	ensembl_havana	chr18:49979427-50107173:+
210.99	8.97621	2.16291	4.15006				ENSMUSG00000067219	9	Nipal1	protein_coding	ensembl_havana	chr5:72647795-72671078:+
210.942	-1.05165	1.58071	-0.6653				ENSMUSG00000030341	17	Tnfrsf1a	protein_coding	ensembl_havana	chr6:125349362-125362484:+
210.091	4.00119	1.89458	2.11191				ENSMUSG00000056268	15	Dennd1b	protein_coding	ensembl_havana	chr1:138963435-139178960:+
209.191	5.38417	1.80007	2.99108				ENSMUSG00000001632	16	Brpf1	protein_coding	ensembl_havana	chr6:113307137-113324860:+
208.029	6.39391	1.77455	3.60311				ENSMUSG00000047146	15	Tet1	protein_coding	ensembl_havana	chr10:62804570-62899118:-
207.761	2.07907	1.45979	1.42423	0.15438	0.333598	6.07075	ENSMUSG00000073664	11	Nbeal1	protein_coding	ensembl_havana	chr1:60180599-60338328:+
207.455	-0.129622	1.46026	-0.0887664	0.929268	0.847743	6.5981	ENSMUSG00000039158	11	Akna	protein_coding	ensembl_havana	chr4:63367125-63403354:-
207.319	6.9192	2.03597	3.39847				ENSMUSG00000020898	18	Ctc1	protein_coding	ensembl_havana	chr11:69015911-69036473:+
207.256	-6.37965	2.34897	-2.71594				ENSMUSG00000032292	8	Nr2e3	protein_coding	ensembl_havana	chr9:59942771-59960659:-
207.027	1.02452	1.24008	0.826173	0.408706	0.538559	7.14632	ENSMUSG00000000787	12	Ddx3x	protein_coding	ensembl_havana	chrX:13280970-13294052:+
206.898	7.14907	1.94088	3.68342	0.000230125	0.00784219	6.51356	ENSMUSG00000096968	1	Gm26620	protein_coding	ensembl	chr1:170885065-170885881:+
206.694	3.48546	1.50724	2.31247				ENSMUSG00000063663	11	Brwd3	protein_coding	ensembl_havana	chrX:108737016-108834372:-
206.08	-0.144757	1.23021	-0.117669	0.90633	0.844901	6.51356	ENSMUSG00000050299	7	Gm9843	protein_coding	ensembl	chr16:76403209-76403712:-
205.457	1.38148	1.54052	0.896766	0.369844	0.540661	6.41147	ENSMUSG00000022876	17	Samsn1	protein_coding	ensembl_havana	chr16:75858793-76022270:-
204.688	2.01422	1.79092	1.12468	0.260723	0.431027	6.5981	ENSMUSG00000073608	4	Gm6086	protein_coding	ensembl_havana	chr1:93990509-94017147:+
203.97	4.48649	1.49483	3.00133	0.00268802	0.0319168	6.07075	ENSMUSG00000004535	12	Tax1bp1	protein_coding	ensembl_havana	chr6:52713729-52766780:+
203.852	1.49363	1.266	1.1798	0.238081	0.413436	6.41147	ENSMUSG00000042599	8	Kdm7a	protein_coding	ensembl_havana	chr6:39136623-39206789:-
203.697	6.87507	1.99343	3.44887				ENSMUSG00000007659	18	Bcl2l1	protein_coding	ensembl_havana	chr2:152780668-152831728:-
203.035	7.06783	2.14687	3.29216				ENSMUSG00000008206	16	Cers4	protein_coding	ensembl_havana	chr8:4493026-4531680:+
202.716	-3.3559	1.19835	-2.80043	0.00510343	0.0458686	6.41147	ENSMUSG00000027787	14	Nmd3	protein_coding	ensembl_havana	chr3:69721985-69756373:+
202.705	2.26922	2.07657	1.09277	0.274493	0.423271	7.14632	ENSMUSG00000029068	16	Ccnl2	protein_coding	ensembl_havana	chr4:155812489-155824543:+
202.56	0.790378	1.61446	0.489562	0.624444	0.710384	6.5981	ENSMUSG00000037921	15	Ddx60	protein_coding	ensembl_havana	chr8:61928087-62038244:+
201.85	10.496	2.09658	5.00623	5.55073e-07	0.000250803	6.07075	ENSMUSG00000003421	13	Nosip	protein_coding	ensembl_havana	chr7:45062429-45078210:+
201.731	-3.78614	1.62364	-2.33188				ENSMUSG00000066037	14	Hnrnpr	protein_coding	ensembl_havana	chr4:136310942-136359447:+
201.456	8.93465	2.23764	3.99289				ENSMUSG00000050994	20	Adgb	protein_coding	ensembl_havana	chr10:10335703-10472326:-
201.188	7.38172	2.30467	3.20294				ENSMUSG00000049612	10	Omg	protein_coding	ensembl_havana	chr11:79500982-79504084:-
200.784	-3.18713	1.92665	-1.65423				ENSMUSG00000038172	14	Ttc39b	protein_coding	ensembl_havana	chr4:83220300-83324255:-
200.491	3.04352	2.00414	1.51861	0.12886	0.276485	7.14632	ENSMUSG00000022857	13	Tmprss15	protein_coding	ensembl_havana	chr16:78953008-79091097:-
200.355	5.44647	1.77626	3.06625				ENSMUSG00000041997	16	Tlk1	protein_coding	ensembl_havana	chr2:70712407-70825728:-
199.088	3.87805	1.37578	2.8188	0.00482037	0.0458686	6.07075	ENSMUSG00000034786	17	Gpsm3	protein_coding	ensembl_havana	chr17:34589806-34591754:+
198.593	4.43561	1.54105	2.87831	0.00399818	0.0397982	6.07075	ENSMUSG00000009907	17	Vps4b	protein_coding	ensembl_havana	chr1:106764071-106796728:-
198.481	5.52079	1.55255	3.55595	0.00037661	0.0105795	6.07075	ENSMUSG00000018008	7	Cyth4	protein_coding	ensembl	chr15:78597047-78622019:+
198.264	2.72154	1.91935	1.41795				ENSMUSG00000090946	3	Ccdc71l	protein_coding	ensembl_havana	chr12:32378704-32382943:+
197.993	0.197976	2.51922	0.0785863				ENSMUSG00000049536	5	Tceal1	protein_coding	ensembl_havana	chrX:136707982-136711478:+
197.707	10.2138	2.71232	3.7657				ENSMUSG00000028007	13	Snx7	protein_coding	ensembl_havana	chr3:117781647-117868936:-
197.346	-9.11141	2.22844	-4.0887				ENSMUSG00000023150	14	Ivns1abp	protein_coding	ensembl_havana	chr1:151344477-151364422:+
196.92	6.7231	2.02862	3.31413				ENSMUSG00000001065	15	Zfp276	protein_coding	ensembl_havana	chr8:123254195-123269745:+
196.916	-0.147259	1.18797	-0.123958	0.901349	0.873914	6.07075	ENSMUSG00000051747	14	Ttn	protein_coding	ensembl_havana	chr2:76703980-76982547:-
196.226	0.43921	1.13943	0.385466	0.699892	0.740195	6.5981	ENSMUSG00000026879	14	Gsn	protein_coding	ensembl_havana	chr2:35256380-35307892:+
195.899	0.480543	1.00104	0.480044	0.631196	0.734325	6.07075	ENSMUSG00000025935	10	Tram1	protein_coding	ensembl_havana	chr1:13564698-13589910:-
195.685	-0.310235	1.37166	-0.226174				ENSMUSG00000041961	14	Znrf3	protein_coding	ensembl_havana	chr11:5276324-5444847:-
195.146	0.126503	1.11718	0.113234	0.909845	0.845093	6.51356	ENSMUSG00000022283	14	Pabpc1	protein_coding	ensembl_havana	chr15:36595661-36608973:-
194.901	7.35968	1.84795	3.98263				ENSMUSG00000035933	4	Cog5	protein_coding	ensembl	chr12:31654869-31937630:+
194.876	-0.190926	1.35457	-0.14095	0.887909	0.86593	6.07075	ENSMUSG00000028859	14	Csf3r	protein_coding	ensembl_havana	chr4:126024550-126044440:+
194.167	4.31702	1.5012	2.87572	0.0040311	0.0387436	6.51356	ENSMUSG00000021488	7	Nsd1	protein_coding	ensembl	chr13:55209782-55318325:+
193.887	1.18319	2.32551	0.508789				ENSMUSG00000038775	14	Vill	protein_coding	ensembl_havana	chr9:119052778-119071525:+
193.372	-1.15385	2.20621	-0.523001				ENSMUSG00000038412	8	Higd1a	protein_coding	ensembl_havana	chr9:121848563-121858362:-
193.259	5.83796	2.02016	2.88985				ENSMUSG00000061436	15	Hipk2	protein_coding	ensembl_havana	chr6:38694390-38876165:-
193.213	6.34004	1.77745	3.56693	0.000361182	0.0105756	6.07075	ENSMUSG00000031467	10	Agpat5	protein_coding	ensembl_havana	chr8:18846277-18891361:+
193	-0.773035	1.68662	-0.458334	0.646712	0.692198	7.14632	ENSMUSG00000022205	15	Sub1	protein_coding	ensembl_havana	chr15:11981339-11996983:-
192.576	-5.75155	1.59897	-3.59702	0.00032188	0.00912839	7.14632	ENSMUSG00000022914	15	Brwd1	protein_coding	ensembl_havana	chr16:95992092-96082526:-
191.557	4.44902	1.84758	2.40802				ENSMUSG00000094200	2	Olfr237-ps1	protein_coding	ensembl_havana	chr6:43146567-43157169:+
190.213	-7.80789	2.63769	-2.96012				ENSMUSG00000028163	17	Nfkb1	protein_coding	ensembl_havana	chr3:135584655-135691547:-
190.101	7.68122	2.20472	3.484				ENSMUSG00000071855	4	Ccdc112	protein_coding	ensembl	chr18:46282151-46311928:-
189.42	-4.02383	1.48627	-2.70734				ENSMUSG00000027422	15	Rrbp1	protein_coding	ensembl_havana	chr2:143947395-144011263:-
189.115	7.57543	2.49009	3.04223				ENSMUSG00000021518	3	Ptdss1	protein_coding	ensembl	chr13:66932830-66998401:+
189.075	5.95643	2.12826	2.79873				ENSMUSG00000066595	9	Mfsd7b	protein_coding	ensembl_havana	chr1:191005847-191026158:-
188.902	-5.4425	1.86068	-2.92501				ENSMUSG00000007041	9	Clic1	protein_coding	ensembl_havana	chr17:35049966-35058749:+
188.532	-4.54907	2.10013	-2.1661				ENSMUSG00000014778	10	Fhod1	protein_coding	ensembl_havana	chr8:105329163-105347953:-
187.749	6.45168	1.82944	3.52659				ENSMUSG00000036550	16	Cnot1	protein_coding	ensembl_havana	chr8:95719451-95807464:-
187.133	-6.82892	1.89391	-3.60573				ENSMUSG00000000693	10	Loxl3	protein_coding	ensembl_havana	chr6:83034173-83052562:+
187.034	9.23103	2.42371	3.80864				ENSMUSG00000026315	13	Serpinb8	protein_coding	ensembl_havana	chr1:107590006-107610484:+
186.666	6.89831	1.84611	3.73667				ENSMUSG00000022791	16	Tnk2	protein_coding	ensembl_havana	chr16:32643874-32683493:+
186.251	-5.98279	1.41379	-4.23175	2.31878e-05	0.00216067	7.14632	ENSMUSG00000032846	9	Zswim6	protein_coding	ensembl	chr13:107724618-107890064:-
185.146	-6.31477	1.5814	-3.99316	6.51975e-05	0.00311169	7.14632	ENSMUSG00000023852	13	Chd1	protein_coding	ensembl_havana	chr17:15704967-17394898:+
185.118	-0.2053	1.61693	-0.126969	0.898965	0.834191	6.5981	ENSMUSG00000021069	16	Pygl	protein_coding	ensembl_havana	chr12:70190811-70231488:-
185.067	2.01897	1.41295	1.4289	0.153033	0.331932	6.07075	ENSMUSG00000029860	16	Zyx	protein_coding	ensembl_havana	chr6:42349630-42360213:+
183.812	5.53298	1.88019	2.94278				ENSMUSG00000041133	11	Smc1a	protein_coding	ensembl_havana	chrX:152016428-152062694:+
183.792	7.79109	1.87611	4.15279	3.2844e-05	0.00257584	6.07075	ENSMUSG00000061273	3	Mmgt1	protein_coding	ensembl_havana	chrX:56585512-56598069:-
183.683	-0.0771208	1.34809	-0.0572075	0.95438	0.86593	6.51356	ENSMUSG00000027940	18	Tpm3	protein_coding	ensembl_havana	chr3:90072649-90100902:+
183.109	-0.420134	2.56936	-0.163517	0.870111	0.833126	6.41147	ENSMUSG00000056870	9	Gulp1	protein_coding	ensembl_havana	chr1:44551511-44796838:+
183.076	-0.410053	1.14932	-0.35678	0.721257	0.725427	7.14632	ENSMUSG00000054717	7	Hmgb2	protein_coding	ensembl_havana	chr8:57511907-57515999:+
183.048	3.50306	1.20826	2.89926				ENSMUSG00000018476	7	Kdm6b	protein_coding	ensembl_havana	chr11:69398508-69413675:-
182.227	7.03831	1.78459	3.94393	8.01556e-05	0.0038534	6.51356	ENSMUSG00000020305	13	Asb3	protein_coding	ensembl_havana	chr11:30885416-31102704:+
181.834	-3.03892	1.77047	-1.71645	0.0860798	0.234685	6.41147	ENSMUSG00000030095	10	Tmem43	protein_coding	ensembl_havana	chr6:91473703-91488463:+
181.28	1.78556	1.36384	1.30922	0.19046	0.366647	6.41147	ENSMUSG00000058818	13	Pirb	protein_coding	ensembl_havana	chr7:3711409-3720391:-
181.221	-9.43828	2.36949	-3.98324				ENSMUSG00000036139	6	Hoxc9	protein_coding	ensembl_havana	chr15:102976439-102985099:+
179.818	6.15619	1.83959	3.3465				ENSMUSG00000039989	7	Cbx4	protein_coding	ensembl_havana	chr11:119077573-119086221:-
179.632	-0.630868	1.54354	-0.408715	0.682749	0.736344	6.51356	ENSMUSG00000024856	10	Cdk2ap2	protein_coding	ensembl_havana	chr19:4097182-4099019:+
179.518	8.42438	2.44711	3.44259				ENSMUSG00000056822	4	Olfr166	protein_coding	ensembl_havana	chr16:19483694-19489882:+
179.498	7.17086	2.08584	3.43788	0.000586295	0.0123274	6.5981	ENSMUSG00000072763	2	5430403G16Rik	protein_coding	havana	chr5:109674545-109691041:-
179.181	7.28178	1.76449	4.12685	3.6777e-05	0.00257584	7.14632	ENSMUSG00000036990	13	Otud4	protein_coding	ensembl_havana	chr8:79639618-79677724:+
178.855	6.99736	1.84421	3.79422				ENSMUSG00000038022	11	Fam188b	protein_coding	ensembl_havana	chr6:55203383-55320222:+
178.742	7.7265	1.93638	3.99017				ENSMUSG00000019794	13	Katna1	protein_coding	ensembl_havana	chr10:7726000-7763150:+
178.673	1.3933	1.94388	0.716762				ENSMUSG00000024900	4	Cpt1a	protein_coding	ensembl	chr19:3323301-3385732:+
178.503	-1.75279	1.91754	-0.914084				ENSMUSG00000064109	8	Hcst	protein_coding	ensembl_havana	chr7:30417712-30419854:-
178.431	6.29912	2.04087	3.08649				ENSMUSG00000062184	11	Hs6st2	protein_coding	ensembl_havana	chrX:51387212-51681856:-
178.338	-1.15615	1.89718	-0.609404	0.542257	0.671208	6.41147	ENSMUSG00000032508	8	Myd88	protein_coding	ensembl_havana	chr9:119335934-119341411:-
178.263	0.02735	1.45916	0.0187436	0.985046	0.876819	6.5981	ENSMUSG00000020841	5	Cpd	protein_coding	ensembl_havana	chr11:76778424-76847018:-
178.07	0.278497	0.911635	0.305492	0.759992	0.779318	6.41147	ENSMUSG00000042369	8	Rbm45	protein_coding	ensembl_havana	chr2:76369984-76383768:+
177.986	2.67702	1.60626	1.66662				ENSMUSG00000030779	15	Rbbp6	protein_coding	ensembl_havana	chr7:122965686-123002557:+
177.695	-2.77866	2.40598	-1.1549	0.248132	0.424789	6.41147	ENSMUSG00000051682	15	Treml4	protein_coding	ensembl_havana	chr17:48264295-48275360:+
177.103	2.7907	2.22963	1.25164				ENSMUSG00000059714	13	Flot1	protein_coding	ensembl_havana	chr17:35823230-35832791:+
176.794	0.488707	1.5754	0.310211	0.7564	0.773241	6.51356	ENSMUSG00000020423	6	Btg2	protein_coding	ensembl_havana	chr1:134075170-134079120:-
176.163	6.44253	1.82778	3.52479				ENSMUSG00000034940	15	Synrg	protein_coding	ensembl_havana	chr11:83964428-84044578:+
176.055	4.50844	2.0286	2.22243	0.0262539	0.11973	6.07075	ENSMUSG00000031232	16	Magt1	protein_coding	ensembl_havana	chrX:105968084-106011906:-
175.528	7.00637	2.33828	2.99637				ENSMUSG00000067931	5	Zfp948	protein_coding	ensembl	chr17:21567046-21588697:+
175.491	-0.70841	1.43324	-0.494272				ENSMUSG00000021282	16	Eif5	protein_coding	ensembl	chr12:111538101-111546753:+
175.404	1.26047	1.70617	0.738776	0.460043	0.611081	6.41147	ENSMUSG00000040345	9	Arhgap9	protein_coding	ensembl	chr10:127323727-127329943:+
175.116	-0.216222	1.82102	-0.118737	0.905484	0.838649	6.5981	ENSMUSG00000022663	3	Atg3	protein_coding	ensembl_havana	chr16:45158785-45188538:+
175.047	0.944985	1.54224	0.612736	0.540051	0.68654	6.07075	ENSMUSG00000028581	17	Laptm5	protein_coding	ensembl_havana	chr4:130913125-130936141:+
174.628	3.67621	1.80646	2.03503				ENSMUSG00000044894	14	Uqcrq	protein_coding	ensembl_havana	chr11:53427922-53430831:-
174.597	2.92374	1.51223	1.93339	0.0531878	0.17641	6.5981	ENSMUSG00000005103	12	Wdr1	protein_coding	ensembl_havana	chr5:38526813-38563221:-
174.364	0.740425	1.98468	0.373071	0.709096	0.722237	7.14632	ENSMUSG00000002996	17	Hbp1	protein_coding	ensembl_havana	chr12:31926254-31950535:-
174.074	-2.36549	1.64981	-1.4338				ENSMUSG00000026483	13	Fam129a	protein_coding	ensembl_havana	chr1:151571186-151721939:+
173.535	-4.36085	1.8434	-2.36565				ENSMUSG00000044857	7	Lemd2	protein_coding	ensembl	chr17:27189601-27204438:-
173.405	-0.556755	1.83768	-0.302966				ENSMUSG00000059323	13	Tonsl	protein_coding	ensembl_havana	chr15:76622088-76639958:-
172.845	4.18246	1.60594	2.60437	0.00920426	0.061471	7.14632	ENSMUSG00000024953	16	Prdx5	protein_coding	ensembl_havana	chr19:6906697-6910106:-
172.334	5.95157	1.78145	3.34085				ENSMUSG00000024045	5	Akap8	protein_coding	ensembl	chr17:32303676-32321153:-
172.163	-8.2252	2.01342	-4.08519				ENSMUSG00000043939	14	A530064D06Rik	protein_coding	ensembl	chr17:48151896-48167270:-
172.107	-4.80302	1.48824	-3.22732	0.00124953	0.0191496	6.5981	ENSMUSG00000079017	3	Ifi27l2a	protein_coding	ensembl_havana	chr12:103442167-103443680:-
171.397	-1.26954	1.97417	-0.643076	0.520175	0.648529	6.51356	ENSMUSG00000017670	16	Elmo2	protein_coding	ensembl_havana	chr2:165288031-165326479:-
171.099	4.14568	1.44162	2.87571	0.00403121	0.0387436	6.51356	ENSMUSG00000030413	7	Pglyrp1	protein_coding	ensembl_havana	chr7:18871331-18890459:+
170.735	-2.38066	1.8912	-1.25881	0.208099	0.383701	6.51356	ENSMUSG00000060636	13	Rpl35a	protein_coding	ensembl_havana	chr16:33056453-33060189:+
170.313	-7.63012	2.33461	-3.26827				ENSMUSG00000052962	3	Mrpl35	protein_coding	ensembl_havana	chr6:71812997-71826969:-
169.159	0.829641	1.76363	0.470416	0.638058	0.713897	6.5981	ENSMUSG00000039286	12	Fndc3b	protein_coding	ensembl_havana	chr3:27416162-27711307:-
168.524	1.34061	1.62891	0.823011	0.410502	0.540198	7.14632	ENSMUSG00000028248	15	Pnisr	protein_coding	ensembl_havana	chr4:21847583-21876475:+
168.465	0.0344647	1.15358	0.0298762	0.976166	0.924614	6.07075	ENSMUSG00000027360	5	Hdc	protein_coding	ensembl_havana	chr2:126593667-126619299:-
168.463	-2.89134	1.69819	-1.70261	0.0886419	0.222094	7.14632	ENSMUSG00000031377	11	Bmx	protein_coding	ensembl_havana	chrX:164192842-164258193:-
168.395	6.44137	1.91509	3.36348				ENSMUSG00000057400	14	Ces1c	protein_coding	ensembl_havana	chr8:93099015-93131283:-
168.165	0.405687	1.26231	0.321384	0.747919	0.774219	6.41147	ENSMUSG00000020390	12	Ube2b	protein_coding	ensembl_havana	chr11:51985497-52000762:-
167.971	5.01075	2.08121	2.40761				ENSMUSG00000034247	9	Plekhm1	protein_coding	ensembl_havana	chr11:103364275-103412687:-
167.63	-25.2406	2.62954	-9.59884				ENSMUSG00000014543	14	Klra17	protein_coding	ensembl_havana	chr6:129831154-129876672:-
167.325	2.88486	1.56676	1.84129	0.0655796	0.198273	6.5981	ENSMUSG00000032376	12	Usp3	protein_coding	ensembl_havana	chr9:66514637-66593142:-
167.292	-3.71638	1.53453	-2.42183				ENSMUSG00000032386	15	Trip4	protein_coding	ensembl_havana	chr9:65828930-65908794:-
167.259	7.26414	2.00462	3.62371	0.000290412	0.00905146	6.5981	ENSMUSG00000063760	9	Rnf217	protein_coding	ensembl_havana	chr10:31493193-31609184:-
166.941	6.1727	1.85869	3.321				ENSMUSG00000026019	15	Wdr12	protein_coding	ensembl_havana	chr1:60069785-60098645:-
166.571	2.34888	1.77172	1.32576	0.184919	0.336144	7.14632	ENSMUSG00000039145	16	Camk1d	protein_coding	ensembl_havana	chr2:5293457-5714515:-
166.05	4.38306	2.39101	1.83314				ENSMUSG00000063386	2	Olfr1387	protein_coding	ensembl_havana	chr11:49455343-49464001:+
165.901	-0.523352	1.78446	-0.293283	0.769306	0.745927	7.14632	ENSMUSG00000045176	3	Borcs6	protein_coding	ensembl_havana	chr11:69059717-69061578:+
164.791	1.1164	1.05031	1.06293	0.287814	0.436926	7.14632	ENSMUSG00000030045	10	Mrpl19	protein_coding	ensembl_havana	chr6:81957851-81965958:-
164.532	1.44617	1.62155	0.891847	0.372475	0.561149	6.07075	ENSMUSG00000025220	7	Mgea5	protein_coding	ensembl	chr19:45750261-45783520:-
164.164	-5.72678	2.31211	-2.47686				ENSMUSG00000004642	13	Slbp	protein_coding	ensembl_havana	chr5:33634952-33652574:-
164.009	4.19317	2.23451	1.87655				ENSMUSG00000003814	8	Calr	protein_coding	ensembl_havana	chr8:84841850-84846934:-
163.992	-1.0101	1.0693	-0.94464	0.344843	0.485811	7.14632	ENSMUSG00000023764	18	Sfi1	protein_coding	ensembl_havana	chr11:3131850-3193463:-
163.831	-7.13293	1.63802	-4.35459	1.33314e-05	0.00204276	6.07075	ENSMUSG00000022765	8	Snap29	protein_coding	ensembl_havana	chr16:17406003-17430826:+
162.629	-0.868359	1.84688	-0.470176				ENSMUSG00000071415	6	Rpl23	protein_coding	ensembl_havana	chr11:97777527-97782437:-
162.446	-0.687758	1.63302	-0.421158	0.67364	0.758805	6.07075	ENSMUSG00000028497	12	Hacd4	protein_coding	ensembl_havana	chr4:88396144-88438928:-
162.365	-7.47336	1.74082	-4.29302	1.76259e-05	0.00204276	7.14632	ENSMUSG00000047180	8	Neurl3	protein_coding	ensembl_havana	chr1:36264597-36274679:-
162.351	2.74759	2.2462	1.22322				ENSMUSG00000025139	14	Tollip	protein_coding	ensembl_havana	chr7:141874813-141918507:-
162.238	-1.55233	1.68299	-0.922365	0.356338	0.526011	6.51356	ENSMUSG00000030474	9	Siglece	protein_coding	ensembl_havana	chr7:43651070-43660161:-
161.611	1.40201	1.82501	0.768221	0.442356	0.592819	6.51356	ENSMUSG00000024750	10	Zfand5	protein_coding	ensembl_havana	chr19:21272278-21282289:+
160.668	1.44473	1.61871	0.89252	0.372114	0.561149	6.07075	ENSMUSG00000034641	2	Cd300ld	protein_coding	ensembl_havana	chr11:114982274-114989922:-
160.078	6.10349	2.34761	2.59987				ENSMUSG00000022123	8	Scel	protein_coding	ensembl	chr14:103513341-103613346:+
160.066	6.31033	1.9989	3.1569				ENSMUSG00000042371	12	Slc5a10	protein_coding	ensembl_havana	chr11:61672781-61720826:-
159.951	-7.05305	2.02199	-3.48817	0.00048634	0.0118502	6.07075	ENSMUSG00000034300	16	Fam53c	protein_coding	ensembl	chr18:34758906-34773760:+
159.691	-5.93469	1.86168	-3.1878				ENSMUSG00000033257	14	Ttll4	protein_coding	ensembl_havana	chr1:74661745-74703730:+
159.507	-0.933987	1.37691	-0.678322	0.497568	0.639249	6.41147	ENSMUSG00000006699	17	Cdc42	protein_coding	ensembl_havana	chr4:137319696-137357720:-
159.43	4.5266	1.62752	2.78129	0.00541431	0.0485287	6.07075	ENSMUSG00000025492	6	Ifitm3	protein_coding	ensembl_havana	chr7:141009586-141010770:-
159.428	-1.97143	1.51469	-1.30154				ENSMUSG00000045730	3	Adrb2	protein_coding	ensembl	chr18:62177817-62179959:-
159.028	5.56383	2.003	2.77775				ENSMUSG00000012609	18	Ttll5	protein_coding	ensembl_havana	chr12:85824659-86061893:+
158.762	1.93153	1.7168	1.12508				ENSMUSG00000004609	11	Cd33	protein_coding	ensembl_havana	chr7:43524216-43544428:-
158.522	4.60697	1.43915	3.20118	0.00136865	0.0201186	6.5981	ENSMUSG00000018654	17	Ikzf1	protein_coding	ensembl_havana	chr11:11685003-11772926:+
157.635	2.15416	1.46847	1.46695	0.14239	0.312085	6.41147	ENSMUSG00000075284	10	Wipf1	protein_coding	ensembl_havana	chr2:73429610-73529734:-
157.055	5.36285	2.26732	2.36528				ENSMUSG00000024497	3	Pou4f3	protein_coding	ensembl_havana	chr18:42394539-42397249:+
156.998	2.53435	1.73434	1.46128				ENSMUSG00000000078	6	Klf6	protein_coding	ensembl	chr13:5861489-5870393:+
156.493	1.04165	1.99326	0.522583				ENSMUSG00000017781	17	Pitpna	protein_coding	ensembl_havana	chr11:75588097-75628804:+
155.49	-7.51312	2.18522	-3.43816				ENSMUSG00000099564	2	Gm28729	protein_coding	havana	chr9:96486001-96525264:-
155.462	-2.81385	1.32067	-2.13062	0.0331206	0.133964	6.51356	ENSMUSG00000074677	11	Sirpb1c	protein_coding	ensembl_havana	chr3:15795145-15848528:-
155.445	-2.00032	1.6607	-1.2045				ENSMUSG00000036006	19	Fam65b	protein_coding	ensembl_havana	chr13:24582189-24733816:+
155.064	-7.8386	1.65509	-4.73606				ENSMUSG00000054141	4	Olfr24	protein_coding	ensembl_havana	chr9:18751507-18763996:-
154.867	1.04178	1.6654	0.625547	0.531612	0.663705	6.41147	ENSMUSG00000015950	13	Ncf1	protein_coding	ensembl_havana	chr5:134220053-134229625:-
154.808	0.373901	0.899752	0.41556	0.677732	0.731896	6.5981	ENSMUSG00000018395	19	Kif3a	protein_coding	ensembl_havana	chr11:53567379-53601967:+
154.354	6.2032	1.80791	3.43114				ENSMUSG00000108022	1	Gm7298	protein_coding	havana	chr6:121732932-121789084:+
154.201	1.04911	1.7618	0.595474	0.551527	0.637092	7.14632	ENSMUSG00000002699	13	Lcp2	protein_coding	ensembl_havana	chr11:34046920-34092295:+
153.815	-8.7815	1.70682	-5.14496	2.67579e-07	0.000234862	6.07075	ENSMUSG00000032245	12	Cln6	protein_coding	ensembl_havana	chr9:62838785-62852006:+
153.631	-3.75237	2.02109	-1.85661				ENSMUSG00000018425	18	Dhx40	protein_coding	ensembl_havana	chr11:86768846-86807746:-
153.262	2.96112	1.51043	1.96046	0.0499426	0.161002	7.14632	ENSMUSG00000030655	15	Smg1	protein_coding	ensembl_havana	chr7:118131308-118243670:-
153.082	7.3777	2.13079	3.46243				ENSMUSG00000108929	1	Cc2d2b	protein_coding	havana	chr19:40748753-40827743:+
152.858	8.64975	2.47823	3.49029				ENSMUSG00000078197	2	Gm17374	protein_coding	ensembl	chr2:140152043-140153532:+
152.759	3.83551	2.0224	1.89652				ENSMUSG00000060216	15	Arrb2	protein_coding	ensembl_havana	chr11:70432635-70440828:+
152.647	0.133361	1.96655	0.0678144	0.945933	0.856391	6.5981	ENSMUSG00000039105	6	Atp6v1g1	protein_coding	ensembl_havana	chr4:63544772-63550750:+
152.356	1.11525	2.1309	0.523371				ENSMUSG00000024081	8	Cebpz	protein_coding	ensembl	chr17:78919006-78937070:-
152.015	7.98855	1.91304	4.17585	2.96874e-05	0.00257584	6.41147	ENSMUSG00000043004	13	Gng2	protein_coding	ensembl_havana	chr14:19872559-19977627:-
151.852	5.73058	2.07836	2.75726	0.00582883	0.0490857	6.41147	ENSMUSG00000036503	13	Rnf13	protein_coding	ensembl_havana	chr3:57736062-57835233:+
151.643	1.21452	1.51417	0.802102	0.422494	0.583226	6.41147	ENSMUSG00000048534	7	Amica1	protein_coding	ensembl_havana	chr9:45079183-45108534:+
151.62	8.94601	2.48659	3.5977				ENSMUSG00000044025	5	Olfr790	protein_coding	havana	chr10:129498492-129503342:+
151.525	3.60342	1.56761	2.29867				ENSMUSG00000030016	14	Zfp638	protein_coding	ensembl_havana	chr6:83867109-83989550:+
151.461	-7.56246	2.42207	-3.12232				ENSMUSG00000051977	14	Prdm9	protein_coding	ensembl_havana	chr17:15543079-15564354:-
151.393	-1.1742	1.3732	-0.855083	0.392505	0.526789	7.14632	ENSMUSG00000026987	16	Baz2b	protein_coding	ensembl_havana	chr2:59899363-60209839:-
150.536	4.95145	1.6722	2.96105	0.00306594	0.0324898	6.5981	ENSMUSG00000000568	15	Hnrnpd	protein_coding	ensembl_havana	chr5:99955935-99978938:-
150.498	-5.41906	1.67076	-3.24348	0.00118081	0.0187784	6.51356	ENSMUSG00000042541	10	Shfm1	protein_coding	ensembl_havana	chr6:6557294-6578663:-
150.316	6.58258	1.91783	3.43231				ENSMUSG00000024422	14	Dhx16	protein_coding	ensembl_havana	chr17:35879819-35892670:+
150.26	8.1657	2.36421	3.45388				ENSMUSG00000022329	14	Stk3	protein_coding	ensembl_havana	chr15:34875496-35155806:-
150.022	4.65918	2.00491	2.32388				ENSMUSG00000029344	14	Tpst2	protein_coding	ensembl_havana	chr5:112276691-112315361:+
149.694	8.3108	2.06033	4.03373	5.48994e-05	0.00311025	6.41147	ENSMUSG00000027091	14	Zc3h15	protein_coding	ensembl_havana	chr2:83644435-83664622:+
149.562	8.15614	2.43166	3.35415				ENSMUSG00000039611	2	Tmem246	protein_coding	ensembl_havana	chr4:49584506-49597876:-
149.26	-9.17957	2.61532	-3.50992				ENSMUSG00000079579	3	Gm6760	protein_coding	ensembl_havana	chrX:64151405-64152198:-
149.256	1.99235	1.9078	1.04432				ENSMUSG00000059108	4	Ifitm6	protein_coding	ensembl_havana	chr7:141015699-141017924:-
149.182	3.42874	1.86259	1.84085	0.0656442	0.198776	6.51356	ENSMUSG00000025019	15	Lcor	protein_coding	ensembl	chr19:41482645-41562246:+
149.01	5.95598	2.12242	2.80622				ENSMUSG00000025597	13	Klhl4	protein_coding	ensembl_havana	chrX:114474333-114560829:+
148.907	-3.41946	1.86813	-1.83042				ENSMUSG00000019564	12	Arid3a	protein_coding	ensembl_havana	chr10:79927043-79955018:+
148.459	-2.05253	2.07597	-0.98871				ENSMUSG00000031216	13	Stard8	protein_coding	ensembl_havana	chrX:99003248-99074728:+
148.378	1.93611	1.66311	1.16415				ENSMUSG00000001774	8	Chordc1	protein_coding	ensembl_havana	chr9:18292125-18317442:+
148.005	-7.3799	1.79658	-4.10774				ENSMUSG00000025001	11	Hells	protein_coding	ensembl_havana	chr19:38930915-38971051:+
147.42	-0.670228	1.38195	-0.484986	0.627686	0.732485	6.07075	ENSMUSG00000031229	16	Atrx	protein_coding	ensembl_havana	chrX:105797615-105929403:-
147.324	4.47559	1.88807	2.37046	0.017766	0.0909106	6.51356	ENSMUSG00000048076	14	Arf1	protein_coding	ensembl_havana	chr11:59211412-59228270:-
146.726	1.80403	1.6315	1.10575				ENSMUSG00000031431	13	Tsc22d3	protein_coding	ensembl_havana	chrX:140539528-140600659:-
146.709	-2.45019	1.96837	-1.24478				ENSMUSG00000026721	15	Rabgap1l	protein_coding	ensembl_havana	chr1:160219174-160793211:-
146.631	0.54436	1.11838	0.486739	0.626443	0.713105	6.51356	ENSMUSG00000039899	5	Fgl2	protein_coding	ensembl_havana	chr5:21372642-21378374:+
146.558	4.75511	2.06117	2.307				ENSMUSG00000031818	12	Cox4i1	protein_coding	ensembl_havana	chr8:120668222-120674207:+
146.529	-0.417449	1.61965	-0.25774	0.796607	0.760025	7.14632	ENSMUSG00000025290	16	Rps24	protein_coding	ensembl	chr14:24490681-24496146:+
146.273	3.24801	2.02939	1.60049	0.10949	0.267976	6.41147	ENSMUSG00000041841	7	Rpl37	protein_coding	ensembl	chr15:5116613-5119140:+
146.194	7.10369	2.05208	3.46171	0.000536764	0.0118502	6.5981	ENSMUSG00000033538	13	Casp4	protein_coding	ensembl_havana	chr9:5308828-5336783:+
146.182	4.2985	1.90894	2.25177				ENSMUSG00000022510	14	Trp63	protein_coding	ensembl_havana	chr16:25683763-25892102:+
145.03	-2.73029	1.5603	-1.74985	0.0801447	0.232283	6.07075	ENSMUSG00000033335	17	Dnm2	protein_coding	ensembl_havana	chr9:21424908-21507759:+
144.894	-7.08717	1.8515	-3.8278				ENSMUSG00000034349	14	Smc4	protein_coding	ensembl_havana	chr3:69004738-69034623:+
144.773	5.60785	1.72902	3.24338				ENSMUSG00000049553	11	Polr1a	protein_coding	ensembl_havana	chr6:71909053-71984935:+
144.699	2.73103	2.28153	1.19702				ENSMUSG00000063659	11	Zbtb18	protein_coding	ensembl_havana	chr1:177442351-177450764:+
144.437	2.31546	1.50402	1.53951	0.123679	0.268807	7.14632	ENSMUSG00000024053	10	Emilin2	protein_coding	ensembl	chr17:71252176-71310965:-
144.402	5.88715	1.62578	3.62112				ENSMUSG00000052609	8	Plekhg3	protein_coding	ensembl	chr12:76533560-76579039:+
144.049	0.413469	1.19481	0.346054	0.729302	0.784832	6.07075	ENSMUSG00000030786	18	Itgam	protein_coding	ensembl_havana	chr7:128062640-128118491:+
144.029	-0.197309	1.42888	-0.138087	0.890172	0.830748	6.5981	ENSMUSG00000057322	12	Rpl38	protein_coding	ensembl_havana	chr11:114668524-114672331:+
143.918	5.34203	1.56206	3.41986	0.000626534	0.0123274	7.14632	ENSMUSG00000030275	6	Etnk1	protein_coding	ensembl_havana	chr6:143167221-143232307:+
143.913	-5.71392	1.86954	-3.05632				ENSMUSG00000053774	8	Ubxn7	protein_coding	ensembl	chr16:32332252-32393747:+
143.768	-0.620953	1.78957	-0.346985				ENSMUSG00000022051	15	Bnip3l	protein_coding	ensembl_havana	chr14:66985239-67008877:-
143.698	2.46554	1.37787	1.78939	0.0735519	0.201579	7.14632	ENSMUSG00000000184	12	Ccnd2	protein_coding	ensembl_havana	chr6:127125162-127152193:-
143.634	-5.63829	2.01138	-2.8032				ENSMUSG00000027942	16	4933434E20Rik	protein_coding	ensembl_havana	chr3:90051636-90068347:+
143.48	0.757509	1.65757	0.456999	0.647672	0.722777	6.51356	ENSMUSG00000024294	13	Mib1	protein_coding	ensembl_havana	chr18:10725548-10818704:+
143.479	8.81174	2.43104	3.62468				ENSMUSG00000065990	12	Aurkaip1	protein_coding	ensembl_havana	chr4:155831272-155833130:+
143.062	0.014719	1.4757	0.00997423	0.992042	0.881565	6.5981	ENSMUSG00000003153	10	Slc2a3	protein_coding	ensembl_havana	chr6:122727809-122801640:-
142.992	7.24278	2.25583	3.2107				ENSMUSG00000059552	13	Trp53	protein_coding	ensembl_havana	chr11:69580359-69591873:+
142.569	-7.96729	2.3551	-3.383				ENSMUSG00000022800	13	Fyttd1	protein_coding	ensembl_havana	chr16:32877500-32908963:+
142.341	-0.232017	1.58801	-0.146106	0.883838	0.795174	7.14632	ENSMUSG00000032294	17	Pkm	protein_coding	ensembl_havana	chr9:59656368-59679375:+
142.295	1.32888	2.14066	0.620781	0.534744	0.655486	6.5981	ENSMUSG00000015656	17	Hspa8	protein_coding	ensembl_havana	chr9:40800984-40810087:+
142.267	6.70773	2.47656	2.70849				ENSMUSG00000075063	2	Olfr142	protein_coding	ensembl_havana	chr2:90250130-90257592:-
142.049	0.872648	1.25398	0.695905	0.486488	0.650016	6.07075	ENSMUSG00000028874	14	Fgr	protein_coding	ensembl_havana	chr4:132974095-133001910:+
141.954	6.74056	2.11323	3.18969				ENSMUSG00000032745	17	Gpbp1	protein_coding	ensembl_havana	chr13:111425680-111490111:-
141.843	-2.31942	1.44873	-1.601	0.109377	0.254192	7.14632	ENSMUSG00000057143	15	Trim12c	protein_coding	ensembl_havana	chr7:104338754-104353362:-
141.824	-1.13019	1.5461	-0.730998				ENSMUSG00000040481	17	Bptf	protein_coding	ensembl_havana	chr11:107033081-107132127:-
141.695	-0.854706	1.86512	-0.458258	0.646767	0.742318	6.07075	ENSMUSG00000093674	7	Rpl41	protein_coding	ensembl_havana	chr10:128548114-128549305:-
141.624	-6.42362	1.81305	-3.54298				ENSMUSG00000036002	12	Fam214b	protein_coding	ensembl_havana	chr4:43032414-43046220:-
141.431	4.87727	1.76367	2.76541				ENSMUSG00000025780	7	Itih5	protein_coding	ensembl_havana	chr2:10153571-10256529:+
141.345	-7.25888	1.95059	-3.72138	0.00019814	0.00657159	7.14632	ENSMUSG00000031447	7	Lamp1	protein_coding	ensembl_havana	chr8:13159161-13175338:+
140.979	2.49499	1.77123	1.40862				ENSMUSG00000047714	14	Ppp1r2	protein_coding	ensembl_havana	chr16:31251537-31275277:-
140.628	5.09529	1.66198	3.0658				ENSMUSG00000034218	15	Atm	protein_coding	ensembl_havana	chr9:53439149-53536740:-
140.451	0.628269	2.07807	0.302333	0.762398	0.780685	6.41147	ENSMUSG00000030759	16	Far1	protein_coding	ensembl_havana	chr7:113513834-113571511:+
140.139	2.11172	1.81858	1.16119	0.245565	0.423065	6.41147	ENSMUSG00000030589	15	Rasgrp4	protein_coding	ensembl_havana	chr7:29134851-29153961:+
139.98	3.50421	1.60773	2.1796				ENSMUSG00000033943	15	Mga	protein_coding	ensembl_havana	chr2:119897228-119969581:+
139.73	3.02639	2.0859	1.45088				ENSMUSG00000057270	3	Olfr1501	protein_coding	ensembl_havana	chr19:13835033-13850692:-
139.617	-3.9026	1.91568	-2.03719				ENSMUSG00000029528	18	Pxn	protein_coding	ensembl_havana	chr5:115506676-115555987:+
139.535	1.95533	1.79126	1.09159	0.275012	0.443945	6.5981	ENSMUSG00000026872	17	Zeb2	protein_coding	ensembl_havana	chr2:44983632-45117395:-
139.434	3.86682	2.10807	1.8343				ENSMUSG00000024338	14	Psmb8	protein_coding	ensembl_havana	chr17:34197721-34201454:+
139.271	5.51962	1.78082	3.09948				ENSMUSG00000000275	16	Trim25	protein_coding	ensembl_havana	chr11:88999376-89020293:+
138.934	2.70875	1.62647	1.66542				ENSMUSG00000089809	9	A930011G23Rik	protein_coding	ensembl_havana	chr5:99217426-99729065:-
138.919	1.37387	1.67285	0.821274	0.41149	0.568488	6.51356	ENSMUSG00000024853	9	Sf3b2	protein_coding	ensembl	chr19:5273923-5295455:-
138.648	-8.03473	2.31441	-3.47161				ENSMUSG00000070697	4	Utp3	protein_coding	ensembl_havana	chr5:88554462-88556090:+
138.628	-2.20251	1.25368	-1.75684	0.0789457	0.217295	6.5981	ENSMUSG00000024073	14	Birc6	protein_coding	ensembl_havana	chr17:74528295-74703356:+
138.297	-0.0397951	1.91111	-0.020823	0.983387	0.87571	6.5981	ENSMUSG00000042548	13	Asxl1	protein_coding	ensembl_havana	chr2:153345845-153404007:+
138.147	6.15167	2.14054	2.87389				ENSMUSG00000038975	14	Rabggtb	protein_coding	ensembl_havana	chr3:153907287-153913009:-
137.978	6.76793	2.23908	3.02264				ENSMUSG00000096001	2	2610528A11Rik	protein_coding	ensembl_havana	chr14:37102140-37114022:-
137.717	-6.64641	1.85912	-3.57503				ENSMUSG00000035551	6	Igfbpl1	protein_coding	ensembl_havana	chr4:45809468-45826923:-
137.708	4.05688	1.84119	2.2034				ENSMUSG00000026600	12	Soat1	protein_coding	ensembl_havana	chr1:156424525-156474331:-
137.673	3.76617	1.98386	1.89841				ENSMUSG00000037788	14	Vopp1	protein_coding	ensembl_havana	chr6:57727807-57825159:-
137.452	-5.02215	2.12908	-2.35883				ENSMUSG00000054758	4	Gm9956	protein_coding	ensembl	chr10:56745134-56748254:+
137.335	0.504413	1.34416	0.375262	0.707466	0.749133	6.51356	ENSMUSG00000057596	13	Trim30d	protein_coding	ensembl_havana	chr7:104470014-104507849:-
137.08	5.44831	1.61549	3.37255				ENSMUSG00000032243	8	Itga11	protein_coding	ensembl_havana	chr9:62677826-62783982:+
136.067	4.84377	1.38669	3.49304	0.000477558	0.0118502	6.07075	ENSMUSG00000022973	17	Synj1	protein_coding	ensembl_havana	chr16:90936092-91011308:-
136.049	3.04996	1.47666	2.06545	0.0388807	0.146492	6.51356	ENSMUSG00000068587	9	Mgam	protein_coding	ensembl_havana	chr6:40628831-40769123:+
135.547	1.27466	1.46703	0.868876	0.384915	0.569097	6.07075	ENSMUSG00000027947	11	Il6ra	protein_coding	ensembl_havana	chr3:89864059-89913196:-
135.277	9.63298	2.39285	4.02573				ENSMUSG00000043311	7	D17H6S53E	protein_coding	ensembl_havana	chr17:35126373-35128855:+
134.88	1.32349	1.41352	0.936311	0.349113	0.520374	6.51356	ENSMUSG00000050335	16	Lgals3	protein_coding	ensembl_havana	chr14:47367751-47386160:+
134.682	-5.55715	1.98962	-2.79307				ENSMUSG00000040651	8	Fam208a	protein_coding	ensembl	chr14:27428847-27483552:+
134.667	4.04091	1.98157	2.03924	0.0414259	0.159018	6.07075	ENSMUSG00000039756	12	Dnttip2	protein_coding	ensembl_havana	chr3:122274388-122285271:+
134.65	0.25605	1.69741	0.150848	0.880096	0.827173	6.5981	ENSMUSG00000045636	16	Mtus1	protein_coding	ensembl_havana	chr8:40990914-41133726:-
134.257	-4.60592	1.42886	-3.22348	0.00126642	0.0201186	6.07075	ENSMUSG00000020143	15	Dock2	protein_coding	ensembl_havana	chr11:34226815-34783892:-
133.656	-0.744753	1.61799	-0.460294	0.645305	0.716802	6.5981	ENSMUSG00000075324	13	Fign	protein_coding	ensembl_havana	chr2:63971507-64098038:-
133.438	9.83163	2.46628	3.98642				ENSMUSG00000025916	10	Ppp1r42	protein_coding	ensembl_havana	chr1:9968624-10009136:-
133.189	-1.10721	1.22818	-0.901507	0.367319	0.506414	7.14632	ENSMUSG00000028530	14	Jak1	protein_coding	ensembl_havana	chr4:101152367-101265282:-
133.157	-2.63137	1.99932	-1.31613				ENSMUSG00000094858	3	Olfr1297	protein_coding	ensembl_havana	chr2:111615233-111626497:-
132.872	3.55516	1.80962	1.96458				ENSMUSG00000036985	12	Zdhhc9	protein_coding	ensembl_havana	chrX:48171969-48208878:-
132.779	4.25111	1.48319	2.86619	0.0041544	0.0395682	6.41147	ENSMUSG00000024002	16	Brd4	protein_coding	ensembl_havana	chr17:32196274-32284722:-
132.749	6.05306	1.95442	3.09712				ENSMUSG00000032911	6	Cspg4	protein_coding	ensembl_havana	chr9:56865033-56899870:+
132.527	-5.44109	1.89621	-2.86945	0.00411181	0.0393343	6.41147	ENSMUSG00000058251	3	Olfr822	protein_coding	ensembl_havana	chr10:130071210-130076909:+
132.502	3.11369	2.05844	1.51265				ENSMUSG00000019970	15	Sgk1	protein_coding	ensembl_havana	chr10:21882184-21999903:+
132.316	-1.90596	1.82721	-1.0431				ENSMUSG00000033792	12	Atp7a	protein_coding	ensembl_havana	chrX:106027276-106124926:+
132.011	7.95576	2.1736	3.66017				ENSMUSG00000021364	15	Elovl2	protein_coding	ensembl_havana	chr13:41182495-41220405:-
131.898	6.38977	2.06255	3.098				ENSMUSG00000090751	1	Vmn2r63	protein_coding	ensembl_havana	chr7:42903251-42933789:-
131.328	-1.25568	2.43821	-0.515002				ENSMUSG00000042348	9	Arl15	protein_coding	ensembl_havana	chr13:113794505-114157461:+
131.197	6.63011	2.0952	3.16443				ENSMUSG00000111869	1	Olfr342	protein_coding	ensembl_havana	chr2:36524998-36530790:+
130.963	-6.75231	1.57446	-4.28866	1.79753e-05	0.00207031	6.07075	ENSMUSG00000021693	19	Kif2a	protein_coding	ensembl_havana	chr13:106958996-107022126:-
130.819	5.35615	1.7013	3.14827	0.00164239	0.021118	7.14632	ENSMUSG00000062296	8	Trank1	protein_coding	ensembl_havana	chr9:111311739-111395775:+
130.539	-0.239736	1.33731	-0.179268	0.857728	0.827779	6.41147	ENSMUSG00000096054	3	Syne1	protein_coding	ensembl_havana	chr10:5020917-5551482:-
130.412	6.64535	2.29598	2.89435				ENSMUSG00000017221	14	Psmd3	protein_coding	ensembl_havana	chr11:98682554-98695979:+
130.351	1.99402	1.76612	1.12904				ENSMUSG00000064246	10	Chil1	protein_coding	ensembl_havana	chr1:134182176-134190181:+
129.865	5.45588	2.02491	2.69439				ENSMUSG00000031130	3	Brs3	protein_coding	ensembl_havana	chrX:57043074-57048758:+
129.69	-7.03615	2.17844	-3.2299				ENSMUSG00000053799	6	Exoc6	protein_coding	ensembl	chr19:37550418-37683245:+
129.522	1.39435	1.47515	0.945226	0.344544	0.485811	7.14632	ENSMUSG00000024921	17	Smarca2	protein_coding	ensembl_havana	chr19:26605050-26778322:+
129.468	3.39051	2.44749	1.3853				ENSMUSG00000033107	5	Rnf125	protein_coding	ensembl	chr18:20944625-20983848:+
129.444	4.11974	1.42615	2.88872				ENSMUSG00000020719	14	Ddx5	protein_coding	ensembl_havana	chr11:106780355-106789185:-
129.251	0.840752	1.45662	0.577195	0.563808	0.702018	6.07075	ENSMUSG00000078763	2	Slfn1	protein_coding	ensembl_havana	chr11:83116849-83122670:+
129.184	-0.614708	1.59757	-0.384777	0.700402	0.751791	6.41147	ENSMUSG00000022285	16	Ywhaz	protein_coding	ensembl_havana	chr15:36770770-36794547:-
128.991	3.41355	1.67729	2.03516				ENSMUSG00000020463	15	Smek2	protein_coding	ensembl_havana	chr11:29172890-29220797:+
128.891	1.67682	2.3927	0.700803				ENSMUSG00000073002	9	Vamp5	protein_coding	ensembl_havana	chr6:72368794-72380468:-
128.619	0.274232	1.58066	0.173492				ENSMUSG00000033228	7	Scaf11	protein_coding	ensembl	chr15:96411698-96460843:-
128.496	8.09791	2.48341	3.26081				ENSMUSG00000079436	3	Kcnj13	protein_coding	ensembl_havana	chr1:87386363-87394729:-
128.488	0.753277	1.23456	0.61016	0.541756	0.687569	6.07075	ENSMUSG00000020349	4	Ppp2ca	protein_coding	ensembl_havana	chr11:52098681-52127778:+
128.42	-6.56506	1.8486	-3.55136	0.000383245	0.0105487	6.5981	ENSMUSG00000019775	17	Rgs17	protein_coding	ensembl_havana	chr10:5825663-5922400:-
128.26	-1.43801	2.27417	-0.632326				ENSMUSG00000038671	15	Arfrp1	protein_coding	ensembl_havana	chr2:181357690-181365404:-
128.251	5.87568	2.08502	2.81804				ENSMUSG00000020572	7	Nampt	protein_coding	ensembl	chr12:32820335-32853369:+
128.19	-3.83683	1.67724	-2.28758	0.022162	0.100441	6.5981	ENSMUSG00000084957	2	Bbip1	protein_coding	ensembl	chr19:53929677-53944627:-
128.118	2.60201	1.56483	1.66281	0.0963502	0.252164	6.41147	ENSMUSG00000019820	9	Utrn	protein_coding	ensembl	chr10:12382188-12861735:-
128.104	3.71809	1.44099	2.58024	0.00987321	0.0680928	6.07075	ENSMUSG00000048120	16	Entpd1	protein_coding	ensembl_havana	chr19:40612366-40741602:+
128.084	4.04154	1.63006	2.47938	0.0131613	0.0774137	6.51356	ENSMUSG00000020641	15	Rsad2	protein_coding	ensembl_havana	chr12:26442753-26456452:-
128.014	6.3571	1.9104	3.32762				ENSMUSG00000052928	8	Ctif	protein_coding	ensembl	chr18:75431224-75697696:-
127.74	-2.53553	1.69446	-1.49636				ENSMUSG00000035493	9	Tgfbi	protein_coding	ensembl	chr13:56609603-56639339:+
127.633	1.31769	1.98703	0.663147	0.507236	0.607074	7.14632	ENSMUSG00000040747	9	Cd53	protein_coding	ensembl_havana	chr3:106759921-106790149:-
127.161	0.583976	0.99727	0.585575	0.558161	0.639761	7.14632	ENSMUSG00000004865	15	Srpk1	protein_coding	ensembl_havana	chr17:28587648-28622521:-
127.137	0.0998145	1.52669	0.0653796				ENSMUSG00000063077	14	Kif1b	protein_coding	ensembl_havana	chr4:149176319-149307693:-
126.983	1.46244	1.67895	0.871048	0.383728	0.542394	6.5981	ENSMUSG00000066684	10	Pilrb1	protein_coding	ensembl_havana	chr5:137852147-137858106:-
126.964	6.68784	2.0226	3.30655				ENSMUSG00000022305	12	Lrp12	protein_coding	ensembl_havana	chr15:39870603-39943994:-
126.819	-4.03402	1.91144	-2.11046	0.034819	0.136646	6.5981	ENSMUSG00000096497	2	Olfr787	protein_coding	ensembl_havana	chr10:129461862-129467485:+
126.537	6.24445	2.35427	2.65239				ENSMUSG00000042529	14	Kcnj12	protein_coding	ensembl_havana	chr11:61022564-61071131:+
126.394	6.42014	1.74763	3.67363				ENSMUSG00000022533	13	Atp13a3	protein_coding	ensembl_havana	chr16:30312423-30388837:-
126.387	2.94361	2.26078	1.30203				ENSMUSG00000064084	2	Olfr1202	protein_coding	ensembl_havana	chr2:88814496-88820711:+
126.058	1.68187	1.8494	0.909417				ENSMUSG00000090862	3	Rps13	protein_coding	ensembl_havana	chr7:116331505-116334195:-
125.987	5.026	1.66663	3.01567	0.00256414	0.029907	6.41147	ENSMUSG00000027678	17	Ncoa3	protein_coding	ensembl_havana	chr2:165992636-166073242:+
125.968	2.09401	2.59706	0.806299				ENSMUSG00000058981	4	Olfr1406	protein_coding	ensembl_havana	chr1:173181853-173190640:-
125.699	-2.66309	1.42122	-1.87381	0.0609569	0.181831	7.14632	ENSMUSG00000009292	17	Trpm2	protein_coding	ensembl_havana	chr10:77907722-77970563:-
125.627	0.813741	1.65516	0.491637	0.622976	0.712232	6.51356	ENSMUSG00000038212	15	Mfsd14b	protein_coding	ensembl_havana	chr13:65064663-65112982:-
125.376	7.56982	2.39457	3.16125				ENSMUSG00000014313	14	Cox6c	protein_coding	ensembl_havana	chr15:35925886-35938246:-
125.293	-0.645219	1.47992	-0.435982	0.66285	0.732485	6.41147	ENSMUSG00000042364	10	Snx18	protein_coding	ensembl	chr13:113592180-113618564:-
125.291	-8.98313	1.94631	-4.61547	3.92206e-06	0.00103905	6.5981	ENSMUSG00000064262	7	Gimap8	protein_coding	ensembl_havana	chr6:48647234-48660875:+
125.156	-1.3804	1.36405	-1.01198	0.311546	0.480561	6.5981	ENSMUSG00000030403	9	Vasp	protein_coding	ensembl_havana	chr7:19256929-19271817:-
125.095	-6.72438	1.95458	-3.44032				ENSMUSG00000075520	5	Malrd1	protein_coding	havana	chr2:15526479-16255555:+
125.077	-5.86624	1.64053	-3.57582				ENSMUSG00000033088	18	Triobp	protein_coding	ensembl_havana	chr15:78947724-79005867:+
124.951	0.351098	1.99574	0.175924				ENSMUSG00000029504	5	Ddx51	protein_coding	ensembl_havana	chr5:110653451-110660496:+
124.926	2.64956	1.5753	1.68194	0.0925802	0.241643	6.5981	ENSMUSG00000022488	8	Nckap1l	protein_coding	ensembl	chr15:103453825-103498800:+
124.903	4.51311	1.89383	2.38306				ENSMUSG00000064225	6	Paqr9	protein_coding	ensembl_havana	chr9:95559657-95568023:+
124.802	9.07818	2.22981	4.07129				ENSMUSG00000028889	17	Yrdc	protein_coding	ensembl_havana	chr4:124850679-124855242:+
124.541	5.25155	2.02104	2.59845	0.00936465	0.0640581	6.5981	ENSMUSG00000057219	11	Armc7	protein_coding	ensembl_havana	chr11:115475667-115490467:+
124.535	1.7075	2.35318	0.725614				ENSMUSG00000024516	12	Sec11c	protein_coding	ensembl_havana	chr18:65800549-65817665:+
124.511	4.29101	1.46896	2.92112	0.00348776	0.0375966	6.07075	ENSMUSG00000031488	14	Rab11fip1	protein_coding	ensembl_havana	chr8:27138773-27174646:-
124.206	4.54182	1.8027	2.51945	0.0117537	0.0684519	7.14632	ENSMUSG00000026104	14	Stat1	protein_coding	ensembl_havana	chr1:52119440-52161865:+
124.178	5.03537	1.56363	3.2203				ENSMUSG00000004798	14	Ulk2	protein_coding	ensembl_havana	chr11:61775649-61855073:-
124.161	4.48814	1.93488	2.3196				ENSMUSG00000050890	15	Pdik1l	protein_coding	ensembl_havana	chr4:134275002-134287895:-
124.13	1.85276	1.86621	0.992793				ENSMUSG00000003226	6	Ranbp2	protein_coding	ensembl	chr10:58446852-58494155:+
124.126	3.1841	1.45008	2.19581	0.0281056	0.119134	6.5981	ENSMUSG00000040838	10	Gm11639	protein_coding	havana	chr11:104685707-105117394:+
123.946	4.89163	1.80509	2.70992				ENSMUSG00000010277	7	2610507B11Rik	protein_coding	ensembl_havana	chr11:78261752-78290623:+
123.876	-8.07565	1.93664	-4.16993	3.04691e-05	0.00257584	6.07075	ENSMUSG00000037321	17	Tap1	protein_coding	ensembl_havana	chr17:34187553-34197225:+
123.838	2.82086	1.82055	1.54946				ENSMUSG00000022139	16	Mbnl2	protein_coding	ensembl	chr14:120275669-120431697:+
123.742	-8.26672	2.00621	-4.12056	3.77956e-05	0.00257584	6.51356	ENSMUSG00000049537	10	Tecrl	protein_coding	ensembl_havana	chr5:83278145-83355195:-
123.573	7.52343	2.25193	3.34088				ENSMUSG00000022052	8	Ppp2r2a	protein_coding	ensembl	chr14:67014057-67072471:-
123.342	9.04832	2.10294	4.3027	1.68728e-05	0.00204276	6.51356	ENSMUSG00000049573	3	Olfr780	protein_coding	ensembl_havana	chr10:129318117-129324141:+
123.303	-0.45546	1.51772	-0.300095	0.764105	0.802242	6.07075	ENSMUSG00000017631	18	Abr	protein_coding	ensembl_havana	chr11:76416734-76622314:-
123.202	-2.42353	1.74	-1.39283	0.16367	0.333938	6.41147	ENSMUSG00000021676	9	Iqgap2	protein_coding	ensembl	chr13:95627177-95891922:-
123.008	-2.30044	2.52252	-0.911958				ENSMUSG00000111715	1	Olfr1246	protein_coding	ensembl_havana	chr2:89586141-89593157:-
122.961	-0.273624	1.66672	-0.16417				ENSMUSG00000034724	17	Cnot6l	protein_coding	ensembl_havana	chr5:96070333-96164171:-
122.901	0.0849162	2.11234	0.0402001				ENSMUSG00000051910	13	Sox6	protein_coding	ensembl_havana	chr7:115470872-116038796:-
122.818	3.16136	2.04054	1.54928				ENSMUSG00000044106	4	Olfr868	protein_coding	ensembl_havana	chr9:20098626-20104754:+
122.55	3.86173	1.72983	2.23243	0.0255867	0.118311	6.07075	ENSMUSG00000066682	11	Pilrb2	protein_coding	ensembl_havana	chr5:137865827-137871815:-
122.535	5.70488	1.72546	3.3063				ENSMUSG00000040462	12	Os9	protein_coding	ensembl	chr10:127094259-127121160:-
122.526	-2.45524	1.69074	-1.45217	0.146455	0.312085	6.5981	ENSMUSG00000045679	13	Pqlc3	protein_coding	ensembl_havana	chr12:16988648-17000408:-
122.226	2.04063	1.0713	1.90482	0.0568031	0.184604	6.41147	ENSMUSG00000028465	16	Tln1	protein_coding	ensembl_havana	chr4:43531519-43562691:-
122.209	5.09236	1.74396	2.92				ENSMUSG00000042772	15	Smg7	protein_coding	ensembl_havana	chr1:152836995-152902646:-
122.133	-2.20332	1.53517	-1.43522	0.151224	0.330781	6.07075	ENSMUSG00000030760	14	Acer3	protein_coding	ensembl_havana	chr7:98206389-98321208:-
122.056	6.17977	2.18028	2.8344				ENSMUSG00000010607	8	Pigyl	protein_coding	ensembl_havana	chr9:22156846-22158358:+
121.918	-5.15069	1.54943	-3.32425				ENSMUSG00000049100	15	Pcdh10	protein_coding	ensembl_havana	chr3:45378398-45435623:+
121.886	4.49562	1.95946	2.29432				ENSMUSG00000045515	3	Pou3f3	protein_coding	ensembl_havana	chr1:42695768-42703176:+
121.777	5.01956	1.92897	2.6022				ENSMUSG00000040430	18	Pitpnc1	protein_coding	ensembl_havana	chr11:107207892-107470699:-
121.744	-2.53728	2.09848	-1.20911				ENSMUSG00000056602	11	Fry	protein_coding	ensembl_havana	chr5:150118645-150497753:+
121.735	6.6396	2.24439	2.9583				ENSMUSG00000074448	2	Gm5615	protein_coding	ensembl_havana	chr9:36532397-36541963:-
121.578	-7.75737	2.06357	-3.7592				ENSMUSG00000032122	15	Slc37a2	protein_coding	ensembl_havana	chr9:37227585-37255738:-
121.489	4.97297	1.8092	2.74872				ENSMUSG00000052253	5	Zfp622	protein_coding	ensembl	chr15:25984366-25998482:+
121.094	-3.06885	1.68237	-1.82412	0.0681333	0.201773	6.5981	ENSMUSG00000095028	6	Sirpb1b	protein_coding	ensembl_havana	chr3:15495751-15575065:-
121.015	-8.54403	2.37337	-3.59996				ENSMUSG00000025645	8	Ccdc51	protein_coding	ensembl_havana	chr9:109082493-109092489:+
120.465	5.14759	1.55748	3.30506	0.000949545	0.0166544	6.5981	ENSMUSG00000002963	17	Pnkp	protein_coding	ensembl_havana	chr7:44857139-44862992:+
120.383	-2.86154	1.50258	-1.90442	0.0568556	0.183412	6.51356	ENSMUSG00000032253	13	Phip	protein_coding	ensembl_havana	chr9:82866159-82975516:-
120.363	2.02918	1.30135	1.55929	0.118928	0.265966	7.14632	ENSMUSG00000058600	13	Rpl30	protein_coding	ensembl_havana	chr15:34440505-34443640:-
120.336	3.43973	1.32295	2.60005	0.00932111	0.064336	6.41147	ENSMUSG00000055024	12	Ep300	protein_coding	ensembl_havana	chr15:81585351-81652077:+
120.322	2.40255	1.57042	1.52987				ENSMUSG00000041408	16	Wapl	protein_coding	ensembl_havana	chr14:34673928-34747983:+
120.139	1.6001	1.8223	0.87807				ENSMUSG00000075700	9	Selenot	protein_coding	ensembl_havana	chr3:58576636-58593133:+
120.008	0.665618	1.51365	0.439744	0.660123	0.749431	6.07075	ENSMUSG00000027566	14	Psma7	protein_coding	ensembl_havana	chr2:180036373-180042433:-
119.99	-2.39408	1.67042	-1.43322	0.151795	0.323634	6.41147	ENSMUSG00000047045	17	Tmem164	protein_coding	ensembl_havana	chrX:142681406-142843494:+
119.708	-1.34173	1.1095	-1.20931	0.226543	0.405251	6.41147	ENSMUSG00000060019	5	Gm10073	protein_coding	ensembl	chr8:106572966-106573461:-
119.68	-1.65218	1.98	-0.834435				ENSMUSG00000000628	10	Hk2	protein_coding	ensembl_havana	chr6:82725025-82774454:-
119.638	5.1299	1.95471	2.62439	0.00868053	0.0640581	6.07075	ENSMUSG00000028800	15	Hdac1	protein_coding	ensembl_havana	chr4:129516104-129542713:-
119.632	5.85553	1.81333	3.22916				ENSMUSG00000028854	9	Slc9a1	protein_coding	ensembl_havana	chr4:133369706-133423702:+
119.564	0.317817	1.97184	0.161178				ENSMUSG00000059439	15	Bcas3	protein_coding	ensembl_havana	chr11:85353167-85826058:+
119.53	-0.409667	1.56303	-0.262098	0.793246	0.784876	6.5981	ENSMUSG00000034610	14	Zcchc11	protein_coding	ensembl_havana	chr4:108459426-108559421:+
119.085	7.05327	2.13675	3.30094				ENSMUSG00000038633	5	Degs1	protein_coding	ensembl_havana	chr1:182275772-182282804:-
118.804	-1.51056	1.71221	-0.882228	0.377654	0.538626	6.5981	ENSMUSG00000038844	9	Kif16b	protein_coding	ensembl_havana	chr2:142617474-142901531:-
118.785	0.735108	2.40554	0.305589				ENSMUSG00000094347	2	Olfr784	protein_coding	ensembl_havana	chr10:129384083-129390198:+
118.525	-1.52573	1.79131	-0.851738				ENSMUSG00000031425	15	Plp1	protein_coding	ensembl_havana	chrX:136822671-136839733:+
118.501	-2.97809	1.86419	-1.59753				ENSMUSG00000022558	15	Mroh1	protein_coding	ensembl_havana	chr15:76380261-76453038:+
118.498	-5.43738	1.7787	-3.05695				ENSMUSG00000034998	18	Foxn2	protein_coding	ensembl_havana	chr17:88440711-88490533:+
118.367	0.0354601	1.53208	0.0231451	0.981535	0.92853	6.07075	ENSMUSG00000035722	15	Abca7	protein_coding	ensembl_havana	chr10:79996494-80015572:+
118.179	1.27415	1.7841	0.71417	0.475122	0.612125	6.5981	ENSMUSG00000026234	12	Ncl	protein_coding	ensembl_havana	chr1:86344719-86359400:-
118.05	4.41586	1.48417	2.9753	0.00292699	0.0330507	6.07075	ENSMUSG00000025757	12	Hspa4l	protein_coding	ensembl_havana	chr3:40744495-40796103:+
117.976	-2.03084	1.80357	-1.12601				ENSMUSG00000046062	5	Ppp1r15b	protein_coding	ensembl_havana	chr1:133131143-133139783:+
117.688	6.04385	2.01633	2.99745				ENSMUSG00000032477	13	Cdc25a	protein_coding	ensembl_havana	chr9:109875579-109893895:+
117.653	-5.18537	1.8871	-2.74779				ENSMUSG00000030816	8	Rnf40	protein_coding	ensembl_havana	chr7:127588767-127604799:+
117.612	-1.43471	1.96071	-0.73173				ENSMUSG00000024937	14	Ehbp1l1	protein_coding	ensembl	chr19:5707376-5726317:-
117.602	-3.44674	1.73067	-1.99157				ENSMUSG00000026834	13	Acvr1c	protein_coding	ensembl_havana	chr2:58267453-58357895:-
117.597	-6.31441	1.57228	-4.01608	5.91751e-05	0.00311169	6.51356	ENSMUSG00000063564	13	Col23a1	protein_coding	ensembl_havana	chr11:51289920-51583918:+
117.234	5.20991	1.73626	3.00065				ENSMUSG00000037646	9	Vps13b	protein_coding	ensembl	chr15:35371546-35931228:+
117.09	-1.246	2.113	-0.589682	0.555404	0.696448	6.07075	ENSMUSG00000028893	8	Sesn2	protein_coding	ensembl_havana	chr4:132492032-132510501:-
117.09	-6.38869	2.35179	-2.71653				ENSMUSG00000029060	17	Mib2	protein_coding	ensembl_havana	chr4:155654677-155669198:-
117.068	4.43043	2.2124	2.00255				ENSMUSG00000059142	15	Zfp945	protein_coding	ensembl_havana	chr17:22846697-22867134:-
117.009	-2.98413	1.74292	-1.71214				ENSMUSG00000022262	7	Dnah5	protein_coding	ensembl_havana	chr15:28203752-28472045:+
116.879	1.67263	1.37897	1.21296	0.225146	0.404834	6.41147	ENSMUSG00000035569	17	Ankrd11	protein_coding	ensembl_havana	chr8:122883822-123042277:-
116.59	-3.69336	1.78994	-2.06339	0.0390753	0.148221	6.41147	ENSMUSG00000037731	5	Themis2	protein_coding	ensembl_havana	chr4:132781843-132796387:-
116.548	-6.08407	2.18568	-2.7836				ENSMUSG00000034484	7	Snx2	protein_coding	ensembl	chr18:53176365-53220860:+
116.371	-0.881372	1.5776	-0.558679	0.576381	0.679411	6.5981	ENSMUSG00000026068	11	Il18rap	protein_coding	ensembl_havana	chr1:40515362-40551705:+
116.358	0.425368	1.17745	0.361263	0.717903	0.779318	6.07075	ENSMUSG00000031328	15	Flna	protein_coding	ensembl_havana	chrX:74223461-74249820:-
116.199	0.949584	2.05405	0.462299				ENSMUSG00000025262	8	Fam120c	protein_coding	ensembl_havana	chrX:151344175-151471842:+
115.799	-6.49485	1.85716	-3.4972				ENSMUSG00000044496	6	2510039O18Rik	protein_coding	ensembl_havana	chr4:147940895-147947314:+
115.724	4.93363	1.56375	3.155				ENSMUSG00000045071	13	E130308A19Rik	protein_coding	ensembl_havana	chr4:59626211-59761439:+
115.625	3.07598	1.74731	1.76041				ENSMUSG00000024795	10	Kif20b	protein_coding	ensembl	chr19:34922358-34975731:+
115.113	3.10501	1.64389	1.88881				ENSMUSG00000004446	12	Bid	protein_coding	ensembl_havana	chr6:120891930-120916853:-
115.096	2.19417	2.2174	0.989521				ENSMUSG00000053347	14	Zfp943	protein_coding	ensembl_havana	chr17:21962552-22071168:+
114.976	-5.51905	1.55429	-3.55085				ENSMUSG00000016150	15	Tenm1	protein_coding	ensembl_havana	chrX:42527866-43429126:-
114.856	-2.85009	2.06135	-1.38263	0.166778	0.3365	6.41147	ENSMUSG00000059900	14	Tmem40	protein_coding	ensembl_havana	chr6:115729131-115762410:-
114.805	3.6787	1.74337	2.11011				ENSMUSG00000028152	10	Tspan5	protein_coding	ensembl_havana	chr3:138742195-138907905:+
114.794	-3.84892	1.521	-2.53052	0.0113894	0.0724235	6.41147	ENSMUSG00000040699	13	Limd2	protein_coding	ensembl_havana	chr11:106156256-106160860:-
114.75	2.48572	1.5175	1.63803				ENSMUSG00000075415	13	Fnbp1	protein_coding	ensembl_havana	chr2:31026206-31142008:-
114.535	5.97232	1.73423	3.4438				ENSMUSG00000056537	11	Rlim	protein_coding	ensembl_havana	chrX:103957163-103981284:-
114.516	5.9451	2.24495	2.64821				ENSMUSG00000030492	16	Slc7a9	protein_coding	ensembl_havana	chr7:35448796-35466036:+
114.498	0.814606	1.65799	0.49132	0.6232	0.679411	7.14632	ENSMUSG00000034152	5	Exoc3	protein_coding	ensembl	chr13:74169805-74208700:-
114.395	-6.64545	1.8952	-3.50646				ENSMUSG00000014907	10	Naf1	protein_coding	ensembl_havana	chr8:66860217-66890564:+
114.364	2.47128	1.73329	1.42577	0.153934	0.325333	6.41147	ENSMUSG00000038327	8	Serpinb9f	protein_coding	ensembl_havana	chr13:33324077-33335370:+
114.194	7.72588	2.21989	3.4803				ENSMUSG00000074802	10	Gas2l3	protein_coding	ensembl	chr10:89408823-89443967:-
113.85	5.08856	1.88267	2.70285				ENSMUSG00000029516	19	Cit	protein_coding	ensembl_havana	chr5:115845278-116008947:+
113.638	6.91531	2.23954	3.08782				ENSMUSG00000047022	18	Mipol1	protein_coding	ensembl_havana	chr12:57230427-57497199:+
113.508	1.09204	2.23202	0.489263				ENSMUSG00000033439	12	Trmt13	protein_coding	ensembl_havana	chr3:116581093-116614587:-
113.373	-6.09323	1.89842	-3.20964				ENSMUSG00000032776	9	Mctp2	protein_coding	ensembl_havana	chr7:72077830-72306608:-
113.031	0.0592761	1.75557	0.0337646				ENSMUSG00000039801	6	2410089E03Rik	protein_coding	ensembl_havana	chr15:8169106-8271158:+
112.938	8.02465	2.41424	3.32388				ENSMUSG00000031085	16	Gm498	protein_coding	ensembl_havana	chr7:143866838-143900046:+
112.831	4.7934	1.69084	2.83493				ENSMUSG00000036246	14	Gmip	protein_coding	ensembl_havana	chr8:69808679-69821870:+
112.763	0.000217444	1.97023	0.000110365				ENSMUSG00000040929	16	Rfx3	protein_coding	ensembl_havana	chr19:27761721-28011166:-
112.657	2.40326	1.69678	1.41636				ENSMUSG00000050379	15	Sept6	protein_coding	ensembl_havana	chrX:36911326-36991794:-
112.343	1.59698	1.56119	1.02293				ENSMUSG00000030096	8	Slc6a6	protein_coding	ensembl_havana	chr6:91684053-91759066:+
112.193	4.05526	1.75328	2.31295				ENSMUSG00000005371	14	Fbxo11	protein_coding	ensembl_havana	chr17:87990859-88065291:-
112.103	8.0112	2.22886	3.5943				ENSMUSG00000044162	12	Tnip3	protein_coding	ensembl_havana	chr6:65525313-65634040:+
112.07	1.72215	1.53248	1.12377	0.26111	0.438756	6.41147	ENSMUSG00000036427	5	Gpi1	protein_coding	ensembl_havana	chr7:34201330-34230336:-
112.059	5.803	2.1332	2.72032				ENSMUSG00000035967	15	Ints6l	protein_coding	ensembl_havana	chrX:56454857-56507843:+
111.98	-1.95403	2.29124	-0.852829				ENSMUSG00000038425	17	Poli	protein_coding	ensembl_havana	chr18:70508680-70530620:-
111.916	0.0150054	0.887127	0.0169146	0.986505	0.842236	7.14632	ENSMUSG00000060336	6	Zfp937	protein_coding	ensembl_havana	chr2:150218073-150240725:+
111.914	0.185697	2.02443	0.0917277				ENSMUSG00000027075	16	Slc43a1	protein_coding	ensembl_havana	chr2:84838850-84863594:+
111.57	5.50889	1.92941	2.85522	0.00430069	0.0397982	6.51356	ENSMUSG00000028645	11	Slc2a1	protein_coding	ensembl_havana	chr4:119108711-119137983:+
111.51	0.870146	1.10784	0.785444	0.432193	0.589526	6.41147	ENSMUSG00000029254	16	Stap1	protein_coding	ensembl_havana	chr5:86071746-86106125:+
111.425	-1.02239	1.68229	-0.607733				ENSMUSG00000029135	10	Fosl2	protein_coding	ensembl_havana	chr5:32135801-32157842:+
111.397	6.34829	2.00127	3.17213				ENSMUSG00000024481	4	Lvrn	protein_coding	ensembl	chr18:46850039-46905446:+
111.388	5.17957	1.80319	2.87245				ENSMUSG00000032194	9	Kank2	protein_coding	ensembl_havana	chr9:21766784-21798744:-
111.387	2.407	1.71309	1.40506				ENSMUSG00000029366	10	Dck	protein_coding	ensembl_havana	chr5:88764996-88783281:+
111.157	-1.08246	2.04105	-0.530343				ENSMUSG00000027068	6	Dhrs9	protein_coding	ensembl_havana	chr2:69380445-69404533:+
110.745	4.47199	1.67423	2.67107				ENSMUSG00000055435	6	Maf	protein_coding	ensembl_havana	chr8:115682942-115707794:-
110.734	-4.43348	1.66614	-2.66093	0.0077926	0.0581536	6.5981	ENSMUSG00000028603	15	Scp2	protein_coding	ensembl_havana	chr4:108043839-108144998:-
110.623	-4.07401	1.90318	-2.14064				ENSMUSG00000022965	7	Ifngr2	protein_coding	ensembl_havana	chr16:91547072-91565169:+
110.436	6.34853	2.13435	2.97445				ENSMUSG00000045319	13	Proser2	protein_coding	ensembl_havana	chr2:6097607-6130211:-
110.404	8.82102	2.57619	3.42406				ENSMUSG00000051046	7	Olfr214	protein_coding	ensembl_havana	chr6:116554235-116560611:+
110.39	4.94679	1.78505	2.77123				ENSMUSG00000040061	17	Plcb2	protein_coding	ensembl_havana	chr2:118707517-118728438:-
110.306	6.00917	1.46803	4.09337	4.25155e-05	0.00257584	6.41147	ENSMUSG00000024456	16	Diaph1	protein_coding	ensembl_havana	chr18:37843601-37935476:-
110.261	6.85805	2.1195	3.2357				ENSMUSG00000035270	15	Impg2	protein_coding	ensembl_havana	chr16:56204313-56273756:+
110.247	3.58157	1.34348	2.66588	0.00767871	0.0575062	6.5981	ENSMUSG00000038145	17	Snrk	protein_coding	ensembl_havana	chr9:122117266-122169702:+
110.165	0.92559	1.67991	0.550975	0.581651	0.712232	6.07075	ENSMUSG00000026275	13	Ppp1r7	protein_coding	ensembl_havana	chr1:93342854-93373489:+
109.86	8.84585	2.81479	3.14263				ENSMUSG00000043832	13	Clec4a3	protein_coding	ensembl_havana	chr6:122952515-122969875:+
109.84	-6.11336	1.71742	-3.55962				ENSMUSG00000028999	15	Rint1	protein_coding	ensembl_havana	chr5:23787711-23820369:+
109.663	-7.55257	2.1937	-3.44285				ENSMUSG00000030751	18	Psma1	protein_coding	ensembl_havana	chr7:114264606-114276118:-
109.452	-0.722871	1.86935	-0.386696	0.698982	0.770755	6.07075	ENSMUSG00000034892	8	Rps29	protein_coding	ensembl_havana	chr12:69157722-69159186:-
109.334	-4.44812	1.74535	-2.54856				ENSMUSG00000037638	5	Zbtb42	protein_coding	ensembl_havana	chr12:112678828-112682747:+
109.087	-3.58524	1.55707	-2.30256	0.0213034	0.102662	6.07075	ENSMUSG00000061143	15	Maml3	protein_coding	ensembl_havana	chr3:51685907-52105076:-
109.056	3.91628	1.36588	2.86722	0.00414101	0.0391646	6.51356	ENSMUSG00000038664	16	Herc1	protein_coding	ensembl_havana	chr9:66350450-66508775:+
108.677	1.99167	1.56587	1.27192	0.2034	0.393445	6.07075	ENSMUSG00000026743	16	Mllt10	protein_coding	ensembl_havana	chr2:18055237-18212388:+
108.467	2.8813	1.87432	1.53725				ENSMUSG00000002325	14	Irf9	protein_coding	ensembl_havana	chr14:55603571-55610030:+
108.385	-6.28375	2.18559	-2.87508				ENSMUSG00000037022	3	Mmaa	protein_coding	ensembl_havana	chr8:79263598-79294937:-
108.37	-3.04342	2.66622	-1.14147				ENSMUSG00000022677	14	Fopnl	protein_coding	ensembl_havana	chr16:14299244-14317375:-
108.209	-2.24176	1.40755	-1.59267	0.111234	0.2673	6.5981	ENSMUSG00000034889	7	Cactin	protein_coding	ensembl	chr10:81321103-81326251:+
108.026	-0.342936	0.887856	-0.386252	0.69931	0.751177	6.41147	ENSMUSG00000073411	11	H2-D1	protein_coding	ensembl_havana	chr17:35262730-35267499:+
107.806	0.574981	1.46326	0.392944	0.694361	0.737288	6.5981	ENSMUSG00000026219	14	Trip12	protein_coding	ensembl_havana	chr1:84721189-84840516:-
107.506	1.29432	1.72377	0.750864	0.452734	0.569097	7.14632	ENSMUSG00000020700	11	Map3k3	protein_coding	ensembl_havana	chr11:106084613-106155446:+
107.5	-0.299925	1.55061	-0.193424	0.846627	0.779318	7.14632	ENSMUSG00000058126	6	Tpm3-rs7	protein_coding	ensembl	chr14:113314608-113316713:+
107.473	-2.20459	1.90836	-1.15523	0.247997	0.42256	6.51356	ENSMUSG00000032409	15	Atr	protein_coding	ensembl_havana	chr9:95857597-95951781:+
107.398	-6.92404	1.55645	-4.4486	8.64304e-06	0.00184435	6.41147	ENSMUSG00000034243	16	Golgb1	protein_coding	ensembl_havana	chr16:36875140-36933085:+
107.386	3.7842	1.81322	2.08701				ENSMUSG00000038807	18	Rap1gap2	protein_coding	ensembl_havana	chr11:74383356-74610915:-
107.211	0.549457	1.93239	0.284341	0.776149	0.787739	6.41147	ENSMUSG00000040473	15	Cfap69	protein_coding	ensembl_havana	chr5:5579278-5664239:-
106.718	5.2819	1.89002	2.79462				ENSMUSG00000037953	7	A4gnt	protein_coding	ensembl_havana	chr9:99612502-99622367:+
106.454	-0.706247	1.63829	-0.431087	0.666405	0.753625	6.07075	ENSMUSG00000038717	8	Atp5l	protein_coding	ensembl_havana	chr9:44912557-44920742:-
106.441	4.19241	1.78495	2.34875	0.0188366	0.0932765	6.5981	ENSMUSG00000020024	6	Cep83	protein_coding	ensembl	chr10:94688790-94790336:+
106.423	5.4462	2.07962	2.61884	0.00882296	0.0625151	6.51356	ENSMUSG00000027692	16	Tnik	protein_coding	ensembl_havana	chr3:28263214-28675858:+
106.039	3.79254	2.24057	1.69267				ENSMUSG00000022193	6	Psmb5	protein_coding	ensembl	chr14:54614120-54617995:-
105.995	-0.840885	1.46153	-0.575344	0.565058	0.703196	6.07075	ENSMUSG00000025958	14	Creb1	protein_coding	ensembl_havana	chr1:64532645-64604548:+
105.891	6.34749	1.84295	3.4442	0.000572753	0.0123274	6.51356	ENSMUSG00000004789	9	Dlst	protein_coding	ensembl	chr12:85110833-85134091:+
105.776	3.30657	1.36061	2.43021	0.0150901	0.0854883	6.41147	ENSMUSG00000022781	8	Pak2	protein_coding	ensembl_havana	chr16:32016290-32079342:-
105.657	2.11646	1.46396	1.44571	0.148259	0.313905	6.5981	ENSMUSG00000048170	14	Mcmbp	protein_coding	ensembl_havana	chr7:128696441-128740495:-
105.553	1.3675	2.08699	0.65525				ENSMUSG00000009035	13	Tmem184b	protein_coding	ensembl	chr15:79360684-79403303:-
105.553	4.51604	1.51917	2.97271	0.00295181	0.0321689	6.51356	ENSMUSG00000020823	16	Sec14l1	protein_coding	ensembl_havana	chr11:117115168-117159268:+
105.551	6.51642	2.44348	2.66686				ENSMUSG00000025868	6	Higd2a	protein_coding	ensembl_havana	chr13:54590207-54591158:+
105.504	-7.43316	1.77354	-4.19115				ENSMUSG00000058298	7	Mcm9	protein_coding	ensembl	chr10:53536329-53630439:-
105.48	-3.31132	2.25246	-1.47009	0.141537	0.294953	7.14632	ENSMUSG00000079197	10	Psme2	protein_coding	ensembl_havana	chr14:55587441-55591113:-
105.401	-1.92417	1.44744	-1.32936	0.183731	0.335379	7.14632	ENSMUSG00000026728	9	Vim	protein_coding	ensembl_havana	chr2:13573927-13582826:+
105.394	5.33377	1.73908	3.06701	0.00216212	0.0275163	6.07075	ENSMUSG00000033777	3	Tlr13	protein_coding	ensembl_havana	chrX:106143204-106160493:+
105.372	-5.40677	1.56097	-3.46373	0.000532733	0.0118502	6.5981	ENSMUSG00000015882	17	Lcorl	protein_coding	ensembl_havana	chr5:45697181-45857615:-
105.364	7.06354	2.63081	2.68493				ENSMUSG00000094669	3	Olfr441	protein_coding	ensembl_havana	chr6:43106369-43117803:+
105.157	-0.869326	1.98635	-0.43765				ENSMUSG00000026312	17	Cdh7	protein_coding	ensembl_havana	chr1:109982431-110140157:+
105.15	3.55186	1.96281	1.80958	0.070361	0.206364	6.51356	ENSMUSG00000024091	8	Vapa	protein_coding	ensembl	chr17:65580056-65613555:-
105.041	5.65495	1.85083	3.05535				ENSMUSG00000049583	15	Grm5	protein_coding	ensembl_havana	chr7:87584168-88134907:+
104.938	1.54307	1.88283	0.819545				ENSMUSG00000095115	2	Itpripl2	protein_coding	ensembl_havana	chr7:118485111-118491975:-
104.793	0.696538	1.44251	0.482865	0.629192	0.718494	6.41147	ENSMUSG00000027808	8	Serp1	protein_coding	ensembl_havana	chr3:58519817-58525892:-
104.739	4.78634	2.03557	2.35134				ENSMUSG00000026174	9	Cnot9	protein_coding	ensembl_havana	chr1:74506058-74530842:+
104.601	-6.37963	2.19569	-2.90552				ENSMUSG00000040952	16	Rps19	protein_coding	ensembl_havana	chr7:24884371-24889806:+
104.507	3.15708	1.47773	2.13644	0.0326435	0.13178	6.5981	ENSMUSG00000022514	14	Il1rap	protein_coding	ensembl_havana	chr16:26581704-26730117:+
104.425	5.04874	1.85965	2.71489				ENSMUSG00000030491	16	Tdrd12	protein_coding	ensembl_havana	chr7:35469098-35537745:-
104.418	-0.398294	1.55223	-0.256595	0.797491	0.792514	6.51356	ENSMUSG00000028788	14	Ptp4a2	protein_coding	ensembl_havana	chr4:129811219-129850003:+
104.304	5.25999	1.82494	2.88228				ENSMUSG00000036391	16	Sec24a	protein_coding	ensembl_havana	chr11:51692264-51763634:-
104.289	0.016274	1.81979	0.00894282				ENSMUSG00000027878	11	Notch2	protein_coding	ensembl_havana	chr3:98013527-98150361:+
104.19	6.19745	2.08753	2.96879				ENSMUSG00000022897	14	Dyrk1a	protein_coding	ensembl_havana	chr16:94570010-94695517:+
104.148	-3.95895	1.54132	-2.56855	0.0102126	0.0663941	6.5981	ENSMUSG00000034120	18	Srsf2	protein_coding	ensembl_havana	chr11:116849901-116853094:-
103.913	2.10201	1.70189	1.2351	0.216791	0.389906	6.5981	ENSMUSG00000050732	9	Vamp8	protein_coding	ensembl_havana	chr6:72385223-72390703:-
103.837	5.45235	2.00611	2.71788				ENSMUSG00000021549	13	Rasa1	protein_coding	ensembl_havana	chr13:85214780-85289029:-
103.831	-1.6596	1.66057	-0.999415	0.317594	0.511593	6.07075	ENSMUSG00000020064	8	Herc4	protein_coding	ensembl	chr10:63243797-63317881:+
103.82	-5.04888	1.75562	-2.87584				ENSMUSG00000040488	17	Ltbp4	protein_coding	ensembl_havana	chr7:27305136-27337692:-
103.795	9.27616	2.78598	3.32959				ENSMUSG00000091528	8	Gm9268	protein_coding	ensembl_havana	chr7:43018798-43048106:+
103.745	-0.0941194	1.63129	-0.0576965	0.95399	0.86593	6.51356	ENSMUSG00000024164	15	C3	protein_coding	ensembl_havana	chr17:57203970-57228136:-
103.692	-5.31833	1.7315	-3.07153				ENSMUSG00000015653	13	Steap2	protein_coding	ensembl_havana	chr5:5664829-5694578:-
103.363	-7.79789	1.93191	-4.03636				ENSMUSG00000004948	12	Zp3	protein_coding	ensembl_havana	chr5:135980099-135988624:+
103.218	-0.312161	2.52914	-0.123426				ENSMUSG00000012848	15	Rps5	protein_coding	ensembl_havana	chr7:12922290-12926686:+
102.935	2.96146	1.24953	2.37007	0.0177849	0.0909106	6.51356	ENSMUSG00000047798	15	Cd300lf	protein_coding	ensembl_havana	chr11:115116214-115133992:-
102.929	-7.12118	1.74673	-4.07687	4.5647e-05	0.00261471	6.5981	ENSMUSG00000039168	15	Dap	protein_coding	ensembl_havana	chr15:31224314-31274341:+
102.717	-8.64832	2.17707	-3.97246				ENSMUSG00000019738	15	Polr2i	protein_coding	ensembl_havana	chr7:30231948-30233390:+
102.57	8.06749	2.43129	3.3182				ENSMUSG00000031570	17	Plpp5	protein_coding	ensembl_havana	chr8:25720037-25724887:+
102.495	-1.141	1.73274	-0.658495	0.51022	0.640957	6.51356	ENSMUSG00000023944	14	Hsp90ab1	protein_coding	ensembl_havana	chr17:45567775-45573271:-
102.408	6.38307	2.00172	3.1888	0.00142864	0.0198269	7.14632	ENSMUSG00000020737	12	Hn1	protein_coding	ensembl_havana	chr11:115497353-115514387:-
102.144	0.408058	1.10113	0.370583	0.710948	0.745927	6.5981	ENSMUSG00000022048	8	Dpysl2	protein_coding	ensembl_havana	chr14:66802864-66868688:-
101.87	4.46767	2.1273	2.10016				ENSMUSG00000005362	14	Crbn	protein_coding	ensembl_havana	chr6:106780201-106800077:-
101.866	-1.97321	1.41942	-1.39015	0.164483	0.345386	6.07075	ENSMUSG00000043535	13	Setx	protein_coding	ensembl_havana	chr2:29124181-29182471:+
101.742	2.15541	1.48845	1.44809	0.147592	0.313702	6.5981	ENSMUSG00000040710	10	St8sia4	protein_coding	ensembl_havana	chr1:95587682-95667571:-
101.711	-3.65028	1.49166	-2.44713	0.0144	0.0818211	6.5981	ENSMUSG00000095788	6	Sirpb1a	protein_coding	ensembl_havana	chr3:15371653-15426520:-
101.484	-6.91104	2.20392	-3.1358				ENSMUSG00000051557	15	Pusl1	protein_coding	ensembl_havana	chr4:155887879-155891781:-
101.44	-3.28646	2.07933	-1.58054				ENSMUSG00000042444	10	Fam63b	protein_coding	ensembl_havana	chr9:70599014-70657174:-
101.38	2.61967	1.9322	1.3558				ENSMUSG00000032235	15	Ice2	protein_coding	ensembl_havana	chr9:69397906-69433122:+
101.364	6.07215	2.23373	2.71839				ENSMUSG00000054360	4	Bsx	protein_coding	ensembl_havana	chr9:40874127-40880057:+
101.345	3.78373	2.2987	1.64603				ENSMUSG00000032878	16	Ccdc85a	protein_coding	ensembl_havana	chr11:28385685-28584324:-
101.14	1.97933	1.65827	1.19361				ENSMUSG00000028842	15	Ago3	protein_coding	ensembl_havana	chr4:126331704-126429556:-
101.015	5.12313	1.42402	3.59766	0.000321097	0.00986397	6.41147	ENSMUSG00000039585	15	Myo9a	protein_coding	ensembl_havana	chr9:59750896-59928866:+
100.906	-1.20284	1.31595	-0.914047	0.360692	0.526011	6.5981	ENSMUSG00000094483	2	Purb	protein_coding	ensembl_havana	chr11:6467599-6475917:-
100.433	-9.15479	2.21807	-4.12736				ENSMUSG00000026766	16	Mmadhc	protein_coding	ensembl_havana	chr2:50279881-50296801:-
100.376	1.2201	1.39748	0.873068	0.382626	0.567879	6.07075	ENSMUSG00000021892	14	Sh3bp5	protein_coding	ensembl_havana	chr14:31359880-31436078:-
100.274	6.34605	1.93434	3.28073				ENSMUSG00000033721	16	Vav3	protein_coding	ensembl_havana	chr3:109340653-109685698:+
100.264	5.92362	1.92203	3.08196				ENSMUSG00000028064	17	Sema4a	protein_coding	ensembl_havana	chr3:88435959-88461182:-
100.258	6.12153	2.0014	3.05862	0.00222358	0.0250832	7.14632	ENSMUSG00000035783	8	Acta2	protein_coding	ensembl	chr19:34241090-34255336:-
100.163	-1.49163	2.18275	-0.683373				ENSMUSG00000078348	4	Sf3b5	protein_coding	ensembl_havana	chr10:13005343-13009183:+
100.136	1.23863	1.75282	0.70665				ENSMUSG00000037260	8	Hgsnat	protein_coding	ensembl_havana	chr8:25944453-25976753:-
99.882	6.32024	1.76824	3.57431				ENSMUSG00000028211	11	Trp53inp1	protein_coding	ensembl_havana	chr4:11156431-11174379:+
99.8725	5.4992	1.59839	3.44046	0.000580735	0.0118502	7.14632	ENSMUSG00000024590	8	Lmnb1	protein_coding	ensembl_havana	chr18:56707813-56753424:+
99.4995	0.638292	1.92087	0.332293	0.739668	0.79064	6.07075	ENSMUSG00000060143	6	Gm10076	protein_coding	ensembl	chr14:105681828-105682211:+
99.4339	-2.62983	1.42616	-1.84399	0.0651841	0.198502	6.51356	ENSMUSG00000025808	17	Ccdc7a	protein_coding	ensembl_havana	chr8:128734235-129065517:-
99.1787	3.64711	1.67409	2.17856	0.0293642	0.124361	6.41147	ENSMUSG00000005142	10	Man2b1	protein_coding	ensembl_havana	chr8:85083270-85098282:+
98.9981	-1.0149	1.57621	-0.643884	0.51965	0.674702	6.07075	ENSMUSG00000046532	8	Ar	protein_coding	ensembl_havana	chrX:98148769-98323215:+
98.888	0.821622	1.67317	0.491056	0.623387	0.679411	7.14632	ENSMUSG00000030168	13	Adipor2	protein_coding	ensembl_havana	chr6:119353150-119417704:-
98.8727	5.92391	1.96362	3.01684				ENSMUSG00000024660	8	Incenp	protein_coding	ensembl	chr19:9872297-9899533:-
98.8333	2.06922	1.86931	1.10694	0.268318	0.438575	6.5981	ENSMUSG00000015755	16	Tab2	protein_coding	ensembl_havana	chr10:7905653-7956230:-
98.7682	0.886181	2.05446	0.431345				ENSMUSG00000064128	6	Cenpj	protein_coding	ensembl_havana	chr14:56526761-56571846:-
98.7449	-7.74352	2.17003	-3.56839				ENSMUSG00000048834	16	Vstm2a	protein_coding	ensembl_havana	chr11:16257724-16427310:+
98.6963	5.00133	1.81641	2.75341				ENSMUSG00000020740	13	Gga3	protein_coding	ensembl_havana	chr11:115584255-115604051:-
98.6439	3.70896	1.5466	2.39814				ENSMUSG00000063450	14	Syne2	protein_coding	ensembl_havana	chr12:75818134-76110926:+
98.3222	-0.379586	1.69626	-0.223778	0.82293	0.799665	6.5981	ENSMUSG00000021156	16	Zmynd11	protein_coding	ensembl_havana	chr13:9684836-9765321:-
98.1015	-1.03096	1.56045	-0.660683	0.508816	0.636966	6.5981	ENSMUSG00000032661	9	Oas3	protein_coding	ensembl_havana	chr5:120753098-120777661:-
97.8554	0.8104	1.63824	0.494678				ENSMUSG00000056476	13	Med12l	protein_coding	ensembl_havana	chr3:59005825-59318682:+
97.8215	6.25054	2.22985	2.80312				ENSMUSG00000015291	10	Gdi1	protein_coding	ensembl_havana	chrX:74304998-74311862:+
97.821	6.3846	1.97485	3.23295				ENSMUSG00000044308	17	Ubr3	protein_coding	ensembl_havana	chr2:69897246-70024013:+
97.7754	0.738948	1.48997	0.495947	0.619932	0.707149	6.5981	ENSMUSG00000019087	13	Atp6ap1	protein_coding	ensembl_havana	chrX:74297097-74304721:+
97.7333	2.74448	1.70743	1.60738				ENSMUSG00000034042	16	Gpbp1l1	protein_coding	ensembl_havana	chr4:116557658-116593882:+
97.5735	0.705	1.91485	0.368176				ENSMUSG00000030199	16	Etv6	protein_coding	ensembl_havana	chr6:134035700-134270158:+
97.5325	4.69157	2.10859	2.22498				ENSMUSG00000026698	8	Pigc	protein_coding	ensembl_havana	chr1:161969186-161973435:+
97.5046	6.17568	2.22163	2.77979				ENSMUSG00000079065	3	BC005561	protein_coding	ensembl_havana	chr5:104508352-104522611:+
97.3234	7.57136	1.92487	3.93345	8.37351e-05	0.0038534	6.5981	ENSMUSG00000050818	6	Olfr330	protein_coding	ensembl_havana	chr11:58527186-58534836:-
97.301	1.08526	1.09131	0.994459				ENSMUSG00000032803	15	Cdv3	protein_coding	ensembl_havana	chr9:103353094-103365840:-
97.2461	-6.33657	1.62134	-3.90824	9.29716e-05	0.00394088	6.5981	ENSMUSG00000020964	14	Sel1l	protein_coding	ensembl_havana	chr12:91806043-91849157:-
97.2239	1.96799	2.00984	0.979174	0.327494	0.521344	6.07075	ENSMUSG00000004285	12	Atp6v1f	protein_coding	ensembl_havana	chr6:29467718-29470512:+
97.1544	5.34935	1.60144	3.34034	0.000836762	0.0158111	6.41147	ENSMUSG00000035064	17	Eef2k	protein_coding	ensembl_havana	chr7:120842831-120907450:+
97.1441	5.75346	1.70247	3.37949	0.000726212	0.0134062	7.14632	ENSMUSG00000040586	8	Ofd1	protein_coding	ensembl_havana	chrX:166390033-166440704:-
97.1184	-6.63468	1.4688	-4.51707	6.27013e-06	0.00147654	6.5981	ENSMUSG00000017421	18	Zfp207	protein_coding	ensembl_havana	chr11:80383279-80405733:+
97.0799	8.29742	2.43783	3.40361				ENSMUSG00000025888	5	Casp1	protein_coding	ensembl	chr9:5298517-5307265:+
96.9704	1.6548	1.69104	0.978564				ENSMUSG00000032384	16	Csnk1g1	protein_coding	ensembl_havana	chr9:65908924-66045015:+
96.9558	3.98868	1.35001	2.95456	0.00313119	0.0327818	6.5981	ENSMUSG00000074746	2	Pdzd8	protein_coding	ensembl	chr19:59296084-59345780:-
96.9483	2.97724	1.86745	1.59428				ENSMUSG00000029442	18	Wdr66	protein_coding	ensembl_havana	chr5:123252102-123327484:+
96.8324	3.66043	1.86951	1.95796				ENSMUSG00000075249	12	Fsip2	protein_coding	ensembl_havana	chr2:82943634-83008937:+
96.6443	4.24847	1.87027	2.27158				ENSMUSG00000030846	15	Tial1	protein_coding	ensembl_havana	chr7:128439777-128461717:-
96.6382	-6.42895	1.79721	-3.57718	0.000347322	0.00970919	7.14632	ENSMUSG00000023572	16	Ccndbp1	protein_coding	ensembl_havana	chr2:121008403-121016904:+
96.5815	-5.23932	1.87093	-2.80038				ENSMUSG00000034290	9	Nek9	protein_coding	ensembl_havana	chr12:85299514-85339362:-
96.3294	3.35182	1.57402	2.12946				ENSMUSG00000027508	15	Pag1	protein_coding	ensembl_havana	chr3:9687479-9833679:-
96.2488	-1.27856	1.35951	-0.940457				ENSMUSG00000045962	16	Wnk1	protein_coding	ensembl_havana	chr6:119923969-120038672:-
96.1923	7.49142	2.2427	3.34035				ENSMUSG00000027002	13	Nckap1	protein_coding	ensembl_havana	chr2:80500512-80581380:-
96.1777	2.14877	1.64438	1.30673	0.191303	0.34218	7.14632	ENSMUSG00000028557	10	Rnf11	protein_coding	ensembl_havana	chr4:109451098-109484728:-
96.1668	0.566025	1.41172	0.400946	0.68846	0.745207	6.41147	ENSMUSG00000035021	13	Baz1a	protein_coding	ensembl_havana	chr12:54892989-55014348:-
96.0344	5.03796	1.71818	2.93214				ENSMUSG00000002957	11	Ap2a2	protein_coding	ensembl_havana	chr7:141562173-141633011:+
96.0167	1.37833	1.64085	0.840012	0.400902	0.562181	6.51356	ENSMUSG00000037058	14	Paip2	protein_coding	ensembl_havana	chr18:35598617-35617186:+
95.8853	7.64644	2.18367	3.50164	0.000462403	0.0118219	6.07075	ENSMUSG00000001248	14	Gramd1a	protein_coding	ensembl_havana	chr7:31130127-31155896:-
95.8481	0.161109	0.897887	0.179432	0.857599	0.848575	6.07075	ENSMUSG00000000326	12	Comt	protein_coding	ensembl_havana	chr16:18406886-18426852:-
95.7006	3.9348	2.22763	1.76636				ENSMUSG00000051190	8	Olfr1356	protein_coding	ensembl_havana	chr10:78845052-78852166:-
95.4447	-7.75778	1.89613	-4.09138	4.28811e-05	0.00257584	7.14632	ENSMUSG00000021996	16	Esd	protein_coding	ensembl_havana	chr14:74732297-74750765:+
95.4386	3.37355	1.56104	2.1611	0.0306878	0.119328	7.14632	ENSMUSG00000032501	8	Trib1	protein_coding	ensembl_havana	chr15:59648350-59656550:+
95.2677	5.37417	1.96575	2.7339				ENSMUSG00000025983	11	Ccdc150	protein_coding	ensembl_havana	chr1:54250683-54368727:+
95.2012	-0.512947	1.23581	-0.415068	0.678092	0.760931	6.07075	ENSMUSG00000031453	16	Rasa3	protein_coding	ensembl_havana	chr8:13566948-13677603:-
95.0763	2.94324	1.76071	1.67162				ENSMUSG00000039210	16	Gpatch2	protein_coding	ensembl_havana	chr1:187215508-187351704:+
94.9832	-0.124544	1.7219	-0.072329				ENSMUSG00000051510	13	Mafg	protein_coding	ensembl_havana	chr11:120625117-120633600:-
94.903	1.20044	1.90672	0.629587	0.528965	0.662676	6.41147	ENSMUSG00000029616	9	Erp29	protein_coding	ensembl_havana	chr5:121428590-121452506:-
94.5992	3.36929	1.92595	1.74942				ENSMUSG00000075327	10	Zbtb2	protein_coding	ensembl_havana	chr10:4367075-4388108:-
94.4805	-0.237563	0.971872	-0.244439	0.806891	0.802242	6.41147	ENSMUSG00000044820	6	AY074887	protein_coding	ensembl_havana	chr9:54950230-54950998:-
94.3811	4.85725	1.67567	2.89869				ENSMUSG00000033306	14	Lpp	protein_coding	ensembl	chr16:24393350-24992576:+
94.31	2.19375	1.5349	1.42924	0.152934	0.32511	6.41147	ENSMUSG00000041966	18	Dcaf17	protein_coding	ensembl_havana	chr2:71055328-71099142:+
94.2872	-8.11444	1.9835	-4.09098	4.29561e-05	0.00257584	6.5981	ENSMUSG00000038187	14	Btbd10	protein_coding	ensembl_havana	chr7:113315626-113369392:-
94.1867	1.91753	1.3784	1.39113				ENSMUSG00000026626	11	Ppp2r5a	protein_coding	ensembl_havana	chr1:191351975-191403272:-
93.8077	3.89248	2.43878	1.59608				ENSMUSG00000089911	4	Mfsd14a	protein_coding	ensembl_havana	chr3:116631164-116662677:-
93.7381	4.20106	1.76939	2.37431				ENSMUSG00000027363	15	Usp8	protein_coding	ensembl_havana	chr2:126707328-126759297:+
93.6345	-1.6775	1.04845	-1.59998	0.109602	0.267976	6.41147	ENSMUSG00000039782	14	Cpeb2	protein_coding	ensembl_havana	chr5:43233170-43289724:+
93.4759	-0.789578	1.6174	-0.488178	0.625424	0.732394	6.07075	ENSMUSG00000045284	9	Dcaf12l1	protein_coding	ensembl_havana	chrX:44786570-44790197:-
93.2153	3.32332	1.81283	1.83322				ENSMUSG00000024942	16	Capn1	protein_coding	ensembl	chr19:5988546-6015825:-
92.9242	1.65051	1.92136	0.859031				ENSMUSG00000004591	16	Pkn2	protein_coding	ensembl_havana	chr3:142790902-142882004:-
92.8979	0.569751	1.62186	0.351295	0.725367	0.760025	6.51356	ENSMUSG00000002668	7	Dennd1c	protein_coding	ensembl	chr17:57066056-57078510:-
92.8878	5.65073	1.83986	3.07129				ENSMUSG00000018983	9	E2f2	protein_coding	ensembl_havana	chr4:136172394-136196057:+
92.8535	-5.31125	2.17674	-2.44				ENSMUSG00000071452	4	Gm11397	protein_coding	havana	chr13:33395761-33405285:+
92.8356	-9.07197	2.5509	-3.55637				ENSMUSG00000050028	5	Olfr745	protein_coding	ensembl_havana	chr14:50639388-50643885:+
92.7883	1.86648	1.38709	1.34561	0.178429	0.330781	7.14632	ENSMUSG00000052707	8	Tnrc6a	protein_coding	ensembl_havana	chr7:123123885-123195296:+
92.7619	6.29681	2.04596	3.07768				ENSMUSG00000025408	15	Ddit3	protein_coding	ensembl_havana	chr10:127290774-127296288:+
92.6783	0.636786	2.45523	0.259359				ENSMUSG00000026577	13	Blzf1	protein_coding	ensembl_havana	chr1:164289800-164307489:-
92.4938	-7.25406	1.81703	-3.99226	6.54452e-05	0.00330249	6.5981	ENSMUSG00000090000	1	Ier3ip1	protein_coding	ensembl_havana	chr18:76930017-76941605:+
92.4674	7.39937	1.96729	3.76121	0.000169095	0.00636898	6.51356	ENSMUSG00000091337	3	Eid1	protein_coding	ensembl_havana	chr2:125673095-125674785:+
92.3298	4.36349	2.10122	2.07664				ENSMUSG00000070372	11	Capza1	protein_coding	ensembl_havana	chr3:104822779-104864505:-
91.7798	-2.62635	1.95519	-1.34327	0.179185	0.345555	6.5981	ENSMUSG00000033213	16	AA467197	protein_coding	ensembl_havana	chr2:122636986-122641191:+
91.7533	0.472579	1.6587	0.28491	0.775713	0.787679	6.41147	ENSMUSG00000027630	13	Tbl1xr1	protein_coding	ensembl_havana	chr3:22076652-22216594:+
91.5852	3.6307	1.32815	2.73366	0.00626349	0.0534963	6.07075	ENSMUSG00000027366	12	Sppl2a	protein_coding	ensembl_havana	chr2:126890391-126933235:-
91.5189	-5.28336	2.15606	-2.45048				ENSMUSG00000050628	6	Ubald2	protein_coding	ensembl_havana	chr11:116434094-116439077:+
91.5057	-0.937437	1.63005	-0.575096	0.565227	0.681864	6.41147	ENSMUSG00000041417	15	Pik3r1	protein_coding	ensembl_havana	chr13:101680563-101768217:-
91.3677	1.74408	1.62582	1.07274	0.283388	0.451928	6.5981	ENSMUSG00000020376	16	Rnf130	protein_coding	ensembl_havana	chr11:50025346-50104758:+
91.3667	2.41233	1.66975	1.44473				ENSMUSG00000028161	17	Ppp3ca	protein_coding	ensembl_havana	chr3:136670124-136937727:+
91.3646	3.58621	1.93068	1.85748				ENSMUSG00000090059	4	Olfr1062	protein_coding	ensembl_havana	chr2:86420399-86426749:-
91.3235	1.74441	1.83043	0.953005				ENSMUSG00000036241	3	Ube2r2	protein_coding	ensembl_havana	chr4:41135743-41193380:+
91.2985	8.35374	2.03995	4.09507	4.22035e-05	0.00257584	6.51356	ENSMUSG00000051081	7	Gm4847	protein_coding	ensembl_havana	chr1:166628971-166647693:-
91.1742	3.74586	2.18515	1.71423				ENSMUSG00000019809	16	Pex3	protein_coding	ensembl_havana	chr10:13523842-13553142:-
90.937	-0.0786928	2.17467	-0.036186				ENSMUSG00000027109	16	Sp3	protein_coding	ensembl_havana	chr2:72936427-72980446:-
90.8801	4.54022	1.53419	2.95936	0.00308275	0.0312557	7.14632	ENSMUSG00000037946	11	Fgd3	protein_coding	ensembl_havana	chr13:49261554-49320311:-
90.8718	5.34313	1.78334	2.99614				ENSMUSG00000037007	17	Zfp113	protein_coding	ensembl_havana	chr5:138139702-138155744:-
90.8191	4.6355	1.95027	2.37685				ENSMUSG00000018846	8	Pank3	protein_coding	ensembl_havana	chr11:35769484-35791285:+
90.7547	6.5039	2.27171	2.863				ENSMUSG00000047444	3	Olfr139	protein_coding	ensembl_havana	chr11:74044033-74056551:-
90.6929	-6.59924	1.84651	-3.57389				ENSMUSG00000071172	12	Srsf3	protein_coding	ensembl_havana	chr17:29032673-29043366:+
90.5776	0.679936	1.29926	0.523327	0.600747	0.721385	6.07075	ENSMUSG00000024014	7	Pim1	protein_coding	ensembl_havana	chr17:29490812-29496111:+
90.5669	2.54873	1.77936	1.43239	0.152032	0.320989	6.51356	ENSMUSG00000052726	15	Kcnt2	protein_coding	ensembl_havana	chr1:140246158-140612067:+
90.5591	4.75828	2.2298	2.13395				ENSMUSG00000036199	9	Ndufa13	protein_coding	ensembl_havana	chr8:69894180-69902558:-
90.4798	3.12285	1.54122	2.02622	0.0427419	0.156059	6.51356	ENSMUSG00000031093	14	Dock11	protein_coding	ensembl_havana	chrX:35888832-36076562:+
90.2973	2.30626	1.65494	1.39356	0.16345	0.317056	7.14632	ENSMUSG00000015839	6	Nfe2l2	protein_coding	ensembl_havana	chr2:75675513-75704641:-
90.2885	-5.41911	1.97043	-2.75021				ENSMUSG00000034973	16	Dopey1	protein_coding	ensembl_havana	chr9:86467154-86555923:+
90.1429	-1.11335	1.21748	-0.914472	0.360469	0.535204	6.41147	ENSMUSG00000054823	16	Whsc1l1	protein_coding	ensembl_havana	chr8:25601601-25719667:+
90.1049	3.25026	1.80497	1.80073	0.0717457	0.198739	7.14632	ENSMUSG00000036180	15	Gatad2a	protein_coding	ensembl_havana	chr8:69907076-69996384:-
89.9826	-6.14891	2.0587	-2.98679				ENSMUSG00000024525	6	Impa2	protein_coding	ensembl	chr18:67289253-67319146:+
89.887	2.96933	1.79316	1.65592				ENSMUSG00000042489	15	Clspn	protein_coding	ensembl_havana	chr4:126556935-126593903:+
89.8619	1.27821	1.4046	0.910017				ENSMUSG00000093942	3	Olfr46	protein_coding	ensembl_havana	chr7:140601269-140617678:+
89.7957	7.03799	2.0709	3.39851				ENSMUSG00000091926	2	Vmn2r62	protein_coding	ensembl_havana	chr7:42764438-42793496:-
89.5968	0.785737	1.35814	0.578539				ENSMUSG00000037270	18	4932438A13Rik	protein_coding	ensembl_havana	chr3:36863104-37053033:+
89.4346	-7.36254	2.30432	-3.1951				ENSMUSG00000034320	14	Slc26a2	protein_coding	ensembl_havana	chr18:61192919-61211612:-
89.3054	0.802947	1.52415	0.526815	0.598322	0.667505	7.14632	ENSMUSG00000027881	14	Prpf38b	protein_coding	ensembl_havana	chr3:108902805-108911727:-
89.2596	1.37722	1.88574	0.730337				ENSMUSG00000001123	15	Lgals9	protein_coding	ensembl_havana	chr11:78962974-78984946:-
89.259	-0.59133	1.68209	-0.351545	0.725179	0.764836	6.41147	ENSMUSG00000041328	16	Pcf11	protein_coding	ensembl_havana	chr7:92643543-92669934:-
89.2498	3.70032	1.52131	2.43233				ENSMUSG00000021596	16	Mctp1	protein_coding	ensembl_havana	chr13:76384535-77031810:+
89.193	-2.45257	1.87673	-1.30683	0.191269	0.34218	7.14632	ENSMUSG00000045128	9	Rpl18a	protein_coding	ensembl_havana	chr8:70894722-70897412:-
89.1671	-0.706766	1.62693	-0.434416	0.663986	0.7329	6.41147	ENSMUSG00000023927	15	Satb1	protein_coding	ensembl_havana	chr17:51736187-51833290:-
89.108	-3.36189	1.82332	-1.84383				ENSMUSG00000041439	15	Mfsd6	protein_coding	ensembl_havana	chr1:52656286-52727462:-
88.9827	-4.62942	1.54352	-2.99925	0.00270646	0.031971	6.07075	ENSMUSG00000027177	14	Hipk3	protein_coding	ensembl_havana	chr2:104426481-104494446:-
88.8823	-1.58615	1.59929	-0.991787	0.321302	0.491314	6.51356	ENSMUSG00000037369	16	Kdm6a	protein_coding	ensembl_havana	chrX:18162575-18279936:+
88.8416	6.27107	2.23767	2.8025				ENSMUSG00000021022	8	Ppp2r3c	protein_coding	ensembl	chr12:55280814-55303000:-
88.7857	5.43812	1.35144	4.02394	5.72331e-05	0.00311025	6.5981	ENSMUSG00000027620	16	Rbm39	protein_coding	ensembl_havana	chr2:156147239-156180238:-
88.7672	-2.55005	1.76324	-1.44623				ENSMUSG00000023403	14	Stk31	protein_coding	ensembl_havana	chr6:49395604-49469501:+
88.6218	2.36051	2.11751	1.11476	0.264954	0.438575	6.51356	ENSMUSG00000020205	8	Phlda1	protein_coding	ensembl_havana	chr10:111506286-111508645:+
88.612	0.470888	1.69457	0.27788	0.781104	0.779318	6.5981	ENSMUSG00000029405	16	G3bp2	protein_coding	ensembl_havana	chr5:92052146-92083719:-
88.5502	-7.33537	2.11336	-3.47095				ENSMUSG00000100586	1	Vmn1r90	protein_coding	havana	chr7:14560699-14562362:-
88.5227	-4.68651	1.63125	-2.87295	0.00406655	0.0388023	6.51356	ENSMUSG00000014294	4	Ndufa2	protein_coding	ensembl_havana	chr18:36742332-36744557:-
88.2348	6.18718	1.95316	3.16777	0.00153612	0.0212769	6.51356	ENSMUSG00000028494	12	Plin2	protein_coding	ensembl_havana	chr4:86648386-86670060:-
88.186	5.23725	1.82156	2.87515				ENSMUSG00000003518	13	Dusp3	protein_coding	ensembl_havana	chr11:101971143-101987013:-
88.156	6.03293	1.53364	3.93374	8.36339e-05	0.0038534	6.51356	ENSMUSG00000001741	12	Il16	protein_coding	ensembl_havana	chr7:83642825-83745726:-
88.1359	-5.35778	1.99565	-2.68473				ENSMUSG00000035725	13	Prkx	protein_coding	ensembl_havana	chrX:77761411-77796278:-
88.0479	-3.89336	2.15397	-1.80753				ENSMUSG00000029082	17	Bst1	protein_coding	ensembl_havana	chr5:43818885-43843986:+
87.8915	5.55792	2.20672	2.51864				ENSMUSG00000030092	14	Cntn6	protein_coding	ensembl_havana	chr6:104492790-104863406:+
87.886	5.96604	1.95794	3.04711				ENSMUSG00000030930	14	Chst15	protein_coding	ensembl_havana	chr7:132235780-132317228:-
87.7821	-2.19427	1.69346	-1.29573	0.195068	0.384487	6.07075	ENSMUSG00000062757	2	Olfr1206	protein_coding	ensembl_havana	chr2:88863231-88867753:+
87.596	2.32203	1.95995	1.18474				ENSMUSG00000021178	8	Psmc1	protein_coding	ensembl	chr12:100110186-100123364:+
87.3575	-3.25372	1.42062	-2.29035	0.0220008	0.105362	6.07075	ENSMUSG00000006586	15	Runx1t1	protein_coding	ensembl_havana	chr4:13743436-13893649:+
87.1738	2.00507	1.31444	1.52542	0.127155	0.302898	6.07075	ENSMUSG00000058099	15	Nfam1	protein_coding	ensembl_havana	chr15:82997721-83033306:-
87.0164	7.41251	2.20462	3.36227				ENSMUSG00000078260	1	Gm11569	protein_coding	ensembl_havana	chr11:99798064-99798932:-
86.9762	5.80042	2.14052	2.70982				ENSMUSG00000038764	14	Ptpn3	protein_coding	ensembl_havana	chr4:57190841-57301837:-
86.9584	3.34691	1.59349	2.10037				ENSMUSG00000036030	9	Prtg	protein_coding	ensembl_havana	chr9:72806874-72917291:+
86.6496	5.47575	1.76538	3.10175				ENSMUSG00000019715	14	Gle1	protein_coding	ensembl_havana	chr2:29935426-29960371:+
86.6043	-1.36044	1.53652	-0.885401	0.37594	0.540661	6.51356	ENSMUSG00000024483	18	Ankhd1	protein_coding	ensembl_havana	chr18:36559987-36665917:+
86.2561	3.11219	2.36992	1.3132	0.189114	0.376513	6.07075	ENSMUSG00000031688	4	Pou4f2	protein_coding	ensembl_havana	chr8:78433010-78436645:-
86.0983	-4.81242	1.79756	-2.6772				ENSMUSG00000028797	20	Tmem234	protein_coding	ensembl_havana	chr4:129600668-129624059:+
85.8453	4.91087	1.86595	2.63184				ENSMUSG00000032497	16	Lrrfip2	protein_coding	ensembl_havana	chr9:111117592-111225668:+
85.8224	4.68148	1.58331	2.95676				ENSMUSG00000006676	16	Usp19	protein_coding	ensembl_havana	chr9:108490602-108502337:+
85.8001	3.0258	1.7509	1.72814	0.0839626	0.228177	6.51356	ENSMUSG00000045503	16	Sys1	protein_coding	ensembl_havana	chr2:164456964-164479638:+
85.596	-4.36308	2.40482	-1.81431				ENSMUSG00000021127	6	Zfp36l1	protein_coding	ensembl	chr12:80107760-80113013:-
85.558	0.837036	1.1783	0.710377	0.47747	0.642075	6.07075	ENSMUSG00000036181	2	Hist1h1c	protein_coding	ensembl_havana	chr13:23738808-23740367:+
85.4241	-0.387408	1.68091	-0.230475	0.817723	0.795444	6.5981	ENSMUSG00000029713	15	Gnb2	protein_coding	ensembl_havana	chr5:137528127-137533510:-
85.2853	-8.74504	2.50871	-3.48587				ENSMUSG00000051056	4	Gja10	protein_coding	ensembl_havana	chr4:32600644-32602760:-
85.2531	0.836983	1.27694	0.65546	0.512171	0.642075	6.51356	ENSMUSG00000049091	6	Sephs2	protein_coding	ensembl_havana	chr7:127271879-127274055:-
85.2475	1.42816	1.64506	0.868154				ENSMUSG00000028868	13	Wasf2	protein_coding	ensembl_havana	chr4:133130505-133199756:+
85.0373	-4.29074	1.09412	-3.92164	8.79482e-05	0.0038534	6.51356	ENSMUSG00000009418	15	Nav1	protein_coding	ensembl_havana	chr1:135434580-135607295:-
84.9828	1.42339	2.011	0.707804				ENSMUSG00000037960	10	Card19	protein_coding	ensembl	chr13:49202951-49216026:-
84.9572	2.99407	1.6345	1.83179	0.0669827	0.208443	6.07075	ENSMUSG00000035248	8	Zcchc6	protein_coding	ensembl	chr13:59771879-59823147:-
84.867	-0.480426	1.51589	-0.316928				ENSMUSG00000030180	15	Kdm5a	protein_coding	ensembl_havana	chr6:120364124-120444574:+
84.6134	6.37044	2.02586	3.14455	0.0016634	0.0220954	6.51356	ENSMUSG00000032554	15	Trf	protein_coding	ensembl_havana	chr9:103204001-103230444:-
84.5847	4.81289	1.95421	2.46283				ENSMUSG00000021886	6	Gpr65	protein_coding	ensembl	chr12:98268635-98276624:+
84.3737	4.95495	1.94612	2.54607				ENSMUSG00000032724	5	Abtb2	protein_coding	ensembl_havana	chr2:103566310-103718423:+
84.3706	1.32213	1.77564	0.744595				ENSMUSG00000036529	17	Sbf1	protein_coding	ensembl_havana	chr15:89288236-89315311:-
84.1855	-1.83052	1.43292	-1.27748	0.201435	0.391462	6.07075	ENSMUSG00000005533	10	Igf1r	protein_coding	ensembl_havana	chr7:67952827-68233668:+
84.1732	0.644726	1.55875	0.413618	0.679154	0.711321	7.14632	ENSMUSG00000024054	13	Smchd1	protein_coding	ensembl_havana	chr17:71344489-71475343:-
84.0727	-5.35475	2.02804	-2.64036				ENSMUSG00000021773	10	Comtd1	protein_coding	ensembl_havana	chr14:21845861-21848977:-
83.9825	5.28206	1.9468	2.7132				ENSMUSG00000029830	15	Svopl	protein_coding	ensembl_havana	chr6:37983739-38046996:-
83.8835	0.363762	1.3451	0.270435	0.786826	0.755481	7.14632	ENSMUSG00000063015	12	Ccni	protein_coding	ensembl_havana	chr5:93181933-93206495:-
83.7638	4.28317	1.6018	2.67398				ENSMUSG00000029185	14	Fam114a1	protein_coding	ensembl_havana	chr5:64970071-65041886:+
83.7531	0.260863	1.46911	0.177565	0.859065	0.815013	6.5981	ENSMUSG00000059089	4	Fcgr4	protein_coding	ensembl_havana	chr1:171018920-171029761:+
83.6812	-1.59962	1.98908	-0.8042				ENSMUSG00000034488	14	Edil3	protein_coding	ensembl_havana	chr13:88821472-89323223:+
83.6114	1.92173	1.97263	0.974196	0.329959	0.506446	6.41147	ENSMUSG00000038416	15	Cdc16	protein_coding	ensembl_havana	chr8:13757676-13781938:+
83.5864	-1.30101	1.94143	-0.670133	0.502773	0.605063	7.14632	ENSMUSG00000028023	16	Pitx2	protein_coding	ensembl_havana	chr3:129199878-129219591:+
83.5418	-6.66271	1.90385	-3.4996	0.000465957	0.0116815	6.41147	ENSMUSG00000032402	12	Smad3	protein_coding	ensembl_havana	chr9:63646767-63757994:-
83.5397	-1.45136	1.5616	-0.929408	0.352678	0.526864	6.41147	ENSMUSG00000030557	17	Mef2a	protein_coding	ensembl_havana	chr7:67231163-67372858:-
83.4853	-2.21906	1.62783	-1.3632	0.17282	0.340706	6.51356	ENSMUSG00000029455	14	Aldh2	protein_coding	ensembl_havana	chr5:121566027-121593824:-
83.474	-2.90267	1.39033	-2.08776	0.0368191	0.144004	6.41147	ENSMUSG00000025060	14	Slk	protein_coding	ensembl_havana	chr19:47579678-47645246:+
83.4461	4.20944	2.49061	1.69013				ENSMUSG00000024261	5	Syt4	protein_coding	ensembl	chr18:31437808-31447415:-
83.3894	-6.28903	1.93785	-3.24536				ENSMUSG00000020705	6	Ddx42	protein_coding	ensembl_havana	chr11:106216926-106249139:+
83.3419	7.76668	2.42617	3.20121				ENSMUSG00000059595	2	Olfr935	protein_coding	ensembl_havana	chr9:38993971-38999683:-
83.1559	-4.40038	2.12617	-2.06963				ENSMUSG00000058240	13	Cryzl1	protein_coding	ensembl_havana	chr16:91689322-91728975:-
82.9512	4.88354	1.31009	3.72763	0.000193287	0.00680278	6.51356	ENSMUSG00000032870	8	Smap2	protein_coding	ensembl_havana	chr4:120968317-121017247:-
82.929	4.33345	2.05039	2.11348				ENSMUSG00000038122	8	Tbc1d32	protein_coding	ensembl	chr10:56014298-56228689:-
82.9063	-0.300779	1.73581	-0.173279	0.862432	0.829954	6.41147	ENSMUSG00000040423	10	Rc3h1	protein_coding	ensembl_havana	chr1:160906418-160974978:+
82.7605	1.4403	1.47546	0.976176	0.328977	0.473343	7.14632	ENSMUSG00000024404	6	Riok3	protein_coding	ensembl	chr18:12128850-12157367:+
82.646	3.00821	1.92834	1.56				ENSMUSG00000002455	14	Prpf6	protein_coding	ensembl_havana	chr2:181591868-181655660:+
82.6338	2.35556	1.10318	2.13525	0.0327408	0.132876	6.51356	ENSMUSG00000037095	7	Lrg1	protein_coding	ensembl	chr17:56119680-56121946:-
82.5657	3.07265	1.51275	2.03117				ENSMUSG00000036390	8	Gadd45a	protein_coding	ensembl_havana	chr6:67035096-67037457:-
82.4985	-6.62156	1.57075	-4.21555	2.49172e-05	0.00257238	6.07075	ENSMUSG00000044365	15	Cxxc4	protein_coding	ensembl_havana	chr3:134236484-134262161:+
82.4377	2.74832	1.75707	1.56415	0.117781	0.274013	6.5981	ENSMUSG00000069670	7	Nkain2	protein_coding	ensembl_havana	chr10:31689310-32890462:-
82.3886	2.2278	1.56233	1.42595	0.153883	0.333149	6.07075	ENSMUSG00000024621	15	Csf1r	protein_coding	ensembl_havana	chr18:61105572-61132149:+
82.3737	5.7567	1.83006	3.14563				ENSMUSG00000029287	14	Tgfbr3	protein_coding	ensembl_havana	chr5:107106570-107289629:-
82.3502	0.422538	1.62183	0.260532	0.794454	0.795444	6.41147	ENSMUSG00000024451	8	Arap3	protein_coding	ensembl	chr18:37972624-37997574:-
82.2621	-0.152132	1.27397	-0.119416	0.904946	0.844344	6.51356	ENSMUSG00000019907	9	Ppp1r12a	protein_coding	ensembl	chr10:108162400-108277575:+
82.2464	-6.53504	1.78817	-3.6546	0.000257581	0.00852995	6.5981	ENSMUSG00000026771	14	Spopl	protein_coding	ensembl_havana	chr2:23506220-23572106:-
82.2388	-0.475708	2.38404	-0.199538	0.841842	0.843614	6.07075	ENSMUSG00000030876	7	Mettl9	protein_coding	ensembl_havana	chr7:121034445-121078329:+
82.2357	-4.93626	1.88282	-2.62174	0.00874831	0.0621697	6.5981	ENSMUSG00000035674	13	Ndufa3	protein_coding	ensembl_havana	chr7:3617373-3620327:+
82.2355	0.819466	1.7079	0.479809	0.631363	0.719784	6.41147	ENSMUSG00000028132	15	Tmem56	protein_coding	ensembl_havana	chr3:121201761-121283098:-
82.217	4.46205	1.89402	2.35586				ENSMUSG00000032796	7	Lama1	protein_coding	ensembl	chr17:67697265-67822645:+
82.1485	5.56619	1.91349	2.90893	0.0036267	0.0372545	6.51356	ENSMUSG00000022124	14	Fbxl3	protein_coding	ensembl_havana	chr14:103080239-103099566:-
82.1088	6.48318	1.83279	3.53734	0.000404184	0.0105756	6.5981	ENSMUSG00000036943	9	Rab8b	protein_coding	ensembl_havana	chr9:66843664-66919687:-
82.0462	5.42808	1.99292	2.72368				ENSMUSG00000040612	13	Ildr2	protein_coding	ensembl_havana	chr1:166254139-166316823:+
82.0071	6.48043	1.95266	3.31877				ENSMUSG00000028962	14	Slc4a2	protein_coding	ensembl_havana	chr5:24423837-24440950:+
81.8908	-4.08198	1.7552	-2.32565				ENSMUSG00000022952	16	Runx1	protein_coding	ensembl_havana	chr16:92601466-92826149:-
81.7486	2.57139	1.8817	1.36653				ENSMUSG00000027227	7	Sord	protein_coding	ensembl_havana	chr2:122234749-122265340:+
81.643	-1.1273	1.48928	-0.756944	0.449083	0.593383	6.5981	ENSMUSG00000020460	15	Rps27a	protein_coding	ensembl_havana	chr11:29545846-29548109:-
81.5073	5.51075	2.62449	2.09974				ENSMUSG00000067941	5	Gm7168	protein_coding	ensembl_havana	chr17:13948373-13950678:+
81.4933	6.11045	1.8813	3.24799				ENSMUSG00000049307	6	Fut4	protein_coding	ensembl_havana	chr9:14748320-14752393:-
81.4916	4.62122	1.99936	2.31135				ENSMUSG00000034377	10	Tulp4	protein_coding	ensembl_havana	chr17:6106437-6251128:+
81.2347	2.1693	1.57623	1.37626	0.16874	0.334232	6.5981	ENSMUSG00000030660	9	Pik3c2a	protein_coding	ensembl_havana	chr7:116337265-116443449:-
81.1665	-0.0539004	1.74386	-0.0309087	0.975342	0.8886	6.41147	ENSMUSG00000003778	14	Brd8	protein_coding	ensembl_havana	chr18:34598615-34624601:-
81.1621	-1.61766	1.94586	-0.831332	0.405786	0.587433	6.07075	ENSMUSG00000024096	16	Ralbp1	protein_coding	ensembl	chr17:65848433-65885755:-
81.1342	-0.304291	1.79787	-0.169251				ENSMUSG00000004937	5	Sgta	protein_coding	ensembl	chr10:81044075-81060178:-
81.0891	2.75261	2.15931	1.27476				ENSMUSG00000002102	15	Psmc3	protein_coding	ensembl_havana	chr2:91054009-91066369:+
80.9758	-3.34764	1.87187	-1.7884				ENSMUSG00000036661	13	Dennd3	protein_coding	ensembl_havana	chr15:73512560-73572242:+
80.8697	2.12684	2.40532	0.884225	0.376575	0.540661	6.51356	ENSMUSG00000031696	9	Vps35	protein_coding	ensembl_havana	chr8:85260392-85299802:-
80.8579	7.61753	1.99784	3.81289				ENSMUSG00000030879	10	Mrpl17	protein_coding	ensembl_havana	chr7:105803206-105811099:-
80.838	-7.00847	1.96627	-3.56436				ENSMUSG00000037958	13	Nsrp1	protein_coding	ensembl_havana	chr11:77044292-77078435:-
80.7836	7.24771	2.34903	3.08541				ENSMUSG00000069633	12	Pex11g	protein_coding	ensembl_havana	chr8:3457105-3467680:-
80.7472	2.80942	2.25566	1.2455				ENSMUSG00000085576	3	Dpy19l2	protein_coding	ensembl_havana	chr9:24557047-24696293:-
80.7265	4.82097	1.47107	3.27719	0.00104845	0.0177292	6.51356	ENSMUSG00000021987	8	Mtmr6	protein_coding	ensembl	chr14:60265205-60302370:+
80.7018	2.0137	1.83497	1.0974	0.272465	0.448844	6.41147	ENSMUSG00000054499	9	Dedd2	protein_coding	ensembl_havana	chr7:25199915-25220615:-
80.6834	2.62202	1.79257	1.46271	0.143547	0.311378	6.51356	ENSMUSG00000048249	14	Crebrf	protein_coding	ensembl_havana	chr17:26715650-26776635:+
80.6062	6.2748	1.88938	3.32108				ENSMUSG00000032850	16	Rnft2	protein_coding	ensembl_havana	chr5:118190736-118245116:-
80.5993	3.85692	1.57303	2.45191	0.01421	0.0767151	7.14632	ENSMUSG00000052270	7	Fpr2	protein_coding	ensembl_havana	chr17:17887824-17893952:+
80.4888	5.79485	1.75189	3.30776				ENSMUSG00000041215	15	Yeats2	protein_coding	ensembl	chr16:20141063-20232573:+
80.3587	-0.833427	1.11406	-0.748096	0.454402	0.625839	6.07075	ENSMUSG00000066406	15	Akap13	protein_coding	ensembl_havana	chr7:75455534-75754609:+
80.3357	-0.0776844	0.923938	-0.0840797	0.932993	0.815851	7.14632	ENSMUSG00000036790	5	Slitrk2	protein_coding	ensembl_havana	chrX:66649318-66661393:+
80.2757	1.24269	1.77477	0.700198	0.483803	0.62923	6.41147	ENSMUSG00000047767	17	Atg16l2	protein_coding	ensembl_havana	chr7:101263034-101302251:-
80.1949	0.12557	1.87669	0.0669104	0.946653	0.904071	6.07075	ENSMUSG00000027677	17	Ttc14	protein_coding	ensembl_havana	chr3:33799832-33814860:+
80.1866	6.3274	2.15944	2.9301				ENSMUSG00000047592	17	Nxpe5	protein_coding	ensembl_havana	chr5:138225898-138253363:+
80.1299	1.0321	1.4617	0.706099	0.480127	0.588343	7.14632	ENSMUSG00000073982	11	Rhog	protein_coding	ensembl_havana	chr7:102239123-102256054:-
80.0562	-1.41737	1.43548	-0.987387	0.323453	0.469189	7.14632	ENSMUSG00000022895	14	Ets2	protein_coding	ensembl_havana	chr16:95702075-95721051:+
79.993	-5.24189	1.43545	-3.65175	0.000260462	0.00895485	6.07075	ENSMUSG00000000194	13	Gpr107	protein_coding	ensembl_havana	chr2:31152316-31218775:+
79.9278	7.93618	2.05665	3.85878				ENSMUSG00000030255	13	Sspn	protein_coding	ensembl_havana	chr6:145931641-145965223:+
79.8365	2.67035	1.92572	1.38668	0.165539	0.34651	6.07075	ENSMUSG00000052917	14	Senp7	protein_coding	ensembl_havana	chr16:56048338-56190012:+
79.8064	-7.00543	2.30741	-3.03606				ENSMUSG00000021621	15	Zcchc9	protein_coding	ensembl_havana	chr13:91796533-91807705:-
79.7118	-0.269527	1.69354	-0.15915	0.873551	0.834191	6.41147	ENSMUSG00000078160	2	Gm16503	protein_coding	ensembl	chr4:147540218-147543500:+
79.6748	-1.72047	1.83701	-0.936563	0.348983	0.488829	7.14632	ENSMUSG00000058446	14	Znrf2	protein_coding	ensembl_havana	chr6:54816916-54893500:+
79.6124	1.97833	1.88898	1.0473				ENSMUSG00000058704	7	Memo1	protein_coding	ensembl	chr17:74200706-74294883:-
79.536	1.69954	2.67476	0.635397				ENSMUSG00000063380	3	Olfr945	protein_coding	ensembl_havana	chr9:39256869-39276818:-
79.205	-0.617244	1.23031	-0.501696	0.615881	0.676298	7.14632	ENSMUSG00000019132	10	BC005537	protein_coding	ensembl_havana	chr13:24801657-24814013:+
79.1344	5.6977	1.885	3.02265				ENSMUSG00000021301	8	Hecw1	protein_coding	ensembl	chr13:14226438-14523226:-
79.121	-1.08819	1.73499	-0.627202				ENSMUSG00000066861	14	Oas1g	protein_coding	ensembl_havana	chr5:120876142-120887613:-
78.7916	-3.21004	1.46847	-2.18597				ENSMUSG00000020431	5	Adcy1	protein_coding	ensembl_havana	chr11:7063489-7178506:+
78.6102	5.67403	2.37635	2.38771				ENSMUSG00000045631	9	Tmprss12	protein_coding	ensembl	chr15:100280837-100293053:+
78.6069	7.44283	2.8012	2.65701				ENSMUSG00000079371	9	Gm3476	protein_coding	ensembl_havana	chr14:6105321-6125807:-
78.3899	-7.02727	1.84483	-3.80918				ENSMUSG00000006262	15	Mob1b	protein_coding	ensembl_havana	chr5:88720855-88764220:+
78.3175	-4.41362	1.91124	-2.30929	0.0209274	0.101487	6.07075	ENSMUSG00000027957	13	Slc35a3	protein_coding	ensembl_havana	chr3:116669470-116712831:-
78.3079	-1.05599	1.18035	-0.894641	0.370979	0.537548	6.51356	ENSMUSG00000047888	9	Tnrc6b	protein_coding	ensembl	chr15:80711319-80941086:+
78.2789	-8.19349	2.21539	-3.69844				ENSMUSG00000039458	14	Mtmr12	protein_coding	ensembl_havana	chr15:12205028-12272240:+
78.2076	-6.08525	2.11659	-2.87503				ENSMUSG00000068921	14	Dap3	protein_coding	ensembl_havana	chr3:88920803-88951181:-
78.0956	-3.57229	2.21244	-1.61464	0.106388	0.265799	6.41147	ENSMUSG00000037966	15	Ninj1	protein_coding	ensembl_havana	chr13:49187485-49196244:+
78.0143	5.01964	1.55428	3.22956	0.00123983	0.0191496	6.51356	ENSMUSG00000029314	14	Agpat9	protein_coding	ensembl_havana	chr5:100845713-100899102:+
77.9074	2.22127	1.45377	1.52794	0.126527	0.290215	6.51356	ENSMUSG00000027706	8	Sec62	protein_coding	ensembl_havana	chr3:30792875-30821263:+
77.8746	7.1883	2.26662	3.17137				ENSMUSG00000051255	5	Gm6563	protein_coding	ensembl	chr19:23675844-23676712:+
77.699	0.131278	1.25943	0.104236	0.916982	0.847743	6.51356	ENSMUSG00000039361	11	Picalm	protein_coding	ensembl_havana	chr7:90130213-90213465:+
77.6904	3.4087	1.92793	1.76806				ENSMUSG00000069769	13	Msi2	protein_coding	ensembl_havana	chr11:88339382-88718513:-
77.678	7.98964	2.37968	3.35744				ENSMUSG00000003437	14	Paf1	protein_coding	ensembl_havana	chr7:28392951-28399388:+
77.6739	-0.586037	1.80822	-0.324096	0.745865	0.773241	6.41147	ENSMUSG00000005698	15	Ctcf	protein_coding	ensembl_havana	chr8:105636568-105682922:+
77.6491	1.01305	1.52307	0.665135	0.505964	0.639308	6.51356	ENSMUSG00000003031	14	Cdkn1b	protein_coding	ensembl_havana	chr6:134920401-134925513:+
77.6221	1.71384	1.89716	0.903372				ENSMUSG00000030083	11	Abtb1	protein_coding	ensembl_havana	chr6:88835914-88841984:-
77.5827	-1.39573	1.89316	-0.73725				ENSMUSG00000020484	18	Xbp1	protein_coding	ensembl_havana	chr11:5520659-5525893:+
77.5736	-2.44083	1.67808	-1.45454				ENSMUSG00000025016	10	Tm9sf3	protein_coding	ensembl	chr19:41210842-41264004:-
77.5274	1.57906	2.05811	0.767237				ENSMUSG00000028480	14	Glipr2	protein_coding	ensembl_havana	chr4:43957401-43979118:+
77.5059	3.23039	1.79689	1.79776	0.0722148	0.199029	7.14632	ENSMUSG00000024197	9	Plin3	protein_coding	ensembl	chr17:56278962-56290511:-
77.4828	3.41233	2.20224	1.54948				ENSMUSG00000026849	18	Tor1a	protein_coding	ensembl_havana	chr2:30960627-30967933:-
77.4154	0.576694	1.43769	0.401126	0.688327	0.735303	6.5981	ENSMUSG00000040746	15	Rnf167	protein_coding	ensembl_havana	chr11:70647235-70651421:+
77.2673	2.97704	1.59045	1.87182				ENSMUSG00000049999	4	Ppp1r3d	protein_coding	ensembl_havana	chr2:178411206-178414472:-
77.1437	9.10833	2.21984	4.10316				ENSMUSG00000049362	6	Olfr173	protein_coding	ensembl_havana	chr16:58795207-58800268:-
77.1311	0.966342	1.30635	0.739727	0.459465	0.605915	6.51356	ENSMUSG00000060802	8	B2m	protein_coding	ensembl_havana	chr2:122147686-122153083:+
77.1175	4.58734	1.87453	2.4472				ENSMUSG00000045180	13	Shroom2	protein_coding	ensembl_havana	chrX:152609509-152769465:-
77.032	-0.92387	2.00794	-0.460108				ENSMUSG00000021242	8	Npc2	protein_coding	ensembl	chr12:84754560-84773112:-
76.8884	1.1756	1.37821	0.852987	0.393667	0.556396	6.51356	ENSMUSG00000059146	12	Ntrk3	protein_coding	ensembl_havana	chr7:78175959-78738012:-
76.6612	3.46247	1.66104	2.08452	0.0371132	0.135472	7.14632	ENSMUSG00000024927	7	Rela	protein_coding	ensembl_havana	chr19:5637483-5648130:+
76.4126	-1.68906	1.61335	-1.04693	0.295131	0.473343	6.41147	ENSMUSG00000061410	6	Zcchc14	protein_coding	ensembl_havana	chr8:121598703-121652901:-
76.3995	-0.80813	1.49174	-0.541736	0.588001	0.661825	7.14632	ENSMUSG00000023025	15	Larp4	protein_coding	ensembl	chr15:99970074-100016351:+
76.09	-6.02068	1.93463	-3.11206				ENSMUSG00000003233	11	Dvl3	protein_coding	ensembl_havana	chr16:20516982-20532520:+
75.9645	3.13191	1.76831	1.77113	0.0765384	0.217083	6.41147	ENSMUSG00000032050	17	Rdx	protein_coding	ensembl_havana	chr9:52047173-52088735:+
75.9623	6.34785	2.11005	3.00838				ENSMUSG00000031490	6	Eif4ebp1	protein_coding	ensembl_havana	chr8:27260329-27276674:+
75.9533	2.31855	1.61135	1.43889	0.150181	0.318917	6.51356	ENSMUSG00000045103	17	Dmd	protein_coding	ensembl_havana	chrX:82948870-85206141:+
75.9473	-3.34319	1.41957	-2.35507	0.0185195	0.0902016	7.14632	ENSMUSG00000047193	16	Dync2h1	protein_coding	ensembl_havana	chr9:6928503-7184446:-
75.94	2.56179	1.93609	1.32318	0.185777	0.373419	6.07075	ENSMUSG00000075132	2	Olfr1173	protein_coding	ensembl_havana	chr2:88273040-88279875:-
75.6672	-4.08633	2.16378	-1.88852				ENSMUSG00000036306	13	Lzts1	protein_coding	ensembl_havana	chr8:69132669-69184225:-
75.665	3.69185	1.40988	2.61855				ENSMUSG00000027168	21	Pax6	protein_coding	ensembl_havana	chr2:105668900-105697364:+
75.5341	1.80664	1.87638	0.962833				ENSMUSG00000078676	9	Casc3	protein_coding	ensembl_havana	chr11:98804905-98833814:+
75.4714	1.42644	2.18127	0.65395				ENSMUSG00000060935	6	Tmem263	protein_coding	ensembl_havana	chr10:85102627-85120618:+
75.445	-0.392136	2.09794	-0.186915				ENSMUSG00000025647	16	Shisa5	protein_coding	ensembl_havana	chr9:109038565-109057777:+
75.4187	2.98275	1.58708	1.8794	0.0601896	0.189753	6.51356	ENSMUSG00000053965	10	Pde5a	protein_coding	ensembl_havana	chr3:122728947-122859374:+
75.3123	3.17103	1.29112	2.45603				ENSMUSG00000064210	6	Ano6	protein_coding	ensembl	chr15:95790843-95975464:+
75.2719	2.1099	1.63578	1.28984	0.197105	0.386815	6.07075	ENSMUSG00000031605	8	Klhl2	protein_coding	ensembl_havana	chr8:64739675-64850017:-
75.142	0.59316	1.19904	0.494694	0.620816	0.714164	6.41147	ENSMUSG00000095562	7	Gm21887	protein_coding	ensembl	chrX:170009659-170019281:+
75.1247	-2.72688	1.78191	-1.53032				ENSMUSG00000026074	14	Map4k4	protein_coding	ensembl_havana	chr1:39900913-40026310:+
75.1219	-2.65893	2.03365	-1.30746				ENSMUSG00000029918	9	Mrps33	protein_coding	ensembl_havana	chr6:39801804-39810988:-
75.1146	-5.9351	1.64747	-3.60255				ENSMUSG00000055675	6	Kbtbd11	protein_coding	ensembl_havana	chr8:15011025-15033333:+
75.0644	2.27601	2.69296	0.84517				ENSMUSG00000075068	3	Olfr140	protein_coding	ensembl_havana	chr2:90049380-90063594:-
75.0507	-9.81404	2.92622	-3.35383				ENSMUSG00000053719	10	Klk1b26	protein_coding	ensembl_havana	chr7:44012168-44016968:+
75.0427	3.67065	1.61748	2.26937				ENSMUSG00000032405	10	Pias1	protein_coding	ensembl_havana	chr9:62878368-62987924:-
75.0423	-5.51962	1.94289	-2.84094				ENSMUSG00000055415	7	Atp10b	protein_coding	ensembl_havana	chr11:43149877-43262285:+
74.999	-2.67181	1.71632	-1.55671				ENSMUSG00000029178	14	Klf3	protein_coding	ensembl_havana	chr5:64803388-64832901:+
74.9979	7.01345	2.5781	2.72039				ENSMUSG00000021764	6	Ndufs4	protein_coding	ensembl	chr13:114287795-114388094:-
74.7675	-1.11192	1.06624	-1.04284	0.297022	0.489408	6.07075	ENSMUSG00000075465	2	Gm10837	protein_coding	ensembl	chr14:122490586-122492121:+
74.6398	-4.01217	2.11184	-1.89984				ENSMUSG00000049037	8	Clec4a1	protein_coding	ensembl_havana	chr6:122921848-122934619:+
74.4125	8.3226	2.02966	4.1005	4.12267e-05	0.00257584	6.51356	ENSMUSG00000030603	16	Psmc4	protein_coding	ensembl_havana	chr7:28041707-28050101:-
74.3353	1.81202	1.59608	1.13529	0.256253	0.447326	6.07075	ENSMUSG00000028431	11	Ikbkap	protein_coding	ensembl_havana	chr4:56749680-56802331:-
74.2069	5.56267	2.06766	2.69033				ENSMUSG00000020235	16	Fzr1	protein_coding	ensembl_havana	chr10:81366222-81378516:-
74.1178	-0.805609	2.34414	-0.34367				ENSMUSG00000041921	16	Metap1d	protein_coding	ensembl_havana	chr2:71453276-71525194:+
73.9887	4.0605	1.60467	2.53043				ENSMUSG00000035566	6	Pcdh17	protein_coding	ensembl	chr14:84443563-84537060:+
73.9855	-1.40914	1.04833	-1.34418	0.178892	0.348199	6.51356	ENSMUSG00000046245	13	Pilra	protein_coding	ensembl_havana	chr5:137821952-137836281:-
73.9323	7.87484	2.59135	3.0389				ENSMUSG00000090949	1	Vmn2r77	protein_coding	ensembl_havana	chr7:86795141-86812032:+
73.8295	2.95414	1.56099	1.89248				ENSMUSG00000001105	15	Ift20	protein_coding	ensembl_havana	chr11:78536361-78541737:+
73.7494	1.37191	2.25968	0.607128	0.543766	0.662332	6.5981	ENSMUSG00000024647	14	Cbln2	protein_coding	ensembl_havana	chr18:86711110-86718283:+
73.7166	4.77494	2.07139	2.30518				ENSMUSG00000001415	10	Smg5	protein_coding	ensembl_havana	chr3:88336260-88362338:+
73.6597	0.443039	2.12428	0.20856				ENSMUSG00000037364	11	Srrt	protein_coding	ensembl_havana	chr5:137295704-137307674:-
73.6143	0.0879083	0.906826	0.0969406	0.922774	0.888263	6.07075	ENSMUSG00000034781	5	Gna11	protein_coding	ensembl_havana	chr10:81528724-81545190:-
73.5715	2.11862	1.44907	1.46206				ENSMUSG00000053477	16	Tcf4	protein_coding	ensembl_havana	chr18:69343356-69689079:+
73.498	-0.908814	1.39257	-0.652616	0.514004	0.671208	6.07075	ENSMUSG00000041836	10	Ptpre	protein_coding	ensembl_havana	chr7:135537481-135686293:+
73.4935	6.79724	1.98973	3.41617				ENSMUSG00000078937	8	Cpt1b	protein_coding	ensembl_havana	chr15:89416405-89425863:-
73.3617	-5.42935	1.96682	-2.76047				ENSMUSG00000031782	15	Coq9	protein_coding	ensembl_havana	chr8:94838321-94854895:+
73.2925	-5.47693	1.91938	-2.85349	0.00432422	0.0386244	7.14632	ENSMUSG00000054400	16	Cklf	protein_coding	ensembl_havana	chr8:104250861-104264938:+
73.2725	-8.89763	2.36957	-3.75496				ENSMUSG00000019464	6	Ptger1	protein_coding	ensembl_havana	chr8:83666678-83672753:+
73.2152	0.0916091	2.2592	0.0405494	0.967655	0.91828	6.07075	ENSMUSG00000020078	15	Vps26a	protein_coding	ensembl	chr10:62454843-62486805:-
73.1716	-8.15015	2.49525	-3.26626				ENSMUSG00000057933	10	Gsta2	protein_coding	ensembl_havana	chr9:78331018-78355788:-
73.1037	4.31245	2.2272	1.93627				ENSMUSG00000049233	6	Apoo-ps	protein_coding	ensembl	chr13:107413865-107414767:-
73.0436	3.59301	2.45851	1.46146				ENSMUSG00000020614	13	Fam20a	protein_coding	ensembl_havana	chr11:109669749-109722279:-
72.9894	-1.84557	1.67316	-1.10304				ENSMUSG00000060126	14	Tpt1	protein_coding	ensembl_havana	chr14:75845093-75848525:+
72.9359	5.88471	2.19202	2.6846				ENSMUSG00000025977	15	Boll	protein_coding	ensembl_havana	chr1:55248658-55363469:-
72.8693	23.2277	2.87224	8.08694				ENSMUSG00000021606	7	Ndufs6	protein_coding	ensembl_havana	chr13:73319874-73328542:-
72.8417	-7.24016	1.8955	-3.81965				ENSMUSG00000034652	12	Cd300a	protein_coding	ensembl_havana	chr11:114890041-114904654:+
72.5672	5.89695	2.17251	2.71434				ENSMUSG00000091873	2	Olfr732	protein_coding	ensembl_havana	chr14:50278473-50284206:-
72.5436	0.334983	1.65188	0.202788	0.839301	0.81257	6.51356	ENSMUSG00000002111	8	Spi1	protein_coding	ensembl_havana	chr2:91082390-91115756:+
72.5315	4.80761	1.74097	2.76144				ENSMUSG00000043131	14	Mob1a	protein_coding	ensembl_havana	chr6:83326016-83343776:+
72.4422	0.958442	1.63146	0.587476	0.556884	0.670602	6.5981	ENSMUSG00000030142	10	Clec4e	protein_coding	ensembl_havana	chr6:123281789-123289870:-
72.4397	-1.90154	1.43196	-1.32793	0.184201	0.358074	6.41147	ENSMUSG00000048874	15	Phf3	protein_coding	ensembl_havana	chr1:30802339-30873921:-
72.3871	4.3351	1.89121	2.29224				ENSMUSG00000075318	12	Scn2a	protein_coding	ensembl_havana	chr2:65620771-65767447:+
72.353	0.705292	1.83932	0.383452	0.701384	0.745927	6.51356	ENSMUSG00000028034	15	Fubp1	protein_coding	ensembl_havana	chr3:152210422-152236826:+
72.3337	1.97371	1.66761	1.18356	0.236588	0.409853	6.51356	ENSMUSG00000028273	15	Pdlim5	protein_coding	ensembl_havana	chr3:142239590-142395696:-
72.2192	-4.35745	1.30596	-3.33658	0.000848156	0.0158111	6.41147	ENSMUSG00000045991	18	Onecut2	protein_coding	ensembl_havana	chr18:64340364-64398488:+
72.2077	-0.226119	1.51552	-0.149202	0.881394	0.794632	7.14632	ENSMUSG00000024104	11	Fam21	protein_coding	ensembl_havana	chr6:116208038-116262686:+
72.1688	5.28952	1.80477	2.93086				ENSMUSG00000031966	7	Glb1l3	protein_coding	ensembl_havana	chr9:26817953-26860890:-
72.1281	4.69826	1.93195	2.43187				ENSMUSG00000045034	12	Ankrd34b	protein_coding	ensembl_havana	chr13:92425896-92441658:+
72.07	1.02604	1.38913	0.73862	0.460138	0.629786	6.07075	ENSMUSG00000048154	16	Kmt2d	protein_coding	ensembl_havana	chr15:98831669-98871204:-
72.0536	-0.817107	2.0008	-0.40839	0.682987	0.742318	6.41147	ENSMUSG00000021939	7	Ctsb	protein_coding	ensembl	chr14:63122462-63145919:+
72.0182	2.77715	1.3044	2.12905	0.0332497	0.135472	6.41147	ENSMUSG00000033671	18	Cep350	protein_coding	ensembl_havana	chr1:155844964-155973255:-
71.9568	4.9626	1.76836	2.80634				ENSMUSG00000051985	12	Igfn1	protein_coding	ensembl_havana	chr1:135953578-136006342:-
71.9145	5.63728	1.95123	2.8891				ENSMUSG00000030284	11	Creld1	protein_coding	ensembl_havana	chr6:113483297-113493343:+
71.8842	-3.39358	1.53285	-2.21389				ENSMUSG00000027070	14	Lrp2	protein_coding	ensembl_havana	chr2:69424340-69586065:-
71.8106	-5.1217	1.88755	-2.7134				ENSMUSG00000027243	8	Harbi1	protein_coding	ensembl_havana	chr2:91710852-91721545:+
71.7654	-1.0772	2.0194	-0.533428	0.593738	0.690652	6.5981	ENSMUSG00000109542	1	Olfr470	protein_coding	ensembl_havana	chr7:107844786-107845731:-
71.5535	0.292124	2.12937	0.137188				ENSMUSG00000031601	16	Cnot7	protein_coding	ensembl_havana	chr8:40492540-40515847:-
71.5011	4.05122	1.55745	2.60119	0.00928999	0.0640581	6.51356	ENSMUSG00000056300	14	Zfp981	protein_coding	ensembl_havana	chr4:146502027-146539395:+
71.4884	5.89411	2.02403	2.91207	0.00359043	0.0372907	6.41147	ENSMUSG00000022295	7	Atp6v1c1	protein_coding	ensembl	chr15:38661904-38692443:+
71.4552	5.08457	2.07616	2.44903				ENSMUSG00000059995	12	Atxn7l3	protein_coding	ensembl_havana	chr11:102289300-102296631:-
71.3944	3.35948	1.59617	2.10471	0.0353167	0.138868	6.51356	ENSMUSG00000031309	15	Rps6ka3	protein_coding	ensembl_havana	chrX:159210307-159368244:+
71.2848	6.1187	2.12017	2.88595				ENSMUSG00000040283	14	Btnl9	protein_coding	ensembl_havana	chr11:49165585-49187159:-
71.1125	1.52698	1.71936	0.888106				ENSMUSG00000020859	16	Spag9	protein_coding	ensembl_havana	chr11:93996091-94126085:+
71.1095	0.133141	1.18292	0.112554	0.910385	0.842229	6.5981	ENSMUSG00000027346	15	Gpcpd1	protein_coding	ensembl_havana	chr2:132529082-132587729:-
71.0455	5.56479	2.2298	2.49565				ENSMUSG00000024359	8	Hspa9	protein_coding	ensembl_havana	chr18:34937414-34954357:-
71.0104	3.3937	1.6358	2.07464	0.0380196	0.150737	6.07075	ENSMUSG00000065954	11	Tacc1	protein_coding	ensembl_havana	chr8:25154552-25256588:-
70.9714	-1.07438	1.85862	-0.578055	0.563227	0.642976	7.14632	ENSMUSG00000020577	15	Tspan13	protein_coding	ensembl_havana	chr12:36014557-36042500:-
70.9436	4.283	1.77203	2.417				ENSMUSG00000032580	12	Rbm5	protein_coding	ensembl_havana	chr9:107740371-107770996:-
70.9136	3.29376	1.5674	2.10142	0.0356038	0.13974	6.51356	ENSMUSG00000063894	14	Zkscan8	protein_coding	ensembl_havana	chr13:21513222-21531120:-
70.8884	0.0988574	1.58777	0.0622618				ENSMUSG00000035992	15	Fnip1	protein_coding	ensembl_havana	chr11:54438199-54518235:+
70.8389	1.60255	2.37249	0.675474				ENSMUSG00000023964	15	Calcr	protein_coding	ensembl_havana	chr6:3685680-3764714:-
70.8267	-2.90616	1.42334	-2.04179	0.0411727	0.158864	6.07075	ENSMUSG00000063065	13	Mapk3	protein_coding	ensembl_havana	chr7:126759601-126765819:+
70.6548	4.25218	1.45518	2.9221	0.00347676	0.0375966	6.07075	ENSMUSG00000030313	15	Dennd5b	protein_coding	ensembl_havana	chr6:148988071-149101680:-
70.619	-0.471923	2.00393	-0.235499				ENSMUSG00000026283	13	Ing5	protein_coding	ensembl_havana	chr1:93803965-93822101:+
70.5833	0.107389	1.77612	0.0604626	0.951787	0.859854	6.5981	ENSMUSG00000013878	18	Rnf170	protein_coding	ensembl_havana	chr8:26119368-26151790:+
70.5516	-3.82905	2.16229	-1.77083				ENSMUSG00000031201	17	Brcc3	protein_coding	ensembl_havana	chrX:75416628-75454001:+
70.5286	-5.19035	1.7906	-2.89866	0.00374757	0.0375966	6.51356	ENSMUSG00000019370	10	Calm3	protein_coding	ensembl_havana	chr7:16915379-16924114:-
70.3895	0.931559	1.43728	0.648142	0.516893	0.645563	6.51356	ENSMUSG00000030213	12	Atf7ip	protein_coding	ensembl_havana	chr6:136506167-136610862:+
70.3533	-0.529017	1.53262	-0.345171	0.729966	0.762469	6.51356	ENSMUSG00000030265	14	Kras	protein_coding	ensembl_havana	chr6:145216699-145250239:-
70.3243	1.97324	2.49027	0.792377				ENSMUSG00000028923	14	Necap2	protein_coding	ensembl_havana	chr4:141066512-141078357:-
70.2753	5.78459	2.30562	2.50891				ENSMUSG00000017999	16	Ddx27	protein_coding	ensembl_havana	chr2:167015193-167034947:+
70.0188	1.13939	2.17599	0.523617				ENSMUSG00000031264	13	Btk	protein_coding	ensembl_havana	chrX:134542336-134583570:-
69.9631	4.78789	1.89627	2.5249				ENSMUSG00000022297	14	Fzd6	protein_coding	ensembl	chr15:39006280-39038186:+
69.8726	3.2222	1.92115	1.67722	0.0934985	0.247787	6.41147	ENSMUSG00000001687	15	Ubl3	protein_coding	ensembl_havana	chr5:148504635-148552789:-
69.8654	0.170757	0.921275	0.185349	0.852956	0.847743	6.07075	ENSMUSG00000057098	14	Ebf1	protein_coding	ensembl_havana	chr11:44617317-45008091:+
69.7856	5.36666	2.18693	2.45396				ENSMUSG00000001288	14	Rarg	protein_coding	ensembl_havana	chr15:102234938-102257517:-
69.7609	-1.70916	2.02528	-0.843915				ENSMUSG00000044617	7	Zbtb39	protein_coding	ensembl	chr10:127739538-127747335:+
69.7443	4.97618	1.62295	3.06613				ENSMUSG00000021327	18	Zkscan3	protein_coding	ensembl_havana	chr13:21387013-21402755:-
69.6203	0.873795	2.10492	0.415121				ENSMUSG00000042742	7	Bmt2	protein_coding	ensembl_havana	chr6:13625673-13677966:-
69.5929	2.76717	1.78865	1.54707	0.121846	0.296316	6.07075	ENSMUSG00000039578	16	Ccser1	protein_coding	ensembl_havana	chr6:61180324-62382865:+
69.5774	5.86325	2.03951	2.87484	0.00404236	0.0387436	6.51356	ENSMUSG00000047824	13	Pygo2	protein_coding	ensembl_havana	chr3:89430214-89435128:+
69.5578	2.18231	1.49578	1.45898				ENSMUSG00000070565	11	Rasal2	protein_coding	ensembl_havana	chr1:157135182-157412595:-
69.5454	0.93756	1.43655	0.652645	0.513985	0.611784	7.14632	ENSMUSG00000038712	16	Fam63a	protein_coding	ensembl_havana	chr3:95281345-95296166:+
69.5359	1.58819	1.54437	1.02837				ENSMUSG00000031715	14	Smarca5	protein_coding	ensembl_havana	chr8:80698507-80739497:-
69.2735	1.82573	1.27893	1.42754	0.153423	0.325199	6.41147	ENSMUSG00000052085	6	Dock8	protein_coding	ensembl	chr19:24999529-25202432:+
69.225	0.100484	1.38223	0.072697	0.942047	0.853967	6.5981	ENSMUSG00000034595	17	Ppp1r18	protein_coding	ensembl_havana	chr17:35865593-35875596:+
69.1737	6.30469	2.38158	2.64727				ENSMUSG00000021660	14	Btf3	protein_coding	ensembl_havana	chr13:98309896-98317006:-
69.0895	-5.68262	1.67415	-3.39434	0.000687951	0.0138034	6.51356	ENSMUSG00000026473	15	Glul	protein_coding	ensembl_havana	chr1:153899944-153909723:+
69.0582	-5.10885	1.86908	-2.73335	0.00626928	0.0516503	6.41147	ENSMUSG00000025572	17	Tmc6	protein_coding	ensembl_havana	chr11:117765988-117782198:-
68.9982	0.529748	1.96342	0.269809	0.787307	0.813777	6.07075	ENSMUSG00000059923	13	Grb2	protein_coding	ensembl_havana	chr11:115644045-115708597:-
68.9455	-2.60752	2.30145	-1.13299				ENSMUSG00000030410	16	Dmwd	protein_coding	ensembl_havana	chr7:19076227-19082776:+
68.7656	2.92234	2.2722	1.28612				ENSMUSG00000040272	14	Accs	protein_coding	ensembl_havana	chr2:93833467-93849943:-
68.6529	-0.398718	2.04971	-0.194524	0.845765	0.845093	6.07075	ENSMUSG00000063120	4	Olfr480	protein_coding	ensembl_havana	chr7:108064878-108067346:-
68.602	3.47974	1.52257	2.28544				ENSMUSG00000055632	17	Hmcn2	protein_coding	ensembl_havana	chr2:31314415-31460738:+
68.5463	3.76565	1.93782	1.94324				ENSMUSG00000013160	7	Atp6v0d1	protein_coding	ensembl_havana	chr8:105524465-105566047:-
68.5041	-4.2525	1.6434	-2.58762				ENSMUSG00000021500	15	Ddx46	protein_coding	ensembl	chr13:55635027-55681256:+
68.4922	-6.06429	2.26856	-2.67319				ENSMUSG00000024759	13	Atl3	protein_coding	ensembl	chr19:7494040-7538608:+
68.4606	7.06204	2.05287	3.44008				ENSMUSG00000000627	15	Sema4f	protein_coding	ensembl_havana	chr6:82911885-82939769:-
68.3227	1.26376	1.64435	0.768545	0.442163	0.615263	6.07075	ENSMUSG00000025362	5	Rps26	protein_coding	ensembl	chr10:128624530-128626506:-
68.3111	-1.83948	1.63267	-1.12667	0.259882	0.451122	6.07075	ENSMUSG00000056498	13	Tmem154	protein_coding	ensembl_havana	chr3:84666192-84704575:+
68.3009	3.30312	1.78646	1.84897	0.0644621	0.195452	6.5981	ENSMUSG00000024491	15	Rbm27	protein_coding	ensembl	chr18:42275353-42341542:+
68.2887	1.90628	1.52685	1.2485	0.211847	0.403299	6.07075	ENSMUSG00000043716	13	Rpl7	protein_coding	ensembl_havana	chr1:16101295-16104662:-
68.1385	-0.0192398	2.12914	-0.00903639				ENSMUSG00000003380	11	Rabac1	protein_coding	ensembl_havana	chr7:24969752-24972754:-
68.0839	6.56265	2.55114	2.57244				ENSMUSG00000079263	8	Gm6614	protein_coding	ensembl_havana	chr6:141971845-142011414:-
68.0294	2.39209	2.7194	0.879638				ENSMUSG00000051200	3	Olfr513	protein_coding	ensembl_havana	chr7:108750973-108756800:+
67.9749	1.80241	1.91714	0.94016				ENSMUSG00000045078	12	Rnf216	protein_coding	ensembl_havana	chr5:142990893-143112994:-
67.928	-4.78973	1.46554	-3.26825	0.00108216	0.0181273	6.41147	ENSMUSG00000075254	11	Heg1	protein_coding	ensembl_havana	chr16:33684466-33771576:+
67.9147	9.57419	3.00106	3.19027				ENSMUSG00000070530	5	Wfdc16	protein_coding	ensembl_havana	chr2:164634707-164638796:-
67.8599	4.60207	1.60086	2.87476	0.00404338	0.039974	6.07075	ENSMUSG00000052752	15	Traf7	protein_coding	ensembl_havana	chr17:24508562-24527938:-
67.8106	-4.35606	1.39321	-3.12663				ENSMUSG00000030894	5	Tpp1	protein_coding	ensembl_havana	chr7:105744811-105752235:-
67.779	5.31432	2.02379	2.62593	0.00864126	0.0620823	6.5981	ENSMUSG00000020009	12	Ifngr1	protein_coding	ensembl_havana	chr10:19591949-19610229:+
67.7739	-4.70052	1.43082	-3.28521				ENSMUSG00000021738	4	Atxn7	protein_coding	ensembl	chr14:14012491-14107296:+
67.7463	6.78033	2.5239	2.68645				ENSMUSG00000020545	11	Lrrc72	protein_coding	ensembl_havana	chr12:36208345-36253398:-
67.7043	-0.855938	1.64412	-0.520607				ENSMUSG00000018076	12	Med13l	protein_coding	ensembl_havana	chr5:118560679-118765438:+
67.6701	-1.3402	1.69783	-0.789358	0.429903	0.578498	6.5981	ENSMUSG00000022314	9	Rad21	protein_coding	ensembl	chr15:51962605-51991760:-
67.5748	2.46292	2.49376	0.987636				ENSMUSG00000079508	8	Apoo	protein_coding	ensembl_havana	chrX:94367117-94417093:+
67.4798	-8.70256	2.71939	-3.20018				ENSMUSG00000091809	4	Olfr721-ps1	protein_coding	ensembl_havana	chr14:14401298-14410095:+
67.4722	6.27159	2.50662	2.50202				ENSMUSG00000108763	1	Gm36028	protein_coding	havana	chr16:37850913-37861146:-
67.4376	-0.444346	1.51716	-0.292881	0.769613	0.779318	6.51356	ENSMUSG00000000804	14	Usp32	protein_coding	ensembl_havana	chr11:84984442-85140161:-
67.2889	0.362938	2.32422	0.156155				ENSMUSG00000062007	13	Hsh2d	protein_coding	ensembl_havana	chr8:72189638-72201527:+
67.2837	1.52563	1.70017	0.897338				ENSMUSG00000038843	17	Gcnt1	protein_coding	ensembl_havana	chr19:17326141-17356667:-
67.2551	-0.196954	1.58795	-0.124031				ENSMUSG00000026740	12	Dnajc1	protein_coding	ensembl_havana	chr2:18195654-18392830:-
67.2457	9.49667	2.53294	3.74927				ENSMUSG00000034563	16	Ccpg1	protein_coding	ensembl_havana	chr9:72985429-73016340:+
67.1876	1.78379	2.06677	0.86308				ENSMUSG00000037720	16	Tmem33	protein_coding	ensembl_havana	chr5:67260565-67291461:+
67.1699	1.33142	2.42905	0.548123				ENSMUSG00000022427	3	Tomm22	protein_coding	ensembl_havana	chr15:79670861-79672862:+
66.9211	6.82417	2.52155	2.70634				ENSMUSG00000041261	9	Car8	protein_coding	ensembl_havana	chr4:8143362-8239041:-
66.8958	6.9857	2.39844	2.9126				ENSMUSG00000040891	6	Foxa3	protein_coding	ensembl_havana	chr7:19013284-19023538:-
66.8427	-5.22759	1.7204	-3.03858				ENSMUSG00000028180	18	Zranb2	protein_coding	ensembl_havana	chr3:157534160-157548410:+
66.622	2.03497	1.1535	1.76417	0.0777028	0.218858	6.41147	ENSMUSG00000079429	9	Mroh2a	protein_coding	ensembl_havana	chr1:88226986-88262289:+
66.5873	-2.79257	1.62068	-1.72309				ENSMUSG00000066415	4	Msl2	protein_coding	ensembl_havana	chr9:101074101-101104800:+
66.4768	-0.228336	1.88117	-0.12138	0.90339	0.874945	6.07075	ENSMUSG00000028410	13	Dnaja1	protein_coding	ensembl_havana	chr4:40722150-40737149:+
66.4576	-1.40888	1.70138	-0.828081				ENSMUSG00000032549	7	Rab6b	protein_coding	ensembl_havana	chr9:103111787-103185276:+
66.4239	-4.83326	1.56286	-3.09258	0.00198424	0.0233902	7.14632	ENSMUSG00000007812	16	Zfp655	protein_coding	ensembl_havana	chr5:145231715-145247302:+
66.4076	-0.20022	2.27185	-0.0881308				ENSMUSG00000057913	2	Gm10032	protein_coding	ensembl	chr14:66784529-66793758:+
66.3311	-0.412713	1.02707	-0.401835	0.687805	0.735115	6.5981	ENSMUSG00000025862	14	Stag2	protein_coding	ensembl_havana	chrX:42149317-42277185:+
66.3115	-5.86702	1.36122	-4.31012	1.63165e-05	0.00204276	6.5981	ENSMUSG00000031138	4	F9	protein_coding	ensembl_havana	chrX:59999464-60030759:+
66.2667	0.863229	1.32534	0.651328	0.514834	0.64374	6.51356	ENSMUSG00000022462	6	Slc38a2	protein_coding	ensembl	chr15:96687394-96699698:-
66.223	1.58775	1.66689	0.952526	0.34083	0.518036	6.41147	ENSMUSG00000034602	13	Mon2	protein_coding	ensembl	chr10:122992061-123076505:-
66.2212	2.92079	2.03713	1.43378				ENSMUSG00000034210	13	Efcab14	protein_coding	ensembl_havana	chr4:115737744-115777327:+
66.1592	1.5525	1.08733	1.4278	0.153349	0.320693	6.5981	ENSMUSG00000034158	9	Lrrc58	protein_coding	ensembl_havana	chr16:37868389-37888858:+
66.1236	2.15978	1.91141	1.12994	0.258503	0.409668	7.14632	ENSMUSG00000027012	15	Dync1i2	protein_coding	ensembl_havana	chr2:71211706-71263303:+
66.0669	3.39869	1.68851	2.01283				ENSMUSG00000006818	4	Sod2	protein_coding	ensembl	chr17:13007839-13018119:+
66.0537	5.6608	1.81754	3.11455				ENSMUSG00000040723	14	Rcsd1	protein_coding	ensembl_havana	chr1:165646516-165709757:-
66.0338	2.49315	1.51038	1.65068				ENSMUSG00000037410	13	Tbc1d2b	protein_coding	ensembl_havana	chr9:90202027-90270804:-
66.0306	4.82889	2.4028	2.00969				ENSMUSG00000036223	15	Ska1	protein_coding	ensembl	chr18:74195299-74207818:-
65.999	-5.31529	1.82071	-2.91936				ENSMUSG00000049755	14	Zfp672	protein_coding	ensembl_havana	chr11:58315114-58330339:-
65.8141	4.97949	2.5639	1.94216				ENSMUSG00000047632	10	Fgfbp3	protein_coding	ensembl_havana	chr19:36917550-36919615:-
65.7355	-0.480256	1.6469	-0.291613				ENSMUSG00000022587	14	Ly6e	protein_coding	ensembl_havana	chr15:74955051-74959905:+
65.6255	1.29751	1.8746	0.692152				ENSMUSG00000006344	16	Ggt5	protein_coding	ensembl_havana	chr10:75589340-75617200:+
65.611	0.882443	1.46509	0.602313	0.546966	0.690751	6.07075	ENSMUSG00000016534	15	Lamp2	protein_coding	ensembl_havana	chrX:38401357-38456454:-
65.6096	-4.41595	1.45052	-3.04439				ENSMUSG00000025571	13	Tnrc6c	protein_coding	ensembl_havana	chr11:117654289-117763439:+
65.6068	-5.83721	1.7108	-3.41199				ENSMUSG00000006998	15	Psmd2	protein_coding	ensembl_havana	chr16:20651652-20663414:+
65.6061	-5.69566	1.9998	-2.84812				ENSMUSG00000023791	15	Pigx	protein_coding	ensembl_havana	chr16:32084418-32099738:-
65.5347	6.52908	2.32467	2.8086				ENSMUSG00000024064	13	Galnt14	protein_coding	ensembl_havana	chr17:73493228-73710453:-
65.4558	-1.51209	1.51328	-0.999214	0.317691	0.485796	6.5981	ENSMUSG00000000290	13	Itgb2	protein_coding	ensembl_havana	chr10:77530252-77565708:+
65.4102	-3.02906	1.53251	-1.97653	0.0480943	0.165254	6.5981	ENSMUSG00000026335	16	Pam	protein_coding	ensembl_havana	chr1:97795114-98095646:-
65.3053	-8.05263	2.11175	-3.81326				ENSMUSG00000051498	6	Tlr6	protein_coding	ensembl_havana	chr5:64952031-64960097:-
65.1878	-0.633222	1.95604	-0.323726	0.746145	0.773241	6.41147	ENSMUSG00000027770	5	Dhx36	protein_coding	ensembl_havana	chr3:62468013-62507004:-
65.1791	4.77841	1.78756	2.67315	0.00751433	0.0538457	7.14632	ENSMUSG00000047215	14	Rpl9	protein_coding	ensembl_havana	chr5:65388364-65391444:-
65.1404	6.9647	2.31182	3.01264				ENSMUSG00000036218	15	Pdzrn4	protein_coding	ensembl	chr15:92396915-92771819:+
64.977	5.03552	1.93868	2.5974				ENSMUSG00000036928	14	Stag3	protein_coding	ensembl_havana	chr5:138280240-138312393:+
64.8841	5.1009	1.32123	3.86071	0.000113058	0.00425449	7.14632	ENSMUSG00000037685	15	Atp8a1	protein_coding	ensembl_havana	chr5:67618140-67847434:-
64.8825	2.297	1.47645	1.55576				ENSMUSG00000073077	6	Gm7173	protein_coding	ensembl_havana	chrX:79266559-79517285:-
64.8324	-4.49134	1.51715	-2.96039				ENSMUSG00000015522	18	Arnt	protein_coding	ensembl_havana	chr3:95434388-95497240:+
64.8079	-0.546478	2.07399	-0.263491	0.792172	0.795121	6.41147	ENSMUSG00000026172	12	Bcs1l	protein_coding	ensembl_havana	chr1:74588289-74592443:+
64.7989	-7.19518	2.0942	-3.43576				ENSMUSG00000005779	12	Psmb4	protein_coding	ensembl_havana	chr3:94884093-94886961:-
64.7571	-1.9003	1.81182	-1.04884	0.294252	0.468644	6.51356	ENSMUSG00000027210	20	Meis2	protein_coding	ensembl_havana	chr2:115863064-116065839:-
64.726	5.1189	1.94743	2.62855				ENSMUSG00000024999	7	Noc3l	protein_coding	ensembl	chr19:38788128-38819237:-
64.7152	5.30952	2.19159	2.42268				ENSMUSG00000063804	8	Lin28b	protein_coding	ensembl_havana	chr10:45376620-45486395:-
64.6954	5.94299	2.0126	2.95289				ENSMUSG00000020160	18	Meis1	protein_coding	ensembl_havana	chr11:18879817-19018985:-
64.6772	-1.69009	2.14712	-0.787142				ENSMUSG00000027261	2	Hao1	protein_coding	ensembl_havana	chr2:134497361-134554368:-
64.6645	0.839387	1.50466	0.557858	0.576941	0.711321	6.07075	ENSMUSG00000027782	10	Kpna4	protein_coding	ensembl_havana	chr3:69067149-69127113:-
64.6268	6.16195	1.96432	3.13693				ENSMUSG00000047649	9	Cd3eap	protein_coding	ensembl_havana	chr7:19356014-19359483:-
64.6204	-3.29411	1.51312	-2.17703				ENSMUSG00000026430	16	Rassf5	protein_coding	ensembl_havana	chr1:131176410-131245258:-
64.4997	6.11259	1.93199	3.16389	0.00155675	0.0220954	6.07075	ENSMUSG00000032959	12	Pebp1	protein_coding	ensembl_havana	chr5:117282654-117287625:-
64.4239	-7.22488	2.45884	-2.93832				ENSMUSG00000021553	13	Slc28a3	protein_coding	ensembl_havana	chr13:58545399-58610877:-
64.2961	4.37887	1.83635	2.38455	0.0171	0.0902016	6.51356	ENSMUSG00000025404	15	R3hdm2	protein_coding	ensembl_havana	chr10:127380327-127499384:+
64.2446	1.20057	2.12418	0.565192				ENSMUSG00000072791	11	Abcb5	protein_coding	ensembl_havana	chr12:118867824-118966421:-
64.2213	4.86433	2.00526	2.42579	0.0152753	0.0803519	7.14632	ENSMUSG00000046027	17	Stard5	protein_coding	ensembl_havana	chr7:83631959-83653127:+
64.2149	-7.77518	2.18463	-3.55904				ENSMUSG00000031590	8	Frg1	protein_coding	ensembl_havana	chr8:41397459-41417074:-
64.2065	3.68871	1.55187	2.37694	0.0174568	0.0869204	7.14632	ENSMUSG00000021669	14	Col4a3bp	protein_coding	ensembl	chr13:96542618-96640167:+
64.2035	4.67879	1.73905	2.69043	0.00713594	0.0522985	7.14632	ENSMUSG00000053399	9	Adamts18	protein_coding	ensembl_havana	chr8:113697126-113848738:-
64.1701	1.11021	1.86795	0.594346				ENSMUSG00000009995	17	Taz	protein_coding	ensembl_havana	chrX:74281912-74290151:+
64.0518	-0.846628	1.75101	-0.483509	0.628734	0.7329	6.07075	ENSMUSG00000056851	13	Pcbp2	protein_coding	ensembl	chr15:102470632-102500059:+
64.0507	2.58257	1.57318	1.64162				ENSMUSG00000040848	11	Sft2d2	protein_coding	ensembl_havana	chr1:165174337-165194438:-
64.0366	-3.61967	1.28473	-2.81746	0.00484048	0.0404782	7.14632	ENSMUSG00000024772	9	Ehd1	protein_coding	ensembl_havana	chr19:6276725-6300096:+
64.0057	3.08593	1.79133	1.7227				ENSMUSG00000022540	16	Rogdi	protein_coding	ensembl_havana	chr16:5008730-5013553:-
63.9709	-0.503721	2.32403	-0.216745				ENSMUSG00000068523	12	Gng5	protein_coding	ensembl_havana	chr3:146499807-146505572:+
63.9406	2.07939	1.61162	1.29024				ENSMUSG00000025949	16	Pikfyve	protein_coding	ensembl_havana	chr1:65186683-65278695:+
63.9234	-0.189698	1.83518	-0.103368	0.917671	0.847743	6.51356	ENSMUSG00000015733	13	Capza2	protein_coding	ensembl_havana	chr6:17636234-17666972:+
63.8972	-2.82768	2.0361	-1.38877				ENSMUSG00000054976	14	Nyap2	protein_coding	ensembl_havana	chr1:81076950-81341764:+
63.8683	0.54677	1.83132	0.298566	0.765271	0.772708	6.5981	ENSMUSG00000039000	8	Ube3c	protein_coding	ensembl_havana	chr5:29569242-29676092:+
63.7853	1.09064	1.36318	0.800075	0.423668	0.574223	6.5981	ENSMUSG00000096768	7	Erdr1	protein_coding	ensembl	chrY:90784738-90816464:+
63.7145	-6.09802	1.61752	-3.76997				ENSMUSG00000029022	18	Miip	protein_coding	ensembl_havana	chr4:147860778-147868816:-
63.6979	4.28691	2.38556	1.79703				ENSMUSG00000101391	2	Olfr1217	protein_coding	ensembl_havana	chr2:89021336-89032066:-
63.6809	-4.54998	1.61081	-2.82465	0.00473322	0.0454291	6.07075	ENSMUSG00000050989	9	Selenon	protein_coding	ensembl_havana	chr4:134537892-134552166:-
63.6627	5.27544	1.77337	2.97482				ENSMUSG00000047409	13	Ctdspl	protein_coding	ensembl_havana	chr9:118926453-119043998:+
63.6061	-4.5106	1.35462	-3.3298	0.000869078	0.0158111	6.5981	ENSMUSG00000001383	8	Zmat2	protein_coding	ensembl	chr18:36793923-36799660:+
63.5986	3.04443	1.65838	1.83578	0.06639	0.198739	6.5981	ENSMUSG00000027303	17	Ptpra	protein_coding	ensembl_havana	chr2:130450278-130554026:+
63.4866	-3.0814	1.45207	-2.12207				ENSMUSG00000021948	15	Prkcd	protein_coding	ensembl_havana	chr14:30595356-30626210:-
63.3235	0.321802	1.72688	0.186348	0.852172	0.81257	6.5981	ENSMUSG00000026547	15	Tagln2	protein_coding	ensembl_havana	chr1:172500047-172507380:+
63.2089	0.873845	1.92892	0.453023	0.650533	0.726508	6.41147	ENSMUSG00000039488	15	Cntn5	protein_coding	ensembl_havana	chr9:9660891-10904775:-
63.0334	5.92809	1.99284	2.97469				ENSMUSG00000040356	16	Skiv2l	protein_coding	ensembl_havana	chr17:34839228-34850210:-
63.0275	-6.85441	1.95038	-3.5144				ENSMUSG00000043090	18	Zfp866	protein_coding	ensembl_havana	chr8:69761326-69791178:-
62.9878	4.22738	1.98678	2.12776				ENSMUSG00000061665	6	Cd2ap	protein_coding	ensembl	chr17:42792951-42876424:-
62.824	7.17706	2.321	3.09223				ENSMUSG00000057770	5	Olfr668	protein_coding	ensembl_havana	chr7:104922291-104928057:-
62.7733	6.32272	1.89133	3.343				ENSMUSG00000035576	13	L3mbtl1	protein_coding	ensembl_havana	chr2:162943472-162974522:+
62.7408	5.64787	2.21823	2.54612				ENSMUSG00000049149	8	Olfr1258	protein_coding	ensembl_havana	chr2:89927309-89934509:+
62.6892	-3.60669	1.59174	-2.26587	0.0234591	0.110961	6.07075	ENSMUSG00000022000	10	Zc3h13	protein_coding	ensembl	chr14:75284373-75344426:+
62.5813	1.33755	1.63647	0.817337				ENSMUSG00000036273	15	Lrrk2	protein_coding	ensembl_havana	chr15:91673175-91816120:+
62.5714	-1.31366	2.45088	-0.535995				ENSMUSG00000050029	7	Rap2c	protein_coding	ensembl_havana	chrX:51003912-51018018:-
62.5529	-3.77461	1.50916	-2.50113	0.0123797	0.0742402	6.51356	ENSMUSG00000020941	7	Map3k14	protein_coding	ensembl_havana	chr11:103219762-103267472:-
62.518	2.08011	1.53321	1.3567	0.174875	0.358706	6.07075	ENSMUSG00000025316	16	Banp	protein_coding	ensembl_havana	chr8:121949750-122029258:+
62.514	0.242912	1.95315	0.124369				ENSMUSG00000026707	15	Nsun6	protein_coding	ensembl_havana	chr2:14995131-15055069:-
62.4906	5.39231	2.0869	2.58389	0.00976932	0.0657487	6.51356	ENSMUSG00000031532	6	Saraf	protein_coding	ensembl_havana	chr8:34154575-34170821:+
62.3859	3.3478	1.27743	2.62074	0.00877404	0.0625151	6.51356	ENSMUSG00000020642	12	Rnf144a	protein_coding	ensembl	chr12:26306797-26415256:-
62.2968	-5.49426	1.96178	-2.80066				ENSMUSG00000070823	6	Gm1043	protein_coding	ensembl_havana	chr5:37154430-37229547:+
62.2502	4.40151	1.40266	3.13796	0.00170126	0.0234662	6.07075	ENSMUSG00000034708	11	Grn	protein_coding	ensembl_havana	chr11:102430315-102437048:+
62.2302	3.63457	1.86218	1.95179				ENSMUSG00000024043	13	Arhgap28	protein_coding	ensembl_havana	chr17:67842713-68004120:-
62.2075	-1.26667	2.34214	-0.540818				ENSMUSG00000061111	8	Fam195b	protein_coding	ensembl_havana	chr11:120542888-120549727:-
62.1982	0.902733	1.42824	0.63206	0.527348	0.661825	6.41147	ENSMUSG00000032239	10	Rp9	protein_coding	ensembl_havana	chr9:22411047-22469743:-
62.1794	0.335841	1.47748	0.227306	0.820186	0.808725	6.41147	ENSMUSG00000020721	16	Helz	protein_coding	ensembl_havana	chr11:107547930-107693826:+
62.1472	4.0816	1.79939	2.26832				ENSMUSG00000032340	8	Neo1	protein_coding	ensembl_havana	chr9:58874687-59036441:-
62.132	-2.60188	0.995765	-2.61294	0.0089766	0.0638483	6.41147	ENSMUSG00000042613	9	Pbxip1	protein_coding	ensembl_havana	chr3:89436706-89450952:+
62.1001	-3.59996	1.46781	-2.45261				ENSMUSG00000059303	6	Olfr836	protein_coding	ensembl_havana	chr9:19120382-19125938:+
62.0866	-4.1437	1.18668	-3.49184	0.000479712	0.0117789	6.41147	ENSMUSG00000026313	16	Hdac4	protein_coding	ensembl_havana	chr1:91928779-92195699:-
62.0698	1.47084	1.88288	0.781166				ENSMUSG00000055436	18	Srsf11	protein_coding	ensembl_havana	chr3:158010473-158036639:-
62.0643	0.0718717	1.58857	0.0452429	0.963914	0.865643	6.5981	ENSMUSG00000066036	14	Ubr4	protein_coding	ensembl_havana	chr4:139352609-139489588:+
61.939	6.3962	1.90129	3.36413				ENSMUSG00000031938	15	4931406C07Rik	protein_coding	ensembl_havana	chr9:15283337-15306448:-
61.8852	-6.17727	1.76827	-3.49341				ENSMUSG00000032513	8	Gorasp1	protein_coding	ensembl_havana	chr9:119925257-119937565:-
61.8754	0.0648842	1.78321	0.0363862				ENSMUSG00000046229	9	Scand1	protein_coding	ensembl	chr2:156311847-156312704:-
61.8613	0.795636	1.57512	0.505126	0.61347	0.725427	6.07075	ENSMUSG00000031103	12	Elf4	protein_coding	ensembl_havana	chrX:48411046-48463132:-
61.8337	1.86365	1.77997	1.04701				ENSMUSG00000022371	15	Col14a1	protein_coding	ensembl_havana	chr15:55307750-55520803:+
61.8273	1.34532	1.60861	0.836329	0.40297	0.536054	7.14632	ENSMUSG00000025484	9	Bet1l	protein_coding	ensembl_havana	chr7:140853394-140857577:-
61.811	-5.96418	1.96974	-3.02791				ENSMUSG00000023926	7	Rhag	protein_coding	ensembl_havana	chr17:40811126-40840754:+
61.8035	-2.8528	1.69922	-1.67889	0.0931741	0.254553	6.07075	ENSMUSG00000026361	9	Cdc73	protein_coding	ensembl_havana	chr1:143598800-143702893:-
61.7974	4.7509	1.85174	2.56564	0.0102987	0.0699796	6.07075	ENSMUSG00000022119	15	Rbm26	protein_coding	ensembl_havana	chr14:105106751-105177327:-
61.7005	-0.604079	1.83183	-0.329767				ENSMUSG00000032640	10	Chsy1	protein_coding	ensembl_havana	chr7:66109515-66173798:+
61.6334	5.07602	2.3578	2.15286				ENSMUSG00000041710	4	Trpc5	protein_coding	ensembl_havana	chrX:144381671-144688180:-
61.5974	-3.83943	1.47534	-2.6024	0.00925729	0.0662242	6.07075	ENSMUSG00000039967	14	Zfp292	protein_coding	ensembl_havana	chr4:34803113-34882960:-
61.5907	-5.0804	1.69554	-2.99634				ENSMUSG00000053838	14	Nudcd3	protein_coding	ensembl_havana	chr11:6105691-6200415:-
61.5748	5.48788	2.09442	2.62024				ENSMUSG00000028998	6	Tomm7	protein_coding	ensembl_havana	chr5:23838944-23844161:-
61.5605	7.29891	2.36347	3.08822				ENSMUSG00000029397	15	Rchy1	protein_coding	ensembl_havana	chr5:91948904-91963068:-
61.5559	4.0996	1.58749	2.58245	0.00981028	0.067862	6.07075	ENSMUSG00000064065	15	Ipcef1	protein_coding	ensembl_havana	chr10:6885796-7052478:-
61.5473	4.0828	1.5667	2.60598				ENSMUSG00000034297	14	Med13	protein_coding	ensembl_havana	chr11:86267033-86357602:-
61.5293	-7.02608	2.01191	-3.49225				ENSMUSG00000020805	14	Slc13a5	protein_coding	ensembl_havana	chr11:72241989-72267222:-
61.4094	-2.08711	1.89707	-1.10018	0.271256	0.441399	6.5981	ENSMUSG00000020372	15	Rack1	protein_coding	ensembl_havana	chr11:48800332-48806434:+
61.4013	0.259564	1.69966	0.152715				ENSMUSG00000015312	8	Gadd45b	protein_coding	ensembl	chr10:80930091-80932204:+
61.3998	4.24068	1.86687	2.27155				ENSMUSG00000005621	11	Zfp592	protein_coding	ensembl_havana	chr7:80993681-81045164:+
61.3634	0.141027	1.74884	0.0806405	0.935728	0.896985	6.07075	ENSMUSG00000045969	8	Ing1	protein_coding	ensembl_havana	chr8:11555571-11563251:+
61.3224	0.00647051	1.79785	0.00359903	0.997128	0.884602	6.5981	ENSMUSG00000002458	13	Rgs19	protein_coding	ensembl_havana	chr2:181688419-181693977:-
61.2035	-2.15319	2.13314	-1.0094	0.312783	0.506446	6.07075	ENSMUSG00000048799	7	Cep120	protein_coding	ensembl	chr18:53681724-53744547:-
61.1656	-0.918236	1.89294	-0.485084	0.627617	0.711321	6.5981	ENSMUSG00000019302	16	Atp6v0a1	protein_coding	ensembl_havana	chr11:101009452-101063719:+
61.0397	2.80545	1.50131	1.86866				ENSMUSG00000028763	17	Hspg2	protein_coding	ensembl_havana	chr4:137468769-137570630:+
61.0175	2.49679	2.27161	1.09913				ENSMUSG00000025287	15	Acot9	protein_coding	ensembl_havana	chrX:155262443-155297654:+
61.0164	-0.251726	1.99171	-0.126387	0.899426	0.802242	7.14632	ENSMUSG00000028362	2	Tnfsf8	protein_coding	ensembl_havana	chr4:63831308-63861347:-
60.9775	1.93446	1.39694	1.38479	0.166117	0.336144	6.41147	ENSMUSG00000027790	14	Sis	protein_coding	ensembl_havana	chr3:72888557-72967863:-
60.9607	-6.5342	2.03744	-3.20707				ENSMUSG00000032551	7	1110059G10Rik	protein_coding	ensembl_havana	chr9:122945089-122951000:-
60.9442	-3.52512	2.05442	-1.71587				ENSMUSG00000042520	16	Ubap2l	protein_coding	ensembl_havana	chr3:90000140-90052628:-
60.8606	5.02712	2.33611	2.15192				ENSMUSG00000054452	9	Aes	protein_coding	ensembl	chr10:81559494-81566362:+
60.5827	5.29699	2.10648	2.51462				ENSMUSG00000041957	15	Pkp2	protein_coding	ensembl_havana	chr16:16213318-16272712:+
60.5651	-9.29897	2.6464	-3.51382				ENSMUSG00000038736	9	Nudcd1	protein_coding	ensembl	chr15:44375227-44428307:-
60.5618	-1.92103	1.60931	-1.1937				ENSMUSG00000031165	6	Was	protein_coding	ensembl_havana	chrX:8081453-8090498:-
60.5054	4.57318	2.25091	2.0317				ENSMUSG00000055933	13	Oosp3	protein_coding	ensembl_havana	chr19:11697055-11711874:+
60.4643	1.05174	1.84565	0.569848	0.568781	0.679411	6.51356	ENSMUSG00000007038	5	Neu1	protein_coding	ensembl_havana	chr17:34931253-34935953:+
60.3585	4.77703	2.2783	2.09675				ENSMUSG00000019877	10	Serinc1	protein_coding	ensembl_havana	chr10:57515774-57532530:-
60.3343	2.05308	1.51786	1.35261				ENSMUSG00000007617	17	Homer1	protein_coding	ensembl_havana	chr13:93303757-93404129:+
60.2673	5.49467	2.17965	2.52089				ENSMUSG00000024479	2	Mal2	protein_coding	ensembl	chr15:54571366-54602846:+
60.2506	1.33249	0.995239	1.33886	0.180615	0.332483	7.14632	ENSMUSG00000032097	10	Ddx6	protein_coding	ensembl_havana	chr9:44604892-44640731:+
60.2328	4.49003	2.25108	1.99461	0.0460855	0.164239	6.41147	ENSMUSG00000053317	11	Sec61b	protein_coding	ensembl_havana	chr4:47474658-47483242:+
60.0781	-2.14863	2.39833	-0.895883				ENSMUSG00000025509	15	Pnpla2	protein_coding	ensembl_havana	chr7:141455198-141460743:+
60.0457	-0.735418	1.52091	-0.483537	0.628714	0.712184	6.5981	ENSMUSG00000041870	16	Ankrd13a	protein_coding	ensembl_havana	chr5:114774677-114806200:+
60.0438	-1.06802	1.44736	-0.737911	0.460569	0.603424	6.5981	ENSMUSG00000027287	14	Snap23	protein_coding	ensembl_havana	chr2:120567671-120601255:+
60.006	-4.6752	1.52763	-3.06042	0.00221024	0.0266584	6.51356	ENSMUSG00000042404	16	Dennd4b	protein_coding	ensembl_havana	chr3:90265185-90280669:+
60.0016	-0.971126	1.90586	-0.509548				ENSMUSG00000062627	9	Mysm1	protein_coding	ensembl_havana	chr4:94942040-94979100:-
59.9802	0.317233	1.60553	0.197588	0.843367	0.813767	6.51356	ENSMUSG00000024083	15	Pja2	protein_coding	ensembl_havana	chr17:64281005-64331916:-
59.9399	5.26436	1.59981	3.29061	0.000999697	0.0179907	6.07075	ENSMUSG00000020102	15	Slc16a7	protein_coding	ensembl_havana	chr10:125219270-125389465:-
59.9313	7.01186	2.32911	3.01054				ENSMUSG00000026484	13	Rnf2	protein_coding	ensembl_havana	chr1:151458004-151500955:-
59.8418	1.12611	2.20948	0.509672				ENSMUSG00000045658	16	Pid1	protein_coding	ensembl_havana	chr1:84036296-84364180:-
59.7714	4.51318	2.03977	2.21259				ENSMUSG00000025900	12	Rp1	protein_coding	ensembl_havana	chr1:3999557-4409241:-
59.7586	-1.31909	2.23973	-0.588949				ENSMUSG00000032621	8	Srek1	protein_coding	ensembl_havana	chr13:103739348-103774608:-
59.6527	5.02916	2.01336	2.49789				ENSMUSG00000014763	7	Fam120b	protein_coding	ensembl	chr17:15396246-15433580:+
59.6176	6.05637	2.58851	2.33971				ENSMUSG00000023930	13	Crisp2	protein_coding	ensembl_havana	chr17:40764734-40807003:-
59.5084	3.6105	1.59084	2.26956				ENSMUSG00000038872	9	Zfhx3	protein_coding	ensembl_havana	chr8:108703100-108961630:+
59.4635	-5.72999	1.70912	-3.3526				ENSMUSG00000025453	16	Nnt	protein_coding	ensembl_havana	chr13:119335448-119408997:-
59.3934	0.789578	2.11866	0.372677	0.709389	0.722237	7.14632	ENSMUSG00000036469	16	March1	protein_coding	ensembl_havana	chr8:65617900-66471637:+
59.3842	-1.99831	1.91127	-1.04554	0.295775	0.443167	7.14632	ENSMUSG00000015757	10	Ppil4	protein_coding	ensembl_havana	chr10:7792891-7823135:+
59.3639	1.07796	1.90466	0.565957				ENSMUSG00000034893	7	Cog3	protein_coding	ensembl	chr14:75702351-75754493:-
59.3016	-3.60162	1.5037	-2.39518				ENSMUSG00000020409	10	Slu7	protein_coding	ensembl_havana	chr11:43433744-43447981:+
59.2973	0.64403	1.68022	0.383301	0.701497	0.771993	6.07075	ENSMUSG00000029422	14	Rsrc2	protein_coding	ensembl_havana	chr5:123728426-123749414:-
59.1986	3.18251	2.2269	1.42912				ENSMUSG00000008690	15	Ncaph2	protein_coding	ensembl_havana	chr15:89355719-89372826:+
59.1264	-2.95534	1.69215	-1.74649				ENSMUSG00000055805	14	Fmnl1	protein_coding	ensembl_havana	chr11:103171107-103198901:+
59.1176	3.41496	1.45698	2.34387	0.0190851	0.095473	6.41147	ENSMUSG00000037234	17	Hook3	protein_coding	ensembl_havana	chr8:26021421-26119224:-
59.0854	0.645678	1.38282	0.466929	0.640551	0.689839	7.14632	ENSMUSG00000060445	11	Sycp2	protein_coding	ensembl_havana	chr2:178345293-178407685:-
59.0623	6.20683	2.47132	2.51155				ENSMUSG00000022863	14	Btg3	protein_coding	ensembl_havana	chr16:78359860-78377192:-
58.9944	2.12401	2.29243	0.926533				ENSMUSG00000033938	5	Ndufb7	protein_coding	ensembl_havana	chr8:83566671-83571626:+
58.9887	-2.06356	1.64578	-1.25385				ENSMUSG00000026103	14	Gls	protein_coding	ensembl_havana	chr1:52163448-52233232:-
58.9455	-1.70038	2.8816	-0.59008				ENSMUSG00000054453	11	Sytl5	protein_coding	ensembl_havana	chrX:9885622-9994543:+
58.9283	-3.59694	1.97425	-1.82193	0.0684659	0.210002	6.07075	ENSMUSG00000024803	8	Ankrd1	protein_coding	ensembl	chr19:36111965-36119844:-
58.8707	3.7019	1.73743	2.13068				ENSMUSG00000052934	14	Fbxo31	protein_coding	ensembl_havana	chr8:121549440-121578806:-
58.8657	2.41998	2.24191	1.07943				ENSMUSG00000011958	17	Bnip2	protein_coding	ensembl_havana	chr9:69989466-70008317:+
58.8149	-5.77939	1.99708	-2.89392				ENSMUSG00000028099	8	Polr3c	protein_coding	ensembl_havana	chr3:96711490-96727628:-
58.7897	7.86555	2.29095	3.43332				ENSMUSG00000015053	14	Gata2	protein_coding	ensembl_havana	chr6:88193891-88207032:+
58.7562	5.91178	2.07162	2.8537				ENSMUSG00000036257	14	Pnpla8	protein_coding	ensembl_havana	chr12:44221370-44312343:+
58.7555	7.21965	2.34169	3.08309				ENSMUSG00000020332	7	Meikin	protein_coding	ensembl_havana	chr11:54370652-54426790:+
58.7502	-3.27464	1.78113	-1.83852				ENSMUSG00000034731	9	Dgkh	protein_coding	ensembl	chr14:78569609-78725089:-
58.7415	-1.88705	1.48871	-1.26758	0.204949	0.383701	6.41147	ENSMUSG00000039456	9	Morc3	protein_coding	ensembl_havana	chr16:93832121-93876072:+
58.7282	-0.660134	1.58951	-0.415307	0.677917	0.734693	6.51356	ENSMUSG00000045382	6	Cxcr4	protein_coding	ensembl_havana	chr1:128588199-128592293:-
58.6507	-2.50174	1.37821	-1.8152	0.0694928	0.20678	6.41147	ENSMUSG00000005417	17	Mprip	protein_coding	ensembl_havana	chr11:59661305-59780860:+
58.624	3.61909	1.87094	1.93437				ENSMUSG00000023873	12	1700010I14Rik	protein_coding	ensembl_havana	chr17:8988333-9008319:+
58.6095	3.92336	1.6177	2.42527	0.0152972	0.0852211	6.5981	ENSMUSG00000038538	17	Ubn2	protein_coding	ensembl_havana	chr6:38433950-38524825:+
58.594	2.56044	2.19406	1.16699				ENSMUSG00000052384	13	Nrros	protein_coding	ensembl_havana	chr16:32142785-32165594:-
58.5429	-3.30269	1.57165	-2.10142	0.0356044	0.132455	7.14632	ENSMUSG00000037400	17	Atp11b	protein_coding	ensembl_havana	chr3:35754106-35856276:+
58.5221	4.85013	1.50521	3.22223				ENSMUSG00000090665	1	Gad1-ps	protein_coding	ensembl	chr10:99443730-99447007:+
58.5207	7.4942	2.3022	3.25523				ENSMUSG00000020519	5	Sap30l	protein_coding	ensembl_havana	chr11:57801637-57810217:+
58.4301	3.8186	1.53594	2.48616	0.012913	0.0728195	7.14632	ENSMUSG00000069833	12	Ahnak	protein_coding	ensembl	chr19:8989284-9076919:+
58.3269	5.84079	2.10903	2.76942				ENSMUSG00000006403	12	Adamts4	protein_coding	ensembl_havana	chr1:171250421-171260637:+
58.2836	4.93379	2.35855	2.09187				ENSMUSG00000029221	15	Slc30a9	protein_coding	ensembl_havana	chr5:67306955-67358443:+
58.2806	-4.38799	1.71151	-2.56382				ENSMUSG00000024597	10	Slc12a2	protein_coding	ensembl	chr18:57878678-57946821:+
58.202	6.43009	1.80419	3.56397	0.000365288	0.0103189	6.51356	ENSMUSG00000023307	13	March5	protein_coding	ensembl_havana	chr19:37207543-37222139:+
58.1852	5.64708	2.15224	2.62382				ENSMUSG00000028898	15	Trnau1ap	protein_coding	ensembl_havana	chr4:132311763-132329538:-
58.0861	7.51427	2.50652	2.99789				ENSMUSG00000091260	1	Vmn2r19	protein_coding	ensembl_havana	chr6:123308333-123336537:+
58.0812	-5.98342	2.02633	-2.95283				ENSMUSG00000010803	13	Gabra1	protein_coding	ensembl_havana	chr11:42130939-42182930:-
58.0506	5.45332	1.91344	2.85001	0.00437181	0.0387095	7.14632	ENSMUSG00000030145	14	Zfp248	protein_coding	ensembl_havana	chr6:118427319-118455528:-
57.9517	-2.98795	1.33497	-2.23821				ENSMUSG00000050772	2	Olfr1124	protein_coding	ensembl_havana	chr2:87430275-87436623:+
57.943	4.24683	1.6974	2.50197	0.0123504	0.0739422	6.5981	ENSMUSG00000109336	1	Samd4b	protein_coding	ensembl_havana	chr7:28399522-28598144:-
57.929	2.96112	2.25165	1.31509				ENSMUSG00000048764	16	Tmprss11f	protein_coding	ensembl_havana	chr5:86521898-86632424:-
57.9249	9.34173	2.74565	3.40237				ENSMUSG00000079703	12	Ssxb8	protein_coding	ensembl_havana	chrX:8684887-8690844:-
57.9144	-0.390253	1.75627	-0.222205				ENSMUSG00000020074	6	Ccar1	protein_coding	ensembl	chr10:62743928-62792368:-
57.8752	0.142725	2.25957	0.0631647	0.949635	0.905418	6.07075	ENSMUSG00000059023	2	Olfr1201	protein_coding	ensembl_havana	chr2:88793036-88796827:+
57.8453	1.3285	1.21694	1.09168	0.274976	0.423348	7.14632	ENSMUSG00000021000	15	Mia2	protein_coding	ensembl_havana	chr12:59129720-59191583:+
57.76	2.37012	1.7738	1.33618	0.181489	0.351148	6.51356	ENSMUSG00000020272	8	Stk10	protein_coding	ensembl_havana	chr11:32533305-32624587:+
57.7427	6.32833	2.76911	2.28534				ENSMUSG00000038879	7	Nipal2	protein_coding	ensembl	chr15:34572799-34678706:-
57.6666	0.00399082	1.27796	0.00312281	0.997508	0.902881	6.41147	ENSMUSG00000029063	16	Nadk	protein_coding	ensembl_havana	chr4:155562378-155591001:+
57.6664	4.58512	1.98955	2.3046	0.0211887	0.095473	7.14632	ENSMUSG00000021125	6	Arg2	protein_coding	ensembl_havana	chr12:79130777-79156301:+
57.6646	-0.123861	1.25619	-0.0986012	0.921455	0.849294	6.51356	ENSMUSG00000052040	10	Klf13	protein_coding	ensembl_havana	chr7:63886351-63938915:-
57.6515	5.37379	1.74511	3.07934	0.00207458	0.0240211	7.14632	ENSMUSG00000027176	8	Cstf3	protein_coding	ensembl_havana	chr2:104590523-104665429:+
57.6327	-4.53897	2.02011	-2.24689				ENSMUSG00000024076	9	Vit	protein_coding	ensembl	chr17:78508063-78627409:+
57.5888	1.96147	2.13046	0.92068				ENSMUSG00000027834	15	Serpini1	protein_coding	ensembl_havana	chr3:75557547-75643495:+
57.5849	-1.89878	1.93646	-0.980541				ENSMUSG00000019998	5	Stx7	protein_coding	ensembl	chr10:24149317-24188959:+
57.5759	-0.420446	1.48753	-0.282648	0.777446	0.788689	6.41147	ENSMUSG00000031627	9	Irf2	protein_coding	ensembl_havana	chr8:46739732-46847458:+
57.5724	3.16751	1.57131	2.01583	0.0438175	0.159018	6.41147	ENSMUSG00000031010	17	Usp9x	protein_coding	ensembl_havana	chrX:13071498-13173328:+
57.4463	1.69005	1.65833	1.01913				ENSMUSG00000014599	10	Csf1	protein_coding	ensembl_havana	chr3:107741048-107760469:-
57.44	-5.53374	1.8408	-3.00616	0.00264571	0.0282905	7.14632	ENSMUSG00000007036	15	Abhd16a	protein_coding	ensembl_havana	chr17:35089263-35102987:+
57.4193	4.5226	1.97703	2.28757	0.0221625	0.0972372	7.14632	ENSMUSG00000024066	8	Xdh	protein_coding	ensembl	chr17:73883908-73950182:-
57.4127	5.69481	1.99106	2.86019				ENSMUSG00000036622	15	Atp13a2	protein_coding	ensembl_havana	chr4:140986873-141007330:+
57.2885	4.58076	1.75929	2.60376				ENSMUSG00000063358	15	Mapk1	protein_coding	ensembl_havana	chr16:16983382-17047453:+
57.2706	-1.97934	1.61833	-1.22308	0.2213	0.409853	6.07075	ENSMUSG00000030754	9	Copb1	protein_coding	ensembl_havana	chr7:114215559-114254711:-
57.207	1.57918	1.74489	0.905032				ENSMUSG00000049744	15	Arhgap15	protein_coding	ensembl_havana	chr2:43748824-44395953:+
57.1567	4.65563	1.9266	2.41649				ENSMUSG00000059588	13	Calcrl	protein_coding	ensembl_havana	chr2:84330626-84425411:-
57.0394	-3.21251	1.65395	-1.94232				ENSMUSG00000038025	7	Phf2	protein_coding	ensembl	chr13:48801750-48870885:-
57.0197	-0.259178	1.8427	-0.140651	0.888146	0.829954	6.5981	ENSMUSG00000029647	15	Pan3	protein_coding	ensembl_havana	chr5:147430161-147548502:+
56.997	-3.2667	2.20371	-1.48236				ENSMUSG00000032000	17	Birc3	protein_coding	ensembl_havana	chr9:7848699-7873186:-
56.9415	-2.07836	2.38401	-0.871789				ENSMUSG00000059623	5	Olfr39	protein_coding	ensembl_havana	chr9:20282351-20286648:+
56.8482	4.03732	1.63416	2.47058	0.0134894	0.0795175	6.41147	ENSMUSG00000045210	8	Vcpip1	protein_coding	ensembl_havana	chr1:9718622-9748382:-
56.743	-3.53068	1.73108	-2.03958	0.0413926	0.154326	6.41147	ENSMUSG00000030704	14	Rab6a	protein_coding	ensembl_havana	chr7:100607410-100641268:+
56.6778	-0.132368	1.88681	-0.0701541				ENSMUSG00000001588	12	Acap1	protein_coding	ensembl_havana	chr11:69881567-69895539:-
56.6709	0.346081	1.86361	0.185705				ENSMUSG00000024248	13	Cox7a2l	protein_coding	ensembl	chr17:83501919-83514333:-
56.664	-1.83656	1.7897	-1.02618	0.304807	0.481747	6.41147	ENSMUSG00000042675	15	Ypel3	protein_coding	ensembl_havana	chr7:126776955-126780514:+
56.657	2.72307	1.29162	2.10826	0.0350086	0.144004	6.07075	ENSMUSG00000000560	9	Gabra2	protein_coding	ensembl_havana	chr5:70957597-71095849:-
56.6361	1.92257	1.50313	1.27904				ENSMUSG00000078578	9	Ube2d3	protein_coding	ensembl_havana	chr3:135438149-135468198:+
56.5655	6.5402	2.13821	3.05872				ENSMUSG00000004462	6	Tbccd1	protein_coding	ensembl	chr16:22813215-22857569:-
56.5494	-6.28485	2.11887	-2.96613				ENSMUSG00000030177	14	Ccdc77	protein_coding	ensembl_havana	chr6:120324323-120364374:-
56.5288	0.0549236	2.11375	0.025984				ENSMUSG00000019785	13	Clvs2	protein_coding	ensembl_havana	chr10:33512286-33624769:-
56.491	0.25774	1.68663	0.152813	0.878546	0.830748	6.51356	ENSMUSG00000035242	15	Oaz1	protein_coding	ensembl_havana	chr10:80826656-80829290:+
56.4107	0.409765	1.44374	0.283823	0.776546	0.778161	6.5981	ENSMUSG00000003119	14	Cdk12	protein_coding	ensembl_havana	chr11:98203059-98278504:+
56.4062	1.16202	1.97927	0.587094				ENSMUSG00000026150	14	Mff	protein_coding	ensembl_havana	chr1:82724890-82752394:+
56.3694	-3.01812	1.44987	-2.08165	0.0373746	0.144024	6.41147	ENSMUSG00000020647	9	Ncoa1	protein_coding	ensembl	chr12:4247363-4477182:-
56.3473	4.26466	1.91783	2.22369	0.0261694	0.106242	7.14632	ENSMUSG00000081724	4	Olfr129	protein_coding	ensembl_havana	chr17:38050857-38060079:-
56.3407	-8.19401	2.39247	-3.42492	0.000614984	0.0134062	6.07075	ENSMUSG00000035473	10	Galm	protein_coding	ensembl_havana	chr17:80127471-80185101:+
56.2905	5.67795	2.07153	2.74095				ENSMUSG00000029513	14	Prkab1	protein_coding	ensembl_havana	chr5:116013586-116024508:-
56.2798	-3.96472	2.56294	-1.54694				ENSMUSG00000029552	19	Tes	protein_coding	ensembl_havana	chr6:17065149-17105828:+
56.0513	0.712163	2.10432	0.33843				ENSMUSG00000026615	14	Eprs	protein_coding	ensembl_havana	chr1:185363044-185428360:+
55.9425	1.37495	1.46436	0.938943				ENSMUSG00000037533	18	Rapgef6	protein_coding	ensembl_havana	chr11:54522847-54699285:+
55.9385	3.24523	2.4497	1.32474				ENSMUSG00000023044	1	Csad	protein_coding	ensembl	chr15:102176998-102189043:-
55.9364	-5.5148	1.33136	-4.14224	3.43926e-05	0.00257584	6.41147	ENSMUSG00000038070	15	Cntln	protein_coding	ensembl_havana	chr4:84884309-85131921:+
55.8587	1.48673	1.79237	0.829478	0.406834	0.537548	7.14632	ENSMUSG00000064351	1	mt-Co1	protein_coding	insdc	chrM:5328-6872:+
55.8027	1.75821	1.29017	1.36278	0.172953	0.356988	6.07075	ENSMUSG00000034390	16	Cmip	protein_coding	ensembl_havana	chr8:117257064-117459430:+
55.769	-5.53677	1.58936	-3.48365	0.000494632	0.0117789	6.5981	ENSMUSG00000025702	15	March8	protein_coding	ensembl_havana	chr6:116338024-116409540:+
55.7688	4.19918	2.32962	1.80252				ENSMUSG00000075090	4	Olfr1234	protein_coding	ensembl_havana	chr2:89360013-89364865:-
55.7379	0.896206	1.57027	0.570735				ENSMUSG00000053641	9	Dennd4a	protein_coding	ensembl_havana	chr9:64811340-64919667:+
55.6929	-3.46218	1.49008	-2.32348	0.0201532	0.0963791	6.5981	ENSMUSG00000021758	13	Ddx4	protein_coding	ensembl	chr13:112598333-112652310:-
55.6569	4.96417	1.78328	2.78373				ENSMUSG00000047141	5	Zfp654	protein_coding	ensembl_havana	chr16:64780347-64851652:-
55.6024	9.22081	2.34247	3.93637				ENSMUSG00000095658	1	Vmn2r-ps130	protein_coding	havana	chr17:23061367-23077425:+
55.5897	0.742679	1.94557	0.381728				ENSMUSG00000004328	15	Hif3a	protein_coding	ensembl_havana	chr7:17031507-17062427:-
55.5745	-0.157106	1.12831	-0.139239	0.889261	0.86593	6.07075	ENSMUSG00000038056	15	Kmt2c	protein_coding	ensembl_havana	chr5:25271798-25498783:-
55.5648	-1.19507	1.46077	-0.818106	0.413297	0.540661	7.14632	ENSMUSG00000075595	9	Zfp652	protein_coding	ensembl_havana	chr11:95712673-95835115:+
55.5558	3.58206	1.77862	2.01395				ENSMUSG00000034007	10	Scaper	protein_coding	ensembl_havana	chr9:55549879-55938119:-
55.5442	-4.30451	1.69122	-2.54521				ENSMUSG00000052942	13	Glis3	protein_coding	ensembl_havana	chr19:28258851-28680077:-
55.447	-7.47825	1.77302	-4.2178				ENSMUSG00000028447	11	Dctn3	protein_coding	ensembl_havana	chr4:41714798-41723170:-
55.3785	6.02252	1.89802	3.17305	0.00150844	0.0212769	6.41147	ENSMUSG00000021608	14	Lpcat1	protein_coding	ensembl_havana	chr13:73467197-73516422:+
55.3736	2.65918	1.53862	1.72829	0.0839354	0.225752	6.5981	ENSMUSG00000047945	6	Marcksl1	protein_coding	ensembl_havana	chr4:129513581-129515985:+
55.3561	-0.74542	1.95821	-0.380664				ENSMUSG00000001158	13	Snrnp27	protein_coding	ensembl_havana	chr6:86675151-86684522:-
55.3432	0.25587	0.947554	0.270032	0.787136	0.793021	6.41147	ENSMUSG00000052915	14	Msl1	protein_coding	ensembl_havana	chr11:98795516-98807859:+
55.3088	0.798885	1.7498	0.456559				ENSMUSG00000033952	14	Aspm	protein_coding	ensembl_havana	chr1:139454772-139494091:+
55.2398	-3.02593	2.11595	-1.43006				ENSMUSG00000027531	16	Impa1	protein_coding	ensembl_havana	chr3:10311956-10331439:-
55.1604	1.70165	1.85417	0.917741				ENSMUSG00000022801	13	Lrch3	protein_coding	ensembl_havana	chr16:32914100-33015647:+
54.9752	-5.20309	2.03241	-2.56006				ENSMUSG00000068876	14	Cgn	protein_coding	ensembl_havana	chr3:94760069-94786492:-
54.9694	3.37033	1.67337	2.01409				ENSMUSG00000026927	17	Sdccag3	protein_coding	ensembl_havana	chr2:26382802-26389316:-
54.9604	1.28103	1.69838	0.754265	0.45069	0.567879	7.14632	ENSMUSG00000020733	3	Slc9a3r1	protein_coding	ensembl_havana	chr11:115163341-115181181:+
54.96	2.3714	1.70137	1.39381	0.163374	0.333938	6.41147	ENSMUSG00000079477	9	Rab7	protein_coding	ensembl_havana	chr6:87999106-88045270:-
54.9329	-0.517232	1.94621	-0.265763	0.790421	0.815013	6.07075	ENSMUSG00000028639	14	Ybx1	protein_coding	ensembl_havana	chr4:119277981-119294604:-
54.927	-2.61526	1.43259	-1.82555	0.0679178	0.192333	7.14632	ENSMUSG00000030657	11	Xylt1	protein_coding	ensembl_havana	chr7:117380979-117673580:+
54.9038	2.60307	1.56696	1.66122	0.0966689	0.247978	6.5981	ENSMUSG00000061601	15	Pclo	protein_coding	ensembl_havana	chr5:14514918-14863459:+
54.8828	4.41723	1.64036	2.69284	0.0070846	0.055384	6.41147	ENSMUSG00000063632	6	Sox11	protein_coding	ensembl_havana	chr12:27334264-27342574:-
54.8361	2.58557	1.45862	1.77262	0.0762923	0.214669	6.51356	ENSMUSG00000031278	12	Acsl4	protein_coding	ensembl_havana	chrX:142317993-142390535:-
54.7834	6.28067	2.35305	2.66917				ENSMUSG00000095608	2	Olfr247	protein_coding	ensembl_havana	chr10:129973831-129976140:-
54.763	-3.09832	1.92668	-1.60811				ENSMUSG00000032691	14	Nlrp3	protein_coding	ensembl_havana	chr11:59541568-59566956:+
54.7254	3.63667	2.01006	1.80923				ENSMUSG00000060090	16	Rp2	protein_coding	ensembl_havana	chrX:20364481-20405653:+
54.7045	5.76097	2.36033	2.44075				ENSMUSG00000021403	2	Serpinb9b	protein_coding	ensembl_havana	chr13:33027416-33041884:+
54.6782	5.79182	1.86318	3.10856				ENSMUSG00000027615	14	Hps3	protein_coding	ensembl_havana	chr3:19995945-20035315:-
54.6626	3.7651	1.62887	2.31148	0.0208065	0.0978975	6.5981	ENSMUSG00000058407	12	Txndc9	protein_coding	ensembl_havana	chr1:37985189-37997893:-
54.6305	-5.71675	2.20184	-2.59635				ENSMUSG00000039232	11	Stx11	protein_coding	ensembl	chr10:12939983-12964259:-
54.4646	2.33203	1.70552	1.36734				ENSMUSG00000045302	13	Preb	protein_coding	ensembl_havana	chr5:30950853-30960361:-
54.4363	6.12613	2.08157	2.94303				ENSMUSG00000018433	14	Nol11	protein_coding	ensembl_havana	chr11:107166663-107189381:-
54.4152	1.10157	2.44019	0.451427				ENSMUSG00000027199	14	Gatm	protein_coding	ensembl_havana	chr2:122594467-122611303:-
54.3952	0.157879	1.50152	0.105146				ENSMUSG00000026222	16	Sp100	protein_coding	ensembl_havana	chr1:85649988-85709998:+
54.3774	0.967241	1.71723	0.563256	0.57326	0.709656	6.07075	ENSMUSG00000045083	14	Lingo2	protein_coding	ensembl_havana	chr4:35706647-36951747:-
54.3472	-4.37682	1.32876	-3.29391	0.000988051	0.0171069	6.51356	ENSMUSG00000021986	7	Amer2	protein_coding	ensembl	chr14:60378286-60381003:+
54.3329	3.62037	1.62796	2.22387				ENSMUSG00000055013	15	Agap1	protein_coding	ensembl_havana	chr1:89454806-89897617:+
54.3102	9.15436	2.30537	3.97088				ENSMUSG00000071180	4	Smim15	protein_coding	ensembl	chr13:108046424-108049146:+
54.296	4.70222	1.9604	2.3986				ENSMUSG00000056076	13	Eif3b	protein_coding	ensembl_havana	chr5:140419328-140443360:+
54.2597	2.46641	2.30841	1.06844				ENSMUSG00000055401	14	Fbxo6	protein_coding	ensembl_havana	chr4:148145716-148152140:-
54.1622	5.25498	1.99763	2.63061				ENSMUSG00000020326	7	Ccng1	protein_coding	ensembl_havana	chr11:40748552-40755311:-
54.1354	0.804989	2.74095	0.29369				ENSMUSG00000038871	5	Bpgm	protein_coding	ensembl_havana	chr6:34476207-34505613:+
54.0905	-6.9384	2.48457	-2.79259				ENSMUSG00000050612	5	Txndc2	protein_coding	ensembl	chr17:65637505-65642204:-
53.9695	0.614551	1.8159	0.338427	0.735041	0.732059	7.14632	ENSMUSG00000075552	4	Cyp3a41b	protein_coding	ensembl_havana	chr5:145558664-145584730:-
53.9686	3.9365	1.74828	2.25164				ENSMUSG00000029754	13	Dlx6	protein_coding	ensembl_havana	chr6:6863334-6868568:+
53.9675	-5.45287	2.05605	-2.65211				ENSMUSG00000025981	13	Coq10b	protein_coding	ensembl_havana	chr1:55052770-55072702:+
53.966	-2.16281	1.73353	-1.24763	0.212166	0.384487	6.5981	ENSMUSG00000020134	13	Peli1	protein_coding	ensembl_havana	chr11:21091291-21150323:+
53.8698	3.99489	1.58458	2.5211				ENSMUSG00000040123	16	Zmym5	protein_coding	ensembl_havana	chr14:56790585-56811716:-
53.8462	5.09589	1.7731	2.87399				ENSMUSG00000030000	10	Add2	protein_coding	ensembl_havana	chr6:86028681-86124409:+
53.8191	1.42259	1.16211	1.22414	0.2209	0.393445	6.5981	ENSMUSG00000030798	15	Cd37	protein_coding	ensembl_havana	chr7:45233632-45239115:-
53.7385	1.5166	2.41907	0.626933				ENSMUSG00000039783	15	Kmo	protein_coding	ensembl_havana	chr1:175620381-175662116:+
53.6846	-0.292864	1.44893	-0.202124	0.83982	0.81257	6.51356	ENSMUSG00000042608	15	Stk40	protein_coding	ensembl_havana	chr4:126103957-126141029:+
53.6688	5.18118	1.66301	3.11555				ENSMUSG00000003068	16	Stk11	protein_coding	ensembl_havana	chr10:80115803-80130682:+
53.6572	22.9878	2.89	7.95427				ENSMUSG00000028264	16	Spaca1	protein_coding	ensembl_havana	chr4:34024874-34050191:-
53.6553	2.21793	1.66376	1.33309				ENSMUSG00000024052	17	Lpin2	protein_coding	ensembl_havana	chr17:71182560-71249817:+
53.6483	5.05536	1.80383	2.80257				ENSMUSG00000042496	18	Prdm10	protein_coding	ensembl_havana	chr9:31280538-31381723:+
53.5907	-6.10961	2.3173	-2.63652				ENSMUSG00000029660	10	Tex26	protein_coding	ensembl_havana	chr5:149439660-149470979:+
53.566	1.11997	1.53595	0.729167	0.4659	0.606155	6.5981	ENSMUSG00000054843	8	Atrnl1	protein_coding	ensembl	chr19:57611034-58133338:+
53.487	-4.12638	1.73658	-2.37616				ENSMUSG00000068323	12	Slc4a5	protein_coding	ensembl_havana	chr6:83219828-83304945:+
53.4402	4.33351	1.85847	2.33176				ENSMUSG00000041415	9	Dicer1	protein_coding	ensembl	chr12:104687742-104751952:-
53.4311	-8.26152	2.26003	-3.6555				ENSMUSG00000029862	15	Clcn1	protein_coding	ensembl_havana	chr6:42286685-42315756:+
53.3938	1.68021	1.57024	1.07003	0.284604	0.433061	7.14632	ENSMUSG00000039159	16	Ube2h	protein_coding	ensembl_havana	chr6:30211289-30304539:-
53.2631	-6.41715	2.63202	-2.43811				ENSMUSG00000019834	15	Slc22a16	protein_coding	ensembl_havana	chr10:40570336-40604132:+
53.2032	3.4878	1.86549	1.86965				ENSMUSG00000033319	5	Fem1c	protein_coding	ensembl_havana	chr18:46501746-46525971:-
53.19	4.5947	2.08751	2.20104				ENSMUSG00000071454	13	Dtnb	protein_coding	ensembl_havana	chr12:3572381-3781796:+
53.142	-0.330014	1.82168	-0.18116	0.856242	0.784045	7.14632	ENSMUSG00000029328	15	Hnrnpdl	protein_coding	ensembl_havana	chr5:100033577-100039664:-
53.0916	2.13062	1.85958	1.14576	0.251896	0.405251	7.14632	ENSMUSG00000032487	8	Ptgs2	protein_coding	ensembl_havana	chr1:150100031-150108227:+
53.0403	4.73513	1.44224	3.28317	0.00102648	0.0181273	6.07075	ENSMUSG00000101436	1	Gm5157	protein_coding	havana	chr7:21184317-21190423:-
52.9815	9.18208	2.53553	3.62137				ENSMUSG00000086316	8	2210013O21Rik	protein_coding	havana	chrX:153723590-153741920:+
52.9671	3.09276	1.54171	2.00607				ENSMUSG00000029505	17	Ep400	protein_coding	ensembl_havana	chr5:110664373-110770717:-
52.9614	4.12084	1.77188	2.32568				ENSMUSG00000040242	14	Fgfr1op2	protein_coding	ensembl_havana	chr6:146577203-146599198:+
52.9444	4.05109	1.8718	2.16427				ENSMUSG00000027087	11	Itgav	protein_coding	ensembl_havana	chr2:83724397-83806916:+
52.9172	-1.35102	1.53346	-0.881028	0.378303	0.565491	6.07075	ENSMUSG00000057193	8	Slc44a2	protein_coding	ensembl_havana	chr9:21320698-21355028:+
52.8935	-7.34749	2.1091	-3.48372				ENSMUSG00000039765	15	Cc2d2a	protein_coding	ensembl_havana	chr5:43662346-43740972:+
52.8861	-0.152499	1.72932	-0.0881847				ENSMUSG00000021745	13	Ptprg	protein_coding	ensembl_havana	chr14:11553532-12242041:+
52.8752	-1.19503	1.96121	-0.609334				ENSMUSG00000033991	8	Ttc37	protein_coding	ensembl	chr13:76098734-76187983:+
52.8622	1.56782	1.77913	0.881227				ENSMUSG00000026135	17	Zfp142	protein_coding	ensembl_havana	chr1:74565127-74588246:-
52.7942	-5.78702	1.82837	-3.16513				ENSMUSG00000046991	9	Wdr27	protein_coding	ensembl	chr17:14829331-14934653:-
52.7669	22.0907	2.66041	8.30352				ENSMUSG00000072726	3	Gm5797	protein_coding	ensembl_havana	chr14:7323988-7332395:-
52.7384	2.28295	2.47613	0.921984				ENSMUSG00000109547	2	Olfr1294	protein_coding	ensembl_havana	chr2:111536530-111540291:-
52.6933	3.21156	2.18174	1.47201				ENSMUSG00000026021	15	Sumo1	protein_coding	ensembl_havana	chr1:59586558-59670834:-
52.6149	9.14303	2.53479	3.60701				ENSMUSG00000057609	6	Lce1a1	protein_coding	ensembl_havana	chr3:92646535-92648307:-
52.5987	-8.1049	2.25066	-3.60112				ENSMUSG00000081234	2	Olfr1150-ps1	protein_coding	ensembl_havana	chr2:87354815-87361786:+
52.5173	1.37961	1.2639	1.09155	0.275033	0.447326	6.51356	ENSMUSG00000067851	11	Arfgef1	protein_coding	ensembl_havana	chr1:10137571-10232670:-
52.5056	6.31892	2.07585	3.04402				ENSMUSG00000067780	3	Pi15	protein_coding	ensembl_havana	chr1:17601901-17630939:+
52.4846	-5.978	2.20878	-2.70648				ENSMUSG00000025357	7	Dgka	protein_coding	ensembl	chr10:128720141-128744056:-
52.4286	-5.33246	1.9101	-2.79171				ENSMUSG00000022214	14	Dcaf11	protein_coding	ensembl_havana	chr14:55560006-55570065:+
52.4163	2.63443	1.91704	1.37422				ENSMUSG00000051695	6	Pcbp1	protein_coding	ensembl_havana	chr6:86524492-86526321:-
52.4033	-4.05207	1.88741	-2.1469				ENSMUSG00000029502	14	Golga3	protein_coding	ensembl_havana	chr5:110176701-110226470:+
52.3954	4.42475	1.90807	2.31897				ENSMUSG00000031871	9	Cdh5	protein_coding	ensembl_havana	chr8:104101625-104144511:+
52.3589	5.65978	1.99036	2.8436				ENSMUSG00000010592	8	Dazl	protein_coding	ensembl	chr17:50279394-50293599:-
52.3428	-3.7484	1.41224	-2.65423				ENSMUSG00000069601	13	Ank3	protein_coding	ensembl_havana	chr10:69533772-70027438:+
52.3054	-4.05439	2.40447	-1.68619				ENSMUSG00000079941	1	Gm11273	protein_coding	havana	chr13:21501029-21501418:-
52.2916	-0.371965	1.52528	-0.243867	0.807334	0.795444	6.51356	ENSMUSG00000025332	14	Kdm5c	protein_coding	ensembl_havana	chrX:152233020-152274535:+
52.2699	3.64598	1.55276	2.34806				ENSMUSG00000031816	15	Mthfsd	protein_coding	ensembl_havana	chr8:121091628-121108392:-
52.246	7.32543	1.90352	3.84836	0.000118911	0.00481683	6.51356	ENSMUSG00000036356	15	Csgalnact1	protein_coding	ensembl_havana	chr8:68356781-68735146:-
52.2371	4.55575	1.89511	2.40395				ENSMUSG00000111448	1	Olfr912	protein_coding	ensembl_havana	chr9:38580178-38584767:+
52.2306	-4.85291	1.89885	-2.55571				ENSMUSG00000024563	15	Smad2	protein_coding	ensembl_havana	chr18:76241580-76305731:+
52.2189	2.75906	1.5172	1.81852				ENSMUSG00000021870	17	Slmap	protein_coding	ensembl_havana	chr14:26413168-26534931:-
52.2092	2.41335	1.72403	1.39983				ENSMUSG00000075551	4	Cyp3a41a	protein_coding	ensembl_havana	chr5:145694049-145720136:-
52.1884	-0.0532553	1.78444	-0.0298443	0.976191	0.924614	6.07075	ENSMUSG00000051316	8	Taf7	protein_coding	ensembl_havana	chr18:37640491-37644204:-
52.1883	-6.36579	2.46977	-2.57748				ENSMUSG00000028646	16	Rragc	protein_coding	ensembl_havana	chr4:123917446-123936997:+
52.1655	2.41273	1.70981	1.41111				ENSMUSG00000044103	4	Il1f9	protein_coding	ensembl_havana	chr2:24186476-24193568:+
52.1631	-5.23967	1.78891	-2.92898	0.00340079	0.0327818	7.14632	ENSMUSG00000003037	16	Rab8a	protein_coding	ensembl_havana	chr8:72161200-72183904:+
52.1608	-5.2591	1.86928	-2.81344				ENSMUSG00000022684	14	Bfar	protein_coding	ensembl_havana	chr16:13671858-13703612:+
52.1156	5.09712	2.13864	2.38335				ENSMUSG00000029703	10	Lrwd1	protein_coding	ensembl_havana	chr5:136122772-136136074:-
52.109	-4.03976	1.53587	-2.63027				ENSMUSG00000032594	11	Ip6k1	protein_coding	ensembl_havana	chr9:108002501-108048782:+
52.0921	-3.544	1.67536	-2.11537				ENSMUSG00000030695	14	Aldoa	protein_coding	ensembl_havana	chr7:126795234-126809108:-
52.0753	0.184025	2.13522	0.0861856				ENSMUSG00000040396	12	Abhd13	protein_coding	ensembl_havana	chr8:9977707-9992155:+
52.0632	3.21093	1.81339	1.77068				ENSMUSG00000063229	15	Ldha	protein_coding	ensembl_havana	chr7:46841475-46855627:+
52.0607	5.16267	2.06758	2.49697				ENSMUSG00000037787	13	Apopt1	protein_coding	ensembl_havana	chr12:111713261-111754980:+
52.003	-1.86052	1.32593	-1.40317	0.160565	0.330781	6.41147	ENSMUSG00000040782	12	Rfwd2	protein_coding	ensembl_havana	chr1:159232320-159347640:+
51.9105	0.462826	1.91009	0.242306				ENSMUSG00000028759	13	Hp1bp3	protein_coding	ensembl_havana	chr4:138216296-138244683:+
51.8727	-4.84935	1.85559	-2.61338				ENSMUSG00000027981	14	Rnpc3	protein_coding	ensembl_havana	chr3:113605067-113630149:-
51.8689	1.86785	1.81807	1.02738	0.304241	0.473775	6.5981	ENSMUSG00000060373	14	Hnrnpc	protein_coding	ensembl	chr14:52073380-52104028:-
51.8407	-4.1629	1.82617	-2.27958				ENSMUSG00000040797	16	Iqsec3	protein_coding	ensembl_havana	chr6:121372933-121473678:-
51.8098	4.56347	1.74013	2.62249				ENSMUSG00000031622	16	Sin3b	protein_coding	ensembl_havana	chr8:72723285-72758201:+
51.8092	5.25833	2.52165	2.08527				ENSMUSG00000081225	3	Cyp2j12	protein_coding	ensembl_havana	chr4:96099318-96141152:-
51.7552	4.31353	1.62625	2.65244				ENSMUSG00000048960	13	Prex2	protein_coding	ensembl_havana	chr1:10993465-11303681:+
51.7048	-7.28955	1.96069	-3.71785	0.000200924	0.007465	6.07075	ENSMUSG00000024240	13	Epc1	protein_coding	ensembl_havana	chr18:6435951-6516108:-
51.6965	3.13493	1.96568	1.59483	0.11075	0.278203	6.07075	ENSMUSG00000025898	6	Cwf19l2	protein_coding	ensembl_havana	chr9:3403592-3479236:+
51.6683	6.28608	2.47621	2.53858				ENSMUSG00000062352	13	Itgb1bp1	protein_coding	ensembl_havana	chr12:21240825-21286237:-
51.5661	1.97022	2.09282	0.941421	0.346489	0.521549	6.41147	ENSMUSG00000038181	16	Chpf2	protein_coding	ensembl_havana	chr5:24586741-24594556:+
51.5495	4.69604	1.7037	2.75638				ENSMUSG00000031133	12	Arhgef6	protein_coding	ensembl_havana	chrX:57231485-57338729:-
51.5079	3.994	1.98999	2.00705				ENSMUSG00000025781	14	Atp5c1	protein_coding	ensembl_havana	chr2:10056016-10080510:-
51.5053	3.24831	1.6373	1.98394				ENSMUSG00000056124	5	B4galt6	protein_coding	ensembl	chr18:20684599-20746404:-
51.4674	-7.3499	2.27754	-3.22713	0.00125038	0.0191496	6.5981	ENSMUSG00000107662	2	Olfr772	protein_coding	ensembl_havana	chr10:129172573-129177921:-
51.462	0.707055	1.78087	0.397028	0.691347	0.713897	7.14632	ENSMUSG00000022601	11	Zbtb11	protein_coding	ensembl_havana	chr16:55973883-56008913:+
51.4567	3.08926	1.25788	2.45593	0.0140522	0.0819496	6.41147	ENSMUSG00000038175	9	Mylip	protein_coding	ensembl	chr13:45389742-45412019:+
51.4482	-3.21596	1.7876	-1.79904				ENSMUSG00000041730	13	Prrxl1	protein_coding	ensembl_havana	chr14:32599407-32649246:+
51.4309	8.21019	2.43883	3.36645				ENSMUSG00000044014	9	Npy5r	protein_coding	ensembl_havana	chr8:66679965-66688128:-
51.3746	0.978602	1.88811	0.518298	0.60425	0.701986	6.51356	ENSMUSG00000079426	13	Arpc4	protein_coding	ensembl_havana	chr6:113378115-113390448:+
51.3733	-3.19349	1.40932	-2.26598	0.0234524	0.103552	6.5981	ENSMUSG00000052812	4	Atad2b	protein_coding	ensembl	chr12:4917404-5044047:+
51.3534	6.28497	2.51394	2.50005				ENSMUSG00000031105	16	Slc25a14	protein_coding	ensembl_havana	chrX:48623413-48662294:+
51.2195	4.57796	2.09649	2.18363				ENSMUSG00000100622	1	Gm20379	protein_coding	havana	chr13:92305980-92307183:+
51.2128	-6.58304	2.26302	-2.90896				ENSMUSG00000030432	12	Rpl28	protein_coding	ensembl_havana	chr7:4792874-4795066:+
51.0657	4.94772	1.93455	2.55756				ENSMUSG00000038602	7	Slc35f1	protein_coding	ensembl_havana	chr10:52690533-53111622:+
50.9906	-1.21246	1.8156	-0.667804				ENSMUSG00000024542	8	Cep192	protein_coding	ensembl	chr18:67800107-67885168:+
50.9334	-0.010225	2.01543	-0.00507336	0.995952	0.937976	6.07075	ENSMUSG00000090634	1	Gm8126	protein_coding	havana	chr14:43258649-43266799:+
50.9141	-9.31823	2.59856	-3.58593				ENSMUSG00000090383	1	Vmn2r58	protein_coding	ensembl_havana	chr7:41836881-41872670:-
50.8716	-3.02352	2.13361	-1.4171				ENSMUSG00000003929	10	Zfp81	protein_coding	ensembl_havana	chr17:33329342-33358878:-
50.8578	-3.34717	1.09198	-3.06523	0.00217503	0.0266584	6.41147	ENSMUSG00000034312	14	Iqsec1	protein_coding	ensembl_havana	chr6:90656088-90988685:-
50.7912	3.57219	1.60969	2.21918				ENSMUSG00000029334	14	Prkg2	protein_coding	ensembl_havana	chr5:98929773-99037351:-
50.7681	-1.57549	1.38435	-1.13807	0.255092	0.43298	6.41147	ENSMUSG00000034480	18	Diaph2	protein_coding	ensembl_havana	chrX:129749742-130465834:+
50.6926	3.42201	1.85505	1.8447				ENSMUSG00000034607	6	Pof1b	protein_coding	ensembl_havana	chrX:112638431-112698651:-
50.6653	1.8722	1.50822	1.24133	0.214483	0.389906	6.51356	ENSMUSG00000005514	14	Por	protein_coding	ensembl_havana	chr5:135670033-135735326:+
50.6553	5.03741	2.35648	2.13769				ENSMUSG00000028217	11	Cdh17	protein_coding	ensembl_havana	chr4:11758147-11817895:+
50.6458	2.64034	2.7025	0.977				ENSMUSG00000037583	2	Nr0b2	protein_coding	ensembl_havana	chr4:133553376-133556536:+
50.5999	5.08183	1.9183	2.64914	0.00806977	0.0621697	6.07075	ENSMUSG00000000861	15	Bcl11a	protein_coding	ensembl_havana	chr11:24078056-24174123:+
50.547	-0.114008	2.07423	-0.0549641				ENSMUSG00000031099	16	Smarca1	protein_coding	ensembl_havana	chrX:47809368-47892974:-
50.5258	-9.10441	2.57917	-3.52998				ENSMUSG00000051732	2	Pabpc2	protein_coding	ensembl_havana	chr18:39773497-39776082:+
50.4615	1.8607	1.47556	1.26101				ENSMUSG00000040865	15	Ino80d	protein_coding	ensembl_havana	chr1:62958418-63114667:-
50.3306	0.336226	0.990732	0.339371	0.73433	0.787679	6.07075	ENSMUSG00000037692	14	Ahdc1	protein_coding	ensembl_havana	chr4:133011260-133078110:+
50.2626	3.68907	1.85784	1.98568				ENSMUSG00000038740	9	Mvb12b	protein_coding	ensembl_havana	chr2:33729953-33887946:-
50.1866	6.42065	2.72643	2.35497				ENSMUSG00000062553	3	Olfr709-ps1	protein_coding	ensembl_havana	chr7:106922874-106932219:-
50.1075	0.363147	1.5774	0.230218	0.817922	0.768741	7.14632	ENSMUSG00000073702	11	Rpl31	protein_coding	ensembl_havana	chr1:39367842-39371911:+
50.0773	7.75314	2.16857	3.57523				ENSMUSG00000009633	3	G0s2	protein_coding	ensembl_havana	chr1:193272161-193273217:-
50.0437	7.00798	2.23985	3.12877				ENSMUSG00000044645	7	Gm7334	protein_coding	ensembl	chr17:50698525-50699880:+
50.0239	0.321035	1.96964	0.162992	0.870525	0.833126	6.41147	ENSMUSG00000071068	6	Treml2	protein_coding	ensembl	chr17:48300038-48312534:+
50.0198	-1.55893	1.62866	-0.957188	0.338472	0.48074	7.14632	ENSMUSG00000062209	15	Erbb4	protein_coding	ensembl_havana	chr1:68032186-69108059:-
50.0156	0.404114	1.91074	0.211496	0.8325	0.838508	6.07075	ENSMUSG00000062006	12	Rpl34	protein_coding	ensembl_havana	chr3:130726831-130730398:-
49.9821	3.64252	1.55754	2.33864				ENSMUSG00000068923	14	Syt11	protein_coding	ensembl_havana	chr3:88744700-88775164:-
49.8547	4.78326	2.40362	1.99003				ENSMUSG00000001943	8	Vsig2	protein_coding	ensembl_havana	chr9:37539255-37544205:+
49.8358	0.756767	1.71921	0.440183				ENSMUSG00000030967	15	Zranb1	protein_coding	ensembl_havana	chr7:132931142-132986391:+
49.8239	-0.565978	2.12155	-0.266776				ENSMUSG00000021680	7	Crhbp	protein_coding	ensembl	chr13:95431371-95444831:-
49.668	6.73553	2.30313	2.92452				ENSMUSG00000029088	16	Kcnip4	protein_coding	ensembl_havana	chr5:48389502-49524907:-
49.6659	-5.97519	2.49875	-2.39127				ENSMUSG00000044071	7	Fam19a2	protein_coding	ensembl	chr10:123264076-123741204:+
49.6138	-0.843211	2.45213	-0.343869				ENSMUSG00000048701	13	Ccdc6	protein_coding	ensembl_havana	chr10:70097121-70193200:+
49.5821	-0.203699	1.88634	-0.107987				ENSMUSG00000022387	16	Brd1	protein_coding	ensembl_havana	chr15:88687300-88734233:-
49.5785	3.31168	1.35181	2.44981				ENSMUSG00000043929	16	Klhl15	protein_coding	ensembl_havana	chrX:94234599-94277724:+
49.5627	4.53717	1.94806	2.32907				ENSMUSG00000087444	1	Gm5475	protein_coding	havana	chr15:100422147-100428150:+
49.5495	0.666108	1.37354	0.484957	0.627707	0.732485	6.07075	ENSMUSG00000078817	4	Nlrp12	protein_coding	ensembl_havana	chr7:3218784-3249740:-
49.5313	-4.22704	1.44345	-2.92842				ENSMUSG00000040661	6	Rad54l2	protein_coding	ensembl_havana	chr9:106688082-106789194:-
49.509	3.76882	1.41102	2.671	0.00756262	0.0538457	7.14632	ENSMUSG00000042323	16	Pbrm1	protein_coding	ensembl_havana	chr14:31019138-31121592:+
49.4733	6.35332	2.23115	2.84755				ENSMUSG00000049988	4	Lrrc25	protein_coding	ensembl_havana	chr8:70616155-70620890:+
49.4703	5.03387	2.061	2.44245				ENSMUSG00000024835	14	Coro1b	protein_coding	ensembl_havana	chr19:4148619-4154035:+
49.4373	3.40724	1.58481	2.14993	0.0315607	0.128141	6.5981	ENSMUSG00000031812	16	Map1lc3b	protein_coding	ensembl_havana	chr8:121590361-121598760:+
49.2957	-2.16711	2.11139	-1.02639				ENSMUSG00000027589	14	Pcmtd2	protein_coding	ensembl_havana	chr2:181837854-181857461:+
49.2758	-0.0177035	1.6723	-0.0105863				ENSMUSG00000060131	11	Atp8b4	protein_coding	ensembl_havana	chr2:126320973-126500674:-
49.2514	-4.75486	1.44148	-3.2986				ENSMUSG00000075033	3	Nxpe3	protein_coding	ensembl	chr16:55839953-55895279:-
49.1843	1.17129	2.30082	0.509074	0.610701	0.724383	6.07075	ENSMUSG00000025326	12	Ube3a	protein_coding	ensembl_havana	chr7:59228750-59311536:+
49.1633	-2.76296	1.36378	-2.02596	0.0427692	0.154684	6.5981	ENSMUSG00000029723	16	Tsc22d4	protein_coding	ensembl_havana	chr5:137745730-137768450:+
49.151	-5.96303	1.92876	-3.09164	0.00199051	0.0247651	6.5981	ENSMUSG00000045409	16	Trim39	protein_coding	ensembl_havana	chr17:36258873-36272247:-
49.051	-2.39173	2.65844	-0.899673				ENSMUSG00000020248	18	Nfyb	protein_coding	ensembl_havana	chr10:82748701-82764144:-
49.0315	3.99136	1.65232	2.4156				ENSMUSG00000047810	8	Ccdc88b	protein_coding	ensembl	chr19:6844623-6858211:-
49.0251	-4.48655	1.95178	-2.29869				ENSMUSG00000046591	10	Ticrr	protein_coding	ensembl_havana	chr7:79660196-79698148:+
49.0215	0.711106	1.8885	0.376545				ENSMUSG00000064293	14	Cntn4	protein_coding	ensembl_havana	chr6:105677660-106699310:+
49.0102	-5.20923	1.61801	-3.21953	0.00128399	0.0194378	6.5981	ENSMUSG00000042282	4	Gucy2f	protein_coding	ensembl_havana	chrX:142081160-142196931:-
48.9732	5.86345	2.19554	2.67061				ENSMUSG00000073771	11	Btbd19	protein_coding	ensembl_havana	chr4:117119219-117125725:-
48.8748	4.01692	1.72229	2.33232				ENSMUSG00000041890	17	Git2	protein_coding	ensembl_havana	chr5:114727407-114775517:-
48.7896	-2.30922	1.54868	-1.49109	0.135939	0.300363	6.5981	ENSMUSG00000040713	12	Creg1	protein_coding	ensembl_havana	chr1:165763746-165775308:+
48.787	2.07063	1.99871	1.03598				ENSMUSG00000020817	16	Rabep1	protein_coding	ensembl_havana	chr11:70844778-70943105:+
48.7842	-4.16306	1.66776	-2.4962				ENSMUSG00000041720	12	Pi4ka	protein_coding	ensembl_havana	chr16:17280351-17406314:-
48.7728	4.80355	2.05592	2.33645				ENSMUSG00000035171	9	1110059E24Rik	protein_coding	ensembl_havana	chr19:21581202-21652976:-
48.7682	-4.34836	1.67661	-2.59354				ENSMUSG00000018974	7	Sart3	protein_coding	ensembl_havana	chr5:113742446-113772510:-
48.7608	-0.689472	1.09347	-0.630536	0.528344	0.655668	6.51356	ENSMUSG00000035299	16	Mid1	protein_coding	ensembl_havana	chrX:169685199-170005736:+
48.7492	-2.72635	1.85424	-1.47033	0.141471	0.311378	6.41147	ENSMUSG00000031729	6	Ist1	protein_coding	ensembl_havana	chr8:109671325-109693260:-
48.7294	5.3681	2.08552	2.57398				ENSMUSG00000056737	14	Capg	protein_coding	ensembl_havana	chr6:72544391-72562983:+
48.7201	-3.68941	1.5406	-2.39478				ENSMUSG00000028369	15	Svep1	protein_coding	ensembl_havana	chr4:58042442-58206859:-
48.7146	-3.06169	1.49348	-2.05004	0.0403609	0.157762	6.07075	ENSMUSG00000029471	13	Camkk2	protein_coding	ensembl_havana	chr5:122731170-122779409:-
48.6903	-3.77001	1.41874	-2.6573				ENSMUSG00000055932	15	Fto	protein_coding	ensembl_havana	chr8:91313525-91668439:+
48.6903	5.06726	1.95443	2.59271				ENSMUSG00000030866	8	Ern2	protein_coding	ensembl_havana	chr7:122169893-122186207:-
48.594	5.6236	1.83227	3.0692				ENSMUSG00000040189	17	Ccdc114	protein_coding	ensembl_havana	chr7:45924072-45948963:+
48.513	4.4721	1.80186	2.48194				ENSMUSG00000032187	16	Smarca4	protein_coding	ensembl_havana	chr9:21616169-21704230:+
48.5028	3.15007	1.50365	2.09496				ENSMUSG00000031543	18	Ank1	protein_coding	ensembl_havana	chr8:22974844-23150497:+
48.4651	-0.713169	1.5471	-0.460972	0.644819	0.724383	6.41147	ENSMUSG00000017677	11	Wsb1	protein_coding	ensembl_havana	chr11:79239372-79254671:-
48.4566	0.124511	1.38779	0.0897189	0.928511	0.814053	7.14632	ENSMUSG00000025314	16	Ptprj	protein_coding	ensembl_havana	chr2:90429754-90580647:-
48.305	5.86443	2.17339	2.69829				ENSMUSG00000033790	11	Tubgcp5	protein_coding	ensembl_havana	chr7:55794154-55831677:+
48.2771	5.51733	2.3475	2.3503				ENSMUSG00000036658	4	Olfr11	protein_coding	ensembl_havana	chr13:21636623-21642518:-
48.1068	-3.64941	2.2567	-1.61714	0.105847	0.260852	6.5981	ENSMUSG00000072704	6	Smim10l1	protein_coding	ensembl_havana	chr6:133104909-133110899:+
48.0694	4.52015	1.92076	2.35331				ENSMUSG00000045038	14	Prkce	protein_coding	ensembl_havana	chr17:86167785-86657919:+
48.0546	-4.58704	1.8327	-2.50289				ENSMUSG00000026554	15	Dcaf8	protein_coding	ensembl_havana	chr1:172148084-172197005:+
48.0526	-7.08071	2.27759	-3.10886				ENSMUSG00000060913	6	Trim55	protein_coding	ensembl_havana	chr3:19644474-19692421:+
48.0503	-0.564573	1.32139	-0.427256	0.669193	0.731896	6.51356	ENSMUSG00000021313	15	Ryr2	protein_coding	ensembl	chr13:11553103-12106945:-
48.0464	-4.67026	1.99739	-2.33819				ENSMUSG00000042557	14	Sin3a	protein_coding	ensembl_havana	chr9:57072040-57128366:+
48.0427	3.37725	1.56487	2.15816				ENSMUSG00000072707	3	Olfr31	protein_coding	ensembl_havana	chr14:14322828-14331791:+
47.9918	-0.965332	1.96122	-0.492211				ENSMUSG00000091896	7	Ube2d2a	protein_coding	ensembl	chr18:35771559-35807172:+
47.9794	4.49043	1.82817	2.45625				ENSMUSG00000033808	16	Tmem87a	protein_coding	ensembl_havana	chr2:120355312-120404113:-
47.9641	0.054698	1.54978	0.035294	0.971845	0.868717	6.5981	ENSMUSG00000066800	11	Rnasel	protein_coding	ensembl_havana	chr1:153749426-153764221:+
47.959	3.9321	1.64729	2.38701				ENSMUSG00000029840	8	Mtpn	protein_coding	ensembl_havana	chr6:35508906-35539888:-
47.9395	1.05462	1.10924	0.95076	0.341726	0.484165	7.14632	ENSMUSG00000075046	7	Duxf3	protein_coding	ensembl_havana	chr10:58229979-58232675:-
47.8762	-1.06803	1.76904	-0.603732				ENSMUSG00000055322	15	Tns1	protein_coding	ensembl_havana	chr1:73910231-74124449:-
47.8749	-0.293619	2.5014	-0.117382				ENSMUSG00000020163	12	Uqcr11	protein_coding	ensembl_havana	chr10:80402997-80406830:-
47.8667	1.00467	1.34503	0.746947	0.455095	0.603488	6.51356	ENSMUSG00000007656	13	Arpp19	protein_coding	ensembl_havana	chr9:75037614-75060313:+
47.8539	-6.99574	2.46551	-2.83744				ENSMUSG00000075172	2	Olfr1090	protein_coding	ensembl_havana	chr2:86752724-86758993:-
47.771	2.95309	1.50482	1.96243				ENSMUSG00000003847	16	Nfat5	protein_coding	ensembl_havana	chr8:107293470-107379517:+
47.7694	5.45984	2.25005	2.42654				ENSMUSG00000054321	6	Taf4b	protein_coding	ensembl	chr18:14783245-14900359:+
47.7676	4.96242	1.91873	2.58631				ENSMUSG00000021597	16	Slf1	protein_coding	ensembl_havana	chr13:77043088-77135473:-
47.7525	-1.38215	1.26801	-1.09001	0.275707	0.470091	6.07075	ENSMUSG00000034160	13	Ogt	protein_coding	ensembl_havana	chrX:101640060-101684351:+
47.7519	-1.96529	1.22318	-1.60671	0.108119	0.253196	7.14632	ENSMUSG00000026288	14	Inpp5d	protein_coding	ensembl_havana	chr1:87620312-87720507:+
47.7228	-7.14753	2.29717	-3.11145				ENSMUSG00000021911	15	Parg	protein_coding	ensembl_havana	chr14:32201949-32297550:+
47.6949	3.62251	1.44861	2.50068				ENSMUSG00000034848	17	Ttc21b	protein_coding	ensembl_havana	chr2:66184327-66256617:-
47.6736	6.30173	2.35579	2.67499				ENSMUSG00000042712	10	Wbp5	protein_coding	ensembl_havana	chrX:136245079-136247139:+
47.6649	-2.97519	1.98745	-1.49698				ENSMUSG00000027245	11	Hypk	protein_coding	ensembl_havana	chr2:121453290-121458672:+
47.6126	-3.53854	1.49124	-2.37288	0.01765	0.0909106	6.51356	ENSMUSG00000028771	13	Ptpn12	protein_coding	ensembl_havana	chr5:20986645-21055911:-
47.6055	-2.5651	2.14894	-1.19366				ENSMUSG00000005034	15	Prkacb	protein_coding	ensembl_havana	chr3:146729574-146812990:-
47.5995	-0.771647	1.5061	-0.512349	0.608407	0.673001	7.14632	ENSMUSG00000028619	15	Tceanc2	protein_coding	ensembl_havana	chr4:107134155-107179116:-
47.5949	3.79818	1.59206	2.38569				ENSMUSG00000019802	13	Sec63	protein_coding	ensembl_havana	chr10:42761496-42832514:+
47.5922	0.999418	1.29519	0.771637	0.440329	0.587433	6.5981	ENSMUSG00000024589	15	Nedd4l	protein_coding	ensembl	chr18:64887756-65217826:+
47.5467	-3.76212	1.46197	-2.57332	0.0100729	0.0663941	6.51356	ENSMUSG00000035401	9	Emsy	protein_coding	ensembl_havana	chr7:98587137-98656783:-
47.5225	6.4509	2.22645	2.89739				ENSMUSG00000035125	10	Gcfc2	protein_coding	ensembl_havana	chr6:81923669-81959915:+
47.5138	-1.51087	1.61671	-0.93453	0.350031	0.517332	6.5981	ENSMUSG00000078153	3	Psme2b	protein_coding	havana	chr11:48945354-48946190:-
47.5097	-5.06823	1.63875	-3.09275				ENSMUSG00000028312	19	Smc2	protein_coding	ensembl_havana	chr4:52439243-52488260:+
47.4816	-5.50733	1.79161	-3.07395				ENSMUSG00000033845	13	Mrpl15	protein_coding	ensembl_havana	chr1:4773206-4785739:-
47.4369	8.98515	2.30033	3.90603				ENSMUSG00000061039	4	Olfr920	protein_coding	ensembl_havana	chr9:38752299-38756739:+
47.4155	0.583695	2.01884	0.289124	0.772487	0.807363	6.07075	ENSMUSG00000045665	4	Mfsd5	protein_coding	ensembl	chr15:102279456-102281744:+
47.3878	-6.38577	2.02549	-3.15271				ENSMUSG00000063354	6	Slc39a4	protein_coding	ensembl	chr15:76612385-76616852:-
47.3761	-0.530734	1.41636	-0.374717	0.707871	0.745207	6.5981	ENSMUSG00000020440	13	Arf5	protein_coding	ensembl_havana	chr6:28423560-28426602:+
47.3485	3.09307	1.71043	1.80837				ENSMUSG00000038014	7	Fam120a	protein_coding	ensembl	chr13:48879219-48968017:-
47.26	7.27081	2.73945	2.65412				ENSMUSG00000073927	5	Olfr652	protein_coding	ensembl_havana	chr7:104560901-104568634:+
47.2502	4.80558	1.82341	2.63549				ENSMUSG00000027498	14	Cstf1	protein_coding	ensembl_havana	chr2:172370681-172382448:+
47.2332	-0.169393	1.85469	-0.0913325				ENSMUSG00000003812	13	Dnase2a	protein_coding	ensembl_havana	chr8:84908560-84922915:+
47.2013	4.60234	1.91187	2.40725				ENSMUSG00000029550	11	Sppl3	protein_coding	ensembl_havana	chr5:115011137-115098790:+
47.1908	7.49615	2.47768	3.02547				ENSMUSG00000078427	2	Sarnp	protein_coding	ensembl	chr10:128821771-128877638:+
47.1844	-7.01358	2.28349	-3.07144				ENSMUSG00000029776	11	Hibadh	protein_coding	ensembl_havana	chr6:52546228-52640389:-
47.134	-0.348888	1.67293	-0.208549	0.8348	0.804582	6.5981	ENSMUSG00000029826	14	Zc3hav1	protein_coding	ensembl_havana	chr6:38305286-38354603:-
47.0208	0.909367	1.3483	0.674455	0.500022	0.635583	6.51356	ENSMUSG00000042625	16	Safb2	protein_coding	ensembl_havana	chr17:56560965-56584585:-
46.9821	3.74819	1.82201	2.05718				ENSMUSG00000020315	18	Sptbn1	protein_coding	ensembl_havana	chr11:30099395-30268175:-
46.9585	-0.833092	1.8424	-0.452177				ENSMUSG00000020982	8	Nemf	protein_coding	ensembl	chr12:69311544-69357176:-
46.9369	-5.02442	1.58868	-3.16263	0.00156351	0.0220954	6.07075	ENSMUSG00000031608	13	Galnt7	protein_coding	ensembl_havana	chr8:57523828-57653032:-
46.9262	2.82169	1.85367	1.52222				ENSMUSG00000025104	13	Hdgfrp3	protein_coding	ensembl_havana	chr7:81881251-81934473:-
46.9037	4.06315	1.62204	2.50496	0.0122464	0.0737356	6.5981	ENSMUSG00000025059	16	Gk	protein_coding	ensembl_havana	chrX:85701937-85776819:-
46.8558	-1.9224	1.92483	-0.998736				ENSMUSG00000060275	11	Nrg2	protein_coding	ensembl_havana	chr18:36017707-36197380:-
46.8524	7.21559	2.05634	3.50894				ENSMUSG00000024677	13	Ms4a6b	protein_coding	ensembl_havana	chr19:11516512-11531256:+
46.815	7.38155	2.34428	3.14875	0.00163968	0.0219946	6.5981	ENSMUSG00000041681	2	Iapp	protein_coding	ensembl_havana	chr6:142298423-142303961:+
46.8033	1.81574	1.95227	0.930068				ENSMUSG00000027333	18	Smox	protein_coding	ensembl_havana	chr2:131491496-131525922:+
46.7555	-3.47386	1.20728	-2.87743	0.00400933	0.0386244	6.5981	ENSMUSG00000022957	19	Itsn1	protein_coding	ensembl_havana	chr16:91729281-91920597:+
46.736	1.02232	1.17509	0.869991	0.384305	0.547854	6.51356	ENSMUSG00000022636	13	Alcam	protein_coding	ensembl_havana	chr16:52248996-52454074:-
46.6271	-2.1205	1.11744	-1.89763	0.0577445	0.183412	6.5981	ENSMUSG00000070576	4	Mn1	protein_coding	ensembl_havana	chr5:111417362-111457033:+
46.6148	2.62602	2.42093	1.08471				ENSMUSG00000074028	4	Slc22a13	protein_coding	ensembl_havana	chr9:119192974-119209098:-
46.5855	2.52774	2.0465	1.23515				ENSMUSG00000020307	14	Cdc34	protein_coding	ensembl	chr10:79682195-79688394:+
46.5218	1.92678	1.93417	0.99618				ENSMUSG00000009555	16	Cdk9	protein_coding	ensembl_havana	chr2:32705784-32713076:-
46.502	2.86116	1.49939	1.90821				ENSMUSG00000026775	9	Yme1l1	protein_coding	ensembl_havana	chr2:23156369-23199260:+
46.4651	-6.99936	2.05897	-3.39946				ENSMUSG00000020492	11	Ska2	protein_coding	ensembl_havana	chr11:87109234-87124635:+
46.4593	0.618695	2.0368	0.303758	0.761312	0.801686	6.07075	ENSMUSG00000026433	13	Rab29	protein_coding	ensembl_havana	chr1:131867224-131872887:+
46.4259	4.55041	1.78372	2.55107	0.0107393	0.0695056	6.41147	ENSMUSG00000052471	2	Gm9881	protein_coding	ensembl	chr16:91168197-91171401:-
46.4147	-6.26222	1.92463	-3.25373				ENSMUSG00000016528	10	Mapkapk2	protein_coding	ensembl_havana	chr1:131053700-131097826:-
46.4027	5.76827	1.97018	2.92779				ENSMUSG00000024013	14	Fgd2	protein_coding	ensembl_havana	chr17:29360914-29379660:+
46.396	0.725241	2.101	0.345188				ENSMUSG00000039737	11	Prkrip1	protein_coding	ensembl_havana	chr5:136178127-136198963:-
46.3904	-5.94382	1.55258	-3.82834				ENSMUSG00000027364	12	Usp50	protein_coding	ensembl_havana	chr2:126709096-126783458:-
46.3372	-1.04357	2.03426	-0.512996				ENSMUSG00000027823	9	Gmps	protein_coding	ensembl_havana	chr3:63976106-64022579:+
46.3367	6.10208	1.96053	3.11246				ENSMUSG00000019818	15	Cd164	protein_coding	ensembl_havana	chr10:41519414-41531048:+
46.3366	-7.10717	2.27927	-3.11818				ENSMUSG00000055720	10	Ubl7	protein_coding	ensembl_havana	chr9:57910979-57929968:+
46.3206	3.78549	1.59672	2.37079				ENSMUSG00000039620	17	6430573F11Rik	protein_coding	ensembl_havana	chr8:36457548-36516570:+
46.214	4.42	1.56883	2.81739				ENSMUSG00000071856	10	Mcc	protein_coding	ensembl_havana	chr18:44425060-44812182:-
46.2055	-5.0085	1.56403	-3.2023				ENSMUSG00000028756	12	Pink1	protein_coding	ensembl_havana	chr4:138313409-138326307:-
46.1947	-5.36015	1.5308	-3.50154	0.000462573	0.0113997	6.5981	ENSMUSG00000033577	18	Myo6	protein_coding	ensembl_havana	chr9:80165031-80311729:+
46.1669	1.03404	2.37258	0.435829				ENSMUSG00000020659	15	Cbll1	protein_coding	ensembl_havana	chr12:31484829-31499616:-
46.1285	-5.44495	1.68822	-3.22526	0.00125858	0.0201186	6.07075	ENSMUSG00000004730	14	Adgre1	protein_coding	ensembl	chr17:57358686-57483529:+
46.0231	-3.19014	1.56768	-2.03494	0.0418567	0.152163	6.5981	ENSMUSG00000052331	14	Ankrd44	protein_coding	ensembl_havana	chr1:54645340-54926387:-
45.9596	3.16491	1.74647	1.81218				ENSMUSG00000032582	14	Rbm6	protein_coding	ensembl_havana	chr9:107773559-107873237:-
45.9304	0.257704	2.10585	0.122375	0.902602	0.847743	6.41147	ENSMUSG00000064368	1	mt-Nd6	protein_coding	insdc	chrM:13552-14070:-
45.9213	-4.34814	1.77032	-2.45614				ENSMUSG00000060534	15	Dcc	protein_coding	ensembl_havana	chr18:71258738-72351069:-
45.875	1.67081	1.90066	0.879068	0.379364	0.540339	6.5981	ENSMUSG00000058897	17	Col25a1	protein_coding	ensembl_havana	chr3:130131501-130599877:+
45.8654	5.20256	1.7369	2.9953				ENSMUSG00000045917	17	Tmem268	protein_coding	ensembl_havana	chr4:63558781-63586357:+
45.8648	1.86769	1.55819	1.19863				ENSMUSG00000070733	13	Fryl	protein_coding	ensembl_havana	chr5:73019987-73256619:-
45.8519	5.70172	2.3665	2.40935	0.015981	0.0864034	6.5981	ENSMUSG00000042256	4	Ptchd4	protein_coding	ensembl	chr17:42315947-42507741:+
45.8169	5.7122	2.22142	2.57142				ENSMUSG00000032086	12	Bace1	protein_coding	ensembl_havana	chr9:45838580-45864399:+
45.8084	4.96456	1.93666	2.56347	0.0103632	0.066963	6.5981	ENSMUSG00000001627	11	Ifrd1	protein_coding	ensembl_havana	chr12:40201567-40248504:-
45.806	-1.88481	1.65075	-1.14178				ENSMUSG00000049354	8	Dcaf7	protein_coding	ensembl_havana	chr11:106036872-106059324:+
45.7973	4.59192	2.00842	2.28634				ENSMUSG00000021240	5	Abcd4	protein_coding	ensembl	chr12:84602531-84617466:-
45.7236	0.104755	1.72643	0.0606773				ENSMUSG00000008575	17	Nfib	protein_coding	ensembl_havana	chr4:82290173-82705750:-
45.7064	-5.31964	1.87871	-2.83154				ENSMUSG00000048826	6	Dact2	protein_coding	ensembl	chr17:14195231-14203831:-
45.66	3.77131	1.46594	2.57263				ENSMUSG00000019254	16	Ppp1r12c	protein_coding	ensembl_havana	chr7:4481520-4501680:-
45.5029	4.66064	1.66784	2.79442				ENSMUSG00000025393	12	Atp5b	protein_coding	ensembl_havana	chr10:128083273-128090391:+
45.4835	5.26001	2.0136	2.61223				ENSMUSG00000031558	15	Slit2	protein_coding	ensembl_havana	chr5:47983138-48307733:+
45.4338	-1.30174	1.83914	-0.707798	0.479071	0.614907	6.5981	ENSMUSG00000024146	9	Cript	protein_coding	ensembl_havana	chr17:87025550-87035810:+
45.3863	-3.52033	1.62875	-2.16136				ENSMUSG00000027598	16	Itch	protein_coding	ensembl_havana	chr2:155133509-155226855:+
45.3658	-4.23046	2.27143	-1.86246				ENSMUSG00000096446	1	Gm8104	protein_coding	havana	chr14:43100601-43115190:+
45.2637	2.75381	1.73448	1.58768				ENSMUSG00000052727	5	Map1b	protein_coding	ensembl	chr13:99421464-99516602:-
45.2109	5.91691	2.16685	2.73065				ENSMUSG00000022039	5	Adam2	protein_coding	ensembl	chr14:66027329-66077733:-
45.2098	-1.39593	1.50712	-0.926223	0.35433	0.54341	6.07075	ENSMUSG00000036452	17	Arhgap26	protein_coding	ensembl_havana	chr18:38601534-39376284:+
45.1361	8.00643	2.25656	3.54806				ENSMUSG00000058755	3	Osm	protein_coding	ensembl_havana	chr11:4236420-4241026:+
45.1254	5.61762	1.9078	2.94456				ENSMUSG00000024817	13	Uhrf2	protein_coding	ensembl_havana	chr19:30030513-30093722:+
45.1111	-0.191121	1.73087	-0.110419				ENSMUSG00000030720	16	Cln3	protein_coding	ensembl_havana	chr7:126571207-126585817:-
45.1077	3.29417	1.40595	2.34303	0.0191279	0.0978975	6.07075	ENSMUSG00000002748	7	Baz1b	protein_coding	ensembl_havana	chr5:135187264-135246129:+
45.0972	-0.171393	1.44283	-0.11879	0.905442	0.805354	7.14632	ENSMUSG00000033192	5	Lpcat2	protein_coding	ensembl_havana	chr8:92855339-92919279:+
45.0916	5.00041	1.7841	2.80276	0.0050668	0.0449312	6.5981	ENSMUSG00000002227	15	Mov10	protein_coding	ensembl_havana	chr3:104794836-104818563:-
45.0507	0.263302	1.88041	0.140023				ENSMUSG00000021591	7	Glrx	protein_coding	ensembl_havana	chr13:75839868-75850151:+
[truncated: 15,710 more rows]
