# Supplementary material for: A neutrophil–B-cell axis impacts tissue damage control in a mouse model of intraabdominal bacterial infection via Cxcr4
Source: eLife. 2022 Sep 30;11:e78291. doi: 10.7554/eLife.78291 (PMC9525059; doi:10.7554/eLife.78291)
Supplement: Supplementary file 2. [file elife-78291-supp2.xlsx]

## Sheet: Tabelle1
baseMean	log2FoldChange	lfcSE	stat	pvalue	padj	weight	gene_id	gene_version	gene_name	gene_biotype	gene_source	location
1.09113e+06	-2.61483	1.54939	-1.68766	0.0914773	0.298023	4.5	ENSMUSG00000075014	1	Gm10800	protein_coding	ensembl	chr2:98666547-98667301:-
305299	-2.6154	1.54664	-1.69102	0.0908323	0.267003	5.72755	ENSMUSG00000075015	3	Gm10801	protein_coding	ensembl	chr2:98662237-98664083:+
73352	-0.339423	1.47741	-0.229742	0.818293	0.908832	4.5	ENSMUSG00000056054	9	S100a8	protein_coding	ensembl_havana	chr3:90668978-90670035:+
72295.6	1.46936	1.40115	1.04868	0.294323	0.486131	5.72755	ENSMUSG00000056071	12	S100a9	protein_coding	ensembl_havana	chr3:90692632-90695721:-
60594.4	-2.58181	1.50566	-1.71473	0.0863938	0.271354	5.25398	ENSMUSG00000095280	1	Gm21738	protein_coding	ensembl	chr14:19415857-19418930:-
54844	-2.52326	1.49863	-1.68371	0.0922379	0.299073	4.5	ENSMUSG00000095891	7	Gm10717	protein_coding	ensembl	chr9:3025417-3033289:+
26916.7	-2.57293	1.49864	-1.71684	0.086009	0.264535	5.72755	ENSMUSG00000095547	1	Gm10719	protein_coding	ensembl	chr9:3017408-3021593:+
23149.1	2.00063	1.42333	1.4056	0.159844	0.373922	5.25398	ENSMUSG00000038357	10	Camp	protein_coding	ensembl_havana	chr9:109847379-109849617:-
22947.3	-2.56903	1.51136	-1.69982	0.0891654	0.266498	5.72755	ENSMUSG00000091028	1	Gm10722	protein_coding	ensembl	chr9:3000922-3002330:+
20237.4	1.14912	1.39483	0.823846	0.410027	0.648668	4.5	ENSMUSG00000032484	8	Ngp	protein_coding	ensembl_havana	chr9:110419747-110423012:+
18759.1	-2.66148	1.51749	-1.75387	0.0794522	0.265817	5.25398	ENSMUSG00000095186	1	Gm10718	protein_coding	ensembl	chr9:3023547-3025218:+
12907.1	0.608683	1.39199	0.437274	0.661912	0.82719	4.5	ENSMUSG00000029580	14	Actb	protein_coding	ensembl_havana	chr5:142903115-142906754:-
9154.37	1.15258	1.51768	0.759438	0.447591	0.603149	5.72755	ENSMUSG00000022651	5	Retnlg	protein_coding	ensembl	chr16:48872608-48874498:+
8571.16	0.970257	1.40766	0.689272	0.490652	0.631185	5.72755	ENSMUSG00000032496	7	Ltf	protein_coding	ensembl_havana	chr9:111019271-111042767:+
6859.73	1.44368	1.44915	0.996229	0.319139	0.574494	4.5	ENSMUSG00000026822	14	Lcn2	protein_coding	ensembl_havana	chr2:32384633-32388252:-
6467.77	-2.5809	1.52211	-1.69561	0.089959	0.267003	5.72755	ENSMUSG00000074564	3	Gm10720	protein_coding	ensembl	chr9:3015654-3017210:+
5887.57	1.06722	1.4516	0.735199				ENSMUSG00000049775	16	Tmsb4x	protein_coding	ensembl_havana	chrX:167207093-167209315:-
4702.61	1.17547	1.42796	0.823179	0.410406	0.648668	4.5	ENSMUSG00000051748	2	Wfdc21	protein_coding	ensembl_havana	chr11:83746940-83752642:+
4654.54	0.922648	1.39924	0.65939	0.509645	0.730862	4.5	ENSMUSG00000001025	8	S100a6	protein_coding	ensembl_havana	chr3:90612882-90624181:+
4134.57	-2.44716	1.46684	-1.66832	0.0952523	0.28232	5.25398	ENSMUSG00000096385	7	Gm11168	protein_coding	ensembl	chr9:3003346-3006948:+
3565.65	-2.49704	1.49832	-1.66657	0.0956007	0.305811	4.5	ENSMUSG00000096201	1	Gm10715	protein_coding	ensembl	chr9:3036877-3038316:+
3431.02	0.700894	1.47559	0.474993	0.634792	0.74929	5.25398	ENSMUSG00000005800	3	Mmp8	protein_coding	ensembl_havana	chr9:7558456-7568485:+
3285.15	-3.1986	1.52494	-2.09752				ENSMUSG00000035202	8	Lars2	protein_coding	ensembl_havana	chr9:123366927-123462666:+
3260.74	1.16898	1.40868	0.829839	0.40663	0.574494	5.72755	ENSMUSG00000030220	13	Arhgdib	protein_coding	ensembl_havana	chr6:136923655-136941899:-
2927.31	-2.54346	1.69001	-1.505				ENSMUSG00000008348	9	Ubc	protein_coding	ensembl_havana	chr5:125385965-125390202:-
2186.48	1.79863	1.43656	1.25205	0.210553	0.463808	4.5	ENSMUSG00000000682	7	Cd52	protein_coding	ensembl_havana	chr4:134082448-134095082:-
2184.15	1.86064	1.38968	1.3389	0.180604	0.431986	4.5	ENSMUSG00000015340	10	Cybb	protein_coding	ensembl_havana	chrX:9435252-9487771:-
2133.23	1.61481	1.44914	1.11432	0.265143	0.527371	4.5	ENSMUSG00000021998	16	Lcp1	protein_coding	ensembl_havana	chr14:75131101-75230842:+
2095.06	1.74926	1.3558	1.2902	0.196981	0.449151	4.5	ENSMUSG00000006333	14	Rps9	protein_coding	ensembl_havana	chr7:3703993-3706897:+
2014.78	2.01129	1.39489	1.44189	0.149333	0.389767	4.5	ENSMUSG00000030707	15	Coro1a	protein_coding	ensembl_havana	chr7:126699773-126707787:-
1904.24	1.36477	1.41122	0.967089	0.333499	0.584782	4.5	ENSMUSG00000040809	10	Chil3	protein_coding	ensembl_havana	chr3:106147554-106167564:-
1719.14	-8.95806	2.37291	-3.77514				ENSMUSG00000021054	5	Sgpp1	protein_coding	ensembl	chr12:75714248-75735729:-
1678.83	2.58348	1.47626	1.75001	0.0801159	0.280578	4.5	ENSMUSG00000047139	9	Cd24a	protein_coding	ensembl_havana	chr10:43578284-43584265:+
1671.27	3.17967	1.41309	2.25016	0.0244389	0.177235	4.5	ENSMUSG00000063856	7	Gpx1	protein_coding	ensembl_havana	chr9:108338903-108340343:+
1640.31	-14.0058	2.71305	-5.1624				ENSMUSG00000027832	5	Ptx3	protein_coding	ensembl_havana	chr3:66219910-66225805:+
1615.92	1.15098	1.45773	0.789573	0.429777	0.663831	4.5	ENSMUSG00000069516	7	Lyz2	protein_coding	ensembl	chr10:117277334-117282274:-
1464.69	1.06565	1.49117	0.714638	0.474833	0.703041	4.5	ENSMUSG00000036478	7	Btg1	protein_coding	ensembl	chr10:96617001-96622813:+
1445.04	-5.08034	1.93195	-2.62964				ENSMUSG00000047412	16	Zbtb44	protein_coding	ensembl_havana	chr9:31030644-31075885:+
1430.12	-2.56941	1.49248	-1.72157	0.0851471	0.264535	5.72755	ENSMUSG00000096736	1	Gm17535	protein_coding	ensembl	chr9:3034599-3035805:+
1379.85	0.833851	1.44054	0.578845	0.562694	0.764485	4.5	ENSMUSG00000062825	15	Actg1	protein_coding	ensembl_havana	chr11:120345690-120348542:-
1373.33	-2.5479	1.47049	-1.73268	0.0831525	0.267003	5.25398	ENSMUSG00000096519	1	Gm10721	protein_coding	ensembl	chr9:3013140-3014344:+
1362.86	1.57775	1.75466	0.899177	0.368558	0.571014	5.25398	ENSMUSG00000032501	8	Trib1	protein_coding	ensembl_havana	chr15:59648350-59656550:+
1355.57	1.91246	1.44525	1.32328	0.185743	0.401376	5.25398	ENSMUSG00000017737	2	Mmp9	protein_coding	ensembl_havana	chr2:164940780-164955850:+
1347.91	-11.1927	2.68027	-4.17594				ENSMUSG00000026866	16	Kynu	protein_coding	ensembl_havana	chr2:43555329-43682715:+
1269.75	2.04475	1.52176	1.34368	0.179052	0.379076	5.72755	ENSMUSG00000024164	15	C3	protein_coding	ensembl_havana	chr17:57203970-57228136:-
1218.71	-7.72674	3.16915	-2.43811				ENSMUSG00000042869	2	Olfr1370	protein_coding	ensembl_havana	chr13:21069334-21074947:-
1187.9	1.53238	1.45821	1.05086	0.293322	0.486131	5.72755	ENSMUSG00000006519	11	Cyba	protein_coding	ensembl_havana	chr8:122424776-122432930:-
1177.31	1.7468	1.41478	1.23468	0.21695	0.438243	5.25398	ENSMUSG00000020101	14	Vsir	protein_coding	ensembl_havana	chr10:60346851-60372684:+
1175.17	3.2468	1.5943	2.0365	0.0417	0.2175	4.5	ENSMUSG00000055148	7	Klf2	protein_coding	ensembl_havana	chr8:72319033-72321656:+
1146.19	2.34301	1.47535	1.5881	0.112264	0.290937	5.72755	ENSMUSG00000075705	12	Msrb1	protein_coding	ensembl_havana	chr17:24736642-24742778:+
1119.22	1.69252	1.42469	1.18799	0.234837	0.454085	5.25398	ENSMUSG00000018819	10	Lsp1	protein_coding	ensembl_havana	chr7:142460809-142494867:+
1078.5	-0.106645	1.95417	-0.0545732	0.956479	0.908867	5.25398	ENSMUSG00000035781	13	R3hdm4	protein_coding	ensembl	chr10:79910053-79917006:-
1074.59	-0.868866	1.67023	-0.520207	0.60292	0.793239	4.5	ENSMUSG00000042541	10	Shfm1	protein_coding	ensembl_havana	chr6:6557294-6578663:-
1074.25	-2.64194	1.62989	-1.62093				ENSMUSG00000029713	15	Gnb2	protein_coding	ensembl_havana	chr5:137528127-137533510:-
993.7	-1.64292	1.43217	-1.14715	0.251319	0.512675	4.5	ENSMUSG00000059772	12	Slx1b	protein_coding	ensembl_havana	chr7:126689468-126695784:-
976.449	1.02982	1.51292	0.680683	0.496072	0.720506	4.5	ENSMUSG00000030413	7	Pglyrp1	protein_coding	ensembl_havana	chr7:18871331-18890459:+
947.905	1.69344	1.36603	1.23968	0.215095	0.468612	4.5	ENSMUSG00000008475	13	Arpc5	protein_coding	ensembl_havana	chr1:152766542-152775597:+
901.502	3.34795	1.6346	2.04817	0.0405431	0.196146	5.72755	ENSMUSG00000071715	11	Ncf4	protein_coding	ensembl_havana	chr15:78244801-78262580:+
882.524	2.53972	1.33543	1.90179	0.0571982	0.231325	5.25398	ENSMUSG00000060791	15	Gmfg	protein_coding	ensembl_havana	chr7:28437447-28448233:+
876.151	1.05537	1.49714	0.704922	0.480859	0.62438	5.72755	ENSMUSG00000019505	7	Ubb	protein_coding	ensembl_havana	chr11:62551171-62553213:+
824.946	3.25276	1.44884	2.24509	0.0247625	0.177956	4.5	ENSMUSG00000019726	10	Lyst	protein_coding	ensembl	chr13:13590409-13777440:+
824.009	-1.7372	1.95145	-0.89021	0.373353	0.574516	5.25398	ENSMUSG00000016541	9	Atxn10	protein_coding	ensembl	chr15:85336381-85463836:+
800.61	0.368205	1.49556	0.246198	0.805529	0.901198	4.5	ENSMUSG00000038274	11	Fau	protein_coding	ensembl	chr19:6057888-6059524:+
792.254	-0.587162	1.53602	-0.382262	0.702267	0.844647	4.5	ENSMUSG00000072501	4	Phf20l1	protein_coding	ensembl	chr15:66577572-66645255:+
786.863	1.45294	1.51348	0.959996	0.337057	0.589237	4.5	ENSMUSG00000046841	5	Ckap4	protein_coding	ensembl_havana	chr10:84526305-84534062:-
779.703	2.50191	1.45429	1.72036	0.0853663	0.264535	5.72755	ENSMUSG00000021069	16	Pygl	protein_coding	ensembl_havana	chr12:70190811-70231488:-
777.643	1.82545	1.64334	1.11082	0.266646	0.529367	4.5	ENSMUSG00000001175	13	Calm1	protein_coding	ensembl_havana	chr12:100199435-100209806:+
767.581	0.157857	1.6296	0.0968684	0.922831	0.968391	4.5	ENSMUSG00000022205	15	Sub1	protein_coding	ensembl_havana	chr15:11981339-11996983:-
759.374	0.706842	1.65	0.428389	0.668368	0.82719	4.5	ENSMUSG00000030579	10	Tyrobp	protein_coding	ensembl_havana	chr7:30413760-30417585:+
739.714	0.413488	1.53767	0.268906	0.788002	0.82955	5.25398	ENSMUSG00000045587	9	BC049730	protein_coding	ensembl_havana	chr7:24709242-24714535:+
729.174	-0.647404	1.60339	-0.403771	0.686381	0.78395	5.25398	ENSMUSG00000031722	10	Hp	protein_coding	ensembl_havana	chr8:109575128-109579172:-
724.898	1.0811	1.65965	0.651402				ENSMUSG00000038612	16	Mcl1	protein_coding	ensembl_havana	chr3:95658788-95663176:+
714.465	4.39455	1.64265	2.67528	0.00746675	0.101793	4.5	ENSMUSG00000035356	16	Nfkbiz	protein_coding	ensembl_havana	chr16:55811375-55838899:-
702.203	1.02135	1.4034	0.727774	0.466752	0.69584	4.5	ENSMUSG00000025503	5	Taldo1	protein_coding	ensembl_havana	chr7:141392199-141402968:+
698.675	0.327832	1.69889	0.192969	0.846984	0.82719	5.72755	ENSMUSG00000015950	13	Ncf1	protein_coding	ensembl_havana	chr5:134220053-134229625:-
698.206	-1.28636	1.98257	-0.648835	0.516445	0.734049	4.5	ENSMUSG00000003283	14	Hck	protein_coding	ensembl_havana	chr2:153108468-153151441:+
693.093	-2.94519	1.78579	-1.64924				ENSMUSG00000025473	16	Adam8	protein_coding	ensembl_havana	chr7:139978932-139992562:-
680.825	-9.5634	2.80277	-3.41212				ENSMUSG00000024601	8	Isoc1	protein_coding	ensembl	chr18:58659482-58679570:+
679.618	0.364694	1.41106	0.258454	0.796057	0.831473	5.25398	ENSMUSG00000096054	3	Syne1	protein_coding	ensembl_havana	chr10:5020917-5551482:-
668.24	5.38915	1.74124	3.09501				ENSMUSG00000034342	9	Cbl	protein_coding	ensembl_havana	chr9:44142976-44234049:-
656.672	-7.62846	2.087	-3.65522				ENSMUSG00000038156	16	Spon1	protein_coding	ensembl_havana	chr7:113765998-114043370:+
651.909	0.99244	1.38542	0.716346	0.473778	0.702974	4.5	ENSMUSG00000023048	13	Prr13	protein_coding	ensembl_havana	chr15:102459028-102462806:+
649.736	0.0320357	1.63023	0.0196511	0.984322	1	4.5	ENSMUSG00000059108	4	Ifitm6	protein_coding	ensembl_havana	chr7:141015699-141017924:-
643.016	2.2203	1.66939	1.33	0.183518	0.435408	4.5	ENSMUSG00000018567	14	Gabarap	protein_coding	ensembl_havana	chr11:69991143-69994951:+
629.5	2.56564	1.39401	1.84047	0.0656989	0.244515	5.25398	ENSMUSG00000050335	16	Lgals3	protein_coding	ensembl_havana	chr14:47367751-47386160:+
629.155	3.61592	1.47785	2.44675				ENSMUSG00000002963	17	Pnkp	protein_coding	ensembl_havana	chr7:44857139-44862992:+
624.582	4.08647	1.82732	2.23632				ENSMUSG00000025959	13	Klf7	protein_coding	ensembl_havana	chr1:64029447-64122282:-
617.037	-0.997358	1.45266	-0.686574	0.492351	0.717043	4.5	ENSMUSG00000058624	12	Gda	protein_coding	ensembl_havana	chr19:21391307-21473445:-
616.996	0.944018	1.44749	0.652176	0.514288	0.733797	4.5	ENSMUSG00000028266	17	Lmo4	protein_coding	ensembl_havana	chr3:144188530-144205220:-
612.864	-29.0949	2.98693	-9.74073				ENSMUSG00000079659	5	Tmem243	protein_coding	ensembl_havana	chr5:9100668-9160986:+
609.049	-1.14831	1.76373	-0.651072	0.515	0.674909	5.25398	ENSMUSG00000026094	14	Stk17b	protein_coding	ensembl_havana	chr1:53755506-53785224:-
603.619	-6.3233	1.92544	-3.28407				ENSMUSG00000037260	8	Hgsnat	protein_coding	ensembl_havana	chr8:25944453-25976753:-
598.485	5.65174	1.91841	2.94605				ENSMUSG00000037683	14	Armc3	protein_coding	ensembl_havana	chr2:19199302-19310241:+
587.242	2.86372	1.42487	2.00981	0.0444518	0.224125	4.5	ENSMUSG00000021957	6	Tkt	protein_coding	ensembl_havana	chr14:30548359-30574722:+
583.822	0.687807	1.60867	0.427564	0.668969	0.773915	5.25398	ENSMUSG00000060216	15	Arrb2	protein_coding	ensembl_havana	chr11:70432635-70440828:+
578.785	2.19489	1.64653	1.33304	0.182519	0.382509	5.72755	ENSMUSG00000031328	15	Flna	protein_coding	ensembl_havana	chrX:74223461-74249820:-
574.21	1.49636	1.57791	0.948317	0.342968	0.531675	5.72755	ENSMUSG00000064351	1	mt-Co1	protein_coding	insdc	chrM:5328-6872:+
569.123	2.61488	1.79082	1.46016	0.144246	0.383102	4.5	ENSMUSG00000060063	9	Alox5ap	protein_coding	ensembl_havana	chr5:149264767-149288153:+
565.384	0.779595	1.50499	0.518007	0.604453	0.794707	4.5	ENSMUSG00000021270	13	Hsp90aa1	protein_coding	ensembl_havana	chr12:110690605-110702728:-
561.022	4.03251	1.85566	2.17309				ENSMUSG00000028849	17	Map7d1	protein_coding	ensembl_havana	chr4:126232167-126256343:-
557.263	0.118924	1.79169	0.0663754				ENSMUSG00000021250	13	Fos	protein_coding	ensembl_havana	chr12:85473890-85477273:+
555.779	2.07507	1.86946	1.10998				ENSMUSG00000063882	12	Uqcrh	protein_coding	ensembl_havana	chr4:116066965-116075071:-
555.39	2.63444	1.62196	1.62424	0.104325	0.320487	4.5	ENSMUSG00000039001	12	Rps21	protein_coding	ensembl_havana	chr2:180257377-180258445:+
553.364	1.85003	1.48986	1.24175	0.214328	0.467904	4.5	ENSMUSG00000026879	14	Gsn	protein_coding	ensembl_havana	chr2:35256380-35307892:+
550.315	1.33641	1.70551	0.783582	0.433285	0.666492	4.5	ENSMUSG00000070493	3	Chchd2	protein_coding	ensembl_havana	chr5:129881156-129887470:-
549.178	2.3335	1.5953	1.46273	0.143541	0.382509	4.5	ENSMUSG00000026480	12	Ncf2	protein_coding	ensembl_havana	chr1:152800194-152836991:+
548.819	2.36104	1.65656	1.42526				ENSMUSG00000004609	11	Cd33	protein_coding	ensembl_havana	chr7:43524216-43544428:-
548.682	1.76317	1.62756	1.08332	0.278668	0.541102	4.5	ENSMUSG00000017002	14	Slpi	protein_coding	ensembl_havana	chr2:164354070-164389095:-
543.551	4.89258	1.66222	2.94339	0.00324634	0.0763113	4.5	ENSMUSG00000024691	13	Fam111a	protein_coding	ensembl_havana	chr19:12545740-12589768:+
531.576	6.06765	1.55623	3.89893	9.66174e-05	0.0384946	5.72755	ENSMUSG00000055204	14	Ankrd17	protein_coding	ensembl_havana	chr5:90227166-90366577:-
527.87	4.00072	1.65237	2.42121	0.0154691	0.131534	5.25398	ENSMUSG00000003161	15	Sri	protein_coding	ensembl_havana	chr5:8046078-8069379:+
526.174	4.33944	1.55353	2.79327	0.00521776	0.0821579	5.25398	ENSMUSG00000024456	16	Diaph1	protein_coding	ensembl_havana	chr18:37843601-37935476:-
523.405	3.17595	2.01918	1.57289				ENSMUSG00000025316	16	Banp	protein_coding	ensembl_havana	chr8:121949750-122029258:+
520.805	1.02634	1.56886	0.654192	0.512988	0.733797	4.5	ENSMUSG00000058794	12	Nfe2	protein_coding	ensembl_havana	chr15:103248212-103258403:-
514.128	2.94449	1.61428	1.82403				ENSMUSG00000025161	16	Slc16a3	protein_coding	ensembl_havana	chr11:120948480-120960868:+
513.809	-0.09679	1.52562	-0.0634431	0.949414	0.905972	5.25398	ENSMUSG00000029062	14	Cdk11b	protein_coding	ensembl_havana	chr4:155624854-155649938:+
513.532	1.18289	1.4669	0.806388	0.420019	0.655933	4.5	ENSMUSG00000019210	10	Atp6v1e1	protein_coding	ensembl_havana	chr6:120794305-120822793:-
501.854	-0.189859	1.61236	-0.117752	0.906264	0.957845	4.5	ENSMUSG00000004880	11	Lbr	protein_coding	ensembl_havana	chr1:181815335-181843046:-
498.177	-3.55464	1.60776	-2.21092	0.0270413	0.185519	4.5	ENSMUSG00000021281	15	Tnfaip2	protein_coding	ensembl_havana	chr12:111442469-111455018:+
493.988	3.29984	1.79743	1.83586				ENSMUSG00000057649	5	Brd9	protein_coding	ensembl	chr13:73937838-73960894:+
487.162	-0.141764	1.41039	-0.100514	0.919936	0.889955	5.25398	ENSMUSG00000024608	10	Rps14	protein_coding	ensembl_havana	chr18:60774510-60778546:+
473.797	-0.931509	1.42482	-0.653775	0.513257	0.733797	4.5	ENSMUSG00000024858	13	Grk2	protein_coding	ensembl_havana	chr19:4286001-4306222:-
471.382	3.21753	1.94134	1.65737				ENSMUSG00000007038	5	Neu1	protein_coding	ensembl_havana	chr17:34931253-34935953:+
469.556	4.92094	1.76012	2.7958				ENSMUSG00000031029	6	Eif3f	protein_coding	ensembl_havana	chr7:108934417-108942951:+
468.128	5.75727	1.91402	3.00795				ENSMUSG00000031370	12	Zrsr2	protein_coding	ensembl_havana	chrX:163935443-163958661:-
466.729	0.2696	1.5175	0.17766	0.85899	0.82955	5.72755	ENSMUSG00000028382	15	Ptbp3	protein_coding	ensembl_havana	chr4:59471868-59549364:-
464.629	2.38932	1.61393	1.48044	0.138757	0.376699	4.5	ENSMUSG00000025290	16	Rps24	protein_coding	ensembl	chr14:24490681-24496146:+
464.424	1.77703	1.98462	0.895402				ENSMUSG00000026867	18	Gapvd1	protein_coding	ensembl_havana	chr2:34674594-34755232:-
461.573	2.58911	1.87043	1.38423	0.166288	0.41254	4.5	ENSMUSG00000030589	15	Rasgrp4	protein_coding	ensembl_havana	chr7:29134851-29153961:+
457.589	2.76828	1.61555	1.71352	0.0866166	0.271354	5.25398	ENSMUSG00000028581	17	Laptm5	protein_coding	ensembl_havana	chr4:130913125-130936141:+
456.996	2.00189	1.82368	1.09772	0.272326	0.534748	4.5	ENSMUSG00000070394	10	Tmem256	protein_coding	ensembl_havana	chr11:69838514-69839618:+
453.504	-0.746369	1.57168	-0.474887	0.634867	0.814139	4.5	ENSMUSG00000027940	18	Tpm3	protein_coding	ensembl_havana	chr3:90072649-90100902:+
452.448	1.6994	1.67157	1.01665	0.309321	0.527371	5.25398	ENSMUSG00000030083	11	Abtb1	protein_coding	ensembl_havana	chr6:88835914-88841984:-
450.199	2.29542	1.52599	1.50421	0.132526	0.365418	4.5	ENSMUSG00000005087	17	Cd44	protein_coding	ensembl_havana	chr2:102811141-102901665:-
448.564	1.40709	1.48229	0.949266	0.342485	0.551509	5.25398	ENSMUSG00000000787	12	Ddx3x	protein_coding	ensembl_havana	chrX:13280970-13294052:+
443.84	4.78127	1.53369	3.11748	0.00182402	0.0727417	4.5	ENSMUSG00000001128	7	Cfp	protein_coding	ensembl_havana	chrX:20925454-20931555:-
440.621	1.11229	1.4859	0.748564	0.45412	0.685098	4.5	ENSMUSG00000090841	1	Myl6	protein_coding	ensembl	chr10:128490860-128493875:-
440.565	-5.57243	1.7303	-3.2205				ENSMUSG00000026775	9	Yme1l1	protein_coding	ensembl_havana	chr2:23156369-23199260:+
440.264	1.5582	1.44335	1.07957	0.280333	0.475564	5.72755	ENSMUSG00000030403	9	Vasp	protein_coding	ensembl_havana	chr7:19256929-19271817:-
439.127	3.58696	1.94165	1.84738				ENSMUSG00000029616	9	Erp29	protein_coding	ensembl_havana	chr5:121428590-121452506:-
438.567	2.93788	1.55808	1.88558	0.0593519	0.250109	4.5	ENSMUSG00000033220	6	Rac2	protein_coding	ensembl	chr15:78559169-78572783:-
433.66	-0.332671	1.5951	-0.208557	0.834794	0.918488	4.5	ENSMUSG00000062593	16	Lilrb4a	protein_coding	ensembl	chr10:51480679-51496613:+
432.63	1.87815	1.37306	1.36785	0.171358	0.419992	4.5	ENSMUSG00000053560	4	Ier2	protein_coding	ensembl	chr8:84661331-84662852:-
432.547	3.33205	1.60207	2.07984				ENSMUSG00000034647	14	Ankrd12	protein_coding	ensembl_havana	chr17:65967501-66077089:-
430.109	3.62055	1.86484	1.94148				ENSMUSG00000017421	18	Zfp207	protein_coding	ensembl_havana	chr11:80383279-80405733:+
429.149	4.97011	1.7211	2.88775	0.00388011	0.080195	4.5	ENSMUSG00000025362	5	Rps26	protein_coding	ensembl	chr10:128624530-128626506:-
429.133	2.78568	1.51613	1.83737	0.0661558	0.263609	4.5	ENSMUSG00000009687	14	Fxyd5	protein_coding	ensembl_havana	chr7:31032722-31042481:-
429.043	3.03043	1.65442	1.83172	0.0669937	0.247304	5.25398	ENSMUSG00000031622	16	Sin3b	protein_coding	ensembl_havana	chr8:72723285-72758201:+
428.897	4.37977	1.47594	2.96745	0.00300279	0.0763113	5.25398	ENSMUSG00000064246	10	Chil1	protein_coding	ensembl_havana	chr1:134182176-134190181:+
427.145	-11.1654	2.62752	-4.24939				ENSMUSG00000049044	16	Rapgef4	protein_coding	ensembl_havana	chr2:71981240-72257474:+
426.937	1.06386	1.42955	0.744194	0.456759	0.610559	5.72755	ENSMUSG00000054717	7	Hmgb2	protein_coding	ensembl_havana	chr8:57511907-57515999:+
426.876	-9.08321	2.30859	-3.93452				ENSMUSG00000031667	16	Aktip	protein_coding	ensembl_havana	chr8:91111784-91199976:-
426.851	2.16656	1.60834	1.34708	0.177956	0.428436	4.5	ENSMUSG00000050732	9	Vamp8	protein_coding	ensembl_havana	chr6:72385223-72390703:-
426.357	2.59633	1.4992	1.73181	0.0833081	0.267003	5.25398	ENSMUSG00000004207	14	Psap	protein_coding	ensembl_havana	chr10:60277627-60302597:+
422.79	0.86967	1.80023	0.483087	0.629034	0.746968	5.25398	ENSMUSG00000056708	5	Ier5	protein_coding	ensembl_havana	chr1:155096361-155099636:-
420.779	5.4297	2.00432	2.709				ENSMUSG00000110266	1	Gm32742	protein_coding	havana	chr9:51130307-51165517:-
420.086	0.92723	1.86712	0.496609	0.619465	0.741204	5.25398	ENSMUSG00000018983	9	E2f2	protein_coding	ensembl_havana	chr4:136172394-136196057:+
418.962	4.57551	1.82702	2.50435				ENSMUSG00000049091	6	Sephs2	protein_coding	ensembl_havana	chr7:127271879-127274055:-
417.844	5.22638	1.68087	3.10933				ENSMUSG00000036833	16	Pnpla7	protein_coding	ensembl_havana	chr2:24976033-25054057:+
417.709	1.29314	1.51741	0.852202	0.394102	0.638103	4.5	ENSMUSG00000030536	10	Iqgap1	protein_coding	ensembl_havana	chr7:80711583-80825974:-
417.483	1.38036	1.6754	0.823896	0.409999	0.648668	4.5	ENSMUSG00000039158	11	Akna	protein_coding	ensembl_havana	chr4:63367125-63403354:-
415.547	0.484957	1.52363	0.318292	0.750264	0.784898	5.72755	ENSMUSG00000095041	7	AC149090.1	protein_coding	ensembl	chrUn_JH584304:52190-59690:-
414.406	-7.27074	2.20888	-3.2916				ENSMUSG00000068523	12	Gng5	protein_coding	ensembl_havana	chr3:146499807-146505572:+
413.627	-4.7714	1.94086	-2.45839				ENSMUSG00000024565	8	Sall3	protein_coding	ensembl	chr18:80966376-80986578:-
412.096	2.76822	1.35842	2.03783				ENSMUSG00000061983	6	Rps12	protein_coding	ensembl	chr10:23785211-23787195:-
411.979	3.45002	1.61399	2.13757	0.0325518	0.198844	4.5	ENSMUSG00000029860	16	Zyx	protein_coding	ensembl_havana	chr6:42349630-42360213:+
411.623	1.54869	1.93542	0.800179				ENSMUSG00000021428	8	Riok1	protein_coding	ensembl	chr13:38036989-38061433:+
411.502	0.348018	1.51591	0.229577	0.81842	0.818697	5.72755	ENSMUSG00000015932	8	Dstn	protein_coding	ensembl_havana	chr2:143915320-143943324:+
410.28	2.16022	1.79469	1.20367	0.228716	0.484983	4.5	ENSMUSG00000058755	3	Osm	protein_coding	ensembl_havana	chr11:4236420-4241026:+
405.353	-8.58995	2.59609	-3.3088				ENSMUSG00000096409	3	Olfr890	protein_coding	ensembl_havana	chr9:38142517-38148375:+
404.532	1.80433	1.63568	1.10311	0.269981	0.531675	4.5	ENSMUSG00000016559	14	H3f3b	protein_coding	ensembl_havana	chr11:116021912-116027962:-
401.91	4.84389	1.52408	3.17824	0.00148171	0.066033	5.72755	ENSMUSG00000027829	15	Ccnl1	protein_coding	ensembl_havana	chr3:65946151-65958249:-
401.542	-6.34197	2.41105	-2.63038				ENSMUSG00000026768	10	Itga8	protein_coding	ensembl_havana	chr2:12106632-12301922:-
400.133	-6.36385	1.85319	-3.43399				ENSMUSG00000022641	15	Bbx	protein_coding	ensembl_havana	chr16:50191844-50432390:-
399.075	1.91603	1.34858	1.42078	0.155382	0.397714	4.5	ENSMUSG00000004266	15	Ptpn6	protein_coding	ensembl_havana	chr6:124720707-124738714:-
398.069	1.17717	1.68133	0.700142	0.483838	0.710206	4.5	ENSMUSG00000020372	15	Rack1	protein_coding	ensembl_havana	chr11:48800332-48806434:+
397.953	1.95137	1.65068	1.18216	0.237142	0.493641	4.5	ENSMUSG00000038733	13	Wdr26	protein_coding	ensembl_havana	chr1:181173228-181211552:-
397.705	4.60043	1.80665	2.54638				ENSMUSG00000074785	4	Plxnc1	protein_coding	ensembl_havana	chr10:94790866-94944578:-
397.345	9.43661	2.26672	4.16312				ENSMUSG00000018196	18	Glrx2	protein_coding	ensembl_havana	chr1:143716338-143749676:+
397.004	3.08466	1.60525	1.92161	0.0546548	0.240348	4.5	ENSMUSG00000025236	11	Adpgk	protein_coding	ensembl_havana	chr9:59291558-59324052:+
392.186	0.769331	2.0692	0.371801				ENSMUSG00000040713	12	Creg1	protein_coding	ensembl_havana	chr1:165763746-165775308:+
389.374	2.51286	1.76578	1.42309	0.154711	0.396955	4.5	ENSMUSG00000027012	15	Dync1i2	protein_coding	ensembl_havana	chr2:71211706-71263303:+
384.691	0.0700792	1.55197	0.0451549	0.963984	0.990631	4.5	ENSMUSG00000022443	16	Myh9	protein_coding	ensembl_havana	chr15:77760587-77842175:-
384.49	3.06216	1.86367	1.64308				ENSMUSG00000031652	11	N4bp1	protein_coding	ensembl_havana	chr8:86808160-86885258:-
383.419	3.52589	1.7696	1.99248				ENSMUSG00000028333	10	Anp32b	protein_coding	ensembl_havana	chr4:46450902-46472657:+
382.512	1.40169	1.77885	0.787976	0.430711	0.664095	4.5	ENSMUSG00000026288	14	Inpp5d	protein_coding	ensembl_havana	chr1:87620312-87720507:+
380.595	2.14546	1.70856	1.25571	0.209221	0.430356	5.25398	ENSMUSG00000026180	8	Cxcr2	protein_coding	ensembl_havana	chr1:74153989-74161246:+
379.783	-3.29935	1.54432	-2.13644				ENSMUSG00000028961	15	Pgd	protein_coding	ensembl_havana	chr4:149149991-149166771:-
378.167	4.44813	1.88793	2.35608				ENSMUSG00000021453	2	Gadd45g	protein_coding	ensembl_havana	chr13:51846678-51848468:+
374.706	0.970433	1.54676	0.627398	0.530398	0.652065	5.72755	ENSMUSG00000006304	14	Arpc2	protein_coding	ensembl_havana	chr1:74236084-74268209:+
373.629	-1.58985	1.67088	-0.951502	0.341349	0.530393	5.72755	ENSMUSG00000031827	13	Cotl1	protein_coding	ensembl_havana	chr8:119809222-119840544:-
368.964	7.2349	2.13296	3.39195				ENSMUSG00000075062	4	Olfr1271	protein_coding	ensembl_havana	chr2:90260546-90271032:-
367.386	2.16338	1.39998	1.54529	0.122275	0.321413	5.25398	ENSMUSG00000022283	14	Pabpc1	protein_coding	ensembl_havana	chr15:36595661-36608973:-
367.341	6.46992	1.94265	3.33045				ENSMUSG00000030538	15	Cib1	protein_coding	ensembl_havana	chr7:80227147-80232813:-
367.093	2.98361	2.03072	1.46924				ENSMUSG00000029076	14	Sdf4	protein_coding	ensembl_havana	chr4:155992872-156013610:+
367.039	3.83993	1.93978	1.97957				ENSMUSG00000035024	16	Ncapd3	protein_coding	ensembl_havana	chr9:27030175-27095315:+
366.85	0.367063	1.82906	0.200684	0.840945	0.921109	4.5	ENSMUSG00000000204	16	Slfn4	protein_coding	ensembl_havana	chr11:83175186-83190216:+
364.74	5.90006	1.92861	3.05922				ENSMUSG00000032435	9	Dync1li1	protein_coding	ensembl_havana	chr9:114688790-114724302:+
364.494	-0.711529	1.86295	-0.381937	0.702508	0.755372	5.72755	ENSMUSG00000058715	11	Fcer1g	protein_coding	ensembl_havana	chr1:171229572-171234365:-
360.499	4.95012	2.13498	2.31858				ENSMUSG00000043036	13	Ccdc63	protein_coding	ensembl_havana	chr5:122108040-122140823:-
359.449	5.15485	1.7705	2.91152				ENSMUSG00000024483	18	Ankhd1	protein_coding	ensembl_havana	chr18:36559987-36665917:+
358.256	5.70379	1.54356	3.69521	0.000219705	0.0529872	4.5	ENSMUSG00000026547	15	Tagln2	protein_coding	ensembl_havana	chr1:172500047-172507380:+
356.293	-2.76071	2.00056	-1.37997				ENSMUSG00000034160	13	Ogt	protein_coding	ensembl_havana	chrX:101640060-101684351:+
353.437	5.49931	1.70977	3.2164				ENSMUSG00000021892	14	Sh3bp5	protein_coding	ensembl_havana	chr14:31359880-31436078:-
353.312	2.73364	1.77119	1.54339	0.122737	0.348408	4.5	ENSMUSG00000046229	9	Scand1	protein_coding	ensembl	chr2:156311847-156312704:-
351.467	0.0821258	1.79397	0.0457788	0.963487	0.990441	4.5	ENSMUSG00000001794	13	Capns1	protein_coding	ensembl_havana	chr7:30186936-30198811:-
350.467	1.12861	1.66728	0.676915	0.49846	0.721335	4.5	ENSMUSG00000024953	16	Prdx5	protein_coding	ensembl_havana	chr19:6906697-6910106:-
349.757	5.01874	1.88367	2.66434				ENSMUSG00000038914	15	Dido1	protein_coding	ensembl_havana	chr2:180657964-180709999:-
348.551	3.1669	1.93763	1.63442				ENSMUSG00000031807	10	Pgls	protein_coding	ensembl_havana	chr8:71592176-71601092:+
347.911	3.90484	1.81456	2.15195				ENSMUSG00000052749	9	Trim30b	protein_coding	ensembl_havana	chr7:104355382-104369884:-
347.729	2.75863	1.80808	1.52572	0.127079	0.326162	5.25398	ENSMUSG00000051316	8	Taf7	protein_coding	ensembl_havana	chr18:37640491-37644204:-
346.562	2.32298	1.58776	1.46305	0.143453	0.382509	4.5	ENSMUSG00000041870	16	Ankrd13a	protein_coding	ensembl_havana	chr5:114774677-114806200:+
345.157	2.06688	1.8796	1.09964				ENSMUSG00000038393	14	Txnip	protein_coding	ensembl_havana	chr3:96557957-96561883:+
344.299	2.71263	1.92094	1.41213	0.15791	0.400546	4.5	ENSMUSG00000008384	8	Sertad1	protein_coding	ensembl_havana	chr7:27486910-27490316:+
343.035	1.35128	1.59753	0.84586	0.397631	0.641099	4.5	ENSMUSG00000022564	6	Grina	protein_coding	ensembl	chr15:76246807-76249904:+
342.5	2.32931	1.41976	1.64064	0.100873	0.315371	4.5	ENSMUSG00000025508	13	Rplp2	protein_coding	ensembl_havana	chr7:141447370-141451585:+
339.956	-0.164866	1.67528	-0.0984107	0.921606	0.890335	5.25398	ENSMUSG00000022858	15	Tra2b	protein_coding	ensembl_havana	chr16:22244549-22266005:-
339.01	0.346837	1.70821	0.203041	0.839103	0.92036	4.5	ENSMUSG00000043091	8	Tuba1c	protein_coding	ensembl	chr15:99029891-99038105:+
335.657	-8.90678	2.3012	-3.8705				ENSMUSG00000040452	8	Cdh12	protein_coding	ensembl_havana	chr15:21111452-21589533:+
333.765	-0.922434	1.50444	-0.613142	0.539783	0.746968	4.5	ENSMUSG00000004665	10	Cnn2	protein_coding	ensembl_havana	chr10:79988584-79996062:+
331.048	-0.598074	1.73528	-0.344656	0.730353	0.859192	4.5	ENSMUSG00000020077	14	Srgn	protein_coding	ensembl_havana	chr10:62493833-62527451:-
329.418	3.53168	1.39429	2.53296	0.0113103	0.107816	5.72755	ENSMUSG00000041235	11	Chd7	protein_coding	ensembl_havana	chr4:8690406-8867659:+
327.784	2.23927	1.41002	1.58811	0.112261	0.330153	4.5	ENSMUSG00000045962	16	Wnk1	protein_coding	ensembl_havana	chr6:119923969-120038672:-
327.619	5.5507	2.03093	2.73308				ENSMUSG00000000827	18	Tpd52l2	protein_coding	ensembl_havana	chr2:181497142-181517966:+
325.415	6.25184	1.93675	3.228				ENSMUSG00000032123	5	Dpagt1	protein_coding	ensembl_havana	chr9:44326019-44333900:+
324.621	0.29172	2.03117	0.143622				ENSMUSG00000063870	12	Chd4	protein_coding	ensembl_havana	chr6:125095981-125130591:+
324.518	1.10679	1.40385	0.788393	0.430467	0.664086	4.5	ENSMUSG00000015889	8	Lta4h	protein_coding	ensembl_havana	chr10:93453411-93484875:+
324.512	2.1765	1.59985	1.36044				ENSMUSG00000021134	17	Srsf5	protein_coding	ensembl_havana	chr12:80945504-80950507:+
323.16	1.98936	1.93689	1.02709	0.304377	0.559835	4.5	ENSMUSG00000019873	7	Reep3	protein_coding	ensembl	chr10:67009189-67096988:-
319.996	6.17619	2.11296	2.92301	0.0034667	0.0781953	4.5	ENSMUSG00000061904	12	Slc25a3	protein_coding	ensembl_havana	chr10:91116574-91124059:-
318.729	1.26385	1.7951	0.704057	0.481397	0.708259	4.5	ENSMUSG00000063065	13	Mapk3	protein_coding	ensembl_havana	chr7:126759601-126765819:+
318.609	1.32014	1.71399	0.770212				ENSMUSG00000026158	11	Ogfrl1	protein_coding	ensembl_havana	chr1:23366424-23397772:-
318.296	4.67439	1.86919	2.50076				ENSMUSG00000049999	4	Ppp1r3d	protein_coding	ensembl_havana	chr2:178411206-178414472:-
317.495	1.49361	1.89219	0.789353				ENSMUSG00000013663	7	Pten	protein_coding	ensembl_havana	chr19:32757497-32826160:+
317.463	4.83547	1.42378	3.39622	0.00068323	0.0631664	5.25398	ENSMUSG00000041697	8	Cox6a1	protein_coding	ensembl_havana	chr5:115345642-115348981:-
317.122	5.56341	1.84217	3.02003				ENSMUSG00000018585	9	Atox1	protein_coding	ensembl_havana	chr11:55446641-55461239:-
316.427	1.71001	1.4479	1.18103	0.237593	0.493641	4.5	ENSMUSG00000035674	13	Ndufa3	protein_coding	ensembl_havana	chr7:3617373-3620327:+
316.158	0.9231	1.67234	0.551981	0.580961	0.721274	5.25398	ENSMUSG00000000346	8	Dazap2	protein_coding	ensembl	chr15:100615628-100620731:+
315.604	5.22123	2.10516	2.4802				ENSMUSG00000034071	15	Zfp551	protein_coding	ensembl_havana	chr7:12415153-12422751:-
312.37	0.15976	1.76766	0.0903797	0.927986	0.971554	4.5	ENSMUSG00000026395	16	Ptprc	protein_coding	ensembl_havana	chr1:138062861-138175708:-
311.577	0.092518	1.67982	0.0550761	0.956078	0.868599	5.72755	ENSMUSG00000007891	16	Ctsd	protein_coding	ensembl_havana	chr7:142375911-142388038:-
311.339	-0.498296	2.33057	-0.213808	0.830696	0.823722	5.72755	ENSMUSG00000017639	13	Rab11fip4	protein_coding	ensembl_havana	chr11:79591212-79698023:+
310.866	4.3247	1.43438	3.01502	0.0025696	0.0763113	4.5	ENSMUSG00000029915	14	Clec5a	protein_coding	ensembl_havana	chr6:40574894-40585821:-
309.724	4.86784	1.8658	2.60898				ENSMUSG00000032557	12	Uba5	protein_coding	ensembl_havana	chr9:104046599-104063134:-
308.448	2.28175	1.57193	1.45156	0.146624	0.385353	4.5	ENSMUSG00000028161	17	Ppp3ca	protein_coding	ensembl_havana	chr3:136670124-136937727:+
306.68	3.36347	1.54038	2.18353	0.0289967	0.178043	5.25398	ENSMUSG00000034349	14	Smc4	protein_coding	ensembl_havana	chr3:69004738-69034623:+
306.364	-3.31142	1.55806	-2.12534	0.0335582	0.200262	4.5	ENSMUSG00000030786	18	Itgam	protein_coding	ensembl_havana	chr7:128062640-128118491:+
305.976	4.71864	1.96754	2.39824				ENSMUSG00000039031	15	Arhgap18	protein_coding	ensembl_havana	chr10:26753421-26918648:+
305.445	1.17706	1.60612	0.732855	0.463647	0.693173	4.5	ENSMUSG00000042613	9	Pbxip1	protein_coding	ensembl_havana	chr3:89436706-89450952:+
304.977	4.55062	1.65798	2.74468	0.00605695	0.093043	4.5	ENSMUSG00000033379	13	Atp6v0b	protein_coding	ensembl_havana	chr4:117884326-117887333:-
304.05	1.89852	1.61126	1.17828				ENSMUSG00000039105	6	Atp6v1g1	protein_coding	ensembl_havana	chr4:63544772-63550750:+
302.742	-0.0446324	1.81886	-0.0245387	0.980423	0.879195	5.72755	ENSMUSG00000020460	15	Rps27a	protein_coding	ensembl_havana	chr11:29545846-29548109:-
302.691	0.480801	1.62459	0.295953	0.767266	0.877314	4.5	ENSMUSG00000032518	6	Rpsa	protein_coding	ensembl_havana	chr9:120127689-120132369:+
301.624	3.01828	1.80917	1.66832				ENSMUSG00000039934	12	Gsap	protein_coding	ensembl_havana	chr5:21186255-21315132:+
301.261	0.781377	1.73394	0.450638	0.652251	0.823722	4.5	ENSMUSG00000042265	13	Trem1	protein_coding	ensembl_havana	chr17:48232768-48246924:+
300.827	-0.620415	1.73114	-0.358384	0.720056	0.854396	4.5	ENSMUSG00000026074	14	Map4k4	protein_coding	ensembl_havana	chr1:39900913-40026310:+
299.498	-0.256081	1.59504	-0.160548	0.872449	0.940343	4.5	ENSMUSG00000026360	9	Rgs2	protein_coding	ensembl_havana	chr1:143999338-144004161:-
299.191	-4.17447	2.06112	-2.02534	0.0428326	0.220869	4.5	ENSMUSG00000018372	13	Cep95	protein_coding	ensembl_havana	chr11:106789252-106819930:+
299.136	3.47864	1.93737	1.79555				ENSMUSG00000059119	9	Nap1l4	protein_coding	ensembl_havana	chr7:143513579-143549106:-
299.078	4.93662	1.66242	2.96953	0.00298252	0.0763113	4.5	ENSMUSG00000053063	11	Clec12a	protein_coding	ensembl_havana	chr6:129342691-129365303:+
298.449	6.49144	1.93454	3.35554	0.000792097	0.0645746	4.5	ENSMUSG00000049659	15	Aftph	protein_coding	ensembl_havana	chr11:20685084-20741589:-
297.868	1.43052	1.57407	0.908804	0.363453	0.567026	5.25398	ENSMUSG00000022831	14	Hcls1	protein_coding	ensembl_havana	chr16:36934983-36963212:+
295.432	3.80899	1.67328	2.27636				ENSMUSG00000027447	6	Cst3	protein_coding	ensembl_havana	chr2:148871722-148875692:-
294.825	1.80539	1.47641	1.22283	0.221395	0.475811	4.5	ENSMUSG00000022108	7	Itm2b	protein_coding	ensembl	chr14:73362231-73385271:-
294.662	0.734261	1.63787	0.448302	0.653935	0.823722	4.5	ENSMUSG00000026068	11	Il18rap	protein_coding	ensembl_havana	chr1:40515362-40551705:+
293.75	4.68772	1.90297	2.46337				ENSMUSG00000027466	15	Rbck1	protein_coding	ensembl_havana	chr2:152316334-152332653:-
292.881	4.57044	1.59772	2.86061	0.0042283	0.0813998	4.5	ENSMUSG00000050608	11	Minos1	protein_coding	ensembl_havana	chr4:139101814-139131113:-
291.832	1.98216	1.40642	1.40937	0.158725	0.352422	5.72755	ENSMUSG00000033213	16	AA467197	protein_coding	ensembl_havana	chr2:122636986-122641191:+
291.81	5.26797	2.0767	2.5367				ENSMUSG00000038365	8	Fbxo25	protein_coding	ensembl_havana	chr8:13907803-13940522:+
290.635	2.97208	1.75741	1.69117	0.0908045	0.267003	5.72755	ENSMUSG00000008036	11	Ap2s1	protein_coding	ensembl_havana	chr7:16738410-16749294:+
290.269	-1.66443	1.54378	-1.07815	0.280965	0.497071	5.25398	ENSMUSG00000094483	2	Purb	protein_coding	ensembl_havana	chr11:6467599-6475917:-
289.415	2.021	1.68452	1.19975	0.230237	0.486131	4.5	ENSMUSG00000052212	6	Cd177	protein_coding	ensembl_havana	chr7:24743983-24760311:-
288.075	1.54043	1.5672	0.982924	0.325645	0.541184	5.25398	ENSMUSG00000027620	16	Rbm39	protein_coding	ensembl_havana	chr2:156147239-156180238:-
287.553	1.77676	1.51074	1.17609	0.239559	0.439278	5.72755	ENSMUSG00000066632	2	Pgk1-rs7	protein_coding	ensembl	chr12:10898566-10900296:-
286.872	3.61995	1.81264	1.99706				ENSMUSG00000028480	14	Glipr2	protein_coding	ensembl_havana	chr4:43957401-43979118:+
286.146	1.17994	2.21603	0.532455				ENSMUSG00000055065	6	Ddx17	protein_coding	ensembl	chr15:79527707-79546741:-
285.477	-0.12166	1.89405	-0.0642328	0.948785	0.982962	4.5	ENSMUSG00000032562	13	Gnai2	protein_coding	ensembl_havana	chr9:107614125-107635367:-
283.562	-2.10725	2.51971	-0.836307	0.402982	0.644213	4.5	ENSMUSG00000025997	13	Ikzf2	protein_coding	ensembl_havana	chr1:69531214-69687245:-
283.433	0.401393	1.71401	0.234183	0.814843	0.906269	4.5	ENSMUSG00000022148	15	Fyb	protein_coding	ensembl_havana	chr15:6579871-6663313:+
282.899	4.98726	1.73923	2.86751	0.00413717	0.0763113	5.72755	ENSMUSG00000026219	14	Trip12	protein_coding	ensembl_havana	chr1:84721189-84840516:-
282.246	3.30831	1.63116	2.0282	0.0425402	0.220435	4.5	ENSMUSG00000037902	18	Sirpa	protein_coding	ensembl_havana	chr2:129592835-129632228:+
279.833	4.23468	1.76787	2.39535				ENSMUSG00000026222	16	Sp100	protein_coding	ensembl_havana	chr1:85649988-85709998:+
278.868	5.59681	1.78695	3.13205				ENSMUSG00000042682	8	Selenok	protein_coding	ensembl_havana	chr14:29968308-29975074:+
276.615	5.02425	1.80031	2.79077	0.00525821	0.0821579	5.25398	ENSMUSG00000053317	11	Sec61b	protein_coding	ensembl_havana	chr4:47474658-47483242:+
276.331	1.83075	1.6999	1.07697	0.281492	0.475811	5.72755	ENSMUSG00000040659	3	Efhd2	protein_coding	ensembl_havana	chr4:141858142-141874920:-
276.079	4.01657	1.99463	2.0137				ENSMUSG00000021693	19	Kif2a	protein_coding	ensembl_havana	chr13:106958996-107022126:-
275.648	1.58221	1.9349	0.817719	0.413517	0.649933	4.5	ENSMUSG00000073616	10	Myeov2	protein_coding	ensembl_havana	chr1:92637145-92641985:-
275.09	5.02498	1.91318	2.62651				ENSMUSG00000027652	15	Ralgapb	protein_coding	ensembl_havana	chr2:158409848-158499253:+
274.212	-0.472785	2.11972	-0.223041				ENSMUSG00000078763	2	Slfn1	protein_coding	ensembl_havana	chr11:83116849-83122670:+
273.685	1.29116	1.72547	0.748295	0.454282	0.607574	5.72755	ENSMUSG00000038366	15	Lasp1	protein_coding	ensembl_havana	chr11:97799000-97838764:+
273.607	-8.27596	2.02379	-4.08933				ENSMUSG00000015002	17	Efr3a	protein_coding	ensembl_havana	chr15:65787034-65873816:+
272.883	2.78815	1.71485	1.62588	0.103974	0.319906	4.5	ENSMUSG00000026447	16	Pik3c2b	protein_coding	ensembl_havana	chr1:133045667-133108687:+
272.85	7.50948	2.40958	3.11651				ENSMUSG00000073639	5	Rab18	protein_coding	ensembl	chr18:6765205-6790231:+
272.107	0.572962	1.60562	0.356847	0.721206	0.803727	5.25398	ENSMUSG00000023944	14	Hsp90ab1	protein_coding	ensembl_havana	chr17:45567775-45573271:-
269.887	4.48437	1.87453	2.39226	0.0167448	0.131534	5.72755	ENSMUSG00000002395	14	Use1	protein_coding	ensembl_havana	chr8:71366848-71369732:+
269.037	5.81202	2.20675	2.63375	0.00844478	0.0998908	5.25398	ENSMUSG00000024516	12	Sec11c	protein_coding	ensembl_havana	chr18:65800549-65817665:+
268.323	1.87625	1.62866	1.15202	0.249312	0.467134	5.25398	ENSMUSG00000036390	8	Gadd45a	protein_coding	ensembl_havana	chr6:67035096-67037457:-
266.544	0.67208	1.64371	0.408879	0.682629	0.831473	4.5	ENSMUSG00000050299	7	Gm9843	protein_coding	ensembl	chr16:76403209-76403712:-
265.788	2.61986	1.45686	1.79829	0.0721308	0.267663	4.5	ENSMUSG00000023010	14	Tmbim6	protein_coding	ensembl_havana	chr15:99392882-99410049:+
265.547	-4.68736	2.51958	-1.86037				ENSMUSG00000030606	8	Hapln3	protein_coding	ensembl_havana	chr7:79115102-79131018:-
265.004	-0.219536	1.45196	-0.1512	0.879818	0.944772	4.5	ENSMUSG00000001289	12	Pfdn5	protein_coding	ensembl_havana	chr15:102326116-102331873:+
264.869	1.21432	1.87333	0.648213	0.516847	0.734049	4.5	ENSMUSG00000034210	13	Efcab14	protein_coding	ensembl_havana	chr4:115737744-115777327:+
264.668	4.45127	1.4318	3.10887	0.00187803	0.0727417	4.5	ENSMUSG00000044734	15	Serpinb1a	protein_coding	ensembl_havana	chr13:32842092-32851185:-
264.551	-1.4691	1.61664	-0.908737	0.363489	0.567026	5.25398	ENSMUSG00000055447	18	Cd47	protein_coding	ensembl_havana	chr16:49855618-49915010:+
263.918	1.6412	1.72188	0.953145	0.340517	0.591976	4.5	ENSMUSG00000002897	5	Il17ra	protein_coding	ensembl_havana	chr6:120463247-120487559:+
263.692	4.34405	1.67481	2.59375				ENSMUSG00000029004	15	Kmt2e	protein_coding	ensembl_havana	chr5:23434441-23504235:+
263.414	1.89235	1.45428	1.30123	0.19318	0.445625	4.5	ENSMUSG00000027360	5	Hdc	protein_coding	ensembl_havana	chr2:126593667-126619299:-
262.991	1.45502	2.2266	0.653473				ENSMUSG00000018287	12	Spag7	protein_coding	ensembl_havana	chr11:70663771-70669416:-
262.318	-2.30048	2.15109	-1.06945	0.284868	0.478098	5.72755	ENSMUSG00000014313	14	Cox6c	protein_coding	ensembl_havana	chr15:35925886-35938246:-
261.589	3.05739	1.80713	1.69185	0.0906751	0.267003	5.72755	ENSMUSG00000003865	16	Gys1	protein_coding	ensembl_havana	chr7:45434844-45456619:+
260.756	-2.51592	2.00017	-1.25786	0.208443	0.461919	4.5	ENSMUSG00000003484	4	Cyp4f18	protein_coding	ensembl_havana	chr8:71988482-72009626:-
260.52	3.07039	1.89628	1.61917	0.105411	0.321634	4.5	ENSMUSG00000039960	5	Rhou	protein_coding	ensembl_havana	chr8:123653929-123663884:+
258.567	2.6352	1.78412	1.47703	0.139668	0.378215	4.5	ENSMUSG00000003153	10	Slc2a3	protein_coding	ensembl_havana	chr6:122727809-122801640:-
258.313	0.634256	1.8687	0.33941				ENSMUSG00000096768	7	Erdr1	protein_coding	ensembl	chrY:90784738-90816464:+
258.137	8.19943	2.35309	3.48454				ENSMUSG00000034024	7	Cct2	protein_coding	ensembl	chr10:117050998-117063814:-
256.11	1.32567	1.74826	0.75828	0.448283	0.680405	4.5	ENSMUSG00000035530	13	Eif1	protein_coding	ensembl_havana	chr11:100319885-100322096:+
254.719	2.09705	1.46853	1.428	0.153293	0.363282	5.25398	ENSMUSG00000072620	3	Slfn2	protein_coding	ensembl_havana	chr11:83065112-83070678:+
254.091	1.17733	1.5674	0.751137	0.45257	0.684145	4.5	ENSMUSG00000024290	8	Rock1	protein_coding	ensembl	chr18:10064401-10181792:-
252.975	5.42987	1.99851	2.71695				ENSMUSG00000028271	9	Gtf2b	protein_coding	ensembl_havana	chr3:142765045-142783606:+
251.412	2.13245	2.15263	0.990623	0.32187	0.537886	5.25398	ENSMUSG00000026605	14	Cenpf	protein_coding	ensembl_havana	chr1:189640606-189688086:-
250.241	-0.0737269	1.66276	-0.0443401				ENSMUSG00000024853	9	Sf3b2	protein_coding	ensembl	chr19:5273923-5295455:-
248.877	3.24278	1.73556	1.86844	0.0617011	0.255353	4.5	ENSMUSG00000039473	7	Ubn1	protein_coding	ensembl	chr16:5050068-5086285:+
247.888	1.0507	1.48369	0.708165	0.478843	0.648668	5.25398	ENSMUSG00000063457	14	Rps15	protein_coding	ensembl_havana	chr10:80292453-80294114:+
246.627	4.59114	1.67154	2.74665	0.0060208	0.0834769	5.72755	ENSMUSG00000041736	7	Tspo	protein_coding	ensembl_havana	chr15:83563592-83574203:+
246.13	6.34039	1.95767	3.23874				ENSMUSG00000030726	16	Pold3	protein_coding	ensembl_havana	chr7:100082111-100121565:-
242.576	3.00194	1.36801	2.19439	0.028207	0.189026	4.5	ENSMUSG00000013974	3	Mcemp1	protein_coding	ensembl_havana	chr8:3665754-3669259:+
241.166	-0.647407	1.71979	-0.376445				ENSMUSG00000024190	6	Dusp1	protein_coding	ensembl_havana	chr17:26505590-26508519:-
240.242	-7.97138	2.56117	-3.1124				ENSMUSG00000051180	7	Olfr522	protein_coding	ensembl_havana	chr7:140159999-140164764:-
239.624	5.14021	2.04021	2.51945	0.0117538	0.125684	4.5	ENSMUSG00000027879	9	Sec22b	protein_coding	ensembl_havana	chr3:97901190-97923276:+
239.313	4.78124	2.03375	2.35094				ENSMUSG00000048924	13	Ccdc125	protein_coding	ensembl	chr13:100669481-100697240:+
239.28	1.91815	1.88355	1.01837				ENSMUSG00000090733	6	Rps27	protein_coding	ensembl_havana	chr3:90212522-90213651:-
239.08	-1.19646	1.45656	-0.821425	0.411404	0.64886	4.5	ENSMUSG00000052085	6	Dock8	protein_coding	ensembl	chr19:24999529-25202432:+
238.049	3.35621	1.85994	1.80448				ENSMUSG00000028874	14	Fgr	protein_coding	ensembl_havana	chr4:132974095-133001910:+
236.744	4.27185	1.77545	2.40606				ENSMUSG00000026927	17	Sdccag3	protein_coding	ensembl_havana	chr2:26382802-26389316:-
236.107	1.84467	1.79885	1.02547	0.30514	0.56059	4.5	ENSMUSG00000026701	15	Prdx6	protein_coding	ensembl_havana	chr1:161240112-161251219:-
235.123	-0.905734	1.5787	-0.573721	0.566157	0.711412	5.25398	ENSMUSG00000079426	13	Arpc4	protein_coding	ensembl_havana	chr6:113378115-113390448:+
234.546	-1.7776	1.88028	-0.945391	0.344459	0.595624	4.5	ENSMUSG00000004864	12	Mapk13	protein_coding	ensembl_havana	chr17:28769307-28778698:+
233.877	3.33456	1.58176	2.10813	0.0350195	0.201567	4.5	ENSMUSG00000030148	15	Clec4a2	protein_coding	ensembl_havana	chr6:123106428-123143999:+
233.761	-8.19634	2.1051	-3.89356				ENSMUSG00000021240	5	Abcd4	protein_coding	ensembl	chr12:84602531-84617466:-
233.074	-6.87773	2.02733	-3.39251				ENSMUSG00000015829	13	Tnr	protein_coding	ensembl_havana	chr1:159523769-159931729:+
232.849	2.71829	1.76792	1.53756	0.124155	0.351491	4.5	ENSMUSG00000020349	4	Ppp2ca	protein_coding	ensembl_havana	chr11:52098681-52127778:+
232.594	4.32675	1.90736	2.26844				ENSMUSG00000034116	17	Vav1	protein_coding	ensembl_havana	chr17:57279100-57328031:+
232.269	0.520962	1.80174	0.289143	0.772472	0.796588	5.72755	ENSMUSG00000000078	6	Klf6	protein_coding	ensembl	chr13:5861489-5870393:+
232.242	2.90848	1.95528	1.4875				ENSMUSG00000049339	16	Fam134a	protein_coding	ensembl_havana	chr1:75142778-75147913:+
232.11	1.71598	1.66851	1.02845	0.303738	0.522242	5.25398	ENSMUSG00000031207	16	Msn	protein_coding	ensembl_havana	chrX:96096042-96168552:+
231.722	5.11663	2.0766	2.46395				ENSMUSG00000054428	12	Atpif1	protein_coding	ensembl_havana	chr4:132530555-132533659:-
231.265	1.66846	1.29025	1.29313	0.195966	0.449116	4.5	ENSMUSG00000022961	17	Son	protein_coding	ensembl_havana	chr16:91647506-91679221:+
230.513	5.13597	1.94815	2.63633				ENSMUSG00000040760	10	Appl1	protein_coding	ensembl_havana	chr14:26918988-26971232:-
228.892	0.861756	1.80701	0.476896	0.633436	0.813288	4.5	ENSMUSG00000003970	8	Rpl8	protein_coding	ensembl	chr15:76904071-76906318:+
227.544	3.32586	1.88515	1.76425				ENSMUSG00000016831	11	Tox4	protein_coding	ensembl_havana	chr14:52279146-52296391:+
227.319	3.24165	1.61391	2.00856	0.0445834	0.201567	5.72755	ENSMUSG00000020423	6	Btg2	protein_coding	ensembl_havana	chr1:134075170-134079120:-
227.277	0.275717	1.71308	0.160948	0.872134	0.940343	4.5	ENSMUSG00000021910	15	Nisch	protein_coding	ensembl_havana	chr14:31170930-31216946:-
226.745	0.571974	1.91166	0.299202	0.764786	0.823722	5.25398	ENSMUSG00000043716	13	Rpl7	protein_coding	ensembl_havana	chr1:16101295-16104662:-
226.274	3.51284	1.76725	1.98774	0.0468409	0.214177	5.25398	ENSMUSG00000044894	14	Uqcrq	protein_coding	ensembl_havana	chr11:53427922-53430831:-
224.09	-1.85261	1.93172	-0.959047				ENSMUSG00000031824	15	6430548M08Rik	protein_coding	ensembl_havana	chr8:120114152-120165306:+
223.408	0.210371	1.61823	0.130001	0.896566	0.845943	5.72755	ENSMUSG00000022141	6	Nipbl	protein_coding	ensembl	chr15:8291225-8444463:-
223.296	5.13109	1.8252	2.81124				ENSMUSG00000036944	5	Tmem71	protein_coding	ensembl	chr15:66526212-66561046:-
222.992	-0.543269	2.14036	-0.253821				ENSMUSG00000030921	17	Trim30a	protein_coding	ensembl_havana	chr7:104409025-104465193:-
220.663	0.806685	2.05902	0.391781				ENSMUSG00000030214	6	Plbd1	protein_coding	ensembl_havana	chr6:136612070-136661928:-
220.256	1.25399	1.48793	0.84278	0.399351	0.593054	5.25398	ENSMUSG00000024659	14	Anxa1	protein_coding	ensembl_havana	chr19:20373428-20390944:-
220.138	0.584102	1.71967	0.339659	0.734113	0.810235	5.25398	ENSMUSG00000036181	2	Hist1h1c	protein_coding	ensembl_havana	chr13:23738808-23740367:+
219.924	7.07644	2.26113	3.1296				ENSMUSG00000029627	12	Zkscan14	protein_coding	ensembl_havana	chr5:145194946-145201868:-
219.256	1.54991	1.62889	0.951511	0.341345	0.530393	5.72755	ENSMUSG00000007892	8	Rplp1	protein_coding	ensembl_havana	chr9:61913284-61914542:-
218.592	1.09313	1.43131	0.763727	0.44503	0.600997	5.72755	ENSMUSG00000057322	12	Rpl38	protein_coding	ensembl_havana	chr11:114668524-114672331:+
217.527	5.11608	1.94533	2.62993	0.00854016	0.100582	5.25398	ENSMUSG00000034789	7	Rab24	protein_coding	ensembl	chr13:55319223-55321980:-
216.385	5.74369	1.97213	2.91243				ENSMUSG00000035365	15	Parpbp	protein_coding	ensembl_havana	chr10:88091432-88146941:-
216.078	2.81417	1.81718	1.54865	0.121467	0.319906	5.25398	ENSMUSG00000059518	14	Znhit1	protein_coding	ensembl_havana	chr5:136982164-136988021:-
215.802	5.67075	2.59583	2.18456				ENSMUSG00000015001	17	Oc90	protein_coding	ensembl_havana	chr15:65876053-65912397:-
215.696	0.304074	1.69518	0.179376	0.857643	0.931687	4.5	ENSMUSG00000052435	6	Cebpe	protein_coding	ensembl	chr14:54710363-54712174:-
215.668	3.54985	1.49473	2.37491	0.0175532	0.137516	5.25398	ENSMUSG00000029622	16	Arpc1b	protein_coding	ensembl_havana	chr5:145114215-145130705:+
215.606	3.57832	1.89137	1.89192	0.0585014	0.231336	5.25398	ENSMUSG00000033088	18	Triobp	protein_coding	ensembl_havana	chr15:78947724-79005867:+
215.434	-0.354311	1.72532	-0.20536	0.837291	0.919971	4.5	ENSMUSG00000022584	14	Ly6c2	protein_coding	ensembl_havana	chr15:75108158-75111970:-
215.379	2.3968	1.99598	1.20082	0.229822	0.431986	5.72755	ENSMUSG00000022540	16	Rogdi	protein_coding	ensembl_havana	chr16:5008730-5013553:-
215.028	0.276105	1.49469	0.184724	0.853446	0.859321	5.25398	ENSMUSG00000037270	18	4932438A13Rik	protein_coding	ensembl_havana	chr3:36863104-37053033:+
214.779	1.43996	1.90248	0.756884	0.449119	0.680956	4.5	ENSMUSG00000027639	16	Samhd1	protein_coding	ensembl_havana	chr2:157097533-157135265:-
214.61	3.30445	2.30795	1.43176				ENSMUSG00000022508	5	Bcl6	protein_coding	ensembl_havana	chr16:23965052-23988852:-
213.308	2.46171	1.81426	1.35687				ENSMUSG00000004626	14	Stxbp2	protein_coding	ensembl_havana	chr8:3630955-3643644:+
212.937	5.32561	2.14043	2.48811				ENSMUSG00000022360	7	Atad2	protein_coding	ensembl	chr15:58094047-58135082:-
211.9	1.93939	2.11333	0.917693	0.35878	0.563401	5.25398	ENSMUSG00000037949	8	Ano10	protein_coding	ensembl_havana	chr9:122175874-122294423:-
211.674	-3.00301	2.04482	-1.46859				ENSMUSG00000039232	11	Stx11	protein_coding	ensembl	chr10:12939983-12964259:-
211.547	4.52048	1.73856	2.60013				ENSMUSG00000022197	15	Pdzd2	protein_coding	ensembl_havana	chr15:12359711-12739924:-
211.052	3.47836	1.74249	1.9962	0.0459118	0.205971	5.72755	ENSMUSG00000022582	4	Ly6g	protein_coding	ensembl_havana	chr15:75155240-75159126:+
210.639	2.80398	1.39377	2.0118	0.0442415	0.223775	4.5	ENSMUSG00000026581	14	Sell	protein_coding	ensembl_havana	chr1:164061982-164084181:+
210.588	6.24058	2.07213	3.01168				ENSMUSG00000000561	14	Wdr77	protein_coding	ensembl_havana	chr3:105959369-105970037:+
210.263	-2.25441	1.74574	-1.29138	0.196573	0.449151	4.5	ENSMUSG00000020440	13	Arf5	protein_coding	ensembl_havana	chr6:28423560-28426602:+
209.433	-0.437341	1.68979	-0.258813	0.795779	0.807703	5.72755	ENSMUSG00000052915	14	Msl1	protein_coding	ensembl_havana	chr11:98795516-98807859:+
209.075	-1.51372	1.82875	-0.827736				ENSMUSG00000018927	3	Ccl6	protein_coding	ensembl_havana	chr11:83587882-83593087:-
208.84	2.81021	2.10072	1.33774				ENSMUSG00000030521	11	Mphosph10	protein_coding	ensembl_havana	chr7:64376527-64392268:-
208.717	1.21563	1.52241	0.798488	0.424587	0.584782	5.72755	ENSMUSG00000058717	8	Gm4763	protein_coding	ensembl_havana	chr7:24715023-24726908:-
208.14	1.5136	1.44019	1.05098	0.293268	0.551509	4.5	ENSMUSG00000044783	16	Hjurp	protein_coding	ensembl_havana	chr1:88262471-88277633:-
207.909	2.51448	1.7831	1.41018				ENSMUSG00000003038	15	Hmgn2	protein_coding	ensembl_havana	chr4:133964738-133968650:-
207.065	5.10963	1.65646	3.08467	0.00203781	0.0733632	4.5	ENSMUSG00000019564	12	Arid3a	protein_coding	ensembl_havana	chr10:79927043-79955018:+
206.862	1.65936	1.46879	1.12975	0.258583	0.520952	4.5	ENSMUSG00000062210	13	Tnfaip8	protein_coding	ensembl_havana	chr18:49979427-50107173:+
206.654	-9.75219	2.23958	-4.35447				ENSMUSG00000015882	17	Lcorl	protein_coding	ensembl_havana	chr5:45697181-45857615:-
206.506	3.7388	1.8502	2.02075	0.0433052	0.221866	4.5	ENSMUSG00000040952	16	Rps19	protein_coding	ensembl_havana	chr7:24884371-24889806:+
206.47	1.5193	2.02474	0.75037	0.453032	0.633482	5.25398	ENSMUSG00000030876	7	Mettl9	protein_coding	ensembl_havana	chr7:121034445-121078329:+
206.111	24.2651	3.27043	7.41956				ENSMUSG00000075198	2	Olfr1045	protein_coding	ensembl_havana	chr2:86195910-86203009:-
206.078	3.07731	1.73604	1.7726	0.0762952	0.274744	4.5	ENSMUSG00000033938	5	Ndufb7	protein_coding	ensembl_havana	chr8:83566671-83571626:+
205.498	2.74877	1.4301	1.92209	0.0545943	0.240348	4.5	ENSMUSG00000041836	10	Ptpre	protein_coding	ensembl_havana	chr7:135537481-135686293:+
205.242	4.18748	1.90225	2.20133				ENSMUSG00000070034	13	Sp110	protein_coding	ensembl_havana	chr1:85576899-85598817:-
205.058	-2.42843	1.74493	-1.39171	0.164011	0.408927	4.5	ENSMUSG00000030287	15	Itpr2	protein_coding	ensembl_havana	chr6:146108299-146502223:-
204.517	8.01107	2.54807	3.14398				ENSMUSG00000028030	12	Tbck	protein_coding	ensembl_havana	chr3:132684144-132841688:+
204.476	0.543151	1.7785	0.305398				ENSMUSG00000021094	9	Dhrs7	protein_coding	ensembl	chr12:72650356-72664828:-
204.142	0.0070232	1.92053	0.00365691	0.997082	0.92995	5.25398	ENSMUSG00000005610	17	Eif4g2	protein_coding	ensembl_havana	chr7:111067750-111083030:-
203.737	-0.0631068	1.83058	-0.0344736	0.972499	0.875866	5.72755	ENSMUSG00000045176	3	Borcs6	protein_coding	ensembl_havana	chr11:69059717-69061578:+
203.649	4.45277	2.28637	1.94753				ENSMUSG00000006471	18	Ndor1	protein_coding	ensembl_havana	chr2:25244821-25256022:-
202.902	4.2786	2.06526	2.07171				ENSMUSG00000050786	8	Ccdc126	protein_coding	ensembl_havana	chr6:49319274-49341582:+
202.226	2.94171	1.54165	1.90816				ENSMUSG00000020029	5	Nudt4	protein_coding	ensembl	chr10:95547007-95564167:-
201.846	-0.893075	1.97022	-0.453286				ENSMUSG00000049686	14	Orai1	protein_coding	ensembl_havana	chr5:123015074-123030456:+
201.827	1.61513	1.96255	0.822972				ENSMUSG00000024404	6	Riok3	protein_coding	ensembl	chr18:12128850-12157367:+
201.302	2.52897	1.41728	1.78439	0.0743609	0.271354	4.5	ENSMUSG00000090862	3	Rps13	protein_coding	ensembl_havana	chr7:116331505-116334195:-
200.762	1.44549	1.63499	0.884093	0.376646	0.623773	4.5	ENSMUSG00000062070	12	Pgk1	protein_coding	ensembl_havana	chrX:106187100-106203699:+
200.731	2.63587	1.87555	1.40539				ENSMUSG00000025404	15	R3hdm2	protein_coding	ensembl_havana	chr10:127380327-127499384:+
200.549	4.6964	1.87591	2.50353	0.0122961	0.128904	4.5	ENSMUSG00000037503	12	Fam168b	protein_coding	ensembl_havana	chr1:34813219-34843065:-
199.863	0.432963	1.61107	0.268742	0.788128	0.889955	4.5	ENSMUSG00000052681	7	Rap1b	protein_coding	ensembl	chr10:117814471-117845935:-
199.794	0.876025	1.4047	0.623639	0.532864	0.742384	4.5	ENSMUSG00000022555	11	Dgat1	protein_coding	ensembl_havana	chr15:76502015-76511951:-
199.685	-1.5813	2.33061	-0.678492				ENSMUSG00000039294	14	BC017643	protein_coding	ensembl_havana	chr11:121222588-121229322:-
199.501	3.09374	1.66003	1.86366	0.0623689	0.256224	4.5	ENSMUSG00000024725	12	Ostf1	protein_coding	ensembl_havana	chr19:18579328-18631789:-
198.72	0.947954	1.66617	0.568942	0.569395	0.680011	5.72755	ENSMUSG00000051510	13	Mafg	protein_coding	ensembl_havana	chr11:120625117-120633600:-
198.541	6.16516	2.46798	2.49806				ENSMUSG00000044043	4	Pcdhb14	protein_coding	ensembl_havana	chr18:37447656-37456350:+
198.369	3.13639	1.45145	2.16086	0.0307064	0.194065	4.5	ENSMUSG00000019528	18	Gyg	protein_coding	ensembl_havana	chr3:20122084-20155317:-
197.072	1.43678	2.3545	0.610227				ENSMUSG00000027613	15	Eif6	protein_coding	ensembl_havana	chr2:155819832-155826925:-
196.792	2.5119	1.64922	1.52308	0.127738	0.326705	5.25398	ENSMUSG00000050989	9	Selenon	protein_coding	ensembl_havana	chr4:134537892-134552166:-
195.497	5.27368	1.82663	2.88711	0.00388801	0.080195	4.5	ENSMUSG00000033933	13	Vhl	protein_coding	ensembl_havana	chr6:113623959-113631633:+
195.258	1.4563	1.57423	0.925081	0.354924	0.605475	4.5	ENSMUSG00000022895	14	Ets2	protein_coding	ensembl_havana	chr16:95702075-95721051:+
195.22	4.08069	2.08675	1.95553				ENSMUSG00000034453	8	Polr3b	protein_coding	ensembl_havana	chr10:84622292-84727178:+
195.208	4.64417	1.88629	2.46207				ENSMUSG00000040242	14	Fgfr1op2	protein_coding	ensembl_havana	chr6:146577203-146599198:+
193.999	-2.91272	2.27021	-1.28302				ENSMUSG00000047789	4	Slc38a9	protein_coding	ensembl	chr13:112660766-112738743:+
193.997	0.60385	1.62465	0.37168	0.710131	0.848192	4.5	ENSMUSG00000000628	10	Hk2	protein_coding	ensembl_havana	chr6:82725025-82774454:-
193.27	5.45691	1.82036	2.99771	0.00272015	0.0763113	4.5	ENSMUSG00000027852	14	Nras	protein_coding	ensembl_havana	chr3:103058285-103067914:+
193.195	-2.05506	1.83432	-1.12034	0.262568	0.525074	4.5	ENSMUSG00000003039	9	Fam32a	protein_coding	ensembl_havana	chr8:72219730-72224418:+
193.029	2.04745	2.03897	1.00416	0.315303	0.531675	5.25398	ENSMUSG00000054091	9	1810037I17Rik	protein_coding	ensembl_havana	chr3:122924203-122926184:+
192.531	-0.119518	2.2009	-0.0543039				ENSMUSG00000044715	6	Gskip	protein_coding	ensembl	chr12:105685352-105703047:+
191.982	1.21595	1.64191	0.740569	0.458955	0.689614	4.5	ENSMUSG00000034595	17	Ppp1r18	protein_coding	ensembl_havana	chr17:35865593-35875596:+
191.639	-8.41389	2.07179	-4.06116				ENSMUSG00000010376	14	Nedd8	protein_coding	ensembl	chr14:55662265-55671906:-
191.573	4.98003	1.93217	2.57743	0.00995376	0.115246	4.5	ENSMUSG00000055639	16	Dach1	protein_coding	ensembl_havana	chr14:97786853-98169765:-
190.727	4.68685	1.69264	2.76896	0.00562359	0.0884785	4.5	ENSMUSG00000027306	15	Nusap1	protein_coding	ensembl_havana	chr2:119618298-119651244:+
190.259	5.84091	2.16844	2.69359				ENSMUSG00000020564	16	Atxn7l1	protein_coding	ensembl_havana	chr12:33147693-33375659:+
190.209	2.98525	1.61895	1.84394	0.0651912	0.243625	5.25398	ENSMUSG00000031584	16	Gsr	protein_coding	ensembl_havana	chr8:33652523-33698163:+
189.841	5.74425	1.72095	3.33784	0.000844318	0.0645746	4.5	ENSMUSG00000019826	11	Zbtb24	protein_coding	ensembl_havana	chr10:41450383-41465574:+
189.126	4.31575	1.9175	2.25072				ENSMUSG00000045078	12	Rnf216	protein_coding	ensembl_havana	chr5:142990893-143112994:-
188.686	1.45977	2.12608	0.686603				ENSMUSG00000029311	16	Hsd17b11	protein_coding	ensembl_havana	chr5:103989762-104021919:-
188.6	1.3603	1.61628	0.841621	0.4	0.643331	4.5	ENSMUSG00000074656	12	Eif2s2	protein_coding	ensembl_havana	chr2:154871410-154892935:-
187.84	4.86861	1.968	2.47389				ENSMUSG00000011884	13	Gltp	protein_coding	ensembl_havana	chr5:114669398-114690984:-
187.521	-2.77754	1.90138	-1.4608				ENSMUSG00000010608	15	Rbm25	protein_coding	ensembl_havana	chr12:83631236-83683123:+
187.296	2.84329	1.68867	1.68374	0.0922312	0.299073	4.5	ENSMUSG00000034708	11	Grn	protein_coding	ensembl_havana	chr11:102430315-102437048:+
187.107	-1.37518	1.78338	-0.771109	0.440642	0.62438	5.25398	ENSMUSG00000026832	12	Cytip	protein_coding	ensembl_havana	chr2:58129137-58195532:-
186.825	2.4109	2.0078	1.20077				ENSMUSG00000014668	15	Chfr	protein_coding	ensembl_havana	chr5:110135842-110171972:+
186.637	2.08414	1.89012	1.10265	0.27018	0.531675	4.5	ENSMUSG00000014294	4	Ndufa2	protein_coding	ensembl_havana	chr18:36742332-36744557:-
186.364	3.10428	2.21116	1.40391				ENSMUSG00000031751	14	Amfr	protein_coding	ensembl_havana	chr8:93971588-94012842:-
185.221	6.96522	2.36218	2.94864				ENSMUSG00000022575	4	Gsdmd	protein_coding	ensembl	chr15:75862339-75867404:+
185.2	-1.88042	1.93144	-0.973587	0.330262	0.583134	4.5	ENSMUSG00000024360	7	Etf1	protein_coding	ensembl_havana	chr18:34902785-34932007:-
184.988	4.71406	1.81091	2.60314	0.0092374	0.10301	5.25398	ENSMUSG00000096472	2	Cdkn2d	protein_coding	ensembl_havana	chr9:21288410-21291407:-
184.933	0.217087	1.63843	0.132497				ENSMUSG00000020846	6	Rflnb	protein_coding	ensembl_havana	chr11:76019194-76027782:-
184.878	-2.4245	1.60564	-1.50999	0.131046	0.318757	5.72755	ENSMUSG00000056501	3	Cebpb	protein_coding	ensembl_havana	chr2:167688915-167690418:+
184.736	0.736346	1.73327	0.42483	0.67096	0.828202	4.5	ENSMUSG00000056091	12	St3gal5	protein_coding	ensembl_havana	chr6:72097592-72154571:+
184.413	0.0873399	1.65549	0.0527579				ENSMUSG00000040297	12	Suco	protein_coding	ensembl_havana	chr1:161816114-161876682:-
184.323	8.8709	2.65716	3.33849				ENSMUSG00000037994	14	Slc9b2	protein_coding	ensembl_havana	chr3:135307700-135345387:+
183.809	7.29041	2.23204	3.26626				ENSMUSG00000071662	3	Polr2g	protein_coding	ensembl	chr19:8793129-8798557:-
183.759	0.468929	1.58683	0.295513	0.767602	0.793239	5.72755	ENSMUSG00000049313	8	Sorl1	protein_coding	ensembl_havana	chr9:41964720-42124297:-
183.552	5.19002	1.85298	2.8009	0.00509604	0.0806986	5.72755	ENSMUSG00000041891	15	Lman1	protein_coding	ensembl_havana	chr18:65980754-66022580:-
183.482	-1.29946	1.83746	-0.707204	0.479439	0.648668	5.25398	ENSMUSG00000084957	2	Bbip1	protein_coding	ensembl	chr19:53929677-53944627:-
183.14	2.24064	1.81258	1.23616	0.216399	0.470485	4.5	ENSMUSG00000045679	13	Pqlc3	protein_coding	ensembl_havana	chr12:16988648-17000408:-
183.117	5.0201	2.02236	2.4823	0.0130538	0.131534	4.5	ENSMUSG00000032846	9	Zswim6	protein_coding	ensembl	chr13:107724618-107890064:-
182.993	2.2477	1.50016	1.49831	0.134053	0.333978	5.25398	ENSMUSG00000003814	8	Calr	protein_coding	ensembl_havana	chr8:84841850-84846934:-
182.746	6.84098	2.10445	3.25072	0.00115114	0.066033	4.5	ENSMUSG00000017664	16	Slc35c2	protein_coding	ensembl_havana	chr2:165276554-165287869:-
182.679	-3.62582	1.73244	-2.0929				ENSMUSG00000048271	14	Rbm33	protein_coding	ensembl_havana	chr5:28317121-28419239:+
182.577	1.36633	1.88997	0.722936	0.469719	0.644213	5.25398	ENSMUSG00000064368	1	mt-Nd6	protein_coding	insdc	chrM:13552-14070:-
182.179	0.239605	1.7334	0.138228	0.89006	0.875135	5.25398	ENSMUSG00000028228	5	Cpne3	protein_coding	ensembl_havana	chr4:19519254-19570108:-
181.845	7.82865	2.5956	3.01612				ENSMUSG00000030867	7	Plk1	protein_coding	ensembl_havana	chr7:122159439-122169873:+
181.757	5.3514	1.93976	2.75879	0.00580155	0.0821579	5.72755	ENSMUSG00000021486	6	Prelid1	protein_coding	ensembl	chr13:55322055-55325271:+
181.62	8.16502	2.75636	2.96225				ENSMUSG00000031657	16	Heatr3	protein_coding	ensembl_havana	chr8:88137855-88172027:+
181.279	0.647047	1.58319	0.408698	0.682761	0.831473	4.5	ENSMUSG00000005533	10	Igf1r	protein_coding	ensembl_havana	chr7:67952827-68233668:+
181.178	1.67209	1.65893	1.00793	0.313487	0.530393	5.25398	ENSMUSG00000026626	11	Ppp2r5a	protein_coding	ensembl_havana	chr1:191351975-191403272:-
181.162	1.6147	1.54656	1.04406	0.296458	0.55491	4.5	ENSMUSG00000073411	11	H2-D1	protein_coding	ensembl_havana	chr17:35262730-35267499:+
180.949	-1.02847	1.91332	-0.537534	0.590899	0.785338	4.5	ENSMUSG00000031818	12	Cox4i1	protein_coding	ensembl_havana	chr8:120668222-120674207:+
180.925	7.58351	2.58031	2.939				ENSMUSG00000000902	13	Smarcb1	protein_coding	ensembl_havana	chr10:75896769-75921617:-
180.828	0.904126	1.81381	0.498469	0.618154	0.803738	4.5	ENSMUSG00000019832	3	Rab32	protein_coding	ensembl_havana	chr10:10545011-10558233:-
180.275	2.92069	2.01084	1.45247	0.146371	0.385202	4.5	ENSMUSG00000022500	14	Litaf	protein_coding	ensembl_havana	chr16:10959275-11066157:-
180.146	4.88677	1.90043	2.5714				ENSMUSG00000020048	13	Hsp90b1	protein_coding	ensembl_havana	chr10:86690209-86705509:-
179.425	5.5484	1.71816	3.22927	0.00124105	0.066838	4.5	ENSMUSG00000031532	6	Saraf	protein_coding	ensembl_havana	chr8:34154575-34170821:+
178.873	4.29706	1.98439	2.16544				ENSMUSG00000066979	6	Bub3	protein_coding	ensembl_havana	chr7:131560222-131571895:+
178.585	2.41204	1.47633	1.63381	0.1023	0.317954	4.5	ENSMUSG00000022285	16	Ywhaz	protein_coding	ensembl_havana	chr15:36770770-36794547:-
178.278	1.48448	1.51873	0.977449	0.328347	0.580949	4.5	ENSMUSG00000026728	9	Vim	protein_coding	ensembl_havana	chr2:13573927-13582826:+
177.973	-8.33013	2.16516	-3.84736	0.000119399	0.0474081	4.5	ENSMUSG00000039852	16	Rere	protein_coding	ensembl_havana	chr4:150281646-150621966:+
177.914	5.09077	1.79173	2.84126	0.00449362	0.0821579	4.5	ENSMUSG00000045382	6	Cxcr4	protein_coding	ensembl_havana	chr1:128588199-128592293:-
177.58	8.51252	2.46555	3.45259	0.000555234	0.0631664	5.25398	ENSMUSG00000109901	1	Chmp1b	protein_coding	havana	chr18:67203531-67207880:+
177.438	2.93167	1.84982	1.58484	0.113002	0.29194	5.72755	ENSMUSG00000023990	18	Tfeb	protein_coding	ensembl_havana	chr17:47737030-47792419:+
177.38	6.50851	2.33246	2.7904				ENSMUSG00000021179	7	Nrde2	protein_coding	ensembl	chr12:100125452-100159653:-
177.018	2.97823	1.58069	1.88413	0.059547	0.228278	5.72755	ENSMUSG00000052146	15	Rps10	protein_coding	ensembl_havana	chr17:27630422-27636629:-
176.93	4.10067	1.89589	2.16292				ENSMUSG00000033931	9	Rbm34	protein_coding	ensembl_havana	chr8:126947172-126971071:-
176.692	3.18262	1.61442	1.97137	0.0486813	0.230796	4.5	ENSMUSG00000030830	18	Itgal	protein_coding	ensembl_havana	chr7:127296260-127335138:+
176.224	1.34896	1.66588	0.809756	0.41808	0.580949	5.72755	ENSMUSG00000018501	17	Ncor1	protein_coding	ensembl_havana	chr11:62316426-62458541:-
175.82	-0.473161	1.65331	-0.28619	0.774732	0.797409	5.72755	ENSMUSG00000038147	13	Cd84	protein_coding	ensembl_havana	chr1:171839697-171890718:+
175.551	-5.98704	2.25529	-2.65467				ENSMUSG00000021619	5	Atg10	protein_coding	ensembl	chr13:90935349-91223987:-
175.35	5.62767	2.08053	2.70491				ENSMUSG00000032412	8	Atp1b3	protein_coding	ensembl_havana	chr9:96332655-96364442:-
174.969	1.79107	1.99707	0.896847	0.3698	0.572084	5.25398	ENSMUSG00000031825	16	Crispld2	protein_coding	ensembl_havana	chr8:119992438-120052793:+
174.379	1.27124	1.93723	0.656211	0.511688	0.644213	5.72755	ENSMUSG00000056737	14	Capg	protein_coding	ensembl_havana	chr6:72544391-72562983:+
174.265	4.50237	2.27836	1.97615	0.0481379	0.230433	4.5	ENSMUSG00000022300	9	Dcaf13	protein_coding	ensembl_havana	chr15:39112865-39146856:+
174.01	-3.77161	2.49815	-1.50976				ENSMUSG00000037204	6	Atg101	protein_coding	ensembl	chr15:101284301-101290934:+
173.949	0.328741	1.52217	0.215968	0.829012	0.848192	5.25398	ENSMUSG00000020120	15	Plek	protein_coding	ensembl_havana	chr11:16971206-17052381:-
173.602	0.350792	1.48992	0.235444	0.813864	0.905972	4.5	ENSMUSG00000042406	7	Atf4	protein_coding	ensembl	chr15:80255184-80257540:+
173.237	4.51697	1.64111	2.75239				ENSMUSG00000039542	16	Ncam1	protein_coding	ensembl_havana	chr9:49502136-49798925:-
173.004	-2.21533	1.75784	-1.26026	0.207577	0.428436	5.25398	ENSMUSG00000024639	5	Gnaq	protein_coding	ensembl_havana	chr19:16132831-16387463:+
172.924	-0.796128	1.64107	-0.485127	0.627586	0.809375	4.5	ENSMUSG00000030180	15	Kdm5a	protein_coding	ensembl_havana	chr6:120364124-120444574:+
172.746	0.00976511	1.60186	0.00609609	0.995136	1	4.5	ENSMUSG00000033499	13	Larp4b	protein_coding	ensembl_havana	chr13:9093881-9174451:+
171.154	0.282178	1.7345	0.162685	0.870766	0.939972	4.5	ENSMUSG00000027630	13	Tbl1xr1	protein_coding	ensembl_havana	chr3:22076652-22216594:+
170.621	-10.3977	2.40601	-4.32156	1.54933e-05	0.0172804	4.5	ENSMUSG00000073795	11	6430531B16Rik	protein_coding	ensembl_havana	chr7:139972303-139978755:-
170.602	0.658558	2.30952	0.285149	0.77553	0.797797	5.72755	ENSMUSG00000070697	4	Utp3	protein_coding	ensembl_havana	chr5:88554462-88556090:+
170.142	-0.120141	1.73459	-0.0692619	0.944781	0.981054	4.5	ENSMUSG00000037266	18	Rsrp1	protein_coding	ensembl_havana	chr4:134923592-134927671:+
169.693	2.4511	1.68404	1.45548	0.145535	0.384916	4.5	ENSMUSG00000030695	14	Aldoa	protein_coding	ensembl_havana	chr7:126795234-126809108:-
169.184	4.63567	2.02237	2.29219				ENSMUSG00000002608	8	Ccdc97	protein_coding	ensembl_havana	chr7:25711106-25719088:-
168.668	-8.03629	2.39438	-3.35631				ENSMUSG00000079620	13	Muc4	protein_coding	ensembl_havana	chr16:32735886-32782391:+
168.096	1.17167	1.64578	0.711925	0.476511	0.648668	5.25398	ENSMUSG00000015143	14	Actn1	protein_coding	ensembl	chr12:80167542-80260371:-
168.066	-0.631729	1.87886	-0.33623	0.736697	0.86159	4.5	ENSMUSG00000034312	14	Iqsec1	protein_coding	ensembl_havana	chr6:90656088-90988685:-
168.049	3.54801	2.03421	1.74417				ENSMUSG00000027660	16	Skil	protein_coding	ensembl_havana	chr3:31095058-31122577:+
167.74	0.902047	1.8886	0.477627				ENSMUSG00000056342	16	Usp34	protein_coding	ensembl_havana	chr11:23306895-23490560:+
167.629	-0.576	1.68077	-0.3427	0.731824	0.859833	4.5	ENSMUSG00000062604	11	Srpk2	protein_coding	ensembl_havana	chr5:23503264-23684617:-
167.46	-2.53437	1.83952	-1.37773	0.168285	0.383102	5.25398	ENSMUSG00000001158	13	Snrnp27	protein_coding	ensembl_havana	chr6:86675151-86684522:-
166.2	1.26595	1.60794	0.787312	0.431099	0.664095	4.5	ENSMUSG00000038633	5	Degs1	protein_coding	ensembl_havana	chr1:182275772-182282804:-
165.791	23.9631	2.81774	8.50438				ENSMUSG00000028137	9	Celf3	protein_coding	ensembl_havana	chr3:94478295-94492198:+
165.606	1.74752	2.26734	0.770735				ENSMUSG00000056413	16	Adap1	protein_coding	ensembl_havana	chr5:139271876-139325622:-
165.572	-0.588546	1.88326	-0.312514	0.75465	0.821652	5.25398	ENSMUSG00000009907	17	Vps4b	protein_coding	ensembl_havana	chr1:106764071-106796728:-
165.458	0.233166	2.1071	0.110657				ENSMUSG00000033916	5	Chmp2a	protein_coding	ensembl_havana	chr7:13032010-13034807:-
165.275	-0.378293	1.54038	-0.245585	0.806004	0.901198	4.5	ENSMUSG00000034868	8	Myl12b	protein_coding	ensembl_havana	chr17:70973920-70990787:-
165.26	6.21946	2.23514	2.78258				ENSMUSG00000027331	15	Knstrn	protein_coding	ensembl_havana	chr2:118814003-118853957:+
164.808	6.90303	2.3976	2.87914				ENSMUSG00000034853	16	Acot11	protein_coding	ensembl_havana	chr4:106744555-106804998:-
164.354	3.34842	1.77478	1.88667	0.0592053	0.250083	4.5	ENSMUSG00000064254	6	Ethe1	protein_coding	ensembl_havana	chr7:24587543-24608925:+
164.31	4.37828	1.41314	3.09827	0.00194653	0.0727417	4.5	ENSMUSG00000020530	14	Ggnbp2	protein_coding	ensembl_havana	chr11:84832361-84870817:-
163.935	-0.631495	1.47482	-0.428184	0.668517	0.82719	4.5	ENSMUSG00000025935	10	Tram1	protein_coding	ensembl_havana	chr1:13564698-13589910:-
163.876	5.23624	1.83853	2.84806	0.00439866	0.0821579	4.5	ENSMUSG00000028016	9	Ints12	protein_coding	ensembl_havana	chr3:133091840-133110988:+
163.187	0.933637	1.74902	0.533806	0.593476	0.729696	5.25398	ENSMUSG00000002458	13	Rgs19	protein_coding	ensembl_havana	chr2:181688419-181693977:-
162.869	-0.434921	1.84236	-0.236068				ENSMUSG00000047735	14	Samd9l	protein_coding	ensembl_havana	chr6:3372257-3399572:-
162.723	1.14563	1.3364	0.857251	0.391306	0.636577	4.5	ENSMUSG00000002107	18	Celf2	protein_coding	ensembl_havana	chr2:6539694-7509563:-
162.546	-0.960412	1.9931	-0.481868				ENSMUSG00000048865	16	Arhgap30	protein_coding	ensembl_havana	chr1:171388954-171410298:+
162.497	-2.16424	1.79385	-1.20648				ENSMUSG00000028525	16	Pde4b	protein_coding	ensembl_havana	chr4:102087543-102607259:+
162.349	0.0501635	1.97676	0.0253766	0.979755	1	4.5	ENSMUSG00000060470	7	Adgrg3	protein_coding	ensembl_havana	chr8:95017692-95045250:+
161.743	2.60131	1.50679	1.72639	0.0842777	0.286008	4.5	ENSMUSG00000047675	15	Rps8	protein_coding	ensembl_havana	chr4:117153827-117156243:-
161.639	1.25607	1.37543	0.913222	0.361126	0.611192	4.5	ENSMUSG00000042599	8	Kdm7a	protein_coding	ensembl_havana	chr6:39136623-39206789:-
161.454	-0.612566	2.42964	-0.252122				ENSMUSG00000021290	5	2010107E04Rik	protein_coding	ensembl	chr12:111961376-111966977:-
161.441	1.3334	1.7929	0.743711	0.457052	0.688056	4.5	ENSMUSG00000024661	6	Fth1	protein_coding	ensembl	chr19:9982703-9985092:+
161.119	0.882955	1.73136	0.509977	0.610068	0.737299	5.25398	ENSMUSG00000045482	16	Trrap	protein_coding	ensembl_havana	chr5:144767732-144859778:+
160.949	2.67298	1.63847	1.63138	0.102809	0.318603	4.5	ENSMUSG00000042364	10	Snx18	protein_coding	ensembl	chr13:113592180-113618564:-
159.367	-1.96735	1.55519	-1.26502	0.205863	0.459209	4.5	ENSMUSG00000023764	18	Sfi1	protein_coding	ensembl_havana	chr11:3131850-3193463:-
159.157	3.76614	1.63982	2.29668	0.0216368	0.155728	5.25398	ENSMUSG00000042323	16	Pbrm1	protein_coding	ensembl_havana	chr14:31019138-31121592:+
158.946	5.60843	2.09848	2.67262				ENSMUSG00000075227	6	Znhit2	protein_coding	ensembl_havana	chr19:6061192-6062472:+
158.744	3.85709	1.81909	2.12034	0.0339772	0.200607	4.5	ENSMUSG00000001105	15	Ift20	protein_coding	ensembl_havana	chr11:78536361-78541737:+
158.737	-8.02857	2.32227	-3.4572				ENSMUSG00000060036	13	Rpl3	protein_coding	ensembl_havana	chr15:80077794-80091868:-
158.341	4.05321	1.73089	2.34168				ENSMUSG00000025104	13	Hdgfrp3	protein_coding	ensembl_havana	chr7:81881251-81934473:-
158.219	-0.846482	1.48183	-0.571243	0.567835	0.768184	4.5	ENSMUSG00000050552	8	Lamtor4	protein_coding	ensembl_havana	chr5:138255482-138259398:+
157.734	-0.553729	1.65153	-0.335283				ENSMUSG00000037095	7	Lrg1	protein_coding	ensembl	chr17:56119680-56121946:-
157.558	5.63556	1.81785	3.10013	0.00193438	0.0727417	4.5	ENSMUSG00000026743	16	Mllt10	protein_coding	ensembl_havana	chr2:18055237-18212388:+
157.41	-1.50797	1.70456	-0.884668	0.376336	0.576823	5.25398	ENSMUSG00000038712	16	Fam63a	protein_coding	ensembl_havana	chr3:95281345-95296166:+
157.068	-3.61988	1.7234	-2.10044				ENSMUSG00000026313	16	Hdac4	protein_coding	ensembl_havana	chr1:91928779-92195699:-
157.013	2.07911	1.58194	1.31428	0.188753	0.388026	5.72755	ENSMUSG00000020642	12	Rnf144a	protein_coding	ensembl	chr12:26306797-26415256:-
156.945	1.33012	1.46613	0.90723	0.364285	0.567026	5.25398	ENSMUSG00000034786	17	Gpsm3	protein_coding	ensembl_havana	chr17:34589806-34591754:+
156.915	3.33754	1.98517	1.68123	0.0927173	0.299427	4.5	ENSMUSG00000061104	5	Sap18b	protein_coding	ensembl_havana	chr8:95825346-95826134:+
156.396	5.081	1.88808	2.69109	0.00712193	0.093043	5.25398	ENSMUSG00000059291	15	Rpl11	protein_coding	ensembl_havana	chr4:136028265-136053428:-
156.195	-0.519755	1.58967	-0.326957	0.7437	0.864768	4.5	ENSMUSG00000002957	11	Ap2a2	protein_coding	ensembl_havana	chr7:141562173-141633011:+
156.194	-9.64379	2.12686	-4.53429	5.77971e-06	0.0172804	4.5	ENSMUSG00000034211	14	Mrps17	protein_coding	ensembl_havana	chr5:129715497-129722556:+
156.007	5.5662	2.09891	2.65195				ENSMUSG00000063568	11	Jazf1	protein_coding	ensembl_havana	chr6:52768797-53068631:-
155.986	8.8922	2.35436	3.7769				ENSMUSG00000035329	7	Fbxo33	protein_coding	ensembl_havana	chr12:59200655-59219725:-
155.074	-0.152164	1.58916	-0.095751	0.923718	0.969003	4.5	ENSMUSG00000017778	14	Cox7c	protein_coding	ensembl_havana	chr13:86044816-86046904:-
154.869	5.12168	1.73796	2.94694	0.00320932	0.0763113	5.72755	ENSMUSG00000024570	6	Rbfa	protein_coding	ensembl	chr18:80192265-80200658:-
154.644	0.736058	1.80894	0.406901				ENSMUSG00000025795	7	Rassf3	protein_coding	ensembl	chr10:121410350-121476250:-
154.547	3.55548	1.96509	1.80932				ENSMUSG00000002257	7	Def6	protein_coding	ensembl_havana	chr17:28207778-28228608:+
154.407	1.40545	1.55602	0.903235	0.366401	0.615064	4.5	ENSMUSG00000030816	8	Rnf40	protein_coding	ensembl_havana	chr7:127588767-127604799:+
154.323	2.0307	1.64086	1.23759	0.215869	0.469654	4.5	ENSMUSG00000024006	16	Stk38	protein_coding	ensembl_havana	chr17:28970885-29007945:-
154.232	-0.0739672	1.49014	-0.0496377	0.960411	0.988879	4.5	ENSMUSG00000026457	14	Adipor1	protein_coding	ensembl_havana	chr1:134415378-134433351:+
154.147	1.44412	1.75477	0.822968	0.410526	0.648668	4.5	ENSMUSG00000032239	10	Rp9	protein_coding	ensembl_havana	chr9:22411047-22469743:-
154.106	0.655301	1.98811	0.329609	0.741695	0.78069	5.72755	ENSMUSG00000032322	14	Pstpip1	protein_coding	ensembl_havana	chr9:56089962-56128888:+
153.946	1.2798	1.61217	0.793835	0.427291	0.661436	4.5	ENSMUSG00000027479	14	Mapre1	protein_coding	ensembl_havana	chr2:153741274-153773310:+
153.528	-1.41616	1.91075	-0.741157	0.458598	0.689405	4.5	ENSMUSG00000020863	15	Luc7l3	protein_coding	ensembl_havana	chr11:94287890-94321988:-
153.336	3.07475	1.74549	1.76154				ENSMUSG00000022807	8	Osbpl11	protein_coding	ensembl_havana	chr16:33185071-33243311:+
153.255	3.93684	2.14534	1.83506				ENSMUSG00000034300	16	Fam53c	protein_coding	ensembl	chr18:34758906-34773760:+
153.216	1.33878	1.9491	0.686873	0.492163	0.632476	5.72755	ENSMUSG00000084786	9	Ubl5	protein_coding	ensembl_havana	chr9:20642878-20647140:+
152.908	1.82209	2.3286	0.782485				ENSMUSG00000063894	14	Zkscan8	protein_coding	ensembl_havana	chr13:21513222-21531120:-
152.841	5.9002	2.43177	2.4263				ENSMUSG00000024065	7	Ehd3	protein_coding	ensembl_havana	chr17:73804841-73832093:+
152.772	1.59284	2.20237	0.723236				ENSMUSG00000026393	10	Nek7	protein_coding	ensembl_havana	chr1:138482875-138620141:-
152.601	4.36408	1.78192	2.44909				ENSMUSG00000002413	15	Braf	protein_coding	ensembl_havana	chr6:39603237-39725463:-
152.505	0.910503	2.07785	0.438194				ENSMUSG00000047921	15	Trappc9	protein_coding	ensembl	chr15:72589621-73061204:-
152.201	4.33964	1.99813	2.17185				ENSMUSG00000041313	14	Slc7a1	protein_coding	ensembl_havana	chr5:148327410-148399904:-
151.948	2.33065	1.82247	1.27884	0.200953	0.400546	5.72755	ENSMUSG00000036111	8	Lmo1	protein_coding	ensembl_havana	chr7:109138572-109175207:-
151.914	2.74704	1.78813	1.53626	0.124473	0.352077	4.5	ENSMUSG00000021264	11	Yy1	protein_coding	ensembl_havana	chr12:108792973-108816632:+
151.772	6.41379	2.57731	2.48856				ENSMUSG00000025370	6	Cdh9	protein_coding	ensembl_havana	chr15:16778101-16857094:+
151.722	-2.90514	1.89737	-1.53114				ENSMUSG00000008859	7	Rala	protein_coding	ensembl_havana	chr13:17880575-17944239:-
151.695	2.13272	1.59659	1.3358	0.181614	0.433627	4.5	ENSMUSG00000008683	16	Rps15a	protein_coding	ensembl_havana	chr7:118104372-118116188:-
150.79	-0.411577	1.67612	-0.245553	0.806028	0.901198	4.5	ENSMUSG00000011960	12	Ccnt1	protein_coding	ensembl_havana	chr15:98538689-98570923:-
150.567	6.64851	2.07968	3.1969				ENSMUSG00000079083	3	Jrkl	protein_coding	ensembl_havana	chr9:13242607-13245829:-
150.147	-7.90878	2.17295	-3.63965				ENSMUSG00000021271	4	Zfp839	protein_coding	ensembl	chr12:110850279-110869998:+
149.324	2.44423	1.89059	1.29284				ENSMUSG00000091896	7	Ube2d2a	protein_coding	ensembl	chr18:35771559-35807172:+
149.055	5.42657	2.04253	2.65679				ENSMUSG00000051695	6	Pcbp1	protein_coding	ensembl_havana	chr6:86524492-86526321:-
148.982	3.40203	2.15145	1.58127				ENSMUSG00000053907	10	Mat2a	protein_coding	ensembl_havana	chr6:72432799-72439558:-
148.949	3.07347	1.694	1.81432	0.069628	0.240348	5.72755	ENSMUSG00000024942	16	Capn1	protein_coding	ensembl	chr19:5988546-6015825:-
148.645	23.8086	2.62733	9.06189				ENSMUSG00000015879	8	Fam184b	protein_coding	ensembl_havana	chr5:45529705-45639614:-
148.548	3.53658	1.54611	2.28741	0.0221718	0.170115	4.5	ENSMUSG00000034940	15	Synrg	protein_coding	ensembl_havana	chr11:83964428-84044578:+
148.464	-3.42692	2.24583	-1.5259	0.127034	0.314416	5.72755	ENSMUSG00000033943	15	Mga	protein_coding	ensembl_havana	chr2:119897228-119969581:+
148.285	0.0797429	1.82531	0.0436874	0.965154	0.913639	5.25398	ENSMUSG00000030126	17	Tmcc1	protein_coding	ensembl_havana	chr6:116018611-116193486:-
148.101	1.1556	2.20781	0.523414	0.600686	0.792378	4.5	ENSMUSG00000075595	9	Zfp652	protein_coding	ensembl_havana	chr11:95712673-95835115:+
147.773	-2.29914	2.94261	-0.781328				ENSMUSG00000040121	5	Rep15	protein_coding	ensembl_havana	chr6:147032584-147034245:+
147.516	0.211232	1.69666	0.124498	0.900921	0.84767	5.72755	ENSMUSG00000004668	14	Abca13	protein_coding	ensembl_havana	chr11:9191942-9684259:+
147.098	0.605578	1.72988	0.35007	0.726286	0.855907	4.5	ENSMUSG00000042524	13	Sun2	protein_coding	ensembl_havana	chr15:79724070-79742536:-
146.492	0.87575	1.93464	0.452668	0.650788	0.760626	5.25398	ENSMUSG00000040747	9	Cd53	protein_coding	ensembl_havana	chr3:106759921-106790149:-
146.481	1.85161	1.39994	1.32264	0.185956	0.438243	4.5	ENSMUSG00000037553	14	Zdhhc18	protein_coding	ensembl_havana	chr4:133605299-133650154:-
146.472	4.28174	1.75225	2.44356	0.014543	0.134882	4.5	ENSMUSG00000022789	14	Dnm1l	protein_coding	ensembl	chr16:16312235-16359030:-
145.989	-4.36922	2.46551	-1.77213				ENSMUSG00000064293	14	Cntn4	protein_coding	ensembl_havana	chr6:105677660-106699310:+
145.879	6.45108	1.80509	3.57383	0.000351803	0.0580557	4.5	ENSMUSG00000025967	16	Eef1b2	protein_coding	ensembl_havana	chr1:63176825-63180486:+
145.337	2.18184	1.7531	1.24456	0.213292	0.412638	5.72755	ENSMUSG00000034801	13	Sos2	protein_coding	ensembl_havana	chr12:69583762-69681852:-
144.971	1.81994	1.90127	0.957221	0.338456	0.549405	5.25398	ENSMUSG00000018965	11	Ywhah	protein_coding	ensembl_havana	chr5:33018816-33027966:+
144.785	7.14105	2.86237	2.4948				ENSMUSG00000024381	15	Bin1	protein_coding	ensembl	chr18:32377217-32435736:+
144.645	4.3345	2.43964	1.77669				ENSMUSG00000032002	10	Dcun1d5	protein_coding	ensembl_havana	chr9:7184520-7208205:+
144.619	-0.940538	1.64773	-0.570808	0.56813	0.680011	5.72755	ENSMUSG00000024976	13	Shoc2	protein_coding	ensembl	chr19:53944306-54033268:+
144.136	-6.41256	2.74938	-2.33237				ENSMUSG00000028409	11	Smu1	protein_coding	ensembl_havana	chr4:40736542-40757923:-
144.048	0.890339	1.64228	0.542135	0.587726	0.78395	4.5	ENSMUSG00000025982	13	Sf3b1	protein_coding	ensembl_havana	chr1:54985169-55027481:-
144.042	4.88485	2.0154	2.42376				ENSMUSG00000029439	14	Sfswap	protein_coding	ensembl_havana	chr5:129501221-129571384:+
143.913	4.24907	2.05405	2.06863				ENSMUSG00000078771	10	Evi2a	protein_coding	ensembl_havana	chr11:79526560-79530609:-
143.804	0.361241	1.38075	0.261627	0.793609	0.89392	4.5	ENSMUSG00000050621	7	Rps27rt	protein_coding	ensembl_havana	chr9:114982366-114982739:-
143.658	0.355832	2.52749	0.140785				ENSMUSG00000026809	15	Spaca9	protein_coding	ensembl_havana	chr2:28692080-28699727:-
143.426	0.523769	2.09677	0.249798	0.802744	0.899787	4.5	ENSMUSG00000030654	9	Arl6ip1	protein_coding	ensembl_havana	chr7:118118891-118129662:-
143.424	-0.12558	1.78954	-0.0701746	0.944055	0.981054	4.5	ENSMUSG00000024937	14	Ehbp1l1	protein_coding	ensembl	chr19:5707376-5726317:-
143.304	4.97703	2.07196	2.40208				ENSMUSG00000045341	2	Olfr167	protein_coding	ensembl_havana	chr16:19509558-19522266:-
143.243	2.9154	1.41704	2.05738	0.0396493	0.200607	5.25398	ENSMUSG00000039630	10	Hnrnpu	protein_coding	ensembl_havana	chr1:178321108-178337797:-
143.132	0.688066	1.58326	0.434589	0.663861	0.82719	4.5	ENSMUSG00000006699	17	Cdc42	protein_coding	ensembl_havana	chr4:137319696-137357720:-
142.382	-1.89051	2.03899	-0.927179				ENSMUSG00000002844	8	Adprh	protein_coding	ensembl	chr16:38445399-38452689:-
141.916	-2.56794	1.99879	-1.28474	0.198882	0.450908	4.5	ENSMUSG00000026021	15	Sumo1	protein_coding	ensembl_havana	chr1:59586558-59670834:-
141.817	5.03381	1.833	2.74621				ENSMUSG00000027881	14	Prpf38b	protein_coding	ensembl_havana	chr3:108902805-108911727:-
141.718	3.41898	2.16189	1.58147				ENSMUSG00000035725	13	Prkx	protein_coding	ensembl_havana	chrX:77761411-77796278:-
141.501	0.0255628	2.21695	0.0115307				ENSMUSG00000028926	15	Cdk14	protein_coding	ensembl_havana	chr5:4803391-5420312:-
141.102	4.52164	2.25927	2.00138				ENSMUSG00000021253	6	Tgfb3	protein_coding	ensembl	chr12:86056744-86079041:-
141.009	5.63886	2.3797	2.36957				ENSMUSG00000006369	14	Fbln1	protein_coding	ensembl_havana	chr15:85205949-85286535:+
140.897	4.02403	1.98683	2.02535				ENSMUSG00000026504	17	Sdccag8	protein_coding	ensembl_havana	chr1:176814660-177020437:+
140.629	-0.189387	1.69247	-0.1119	0.910903	0.960954	4.5	ENSMUSG00000030798	15	Cd37	protein_coding	ensembl_havana	chr7:45233632-45239115:-
140.098	6.14406	2.01031	3.05628	0.00224103	0.0749317	4.5	ENSMUSG00000026878	16	Rab14	protein_coding	ensembl_havana	chr2:35180205-35201120:-
140.083	4.60066	2.02689	2.26981				ENSMUSG00000031987	6	Egln1	protein_coding	ensembl_havana	chr8:124908587-124949324:-
140.071	0.210054	1.69345	0.124039	0.901285	0.84767	5.72755	ENSMUSG00000020580	9	Rock2	protein_coding	ensembl	chr12:16894978-16988274:+
139.942	-6.53643	2.08695	-3.13205	0.00173591	0.0716106	4.5	ENSMUSG00000033585	5	Ndn	protein_coding	ensembl_havana	chr7:62346569-62350262:+
139.42	3.13516	1.6213	1.93373	0.0531464	0.238273	4.5	ENSMUSG00000052812	4	Atad2b	protein_coding	ensembl	chr12:4917404-5044047:+
139.372	4.28969	1.74364	2.46019	0.0138863	0.132859	4.5	ENSMUSG00000025351	13	Cd63	protein_coding	ensembl	chr10:128908919-128912816:+
139.371	3.23026	1.9329	1.6712				ENSMUSG00000058881	12	Zfp516	protein_coding	ensembl	chr18:82910879-83005314:+
139.3	-0.0697801	2.0993	-0.0332397				ENSMUSG00000042312	9	S100a13	protein_coding	ensembl_havana	chr3:90514435-90524581:+
138.821	-8.67396	2.30065	-3.77023				ENSMUSG00000025427	14	Rnf165	protein_coding	ensembl_havana	chr18:77456110-77565147:-
138.637	0.741723	1.40866	0.526544	0.59851	0.791136	4.5	ENSMUSG00000035021	13	Baz1a	protein_coding	ensembl_havana	chr12:54892989-55014348:-
138.275	4.34957	2.1119	2.05956				ENSMUSG00000035953	13	Tmem55b	protein_coding	ensembl_havana	chr14:50926070-50930856:-
138.23	3.1624	2.09721	1.50791				ENSMUSG00000028771	13	Ptpn12	protein_coding	ensembl_havana	chr5:20986645-21055911:-
138.209	0.258473	1.89359	0.136499	0.891427	0.843831	5.72755	ENSMUSG00000050931	7	Sgms2	protein_coding	ensembl_havana	chr3:131318985-131491411:-
137.828	1.07207	1.68574	0.635965	0.524799	0.737709	4.5	ENSMUSG00000032294	17	Pkm	protein_coding	ensembl_havana	chr9:59656368-59679375:+
137.521	-2.14326	1.51725	-1.41259	0.157775	0.400546	4.5	ENSMUSG00000003123	15	Lipe	protein_coding	ensembl_havana	chr7:25379527-25398710:-
137.253	-0.0335323	1.49692	-0.0224009	0.982128	1	4.5	ENSMUSG00000061232	15	H2-K1	protein_coding	ensembl_havana	chr17:33996017-34000333:-
137.225	2.10479	1.87731	1.12118	0.262213	0.52483	4.5	ENSMUSG00000030094	8	Xpc	protein_coding	ensembl_havana	chr6:91489305-91515888:-
136.726	3.16825	1.85191	1.7108				ENSMUSG00000034641	2	Cd300ld	protein_coding	ensembl_havana	chr11:114982274-114989922:-
136.659	-0.753544	1.76261	-0.427516	0.669003	0.82719	4.5	ENSMUSG00000058126	6	Tpm3-rs7	protein_coding	ensembl	chr14:113314608-113316713:+
136.326	6.71247	2.37175	2.83017				ENSMUSG00000063049	4	Ing2	protein_coding	ensembl_havana	chr8:47667178-47675556:-
136.31	8.13595	2.488	3.27008				ENSMUSG00000025651	14	Uqcrc1	protein_coding	ensembl_havana	chr9:108936633-108949623:+
135.944	6.32198	2.11451	2.98981				ENSMUSG00000023015	13	Racgap1	protein_coding	ensembl_havana	chr15:99620496-99651656:-
135.348	0.957525	1.48884	0.643134	0.520137	0.73597	4.5	ENSMUSG00000079477	9	Rab7	protein_coding	ensembl_havana	chr6:87999106-88045270:-
135.221	1.55614	2.07931	0.748392	0.454224	0.685098	4.5	ENSMUSG00000019054	13	Fis1	protein_coding	ensembl_havana	chr5:136953275-136966234:+
135.028	0.578635	1.90452	0.303822	0.761264	0.874543	4.5	ENSMUSG00000019188	16	H13	protein_coding	ensembl_havana	chr2:152669461-152708670:+
134.866	6.23602	2.11285	2.95147	0.00316266	0.0763113	5.25398	ENSMUSG00000024096	16	Ralbp1	protein_coding	ensembl	chr17:65848433-65885755:-
134.859	5.29837	1.9826	2.67243				ENSMUSG00000051235	8	Gen1	protein_coding	ensembl	chr12:11240926-11265787:-
134.853	-0.523414	1.7779	-0.2944	0.768452	0.878038	4.5	ENSMUSG00000059316	2	Slc27a4	protein_coding	ensembl_havana	chr2:29802634-29817522:+
134.698	-4.11504	1.91522	-2.14859				ENSMUSG00000060131	11	Atp8b4	protein_coding	ensembl_havana	chr2:126320973-126500674:-
134.615	2.09787	1.48638	1.4114	0.158128	0.400546	4.5	ENSMUSG00000070031	11	Sp140	protein_coding	ensembl_havana	chr1:85600378-85645037:+
134.58	-7.77283	2.17848	-3.56801				ENSMUSG00000071652	6	Ints5	protein_coding	ensembl_havana	chr19:8888926-8897890:+
134.364	-4.55645	1.63213	-2.79172	0.00524279	0.0806986	5.72755	ENSMUSG00000019087	13	Atp6ap1	protein_coding	ensembl_havana	chrX:74297097-74304721:+
134.29	-0.87692	1.50973	-0.580844	0.561345	0.674909	5.72755	ENSMUSG00000020594	14	Pum2	protein_coding	ensembl_havana	chr12:8674134-8752581:+
134.278	5.88877	1.85894	3.16782	0.00153586	0.0686022	4.5	ENSMUSG00000067288	12	Rps28	protein_coding	ensembl_havana	chr17:33819027-33824562:-
134.27	3.78103	1.85626	2.0369				ENSMUSG00000030189	15	Ybx3	protein_coding	ensembl_havana	chr6:131364855-131388476:-
134.202	-2.13898	1.58391	-1.35044	0.176874	0.376699	5.72755	ENSMUSG00000022521	10	Crebbp	protein_coding	ensembl_havana	chr16:4081328-4213997:-
133.802	2.61903	1.9524	1.34144				ENSMUSG00000029821	15	Dfna5	protein_coding	ensembl_havana	chr6:50188888-50263862:-
133.518	5.44663	1.97004	2.76474				ENSMUSG00000021965	2	Ska3	protein_coding	ensembl	chr14:57806561-57826163:-
133.321	3.15289	1.86234	1.69297	0.0904604	0.277147	5.25398	ENSMUSG00000025572	17	Tmc6	protein_coding	ensembl_havana	chr11:117765988-117782198:-
132.981	4.61357	1.97983	2.33028				ENSMUSG00000021831	8	Ero1l	protein_coding	ensembl	chr14:45283092-45318572:-
132.894	0.369969	1.83293	0.201845	0.840038	0.92075	4.5	ENSMUSG00000034892	8	Rps29	protein_coding	ensembl_havana	chr12:69157722-69159186:-
132.796	2.05458	1.63089	1.25979	0.207744	0.428436	5.25398	ENSMUSG00000051223	14	Bzw1	protein_coding	ensembl_havana	chr1:58392898-58407353:+
132.792	3.63119	2.10771	1.72282				ENSMUSG00000018765	5	Fxr2	protein_coding	ensembl_havana	chr11:69632990-69653297:+
132.344	-2.44003	2.58121	-0.945305				ENSMUSG00000080990	2	Olfr118	protein_coding	ensembl_havana	chr17:37666988-37673476:+
132.336	0.306584	1.68706	0.181727	0.855797	0.859833	5.25398	ENSMUSG00000026238	14	Ptma	protein_coding	ensembl_havana	chr1:86526726-86530712:+
132.334	-0.28266	1.69907	-0.166361	0.867873	0.864768	5.25398	ENSMUSG00000036427	5	Gpi1	protein_coding	ensembl_havana	chr7:34201330-34230336:-
132.134	5.70998	2.1928	2.60396				ENSMUSG00000061461	11	Smim20	protein_coding	ensembl_havana	chr5:53267083-53278540:+
131.496	2.09668	2.15601	0.972484	0.33081	0.545545	5.25398	ENSMUSG00000026197	12	Zfand2b	protein_coding	ensembl_havana	chr1:75168646-75171629:+
131.211	-4.89679	1.7674	-2.77061				ENSMUSG00000001383	8	Zmat2	protein_coding	ensembl	chr18:36793923-36799660:+
131.022	-0.523693	2.00599	-0.261064	0.794043	0.807193	5.72755	ENSMUSG00000026835	15	Fcnb	protein_coding	ensembl_havana	chr2:28076378-28084885:-
130.818	-0.423582	1.89801	-0.223171	0.823402	0.910961	4.5	ENSMUSG00000024451	8	Arap3	protein_coding	ensembl	chr18:37972624-37997574:-
130.778	-1.01483	2.08498	-0.486734				ENSMUSG00000064109	8	Hcst	protein_coding	ensembl_havana	chr7:30417712-30419854:-
130.727	0.884551	1.39485	0.634156	0.525979	0.737709	4.5	ENSMUSG00000032712	16	2810474O19Rik	protein_coding	ensembl_havana	chr6:149309414-149335663:+
130.541	0.415471	1.60309	0.259169	0.795505	0.895073	4.5	ENSMUSG00000021282	16	Eif5	protein_coding	ensembl	chr12:111538101-111546753:+
130.376	1.59589	2.11616	0.754147	0.450761	0.605475	5.72755	ENSMUSG00000004451	14	Ralb	protein_coding	ensembl_havana	chr1:119470305-119504794:-
130.184	2.96712	1.4622	2.02922	0.0424357	0.199821	5.72755	ENSMUSG00000022378	13	Fam49b	protein_coding	ensembl	chr15:63929097-64060448:-
129.669	-8.23449	2.30051	-3.57942				ENSMUSG00000025212	16	Sfxn3	protein_coding	ensembl	chr19:45047576-45056383:+
129.418	-8.81508	2.37678	-3.70884				ENSMUSG00000035325	16	Sec31a	protein_coding	ensembl_havana	chr5:100361649-100416234:-
129.274	1.1066	1.57079	0.704489	0.481129	0.708192	4.5	ENSMUSG00000020719	14	Ddx5	protein_coding	ensembl_havana	chr11:106780355-106789185:-
129.246	3.62957	1.65732	2.19002				ENSMUSG00000059742	10	Kcnh7	protein_coding	ensembl_havana	chr2:62693414-63184287:-
129.062	-8.26289	2.60914	-3.1669				ENSMUSG00000032112	10	Trappc4	protein_coding	ensembl_havana	chr9:44403698-44407600:-
129.017	5.55291	2.08426	2.66421	0.00771703	0.102662	4.5	ENSMUSG00000026737	12	Pip4k2a	protein_coding	ensembl_havana	chr2:18842255-18998126:-
128.694	3.81773	1.91621	1.99233	0.0463344	0.227479	4.5	ENSMUSG00000004677	17	Myo9b	protein_coding	ensembl_havana	chr8:71272714-71360713:+
128.474	-0.0507081	1.88849	-0.0268511				ENSMUSG00000059089	4	Fcgr4	protein_coding	ensembl_havana	chr1:171018920-171029761:+
128.36	1.0018	2.15262	0.465386	0.641655	0.72604	5.72755	ENSMUSG00000008690	15	Ncaph2	protein_coding	ensembl_havana	chr15:89355719-89372826:+
127.891	-4.71211	2.28374	-2.06333				ENSMUSG00000001482	15	Def8	protein_coding	ensembl_havana	chr8:123423527-123463270:+
127.871	1.29457	1.67743	0.771757	0.440259	0.674909	4.5	ENSMUSG00000053436	14	Mapk14	protein_coding	ensembl_havana	chr17:28691342-28748404:+
127.486	-2.81051	2.27453	-1.23565				ENSMUSG00000014748	13	Tex261	protein_coding	ensembl_havana	chr6:83768885-83775813:-
127.278	-0.652902	2.73115	-0.239058				ENSMUSG00000022587	14	Ly6e	protein_coding	ensembl_havana	chr15:74955051-74959905:+
127.272	-1.79271	2.4123	-0.743152	0.45739	0.610748	5.72755	ENSMUSG00000039886	8	Tmem120a	protein_coding	ensembl_havana	chr5:135735485-135744448:-
127.233	6.96588	2.82542	2.46543				ENSMUSG00000042523	12	Dnal1	protein_coding	ensembl_havana	chr12:84114366-84147498:+
127.16	1.4588	1.4323	1.0185	0.30844	0.564693	4.5	ENSMUSG00000008540	11	Mgst1	protein_coding	ensembl_havana	chr6:138140316-138156755:+
126.927	0.370776	2.00598	0.184835	0.853358	0.929577	4.5	ENSMUSG00000024772	9	Ehd1	protein_coding	ensembl_havana	chr19:6276725-6300096:+
126.447	-7.51767	2.37559	-3.16455				ENSMUSG00000023044	1	Csad	protein_coding	ensembl	chr15:102176998-102189043:-
126.326	-8.38828	2.38592	-3.51573				ENSMUSG00000050910	5	Cdr2l	protein_coding	ensembl_havana	chr11:115381916-115396132:+
126.205	6.68095	2.50408	2.66803				ENSMUSG00000055782	8	Abcd2	protein_coding	ensembl	chr15:91145884-91191807:-
125.991	-0.467524	1.70964	-0.273463	0.784497	0.889016	4.5	ENSMUSG00000028603	15	Scp2	protein_coding	ensembl_havana	chr4:108043839-108144998:-
125.859	2.12434	2.02997	1.04649				ENSMUSG00000051457	7	Spn	protein_coding	ensembl_havana	chr7:127132232-127137823:-
125.762	4.38318	2.29857	1.90691				ENSMUSG00000014075	15	Tctex1d2	protein_coding	ensembl_havana	chr16:32419702-32429099:+
125.622	3.05021	1.56711	1.9464	0.0516071	0.23461	4.5	ENSMUSG00000034120	18	Srsf2	protein_coding	ensembl_havana	chr11:116849901-116853094:-
125.521	-0.104707	2.26227	-0.0462841				ENSMUSG00000055436	18	Srsf11	protein_coding	ensembl_havana	chr3:158010473-158036639:-
124.939	0.972244	1.57873	0.615841	0.538	0.691411	5.25398	ENSMUSG00000034158	9	Lrrc58	protein_coding	ensembl_havana	chr16:37868389-37888858:+
124.69	3.39295	1.82269	1.86151	0.0626724	0.231336	5.72755	ENSMUSG00000026922	13	Agpat2	protein_coding	ensembl_havana	chr2:26593057-26604417:-
124.439	1.51044	1.71089	0.88284	0.377323	0.55491	5.72755	ENSMUSG00000038775	14	Vill	protein_coding	ensembl_havana	chr9:119052778-119071525:+
124.225	1.78879	2.01048	0.889734	0.373609	0.551509	5.72755	ENSMUSG00000030706	17	Mrpl48	protein_coding	ensembl_havana	chr7:100545751-100608301:-
123.992	-0.956364	1.95442	-0.489333	0.624606	0.715703	5.72755	ENSMUSG00000019066	13	Rab3d	protein_coding	ensembl_havana	chr9:21907491-21918192:-
123.631	-0.00360665	1.7598	-0.00204946	0.998365	0.930189	5.25398	ENSMUSG00000030168	13	Adipor2	protein_coding	ensembl_havana	chr6:119353150-119417704:-
123.504	2.25484	2.12256	1.06232	0.288091	0.548538	4.5	ENSMUSG00000071649	5	B3gat3	protein_coding	ensembl	chr19:8920374-8927234:+
122.654	-2.93448	1.31496	-2.23161	0.0256408	0.180351	4.5	ENSMUSG00000029254	16	Stap1	protein_coding	ensembl_havana	chr5:86071746-86106125:+
122.626	1.60933	1.80898	0.889632	0.373663	0.551509	5.72755	ENSMUSG00000024011	16	Pi16	protein_coding	ensembl_havana	chr17:29318877-29329413:+
122.365	-3.23359	1.83292	-1.76418	0.0777025	0.277635	4.5	ENSMUSG00000029655	17	N4bp2l2	protein_coding	ensembl_havana	chr5:150608007-150666183:-
122.163	-0.852162	2.39694	-0.35552				ENSMUSG00000026456	18	Cyb5r1	protein_coding	ensembl_havana	chr1:134405559-134411740:+
122.085	1.11003	1.77765	0.624437	0.532341	0.742384	4.5	ENSMUSG00000047187	9	Rab2a	protein_coding	ensembl_havana	chr4:8535644-8607778:+
121.897	1.7529	1.78141	0.983996	0.325117	0.579335	4.5	ENSMUSG00000027763	13	Mbnl1	protein_coding	ensembl_havana	chr3:60472830-60629750:+
121.877	7.14341	2.22908	3.20465				ENSMUSG00000021114	8	Atp6v1d	protein_coding	ensembl	chr12:78842989-78861638:-
121.732	2.19955	1.66815	1.31855	0.187318	0.385711	5.72755	ENSMUSG00000039753	16	Fbxl5	protein_coding	ensembl_havana	chr5:43744615-43821638:-
121.592	0.332899	2.08981	0.159296	0.873435	0.940636	4.5	ENSMUSG00000028081	6	Rps3a1	protein_coding	ensembl_havana	chr3:86137940-86142702:-
121.516	4.34455	1.93034	2.25067				ENSMUSG00000061136	14	Prpf40a	protein_coding	ensembl_havana	chr2:53134704-53191284:-
121.325	-0.853086	2.00514	-0.42545				ENSMUSG00000055239	10	Kcmf1	protein_coding	ensembl_havana	chr6:72841114-72899979:-
120.977	0.332143	1.7667	0.188001	0.850875	0.928464	4.5	ENSMUSG00000031004	8	Mki67	protein_coding	ensembl_havana	chr7:135689784-135716361:-
120.625	1.48011	1.32297	1.11878	0.263233	0.459928	5.72755	ENSMUSG00000025862	14	Stag2	protein_coding	ensembl_havana	chrX:42149317-42277185:+
120.408	6.20118	2.22859	2.78255				ENSMUSG00000015291	10	Gdi1	protein_coding	ensembl_havana	chrX:74304998-74311862:+
120.319	-1.16096	1.71648	-0.67636	0.498812	0.661436	5.25398	ENSMUSG00000044768	16	D1Ertd622e	protein_coding	ensembl_havana	chr1:97606318-97662074:-
120.134	1.73843	1.58388	1.09758	0.272387	0.534748	4.5	ENSMUSG00000032330	7	Cox7a2	protein_coding	ensembl_havana	chr9:79755361-79759878:-
119.918	-0.901059	1.78814	-0.50391	0.614325	0.801055	4.5	ENSMUSG00000037295	7	Ldlrap1	protein_coding	ensembl_havana	chr4:134741554-134768024:-
119.803	-10.7747	2.411	-4.46897				ENSMUSG00000030219	13	Erp27	protein_coding	ensembl_havana	chr6:136907311-136922180:-
119.578	1.84594	1.63317	1.13029	0.258355	0.475811	5.25398	ENSMUSG00000073386	4	9830107B12Rik	protein_coding	ensembl	chr17:48125605-48146307:-
119.454	1.84686	2.24095	0.824141				ENSMUSG00000036450	4	Hif1an	protein_coding	ensembl_havana	chr19:44562850-44576274:+
119.353	4.2953	1.68318	2.55189	0.0107139	0.119832	4.5	ENSMUSG00000015937	14	H2afy	protein_coding	ensembl_havana	chr13:56073619-56136361:-
119.098	5.11074	1.89762	2.69324	0.00707616	0.0985834	4.5	ENSMUSG00000020163	12	Uqcr11	protein_coding	ensembl_havana	chr10:80402997-80406830:-
119.005	1.76873	1.55546	1.13711	0.255491	0.517243	4.5	ENSMUSG00000031229	16	Atrx	protein_coding	ensembl_havana	chrX:105797615-105929403:-
118.972	2.081	1.68884	1.23221	0.217872	0.438419	5.25398	ENSMUSG00000071713	4	Csf2rb	protein_coding	ensembl	chr15:78325990-78351000:+
118.971	-0.758914	1.34708	-0.563377	0.573178	0.682132	5.72755	ENSMUSG00000054404	13	Slfn5	protein_coding	ensembl_havana	chr11:82951349-82964840:+
118.929	-2.00365	1.46218	-1.37031	0.170589	0.36828	5.72755	ENSMUSG00000034614	14	Pik3ip1	protein_coding	ensembl_havana	chr11:3330401-3342971:+
118.277	-1.19384	1.64612	-0.725247	0.4683	0.644115	5.25398	ENSMUSG00000034390	16	Cmip	protein_coding	ensembl_havana	chr8:117257064-117459430:+
118.244	-0.845109	1.9083	-0.442859				ENSMUSG00000036030	9	Prtg	protein_coding	ensembl_havana	chr9:72806874-72917291:+
118.059	0.0896971	1.99637	0.04493				ENSMUSG00000029723	16	Tsc22d4	protein_coding	ensembl_havana	chr5:137745730-137768450:+
117.95	2.73406	1.65559	1.65141	0.0986541	0.312856	4.5	ENSMUSG00000028367	5	Txn1	protein_coding	ensembl_havana	chr4:57943373-57956411:-
117.417	0.764969	1.55167	0.492997	0.622015	0.742384	5.25398	ENSMUSG00000032872	16	Cyb5r4	protein_coding	ensembl_havana	chr9:87022014-87077774:+
117.407	1.08203	2.16431	0.499943				ENSMUSG00000020964	14	Sel1l	protein_coding	ensembl_havana	chr12:91806043-91849157:-
117.184	2.23253	1.85346	1.20452				ENSMUSG00000016534	15	Lamp2	protein_coding	ensembl_havana	chrX:38401357-38456454:-
117.153	1.03294	1.49216	0.692245	0.488784	0.71465	4.5	ENSMUSG00000026987	16	Baz2b	protein_coding	ensembl_havana	chr2:59899363-60209839:-
117.057	3.38117	2.10685	1.60485				ENSMUSG00000021610	7	Clptm1l	protein_coding	ensembl	chr13:73604002-73620639:+
116.861	-0.293733	1.73909	-0.1689	0.865875	0.863669	5.25398	ENSMUSG00000028788	14	Ptp4a2	protein_coding	ensembl_havana	chr4:129811219-129850003:+
116.274	2.2997	1.62588	1.41443	0.157234	0.400518	4.5	ENSMUSG00000064065	15	Ipcef1	protein_coding	ensembl_havana	chr10:6885796-7052478:-
115.938	2.65793	2.0065	1.32466				ENSMUSG00000055053	17	Nfic	protein_coding	ensembl_havana	chr10:81396186-81431005:-
115.696	9.93107	2.84383	3.49215				ENSMUSG00000030154	10	Klrb1f	protein_coding	ensembl_havana	chr6:129045901-129057464:+
115.694	1.06603	1.58163	0.67401	0.500305	0.637686	5.72755	ENSMUSG00000057193	8	Slc44a2	protein_coding	ensembl_havana	chr9:21320698-21355028:+
115.51	-1.51281	1.75703	-0.861001	0.389237	0.635024	4.5	ENSMUSG00000018736	14	Ndel1	protein_coding	ensembl_havana	chr11:68821434-68871858:-
115.306	-0.871766	1.78153	-0.489337	0.624603	0.807703	4.5	ENSMUSG00000028822	11	Tmem50a	protein_coding	ensembl_havana	chr4:134897849-134915024:-
115.247	-2.65861	1.94636	-1.36594	0.171959	0.42049	4.5	ENSMUSG00000036438	12	Calm2	protein_coding	ensembl_havana	chr17:87433412-87446935:-
114.81	-0.337891	1.8677	-0.180912	0.856436	0.829057	5.72755	ENSMUSG00000071172	12	Srsf3	protein_coding	ensembl_havana	chr17:29032673-29043366:+
114.795	1.38593	1.57579	0.879515	0.379122	0.555509	5.72755	ENSMUSG00000019907	9	Ppp1r12a	protein_coding	ensembl	chr10:108162400-108277575:+
114.55	1.24837	1.3662	0.913751	0.360848	0.611192	4.5	ENSMUSG00000028465	16	Tln1	protein_coding	ensembl_havana	chr4:43531519-43562691:-
114.503	5.35619	2.31852	2.31017				ENSMUSG00000065990	12	Aurkaip1	protein_coding	ensembl_havana	chr4:155831272-155833130:+
114.213	-3.406	1.95975	-1.73798	0.0822151	0.261327	5.72755	ENSMUSG00000003031	14	Cdkn1b	protein_coding	ensembl_havana	chr6:134920401-134925513:+
114.111	4.52752	2.03563	2.22413				ENSMUSG00000037573	5	Tob1	protein_coding	ensembl_havana	chr11:94211454-94215495:+
113.957	2.55807	2.0983	1.21912				ENSMUSG00000069520	5	Tmem19	protein_coding	ensembl	chr10:115340739-115362262:-
113.915	5.09956	2.41048	2.11558				ENSMUSG00000021765	7	Fst	protein_coding	ensembl	chr13:114452262-114458730:-
113.886	-1.06822	1.87882	-0.56856	0.569655	0.680011	5.72755	ENSMUSG00000021596	16	Mctp1	protein_coding	ensembl_havana	chr13:76384535-77031810:+
113.686	-0.814017	1.72371	-0.472246	0.636751	0.814581	4.5	ENSMUSG00000026786	14	Apbb1ip	protein_coding	ensembl_havana	chr2:22774094-22875653:+
113.457	-2.32075	2.08042	-1.11552				ENSMUSG00000030144	4	Clec4d	protein_coding	ensembl_havana	chr6:123262111-123275265:+
113.44	0.346987	1.96295	0.176769	0.85969	0.932955	4.5	ENSMUSG00000051314	11	Ffar2	protein_coding	ensembl_havana	chr7:30818348-30823775:-
113.337	0.21813	1.67704	0.130068	0.896512	0.951779	4.5	ENSMUSG00000054733	9	Msra	protein_coding	ensembl_havana	chr14:64122625-64455903:-
113.285	-5.22239	2.05036	-2.54707				ENSMUSG00000031386	14	Hcfc1	protein_coding	ensembl_havana	chrX:73942792-73966357:-
113.282	3.87486	1.54131	2.51401	0.0119368	0.125969	4.5	ENSMUSG00000045636	16	Mtus1	protein_coding	ensembl_havana	chr8:40990914-41133726:-
113.243	2.59186	2.06094	1.25761	0.208532	0.461919	4.5	ENSMUSG00000056537	11	Rlim	protein_coding	ensembl_havana	chrX:103957163-103981284:-
113.02	7.00463	2.52244	2.77693				ENSMUSG00000022900	14	Ildr1	protein_coding	ensembl_havana	chr16:36693978-36726804:+
112.823	3.52287	1.65674	2.12639	0.033471	0.18967	5.25398	ENSMUSG00000040152	8	Thbs1	protein_coding	ensembl_havana	chr2:118111876-118127133:+
112.789	4.67656	1.55944	2.99888	0.00270973	0.0763113	4.5	ENSMUSG00000021546	17	Hnrnpk	protein_coding	ensembl_havana	chr13:58391142-58403343:-
112.682	0.501057	1.70072	0.294615	0.768288	0.878038	4.5	ENSMUSG00000047888	9	Tnrc6b	protein_coding	ensembl	chr15:80711319-80941086:+
112.483	-2.51575	1.82225	-1.38058	0.167409	0.41254	4.5	ENSMUSG00000060636	13	Rpl35a	protein_coding	ensembl_havana	chr16:33056453-33060189:+
112.018	4.93107	2.12287	2.32283				ENSMUSG00000078429	8	Ctdsp2	protein_coding	ensembl	chr10:126978717-126999975:+
111.877	-1.92321	1.85929	-1.03438				ENSMUSG00000033335	17	Dnm2	protein_coding	ensembl_havana	chr9:21424908-21507759:+
111.843	5.19316	2.08639	2.48906				ENSMUSG00000020015	10	Cdk17	protein_coding	ensembl_havana	chr10:93160875-93267071:+
111.789	5.0109	2.16638	2.31303				ENSMUSG00000045438	12	Cox19	protein_coding	ensembl_havana	chr5:139336189-139351418:-
111.328	-0.817987	2.07984	-0.393292	0.694104	0.838958	4.5	ENSMUSG00000027398	13	Il1b	protein_coding	ensembl_havana	chr2:129364570-129371139:-
111.118	-0.735606	1.64361	-0.447554	0.654475	0.733797	5.72755	ENSMUSG00000027808	8	Serp1	protein_coding	ensembl_havana	chr3:58519817-58525892:-
110.866	3.70793	1.92055	1.93066				ENSMUSG00000025130	11	P4hb	protein_coding	ensembl_havana	chr11:120560298-120573253:-
110.651	-3.29478	1.9849	-1.65992				ENSMUSG00000037993	8	Dhx38	protein_coding	ensembl_havana	chr8:109548011-109565861:-
110.43	-3.79637	1.93778	-1.95913				ENSMUSG00000036469	16	March1	protein_coding	ensembl_havana	chr8:65617900-66471637:+
110.297	3.35354	1.65328	2.02842	0.0425175	0.220435	4.5	ENSMUSG00000025958	14	Creb1	protein_coding	ensembl_havana	chr1:64532645-64604548:+
110.17	23.393	2.9527	7.92258				ENSMUSG00000014402	15	Tsg101	protein_coding	ensembl_havana	chr7:46888949-46919969:-
110.111	-4.2242	1.82917	-2.30935	0.0209242	0.151804	5.25398	ENSMUSG00000024308	14	Tapbp	protein_coding	ensembl_havana	chr17:33915899-33929288:+
109.576	-1.22477	1.40777	-0.870009	0.384295	0.630198	4.5	ENSMUSG00000042369	8	Rbm45	protein_coding	ensembl_havana	chr2:76369984-76383768:+
109.292	-0.115518	1.61738	-0.0714231				ENSMUSG00000078578	9	Ube2d3	protein_coding	ensembl_havana	chr3:135438149-135468198:+
109.225	4.11488	2.14638	1.91713				ENSMUSG00000044134	9	Fam109a	protein_coding	ensembl_havana	chr5:121848984-121854632:+
109.063	-2.56653	1.75386	-1.46336	0.143368	0.382509	4.5	ENSMUSG00000034889	7	Cactin	protein_coding	ensembl	chr10:81321103-81326251:+
108.78	-1.75245	2.04192	-0.858234	0.390763	0.636532	4.5	ENSMUSG00000020205	8	Phlda1	protein_coding	ensembl_havana	chr10:111506286-111508645:+
108.647	-0.782681	1.84145	-0.425035	0.670811	0.828202	4.5	ENSMUSG00000031749	12	St3gal2	protein_coding	ensembl_havana	chr8:110919922-110972480:+
108.495	1.30063	2.07167	0.627819	0.530122	0.685098	5.25398	ENSMUSG00000031605	8	Klhl2	protein_coding	ensembl_havana	chr8:64739675-64850017:-
108.177	4.18038	1.88908	2.21292				ENSMUSG00000064367	1	mt-Nd5	protein_coding	insdc	chrM:11742-13565:+
108.174	2.79696	1.84413	1.51668				ENSMUSG00000031093	14	Dock11	protein_coding	ensembl_havana	chrX:35888832-36076562:+
107.392	5.41932	2.2013	2.46187	0.0138213	0.132823	4.5	ENSMUSG00000060935	6	Tmem263	protein_coding	ensembl_havana	chr10:85102627-85120618:+
107.332	7.78529	2.2951	3.39214				ENSMUSG00000067150	5	Xpo5	protein_coding	ensembl	chr17:46202855-46242299:+
107.279	-0.995762	1.52068	-0.654816	0.512587	0.644213	5.72755	ENSMUSG00000044786	6	Zfp36	protein_coding	ensembl_havana	chr7:28376784-28380253:-
107.259	5.23904	1.89545	2.76401				ENSMUSG00000020400	17	Tnip1	protein_coding	ensembl_havana	chr11:54910785-54962917:-
107.179	-2.70399	2.45424	-1.10176				ENSMUSG00000028494	12	Plin2	protein_coding	ensembl_havana	chr4:86648386-86670060:-
107.084	6.71547	2.82132	2.38026				ENSMUSG00000036206	12	Sh3bp4	protein_coding	ensembl_havana	chr1:89070415-89155068:+
106.859	-4.65049	2.21186	-2.10253				ENSMUSG00000073530	11	Pappa2	protein_coding	ensembl_havana	chr1:158711727-158980490:-
106.676	2.18616	1.92305	1.13682				ENSMUSG00000079597	1	Gm5483	protein_coding	ensembl	chr16:36184212-36188111:+
106.671	5.52096	2.01762	2.73638	0.006212	0.0883601	5.25398	ENSMUSG00000024912	5	Fosl1	protein_coding	ensembl	chr19:5447703-5455945:+
106.667	-2.83608	1.76612	-1.60583	0.108312	0.32562	4.5	ENSMUSG00000053929	16	Cyhr1	protein_coding	ensembl_havana	chr15:76643395-76660117:-
106.521	1.16315	2.04629	0.568418	0.569751	0.680011	5.72755	ENSMUSG00000090000	1	Ier3ip1	protein_coding	ensembl_havana	chr18:76930017-76941605:+
106.053	-2.30534	1.55109	-1.48627	0.137207	0.374114	4.5	ENSMUSG00000051747	14	Ttn	protein_coding	ensembl_havana	chr2:76703980-76982547:-
105.812	-0.61858	1.95738	-0.316025				ENSMUSG00000028249	15	Sdcbp	protein_coding	ensembl_havana	chr4:6365650-6408423:+
105.761	8.33161	2.36508	3.52276				ENSMUSG00000002102	15	Psmc3	protein_coding	ensembl_havana	chr2:91054009-91066369:+
105.717	-7.01135	1.98063	-3.53996				ENSMUSG00000028692	14	Akr1a1	protein_coding	ensembl_havana	chr4:116636510-116651680:-
105.3	-0.487711	1.81843	-0.268204	0.788542	0.890107	4.5	ENSMUSG00000021178	8	Psmc1	protein_coding	ensembl	chr12:100110186-100123364:+
105.272	1.66318	1.92102	0.865782				ENSMUSG00000039191	12	Rbpj	protein_coding	ensembl_havana	chr5:53466152-53657362:+
105.231	-2.90628	1.85903	-1.56333				ENSMUSG00000021585	8	Cast	protein_coding	ensembl	chr13:74694286-74807921:-
105.141	-2.89387	1.58949	-1.82063	0.0686633	0.249303	5.25398	ENSMUSG00000061755	10	Bod1l	protein_coding	ensembl_havana	chr5:41787538-41844315:-
104.987	2.54995	1.37217	1.85833	0.0631216	0.257715	4.5	ENSMUSG00000046364	14	Rpl27a	protein_coding	ensembl_havana	chr7:109519147-109522367:+
104.885	-8.60658	2.31221	-3.72223				ENSMUSG00000070683	7	Lactbl1	protein_coding	ensembl_havana	chr4:136622621-136639110:+
104.736	2.24511	1.70543	1.31644	0.188025	0.439156	4.5	ENSMUSG00000037361	7	Sf3b6	protein_coding	ensembl	chr12:4817608-4827658:+
104.627	3.98504	1.57919	2.52347	0.0116203	0.125459	4.5	ENSMUSG00000000530	16	Acvrl1	protein_coding	ensembl_havana	chr15:101128522-101145336:+
104.319	0.349072	1.81933	0.191869				ENSMUSG00000052296	7	Ppp6r1	protein_coding	ensembl_havana	chr7:4631495-4659019:-
104.309	0.268555	1.57375	0.170647	0.864501	0.936576	4.5	ENSMUSG00000020914	17	Top2a	protein_coding	ensembl_havana	chr11:98992943-99024189:-
104.171	4.90785	2.04725	2.39728				ENSMUSG00000020454	17	Eif4enif1	protein_coding	ensembl_havana	chr11:3202392-3244588:+
104.073	3.29837	2.50236	1.31811	0.187468	0.439147	4.5	ENSMUSG00000036299	4	BC031181	protein_coding	ensembl	chr18:75005900-75009933:+
104.036	0.324764	1.68131	0.193161	0.846833	0.925912	4.5	ENSMUSG00000038095	15	Sbno1	protein_coding	ensembl_havana	chr5:124368702-124426001:-
103.901	7.6312	2.47556	3.08262				ENSMUSG00000045128	9	Rpl18a	protein_coding	ensembl_havana	chr8:70894722-70897412:-
103.784	4.51117	1.75653	2.56823	0.0102218	0.115961	4.5	ENSMUSG00000026915	16	Strbp	protein_coding	ensembl_havana	chr2:37483228-37703859:-
103.581	-7.8424	2.13385	-3.67524				ENSMUSG00000026648	18	Dclre1c	protein_coding	ensembl_havana	chr2:3424131-3464130:+
103.386	1.46914	1.53994	0.954022	0.340073	0.549752	5.25398	ENSMUSG00000030720	16	Cln3	protein_coding	ensembl_havana	chr7:126571207-126585817:-
103.354	-3.38666	1.85961	-1.82117	0.0685808	0.266427	4.5	ENSMUSG00000028248	15	Pnisr	protein_coding	ensembl_havana	chr4:21847583-21876475:+
103.264	-6.9832	2.38396	-2.92925				ENSMUSG00000017692	8	Rhbdl3	protein_coding	ensembl_havana	chr11:80300912-80355955:+
103.246	1.8935	1.99261	0.95026	0.34198	0.593054	4.5	ENSMUSG00000022667	17	Cd200r1	protein_coding	ensembl_havana	chr16:44765736-44794978:+
103.109	-0.910369	1.62886	-0.558899	0.576231	0.684145	5.72755	ENSMUSG00000008730	17	Hipk1	protein_coding	ensembl_havana	chr3:103739815-103791563:-
103.08	0.755808	1.57466	0.479982	0.63124	0.747325	5.25398	ENSMUSG00000052837	6	Junb	protein_coding	ensembl_havana	chr8:84974484-84978718:-
102.662	3.10642	1.83445	1.69337				ENSMUSG00000060538	14	Tmem219	protein_coding	ensembl_havana	chr7:126886171-126922917:-
102.525	0.936602	1.90633	0.491312	0.623206	0.742384	5.25398	ENSMUSG00000093674	7	Rpl41	protein_coding	ensembl_havana	chr10:128548114-128549305:-
102.15	8.93695	2.75551	3.24331				ENSMUSG00000000094	12	Tbx4	protein_coding	ensembl_havana	chr11:85886422-85916097:+
102.129	1.95719	1.86433	1.04981	0.293807	0.551509	4.5	ENSMUSG00000012848	15	Rps5	protein_coding	ensembl_havana	chr7:12922290-12926686:+
101.962	0.290297	1.94837	0.148995				ENSMUSG00000029632	7	Ndufa4	protein_coding	ensembl_havana	chr6:11900292-11907497:-
101.944	-10.4111	2.86079	-3.63924				ENSMUSG00000049604	3	Hoxb13	protein_coding	ensembl_havana	chr11:96194316-96197447:+
101.863	4.47049	1.72156	2.59676	0.00941084	0.10301	5.25398	ENSMUSG00000041408	16	Wapl	protein_coding	ensembl_havana	chr14:34673928-34747983:+
101.858	1.66575	2.01657	0.826031	0.408786	0.648668	4.5	ENSMUSG00000034757	15	Tmub2	protein_coding	ensembl_havana	chr11:102284931-102289237:+
101.411	7.13065	2.29621	3.1054				ENSMUSG00000027601	13	Mtfr1	protein_coding	ensembl_havana	chr3:19187327-19220817:+
101.216	4.92436	1.8125	2.71689	0.00658986	0.0955249	4.5	ENSMUSG00000032384	16	Csnk1g1	protein_coding	ensembl_havana	chr9:65908924-66045015:+
101.096	-1.34293	2.33646	-0.574772				ENSMUSG00000040560	9	Wdr7	protein_coding	ensembl	chr18:63708695-63989760:+
100.935	0.519095	1.68013	0.308961	0.757351	0.873081	4.5	ENSMUSG00000040699	13	Limd2	protein_coding	ensembl_havana	chr11:106156256-106160860:-
100.849	0.971426	1.77362	0.547709				ENSMUSG00000058818	13	Pirb	protein_coding	ensembl_havana	chr7:3711409-3720391:-
100.735	-26.6148	3.05438	-8.71364				ENSMUSG00000057149	3	Olfr1301	protein_coding	ensembl_havana	chr2:111751006-111755888:+
100.586	0.593998	1.37682	0.431428	0.666157	0.82719	4.5	ENSMUSG00000001156	9	Mxd1	protein_coding	ensembl_havana	chr6:86647042-86669161:-
100.452	-7.8605	2.27175	-3.46011				ENSMUSG00000021322	7	Aoah	protein_coding	ensembl	chr13:20794119-21024252:+
100.294	2.13002	1.59262	1.33743	0.181082	0.397301	5.25398	ENSMUSG00000020340	16	Cyfip2	protein_coding	ensembl_havana	chr11:46193850-46312859:-
100.156	-1.50822	1.75451	-0.859628	0.389994	0.58491	5.25398	ENSMUSG00000042444	10	Fam63b	protein_coding	ensembl_havana	chr9:70599014-70657174:-
99.8464	3.9896	1.99789	1.9969	0.0458358	0.213529	5.25398	ENSMUSG00000037731	5	Themis2	protein_coding	ensembl_havana	chr4:132781843-132796387:-
99.8446	-0.909187	2.09456	-0.434071	0.664237	0.737087	5.72755	ENSMUSG00000089847	8	Timm10b	protein_coding	ensembl_havana	chr7:105640056-105643637:+
99.8326	-0.883107	1.5686	-0.56299	0.573441	0.682132	5.72755	ENSMUSG00000020788	15	Atp2a3	protein_coding	ensembl_havana	chr11:72961169-72993044:+
99.7733	7.55685	2.54022	2.97488				ENSMUSG00000015092	9	Edf1	protein_coding	ensembl_havana	chr2:25557847-25562082:+
99.6801	-0.442843	1.57255	-0.281607	0.778245	0.82719	5.25398	ENSMUSG00000017291	13	Taok1	protein_coding	ensembl_havana	chr11:77529162-77607815:-
99.673	-6.11777	2.41734	-2.53079				ENSMUSG00000048022	11	Tmem229a	protein_coding	ensembl_havana	chr6:24951141-24956297:-
99.5102	-1.00009	1.78991	-0.558739				ENSMUSG00000030451	15	Herc2	protein_coding	ensembl_havana	chr7:56050196-56231800:+
99.3499	-7.99205	2.08115	-3.84021				ENSMUSG00000018820	13	Zfyve27	protein_coding	ensembl_havana	chr19:42163951-42194590:+
99.03	3.70702	1.84839	2.00554				ENSMUSG00000024695	15	Zfp91	protein_coding	ensembl_havana	chr19:12763660-12796126:-
98.9997	7.33795	2.14251	3.42493	0.000614953	0.0631664	4.5	ENSMUSG00000034165	16	Ccnd3	protein_coding	ensembl_havana	chr17:47505051-47599691:+
98.8292	-5.78155	2.22431	-2.59925				ENSMUSG00000002625	9	Akap8l	protein_coding	ensembl	chr17:32321425-32350581:-
98.6327	-1.61639	2.0216	-0.79956	0.423966	0.584782	5.72755	ENSMUSG00000056429	4	Tgoln1	protein_coding	ensembl_havana	chr6:72608432-72617000:-
98.6206	5.04884	2.19515	2.3				ENSMUSG00000028447	11	Dctn3	protein_coding	ensembl_havana	chr4:41714798-41723170:-
98.4489	2.77295	1.95248	1.42022	0.155544	0.397808	4.5	ENSMUSG00000029066	12	Mrpl20	protein_coding	ensembl_havana	chr4:155802878-155809975:+
98.4052	3.74062	1.63856	2.28287	0.022438	0.158741	5.25398	ENSMUSG00000020745	15	Pafah1b1	protein_coding	ensembl_havana	chr11:74673949-74724670:-
98.3674	4.29707	2.81399	1.52704				ENSMUSG00000026185	8	Igfbp5	protein_coding	ensembl_havana	chr1:72857932-72874884:-
98.2187	2.92042	1.84645	1.58164	0.113732	0.332045	4.5	ENSMUSG00000032202	11	Rab27a	protein_coding	ensembl_havana	chr9:73044854-73097629:+
98.209	-2.2321	2.04474	-1.09163	0.274997	0.537192	4.5	ENSMUSG00000060126	14	Tpt1	protein_coding	ensembl_havana	chr14:75845093-75848525:+
98.1863	-0.193652	1.88011	-0.103	0.917963	0.855154	5.72755	ENSMUSG00000036943	9	Rab8b	protein_coding	ensembl_havana	chr9:66843664-66919687:-
97.8679	6.47386	1.97151	3.2837	0.00102452	0.0645746	5.72755	ENSMUSG00000017631	18	Abr	protein_coding	ensembl_havana	chr11:76416734-76622314:-
97.7494	0.4102	2.10253	0.195098				ENSMUSG00000043940	15	Wdfy3	protein_coding	ensembl_havana	chr5:101832956-102069921:-
97.7433	0.584668	1.73251	0.337468	0.735764	0.777609	5.72755	ENSMUSG00000030314	16	Atg7	protein_coding	ensembl_havana	chr6:114643097-114860614:+
97.6943	3.26361	2.01526	1.61944	0.105352	0.321634	4.5	ENSMUSG00000048277	15	Syngr2	protein_coding	ensembl_havana	chr11:117809668-117814283:+
97.6798	1.38546	1.57763	0.878187	0.379842	0.579335	5.25398	ENSMUSG00000069515	5	Lyz1	protein_coding	ensembl	chr10:117287796-117292868:-
97.6112	-2.06924	1.93382	-1.07003				ENSMUSG00000020315	18	Sptbn1	protein_coding	ensembl_havana	chr11:30099395-30268175:-
97.5985	-5.16017	2.40433	-2.1462				ENSMUSG00000052417	6	Olfr720	protein_coding	ensembl_havana	chr14:14171738-14186838:-
97.4976	2.54396	1.98083	1.28429				ENSMUSG00000006392	16	Med8	protein_coding	ensembl_havana	chr4:118409337-118415782:+
97.3671	4.51698	2.60624	1.73314				ENSMUSG00000067522	3	Olfr76	protein_coding	ensembl_havana	chr19:12117996-12123203:-
97.3368	-0.953999	2.01088	-0.474418	0.635202	0.814238	4.5	ENSMUSG00000030427	17	Lilra6	protein_coding	ensembl_havana	chr7:3908280-3915503:-
97.2347	-3.06851	1.77518	-1.72856	0.0838874	0.267003	5.25398	ENSMUSG00000000560	9	Gabra2	protein_coding	ensembl_havana	chr5:70957597-71095849:-
97.0354	3.7784	2.26546	1.66783				ENSMUSG00000033701	13	Acbd6	protein_coding	ensembl_havana	chr1:155558120-155691330:+
96.8854	0.193396	1.72237	0.112284	0.910598	0.960954	4.5	ENSMUSG00000071637	5	Cebpd	protein_coding	havana	chr16:15887286-15891031:+
96.8037	1.4548	1.96166	0.741616				ENSMUSG00000056917	12	Sipa1	protein_coding	ensembl	chr19:5651185-5663707:-
96.7942	0.857968	1.74976	0.490334	0.623897	0.742834	5.25398	ENSMUSG00000025060	14	Slk	protein_coding	ensembl_havana	chr19:47579678-47645246:+
96.6847	4.65853	2.32263	2.00571				ENSMUSG00000023055	9	Calcoco1	protein_coding	ensembl_havana	chr15:102706779-102722178:-
96.6433	1.67338	1.72713	0.968876	0.332607	0.584675	4.5	ENSMUSG00000060019	5	Gm10073	protein_coding	ensembl	chr8:106572966-106573461:-
96.6112	5.33958	2.15608	2.47652				ENSMUSG00000001034	17	Mapk7	protein_coding	ensembl_havana	chr11:61488812-61494406:-
96.5852	3.25695	1.52045	2.14209	0.0321859	0.197368	4.5	ENSMUSG00000037458	14	Azin1	protein_coding	ensembl_havana	chr15:38487430-38519266:-
96.5822	0.402406	1.82804	0.22013	0.82577	0.823092	5.72755	ENSMUSG00000106918	3	Mrpl33	protein_coding	ensembl_havana	chr5:31596935-31664384:+
96.4125	1.69141	1.49986	1.12772	0.25944	0.475949	5.25398	ENSMUSG00000021218	9	Gdi2	protein_coding	ensembl	chr13:3538075-3566261:+
96.214	-3.63821	1.92477	-1.8902				ENSMUSG00000062866	15	Phactr2	protein_coding	ensembl_havana	chr10:13207717-13474396:-
96.2039	3.83262	2.05474	1.86526	0.0621455	0.255845	4.5	ENSMUSG00000022890	13	Atp5j	protein_coding	ensembl_havana	chr16:84827866-84835625:-
95.4208	-1.86521	1.79397	-1.03971	0.298475	0.555857	4.5	ENSMUSG00000000826	16	Dnajc5	protein_coding	ensembl_havana	chr2:181520485-181555133:+
95.3136	-1.33463	1.64087	-0.813369	0.416007	0.651803	4.5	ENSMUSG00000052270	7	Fpr2	protein_coding	ensembl_havana	chr17:17887824-17893952:+
95.1571	0.635857	1.59278	0.399211	0.689738	0.836546	4.5	ENSMUSG00000020272	8	Stk10	protein_coding	ensembl_havana	chr11:32533305-32624587:+
95.1532	-12.284	2.59008	-4.74272				ENSMUSG00000074780	1	Anapc15-ps	protein_coding	ensembl	chr10:95672991-95673451:-
95.1261	4.57514	2.0476	2.23439				ENSMUSG00000028691	12	Prdx1	protein_coding	ensembl_havana	chr4:116685544-116700822:+
95.0725	-2.15851	1.918	-1.1254	0.260422	0.457048	5.72755	ENSMUSG00000020152	7	Actr2	protein_coding	ensembl_havana	chr11:20062304-20112913:-
94.7315	-0.0890492	1.64347	-0.0541835	0.956789	0.908867	5.25398	ENSMUSG00000018363	16	Smurf2	protein_coding	ensembl_havana	chr11:106820066-106920715:-
94.6722	4.08048	1.9954	2.04494				ENSMUSG00000030342	8	Cd9	protein_coding	ensembl_havana	chr6:125460266-125494791:-
94.5886	-6.38663	2.03779	-3.13409				ENSMUSG00000022089	8	Bin3	protein_coding	ensembl	chr14:70100145-70138191:+
94.5792	4.17057	1.89546	2.20029				ENSMUSG00000064341	1	mt-Nd1	protein_coding	insdc	chrM:2751-3707:+
94.5418	4.59171	1.97875	2.32051	0.0203131	0.149878	5.25398	ENSMUSG00000006998	15	Psmd2	protein_coding	ensembl_havana	chr16:20651652-20663414:+
94.2498	3.1034	1.85335	1.67448				ENSMUSG00000025234	11	Arih1	protein_coding	ensembl_havana	chr9:59388258-59486618:-
94.1465	4.57527	2.00002	2.28761	0.0221605	0.149878	5.72755	ENSMUSG00000014867	9	Surf4	protein_coding	ensembl_havana	chr2:26920040-26933928:-
93.8654	1.53076	1.65291	0.926098				ENSMUSG00000017707	9	Serinc3	protein_coding	ensembl_havana	chr2:163623272-163645131:-
93.4228	-0.645674	1.69081	-0.381874	0.702555	0.844673	4.5	ENSMUSG00000057110	15	Cntrl	protein_coding	ensembl_havana	chr2:35109492-35178822:+
93.3527	-0.614637	1.61031	-0.381689	0.702692	0.792926	5.25398	ENSMUSG00000029169	11	Dhx15	protein_coding	ensembl_havana	chr5:52150203-52190514:-
93.3379	-3.16246	1.92375	-1.64391				ENSMUSG00000058427	10	Cxcl2	protein_coding	ensembl_havana	chr5:90903871-90905938:+
93.3349	0.319686	1.70409	0.187599	0.851191	0.92849	4.5	ENSMUSG00000046330	10	Rpl37a	protein_coding	ensembl_havana	chr1:72711290-72713813:+
93.3026	3.99028	2.1329	1.87083				ENSMUSG00000024081	8	Cebpz	protein_coding	ensembl	chr17:78919006-78937070:-
92.9356	-7.33338	2.38406	-3.076				ENSMUSG00000074829	10	2010315B03Rik	protein_coding	ensembl_havana	chr9:124291804-124312696:-
92.9109	-4.27424	1.53896	-2.77736	0.00548027	0.0883601	4.5	ENSMUSG00000026483	13	Fam129a	protein_coding	ensembl_havana	chr1:151571186-151721939:+
92.8425	1.4312	1.71239	0.835794				ENSMUSG00000031627	9	Irf2	protein_coding	ensembl_havana	chr8:46739732-46847458:+
92.832	-2.1327	1.65165	-1.29126	0.196615	0.449151	4.5	ENSMUSG00000052459	13	Atp6v1a	protein_coding	ensembl_havana	chr16:44085402-44139705:-
92.8122	2.76047	1.76744	1.56184	0.118325	0.339831	4.5	ENSMUSG00000036275	13	9530068E07Rik	protein_coding	ensembl_havana	chr11:52396428-52408728:+
92.6458	-2.26259	1.5858	-1.42678	0.153642	0.396393	4.5	ENSMUSG00000028530	14	Jak1	protein_coding	ensembl_havana	chr4:101152367-101265282:-
92.6363	1.58197	1.96672	0.80437				ENSMUSG00000034422	14	Parp14	protein_coding	ensembl_havana	chr16:35832874-35871544:-
92.6075	-3.86918	1.70423	-2.27034	0.0231869	0.173538	4.5	ENSMUSG00000042625	16	Safb2	protein_coding	ensembl_havana	chr17:56560965-56584585:-
92.5827	-6.68225	1.96867	-3.3943				ENSMUSG00000061458	8	Nol10	protein_coding	ensembl	chr12:17348458-17430094:+
92.3078	-1.51822	1.78343	-0.851296	0.394605	0.590194	5.25398	ENSMUSG00000039989	7	Cbx4	protein_coding	ensembl_havana	chr11:119077573-119086221:-
91.9767	0.757358	1.62476	0.466134	0.641119	0.817454	4.5	ENSMUSG00000015656	17	Hspa8	protein_coding	ensembl_havana	chr9:40800984-40810087:+
91.9362	4.68772	2.07361	2.26065				ENSMUSG00000025041	16	Nt5c2	protein_coding	ensembl_havana	chr19:46886831-47015153:-
91.9161	-1.62786	1.42501	-1.14235	0.253309	0.450908	5.72755	ENSMUSG00000018395	19	Kif3a	protein_coding	ensembl_havana	chr11:53567379-53601967:+
91.9133	1.56009	1.75054	0.891206	0.372819	0.574494	5.25398	ENSMUSG00000025907	14	Rb1cc1	protein_coding	ensembl_havana	chr1:6206197-6276648:+
91.8987	-2.48664	1.97022	-1.26211	0.206909	0.459928	4.5	ENSMUSG00000019432	15	Ddx39b	protein_coding	ensembl_havana	chr17:35241746-35253707:+
91.6361	-4.25727	2.17114	-1.96084	0.0498973	0.213529	5.72755	ENSMUSG00000034311	3	Kif4	protein_coding	ensembl_havana	chrX:100625737-100727214:+
91.4385	1.49712	1.6384	0.913768	0.360839	0.611192	4.5	ENSMUSG00000046245	13	Pilra	protein_coding	ensembl_havana	chr5:137821952-137836281:-
91.3928	-1.29782	1.54003	-0.842719	0.399386	0.642994	4.5	ENSMUSG00000043740	14	B430306N03Rik	protein_coding	ensembl_havana	chr17:48316141-48327024:+
91.3291	4.36754	2.4523	1.781				ENSMUSG00000023988	8	Bysl	protein_coding	ensembl	chr17:47599331-47611492:-
91.0653	4.40383	2.022	2.17796				ENSMUSG00000029621	14	Arpc1a	protein_coding	ensembl_havana	chr5:145083830-145108761:+
90.8716	5.35528	2.18551	2.45036	0.0142715	0.134227	4.5	ENSMUSG00000021460	16	Auh	protein_coding	ensembl_havana	chr13:52835119-52929681:-
90.8089	6.39557	2.32105	2.75546				ENSMUSG00000087370	2	Tmem170b	protein_coding	ensembl	chr13:41606216-41641347:+
90.4045	4.21014	2.30581	1.82588				ENSMUSG00000064080	12	Fbln2	protein_coding	ensembl_havana	chr6:91212455-91272540:+
90.2514	4.32986	2.34948	1.84291				ENSMUSG00000049265	7	Kcnk3	protein_coding	ensembl_havana	chr5:30588170-30625271:+
90.1832	0.0863617	1.95116	0.0442618				ENSMUSG00000035851	14	Ythdc1	protein_coding	ensembl_havana	chr5:86804221-86836659:+
90.165	1.82971	2.00311	0.913438	0.361012	0.545545	5.72755	ENSMUSG00000036241	3	Ube2r2	protein_coding	ensembl_havana	chr4:41135743-41193380:+
90.0144	3.22897	1.90763	1.69266				ENSMUSG00000055302	5	Mrfap1	protein_coding	ensembl_havana	chr5:36794867-36796772:-
89.9478	1.95085	2.18485	0.892895				ENSMUSG00000035493	9	Tgfbi	protein_coding	ensembl	chr13:56609603-56639339:+
89.925	7.38918	2.61413	2.82663				ENSMUSG00000044950	7	Pwwp2a	protein_coding	ensembl_havana	chr11:43681998-43721491:+
89.7171	3.19198	2.05498	1.55329				ENSMUSG00000009207	15	Lnpk1	protein_coding	ensembl_havana	chr2:74520291-74579435:-
89.6963	-5.90686	1.91325	-3.08734				ENSMUSG00000034810	7	Scn7a	protein_coding	ensembl_havana	chr2:66673425-66784914:-
89.6688	0.818504	1.7931	0.456474	0.648049	0.730492	5.72755	ENSMUSG00000009633	3	G0s2	protein_coding	ensembl_havana	chr1:193272161-193273217:-
89.5125	0.461572	1.91566	0.240947				ENSMUSG00000048534	7	Amica1	protein_coding	ensembl_havana	chr9:45079183-45108534:+
89.3413	-5.42476	1.7895	-3.03144				ENSMUSG00000039501	14	Znfx1	protein_coding	ensembl_havana	chr2:167035793-167063015:-
89.1738	3.2246	1.88095	1.71435				ENSMUSG00000067235	14	H2-Q10	protein_coding	ensembl_havana	chr17:35470089-35474563:+
89.1591	-4.72527	2.00621	-2.35532				ENSMUSG00000031292	14	Cdkl5	protein_coding	ensembl_havana	chrX:160771923-160994704:-
89.1152	-2.09508	1.73982	-1.20419	0.228515	0.484983	4.5	ENSMUSG00000026073	13	Il1r2	protein_coding	ensembl_havana	chr1:40074079-40125231:+
88.8836	4.90141	2.26667	2.16238				ENSMUSG00000016481	15	Cr1l	protein_coding	ensembl_havana	chr1:195097382-195131586:-
88.8454	4.90549	2.05542	2.38662	0.0170042	0.1481	4.5	ENSMUSG00000038368	16	Focad	protein_coding	ensembl_havana	chr4:88094629-88411011:+
88.5839	3.6616	1.73107	2.11522	0.0344112	0.201309	4.5	ENSMUSG00000022051	15	Bnip3l	protein_coding	ensembl_havana	chr14:66985239-67008877:-
88.481	5.19889	1.79553	2.89546	0.00378606	0.0763113	5.72755	ENSMUSG00000075324	13	Fign	protein_coding	ensembl_havana	chr2:63971507-64098038:-
88.4272	0.667362	1.61345	0.413626	0.679148	0.742384	5.72755	ENSMUSG00000057098	14	Ebf1	protein_coding	ensembl_havana	chr11:44617317-45008091:+
88.3012	2.96751	1.99634	1.48647	0.137154	0.338604	5.25398	ENSMUSG00000063972	13	Nr6a1	protein_coding	ensembl_havana	chr2:38723370-38927688:-
88.2841	1.32136	1.79952	0.734284	0.462775	0.692734	4.5	ENSMUSG00000039967	14	Zfp292	protein_coding	ensembl_havana	chr4:34803113-34882960:-
88.2639	3.25997	1.81282	1.79829				ENSMUSG00000022193	6	Psmb5	protein_coding	ensembl	chr14:54614120-54617995:-
88.0003	0.976903	1.74201	0.56079	0.57494	0.774827	4.5	ENSMUSG00000047945	6	Marcksl1	protein_coding	ensembl_havana	chr4:129513581-129515985:+
87.9797	5.1387	2.23157	2.30273	0.0212939	0.166189	4.5	ENSMUSG00000087687	3	Pet100	protein_coding	ensembl_havana	chr8:3621548-3625848:+
87.9477	2.78955	1.8733	1.48912	0.136457	0.373019	4.5	ENSMUSG00000029422	14	Rsrc2	protein_coding	ensembl_havana	chr5:123728426-123749414:-
87.7387	-2.19798	2.24147	-0.980599				ENSMUSG00000027180	12	Fbxo3	protein_coding	ensembl_havana	chr2:104027721-104063240:+
87.5943	-6.41018	1.87862	-3.41218				ENSMUSG00000031154	15	Otud5	protein_coding	ensembl_havana	chrX:7841364-7876626:+
87.4622	-2.28609	1.62026	-1.41094	0.158262	0.400566	4.5	ENSMUSG00000024576	14	Csnk1a1	protein_coding	ensembl_havana	chr18:61555274-61590061:+
87.4392	4.49362	2.17412	2.06687				ENSMUSG00000042417	4	Ccno	protein_coding	ensembl	chr13:112987802-112990778:+
87.1459	8.02848	2.65046	3.02909	0.00245293	0.0763113	4.5	ENSMUSG00000000088	7	Cox5a	protein_coding	ensembl_havana	chr9:57521274-57532426:+
87.0721	1.04321	1.65842	0.629036	0.529325	0.740367	4.5	ENSMUSG00000060802	8	B2m	protein_coding	ensembl_havana	chr2:122147686-122153083:+
87.0532	1.58034	2.03756	0.775606				ENSMUSG00000079808	3	AC168977.1	protein_coding	ensembl	chr1_GL456212_random:128555-150452:-
86.9627	2.1501	2.16021	0.99532	0.319581	0.574494	4.5	ENSMUSG00000051853	9	Arf3	protein_coding	ensembl_havana	chr15:98737621-98763214:-
86.8471	-0.837596	2.46379	-0.339962				ENSMUSG00000033885	14	Pxk	protein_coding	ensembl	chr14:8098213-8165111:+
86.8248	-2.52707	1.81778	-1.3902				ENSMUSG00000050812	18	AI314180	protein_coding	ensembl_havana	chr4:58798911-58912749:-
86.8097	-10.2844	2.28247	-4.50583				ENSMUSG00000042268	10	Slc26a9	protein_coding	ensembl_havana	chr1:131744022-131771504:+
86.776	-8.5086	2.27343	-3.74263				ENSMUSG00000054715	11	Zscan22	protein_coding	ensembl_havana	chr7:12897815-12909083:+
86.67	7.47858	2.31737	3.22719				ENSMUSG00000061911	14	Myt1l	protein_coding	ensembl	chr12:29528384-29923209:+
86.6059	-6.72074	2.22893	-3.01522				ENSMUSG00000004508	6	Gab2	protein_coding	ensembl_havana	chr7:97081586-97308946:+
86.6041	-6.24267	2.23292	-2.79574				ENSMUSG00000038843	17	Gcnt1	protein_coding	ensembl_havana	chr19:17326141-17356667:-
86.5417	-0.31754	2.07135	-0.153301	0.878161	0.94397	4.5	ENSMUSG00000024012	17	Mtch1	protein_coding	ensembl_havana	chr17:29332072-29347904:-
86.5407	-1.9698	2.08303	-0.945644				ENSMUSG00000021959	15	Lats2	protein_coding	ensembl_havana	chr14:57642077-57758388:-
86.4297	1.79177	2.09979	0.853309	0.393488	0.6377	4.5	ENSMUSG00000020936	8	Nmt1	protein_coding	ensembl_havana	chr11:103028190-103068912:+
86.3502	-2.03334	2.10473	-0.966082	0.334003	0.547074	5.25398	ENSMUSG00000059883	16	Irak4	protein_coding	ensembl_havana	chr15:94543643-94581815:+
86.1418	2.52	2.01826	1.2486	0.21181	0.46593	4.5	ENSMUSG00000028273	15	Pdlim5	protein_coding	ensembl_havana	chr3:142239590-142395696:-
86.1388	3.85735	1.90047	2.02968				ENSMUSG00000053158	10	Fes	protein_coding	ensembl_havana	chr7:80377756-80387946:-
86.048	4.40448	1.57617	2.79442	0.00519923	0.0883601	4.5	ENSMUSG00000063229	15	Ldha	protein_coding	ensembl_havana	chr7:46841475-46855627:+
85.8258	-9.96612	2.31312	-4.30851				ENSMUSG00000079679	3	Vwde	protein_coding	ensembl_havana	chr6:13156299-13224965:-
85.7278	1.15402	1.71903	0.671321	0.502016	0.72483	4.5	ENSMUSG00000022314	9	Rad21	protein_coding	ensembl	chr15:51962605-51991760:-
85.59	-2.28722	2.14233	-1.06763	0.285686	0.546996	4.5	ENSMUSG00000025804	5	Ccr1	protein_coding	ensembl_havana	chr9:123962124-123968692:-
85.5826	4.27815	2.30623	1.85504	0.0635908	0.240348	5.25398	ENSMUSG00000002428	12	Hltf	protein_coding	ensembl_havana	chr3:20057811-20118490:+
85.5507	0.540728	1.98861	0.271912	0.785689	0.889415	4.5	ENSMUSG00000026664	7	Phyh	protein_coding	ensembl_havana	chr2:4919019-4938730:+
85.3901	4.90053	2.18366	2.24418				ENSMUSG00000015176	9	Nolc1	protein_coding	ensembl	chr19:46075863-46085528:+
85.2084	0.251522	2.32089	0.108373				ENSMUSG00000038520	15	Tbc1d17	protein_coding	ensembl_havana	chr7:44834623-44849079:-
85.2032	2.30202	1.52945	1.50513				ENSMUSG00000020275	9	Rel	protein_coding	ensembl_havana	chr11:23736847-23770970:-
85.1724	-1.58086	1.76855	-0.893874	0.371389	0.619475	4.5	ENSMUSG00000025492	6	Ifitm3	protein_coding	ensembl_havana	chr7:141009586-141010770:-
85.1684	-0.836237	1.77553	-0.47098	0.637655	0.723678	5.72755	ENSMUSG00000052331	14	Ankrd44	protein_coding	ensembl_havana	chr1:54645340-54926387:-
85.1347	0.135445	1.62799	0.0831981	0.933694	0.975078	4.5	ENSMUSG00000028309	14	Rnf20	protein_coding	ensembl_havana	chr4:49632006-49656887:+
84.968	3.71667	2.28757	1.62472				ENSMUSG00000031486	15	Adgra2	protein_coding	ensembl_havana	chr8:27085583-27123436:+
84.9202	3.60433	2.38267	1.51273				ENSMUSG00000042148	8	Cox10	protein_coding	ensembl_havana	chr11:63962627-64079468:-
84.7655	0.287641	1.82683	0.157454				ENSMUSG00000019302	16	Atp6v0a1	protein_coding	ensembl_havana	chr11:101009452-101063719:+
84.7434	-3.55732	2.31689	-1.53539				ENSMUSG00000025283	15	Sat1	protein_coding	ensembl_havana	chrX:155213132-155216449:-
84.5993	0.785484	1.74617	0.449832	0.652831	0.823722	4.5	ENSMUSG00000025026	14	Add3	protein_coding	ensembl	chr19:53140445-53247399:+
84.478	-3.51081	1.86638	-1.88108	0.0599607	0.229511	5.72755	ENSMUSG00000038976	12	Ppp1r9b	protein_coding	ensembl_havana	chr11:94991035-95006899:+
84.4549	0.785607	2.13069	0.368709				ENSMUSG00000071562	5	Stfa1	protein_coding	ensembl	chr16:36277148-36285371:+
84.3907	1.64497	1.77205	0.928289	0.353258	0.605394	4.5	ENSMUSG00000000134	17	Tfe3	protein_coding	ensembl_havana	chrX:7762560-7775202:+
84.2605	1.91486	1.62633	1.17741	0.239032	0.495833	4.5	ENSMUSG00000029484	12	Anxa3	protein_coding	ensembl_havana	chr5:96793339-96845966:+
83.9879	4.72682	1.95987	2.4118				ENSMUSG00000016921	14	Srsf6	protein_coding	ensembl_havana	chr2:162931528-162937121:+
83.9833	-2.89249	2.04796	-1.41238				ENSMUSG00000028793	15	Rnf19b	protein_coding	ensembl_havana	chr4:129058271-129085886:+
83.8732	4.89578	1.84551	2.65281				ENSMUSG00000018412	16	Kansl1	protein_coding	ensembl_havana	chr11:104333229-104468861:-
83.8312	7.42769	2.3378	3.17722				ENSMUSG00000030074	9	Gxylt2	protein_coding	ensembl_havana	chr6:100704734-100810913:+
83.7609	-0.04266	1.90436	-0.0224013	0.982128	1	4.5	ENSMUSG00000001632	16	Brpf1	protein_coding	ensembl_havana	chr6:113307137-113324860:+
83.5803	-1.78712	1.49515	-1.19528				ENSMUSG00000055013	15	Agap1	protein_coding	ensembl_havana	chr1:89454806-89897617:+
83.5334	2.53967	1.93539	1.31223	0.189444	0.406148	5.25398	ENSMUSG00000042410	15	Agps	protein_coding	ensembl_havana	chr2:75832177-75931350:+
83.4734	-1.22618	1.5155	-0.809093	0.418462	0.653822	4.5	ENSMUSG00000060336	6	Zfp937	protein_coding	ensembl_havana	chr2:150218073-150240725:+
83.3374	-4.22971	2.32018	-1.82301	0.068302	0.266206	4.5	ENSMUSG00000061759	15	Armt1	protein_coding	ensembl_havana	chr10:4432467-4455141:+
83.0259	-3.66915	1.43701	-2.55333	0.0106699	0.109542	5.25398	ENSMUSG00000039782	14	Cpeb2	protein_coding	ensembl_havana	chr5:43233170-43289724:+
82.9774	-11.533	2.64194	-4.36536				ENSMUSG00000009214	9	Tmem8c	protein_coding	ensembl_havana	chr2:27061636-27072179:-
82.5343	-3.54014	1.89145	-1.87165				ENSMUSG00000025330	6	Padi4	protein_coding	ensembl_havana	chr4:140745865-140774236:-
82.4531	0.424532	1.8709	0.226913				ENSMUSG00000025860	14	Xiap	protein_coding	ensembl_havana	chrX:42059679-42109656:+
82.4501	-4.15428	1.88081	-2.20877				ENSMUSG00000038039	13	Gcc2	protein_coding	ensembl_havana	chr10:58255497-58305599:+
82.3247	-6.68864	1.81092	-3.6935	0.000221191	0.0529872	5.25398	ENSMUSG00000029334	14	Prkg2	protein_coding	ensembl_havana	chr5:98929773-99037351:-
82.2488	2.75627	1.94772	1.41513				ENSMUSG00000031010	17	Usp9x	protein_coding	ensembl_havana	chrX:13071498-13173328:+
82.0491	0.913312	2.14788	0.425216	0.670679	0.828202	4.5	ENSMUSG00000002778	14	Kdelr1	protein_coding	ensembl_havana	chr7:45872772-45883732:+
81.8582	-0.644314	1.58847	-0.405619				ENSMUSG00000018476	7	Kdm6b	protein_coding	ensembl_havana	chr11:69398508-69413675:-
81.6763	4.34177	2.39356	1.81394				ENSMUSG00000045659	18	Plekha7	protein_coding	ensembl_havana	chr7:116123485-116308376:-
81.6496	-1.59984	1.67531	-0.954954	0.339601	0.591173	4.5	ENSMUSG00000035248	8	Zcchc6	protein_coding	ensembl	chr13:59771879-59823147:-
81.6097	22.9752	2.7466	8.36496				ENSMUSG00000052013	14	Btla	protein_coding	ensembl_havana	chr16:45224315-45252895:+
81.5064	-0.370518	1.82257	-0.203294	0.838906	0.92036	4.5	ENSMUSG00000018654	17	Ikzf1	protein_coding	ensembl_havana	chr11:11685003-11772926:+
81.357	-3.34181	1.76056	-1.89815	0.0576769	0.247519	4.5	ENSMUSG00000028431	11	Ikbkap	protein_coding	ensembl_havana	chr4:56749680-56802331:-
81.3384	-0.0384969	1.94996	-0.0197424	0.984249	1	4.5	ENSMUSG00000031701	6	Dnaja2	protein_coding	ensembl_havana	chr8:85537633-85555344:-
81.3296	-3.43981	2.23293	-1.54049				ENSMUSG00000031059	9	Ndufb11	protein_coding	ensembl_havana	chrX:20615326-20617619:-
81.3204	3.94167	2.21258	1.78148				ENSMUSG00000017760	15	Ctsa	protein_coding	ensembl_havana	chr2:164832873-164841032:+
81.2057	3.52171	2.20341	1.5983				ENSMUSG00000075254	11	Heg1	protein_coding	ensembl_havana	chr16:33684466-33771576:+
81.1017	7.38391	2.55356	2.89162				ENSMUSG00000031893	7	Tsnaxip1	protein_coding	ensembl_havana	chr8:105827731-105844680:+
81.0989	-0.453833	1.64467	-0.275942	0.782592	0.88811	4.5	ENSMUSG00000004980	16	Hnrnpa2b1	protein_coding	ensembl_havana	chr6:51460932-51469894:-
80.9635	1.91237	1.82203	1.04958	0.293909	0.512899	5.25398	ENSMUSG00000047126	17	Cltc	protein_coding	ensembl_havana	chr11:86694351-86757565:-
80.7989	1.69457	1.76032	0.962646	0.335725	0.526622	5.72755	ENSMUSG00000022876	17	Samsn1	protein_coding	ensembl_havana	chr16:75858793-76022270:-
80.5716	-0.201238	2.82606	-0.0712077				ENSMUSG00000025872	5	Thoc3	protein_coding	ensembl_havana	chr13:54458837-54468849:-
80.3072	5.06962	2.03562	2.49045				ENSMUSG00000028312	19	Smc2	protein_coding	ensembl_havana	chr4:52439243-52488260:+
80.1559	7.00225	2.31898	3.01953	0.00253164	0.0763113	4.5	ENSMUSG00000078453	2	Abracl	protein_coding	ensembl	chr10:18011263-18023252:-
80.0293	-1.53433	2.08705	-0.735167	0.462238	0.692379	4.5	ENSMUSG00000030738	11	Eif3c	protein_coding	ensembl_havana	chr7:126546455-126566411:-
79.8275	-4.28411	1.5631	-2.74079				ENSMUSG00000033671	18	Cep350	protein_coding	ensembl_havana	chr1:155844964-155973255:-
79.7762	-0.259769	1.73002	-0.150154	0.880643	0.837889	5.72755	ENSMUSG00000022450	5	Ndufa6	protein_coding	ensembl	chr15:82350139-82354291:-
79.6808	6.28783	2.45806	2.55805				ENSMUSG00000061393	14	Acvr2b	protein_coding	ensembl_havana	chr9:119402118-119434995:+
79.6428	8.49171	2.43498	3.48738				ENSMUSG00000026966	6	Ssna1	protein_coding	ensembl_havana	chr2:25271039-25272438:-
79.5314	-6.84777	1.58878	-4.31007	1.63205e-05	0.0172804	4.5	ENSMUSG00000027366	12	Sppl2a	protein_coding	ensembl_havana	chr2:126890391-126933235:-
79.4133	1.65778	1.57441	1.05295	0.292364	0.551143	4.5	ENSMUSG00000062328	7	Rpl17	protein_coding	ensembl	chr18:75000477-75003381:+
79.3061	2.1796	2.10262	1.03661				ENSMUSG00000039262	16	Prrc2b	protein_coding	ensembl_havana	chr2:32151082-32234537:+
79.3044	1.45273	1.87799	0.773559				ENSMUSG00000059182	7	Skap2	protein_coding	ensembl_havana	chr6:51857422-52012549:-
79.2617	0.0869046	1.67947	0.0517452	0.958732	0.909435	5.25398	ENSMUSG00000036550	16	Cnot1	protein_coding	ensembl_havana	chr8:95719451-95807464:-
79.2508	7.11536	2.44769	2.90698				ENSMUSG00000042680	7	Garem1	protein_coding	ensembl	chr18:21127201-21300138:-
79.1761	-2.13981	2.02825	-1.055				ENSMUSG00000053641	9	Dennd4a	protein_coding	ensembl_havana	chr9:64811340-64919667:+
79.1646	-4.69082	1.67326	-2.8034	0.00505675	0.0869686	4.5	ENSMUSG00000044948	16	Cfap43	protein_coding	ensembl_havana	chr19:47737561-47919299:-
79.1475	4.02865	1.69621	2.3751	0.0175443	0.150211	4.5	ENSMUSG00000041354	15	Rgl2	protein_coding	ensembl_havana	chr17:33929543-33937687:+
79.1328	5.69616	2.41892	2.35484				ENSMUSG00000059397	2	Olfr54	protein_coding	ensembl_havana	chr11:51014236-51031578:+
79.0299	4.19455	2.10821	1.98963				ENSMUSG00000028893	8	Sesn2	protein_coding	ensembl_havana	chr4:132492032-132510501:-
78.7656	3.2951	1.65896	1.98625				ENSMUSG00000040433	16	Zbtb38	protein_coding	ensembl_havana	chr9:96682770-96752831:-
78.7503	-2.3231	1.85295	-1.25373	0.209939	0.431065	5.25398	ENSMUSG00000026126	15	Ptpn18	protein_coding	ensembl_havana	chr1:34459762-34475733:+
78.7178	2.81055	1.76142	1.59561	0.110575	0.327414	4.5	ENSMUSG00000035697	14	Hmha1	protein_coding	ensembl_havana	chr10:80016653-80031472:+
78.6565	1.4161	2.0036	0.706778	0.479704	0.648668	5.25398	ENSMUSG00000022663	3	Atg3	protein_coding	ensembl_havana	chr16:45158785-45188538:+
78.5992	3.28341	1.59905	2.05335	0.0400382	0.19584	5.72755	ENSMUSG00000032231	14	Anxa2	protein_coding	ensembl_havana	chr9:69453620-69491795:+
78.5588	2.79186	1.53651	1.81702	0.0692148	0.26644	4.5	ENSMUSG00000038463	8	Olfml2b	protein_coding	ensembl_havana	chr1:170644532-170682789:+
78.5408	-0.221242	1.74325	-0.126913	0.899009	0.846648	5.72755	ENSMUSG00000022124	14	Fbxl3	protein_coding	ensembl_havana	chr14:103080239-103099566:-
78.473	0.263774	2.31098	0.114139				ENSMUSG00000031196	13	F8	protein_coding	ensembl_havana	chrX:75172715-75382615:-
78.4286	4.15122	1.72858	2.40153	0.0163269	0.131017	5.72755	ENSMUSG00000000290	13	Itgb2	protein_coding	ensembl_havana	chr10:77530252-77565708:+
78.3256	3.14643	2.1121	1.48972				ENSMUSG00000032187	16	Smarca4	protein_coding	ensembl_havana	chr9:21616169-21704230:+
78.2775	-0.902585	1.98566	-0.454552	0.649432	0.823092	4.5	ENSMUSG00000001833	17	Sept7	protein_coding	ensembl_havana	chr9:25252439-25308571:+
78.2721	-5.78106	2.01417	-2.8702	0.00410208	0.0806986	4.5	ENSMUSG00000026058	11	Khdrbs2	protein_coding	ensembl_havana	chr1:32172714-32658568:+
78.1873	1.93879	1.69835	1.14157	0.253632	0.515067	4.5	ENSMUSG00000034593	16	Myo5a	protein_coding	ensembl_havana	chr9:75071015-75223688:+
78.1485	-6.2585	2.21403	-2.82675				ENSMUSG00000026107	11	Nabp1	protein_coding	ensembl_havana	chr1:51465862-51478425:-
78.127	1.38993	1.78753	0.777569	0.436823	0.67096	4.5	ENSMUSG00000005779	12	Psmb4	protein_coding	ensembl_havana	chr3:94884093-94886961:-
78.0505	-0.715007	2.10229	-0.340108				ENSMUSG00000090213	1	Tmem189	protein_coding	ensembl_havana	chr2:167642608-167689822:-
78.0385	5.76886	2.25924	2.55346				ENSMUSG00000048617	16	Rtbdn	protein_coding	ensembl_havana	chr8:84946991-84956603:+
78.0026	0.751643	1.77897	0.422516	0.672648	0.829057	4.5	ENSMUSG00000023977	14	Ubr2	protein_coding	ensembl	chr17:46928292-47010532:-
77.9945	-7.60002	2.23614	-3.39873				ENSMUSG00000059423	13	Zfp933	protein_coding	ensembl_havana	chr4:147822986-147848366:-
77.9402	0.540038	2.24777	0.240255				ENSMUSG00000025139	14	Tollip	protein_coding	ensembl_havana	chr7:141874813-141918507:-
77.8539	-3.69509	2.08366	-1.77336	0.0761685	0.274744	4.5	ENSMUSG00000022861	16	Dgkg	protein_coding	ensembl_havana	chr16:22468461-22657221:-
77.7916	2.7477	1.99315	1.37857	0.168028	0.413425	4.5	ENSMUSG00000059070	16	Rpl18	protein_coding	ensembl_havana	chr7:45715457-45720836:+
77.7252	2.72803	1.64406	1.65933	0.0970502	0.283909	5.25398	ENSMUSG00000066037	14	Hnrnpr	protein_coding	ensembl_havana	chr4:136310942-136359447:+
77.62	-1.41142	1.54133	-0.915719	0.359814	0.610775	4.5	ENSMUSG00000038056	15	Kmt2c	protein_coding	ensembl_havana	chr5:25271798-25498783:-
77.551	-8.55524	2.60654	-3.28223				ENSMUSG00000028107	14	Tars2	protein_coding	ensembl_havana	chr3:95739976-95760206:-
77.4656	2.70641	1.90003	1.4244	0.15433	0.365105	5.25398	ENSMUSG00000001687	15	Ubl3	protein_coding	ensembl_havana	chr5:148504635-148552789:-
77.4126	3.20524	1.89198	1.69413	0.0902415	0.295801	4.5	ENSMUSG00000021027	15	Ralgapa1	protein_coding	ensembl	chr12:55602929-55821167:-
77.308	2.39372	1.80792	1.32402	0.185497	0.385136	5.72755	ENSMUSG00000038375	15	Trp53inp2	protein_coding	ensembl_havana	chr2:155381059-155389850:+
77.2413	-2.44418	1.53207	-1.59535				ENSMUSG00000063273	11	Naa15	protein_coding	ensembl_havana	chr3:51415148-51476507:+
77.2385	-8.41384	2.4706	-3.40558				ENSMUSG00000039660	16	Spout1	protein_coding	ensembl_havana	chr2:30173453-30178459:-
77.1894	1.82095	1.99716	0.911769	0.361891	0.546043	5.72755	ENSMUSG00000025220	7	Mgea5	protein_coding	ensembl	chr19:45750261-45783520:-
77.0373	-0.106111	1.71821	-0.0617567	0.950757	0.984684	4.5	ENSMUSG00000091337	3	Eid1	protein_coding	ensembl_havana	chr2:125673095-125674785:+
77.0082	2.79699	2.30442	1.21375				ENSMUSG00000032179	7	Bmp5	protein_coding	ensembl_havana	chr9:75775364-75900310:+
76.9083	-0.203782	1.58524	-0.128549	0.897714	0.952418	4.5	ENSMUSG00000028522	16	Mier1	protein_coding	ensembl_havana	chr4:103114390-103165754:+
76.8768	0.54869	1.60725	0.341384	0.732815	0.859833	4.5	ENSMUSG00000026034	17	Clk1	protein_coding	ensembl_havana	chr1:58410189-58424066:-
76.7956	-1.59264	1.69282	-0.940821	0.346797	0.598681	4.5	ENSMUSG00000032590	14	Apeh	protein_coding	ensembl_havana	chr9:108085413-108094606:-
76.7146	3.43357	1.78967	1.91854				ENSMUSG00000032745	17	Gpbp1	protein_coding	ensembl_havana	chr13:111425680-111490111:-
76.501	-1.20827	2.42494	-0.498267				ENSMUSG00000018286	6	Psmb6	protein_coding	ensembl_havana	chr11:70525367-70527858:+
76.3667	-3.00147	2.02595	-1.48151				ENSMUSG00000060733	13	Ipmk	protein_coding	ensembl_havana	chr10:71347763-71433327:+
76.2613	0.77351	1.46611	0.527594	0.597781	0.791095	4.5	ENSMUSG00000026430	16	Rassf5	protein_coding	ensembl_havana	chr1:131176410-131245258:-
76.2222	1.25255	1.59961	0.783036	0.433606	0.591976	5.72755	ENSMUSG00000040054	15	Baz2a	protein_coding	ensembl	chr10:128092783-128129303:+
76.2045	7.52617	2.48642	3.0269				ENSMUSG00000057440	7	Mpp7	protein_coding	ensembl	chr18:7347962-7626863:-
76.0743	1.24711	1.82781	0.682297	0.495051	0.719681	4.5	ENSMUSG00000015027	11	Galns	protein_coding	ensembl_havana	chr8:122578242-122611463:-
76.0306	-3.57355	1.63541	-2.18511	0.028881	0.172584	5.72755	ENSMUSG00000027566	14	Psma7	protein_coding	ensembl_havana	chr2:180036373-180042433:-
75.8858	-4.14717	1.82591	-2.27129				ENSMUSG00000033777	3	Tlr13	protein_coding	ensembl_havana	chrX:106143204-106160493:+
75.8133	1.93339	1.948	0.9925				ENSMUSG00000029148	15	Nrbp1	protein_coding	ensembl_havana	chr5:31240864-31251566:+
75.7835	22.8634	2.91016	7.85639				ENSMUSG00000049285	4	Mblac1	protein_coding	ensembl_havana	chr5:138194314-138195621:+
75.7084	0.718401	2.13585	0.336354	0.736604	0.86159	4.5	ENSMUSG00000042790	16	Rnf214	protein_coding	ensembl_havana	chr9:45863425-45906911:-
75.5025	2.09055	2.16341	0.966322	0.333883	0.547074	5.25398	ENSMUSG00000002015	5	Bcap31	protein_coding	ensembl_havana	chrX:73686178-73716175:-
75.4982	2.73512	1.96946	1.38877	0.164902	0.360683	5.72755	ENSMUSG00000042396	10	Rbm7	protein_coding	ensembl_havana	chr9:48488701-48495299:-
75.4192	2.11548	1.63404	1.29463	0.195447	0.41254	5.25398	ENSMUSG00000026970	16	Rbms1	protein_coding	ensembl_havana	chr2:60750193-60963192:-
75.4127	1.09399	1.74147	0.6282	0.529873	0.685098	5.25398	ENSMUSG00000031103	12	Elf4	protein_coding	ensembl_havana	chrX:48411046-48463132:-
75.3981	-1.63236	1.89354	-0.862068				ENSMUSG00000021728	7	Emb	protein_coding	ensembl_havana	chr13:117220625-117274098:+
75.3152	2.08978	1.83475	1.139	0.254703	0.452421	5.72755	ENSMUSG00000073412	6	Lst1	protein_coding	ensembl_havana	chr17:35185095-35188439:-
75.2944	-2.21644	1.90435	-1.16388				ENSMUSG00000071076	6	Jund	protein_coding	ensembl_havana	chr8:70698949-70700616:+
75.2899	-0.149187	1.56747	-0.0951768				ENSMUSG00000033004	14	Mycbp2	protein_coding	ensembl_havana	chr14:103113411-103346814:-
75.2206	4.66352	2.0144	2.31509	0.0206078	0.165578	4.5	ENSMUSG00000029185	14	Fam114a1	protein_coding	ensembl_havana	chr5:64970071-65041886:+
75.219	-2.80542	2.34017	-1.19881	0.230602	0.486131	4.5	ENSMUSG00000019837	8	Gtf3c6	protein_coding	ensembl_havana	chr10:40247703-40258108:-
75.2016	7.82033	2.56956	3.04345	0.00233884	0.0727417	5.72755	ENSMUSG00000022757	18	Tfg	protein_coding	ensembl_havana	chr16:56690332-56717450:-
75.156	-6.36435	1.99247	-3.1942				ENSMUSG00000001062	18	Vps9d1	protein_coding	ensembl_havana	chr8:123242356-123254348:-
75.0318	-4.35705	1.80674	-2.41156	0.0158845	0.142593	4.5	ENSMUSG00000040430	18	Pitpnc1	protein_coding	ensembl_havana	chr11:107207892-107470699:-
74.9536	0.317256	1.71582	0.1849	0.853307	0.929577	4.5	ENSMUSG00000046223	10	Plaur	protein_coding	ensembl_havana	chr7:24462484-24475968:+
74.9229	4.81737	2.30106	2.09354				ENSMUSG00000028906	16	Epb41	protein_coding	ensembl_havana	chr4:131923413-132075321:-
74.8175	1.26962	1.83921	0.690307	0.490001	0.714957	4.5	ENSMUSG00000035011	15	Zbtb7a	protein_coding	ensembl_havana	chr10:81135220-81152995:+
74.8016	-4.89901	2.20134	-2.22546				ENSMUSG00000064329	13	Scn1a	protein_coding	ensembl_havana	chr2:66270778-66440840:-
74.7916	-0.159679	2.43569	-0.0655578				ENSMUSG00000079197	10	Psme2	protein_coding	ensembl_havana	chr14:55587441-55591113:-
74.7362	1.72008	1.96526	0.875242	0.381442	0.557077	5.72755	ENSMUSG00000007656	13	Arpp19	protein_coding	ensembl_havana	chr9:75037614-75060313:+
74.6537	0.0439292	1.79844	0.0244263	0.980513	1	4.5	ENSMUSG00000026202	13	Tuba4a	protein_coding	ensembl_havana	chr1:75214228-75219865:-
74.5601	-1.27151	1.74282	-0.72957	0.465653	0.642422	5.25398	ENSMUSG00000024002	16	Brd4	protein_coding	ensembl_havana	chr17:32196274-32284722:-
74.5584	1.14046	1.53349	0.743704	0.457056	0.610628	5.72755	ENSMUSG00000031320	9	Rps4x	protein_coding	ensembl_havana	chrX:102184941-102189394:-
74.4907	-2.33111	2.05408	-1.13487				ENSMUSG00000002455	14	Prpf6	protein_coding	ensembl_havana	chr2:181591868-181655660:+
74.4022	0.411777	2.03533	0.202314	0.839671	0.920665	4.5	ENSMUSG00000073982	11	Rhog	protein_coding	ensembl_havana	chr7:102239123-102256054:-
74.3783	5.57486	1.88039	2.96474	0.00302937	0.0763113	4.5	ENSMUSG00000057948	12	Unc13d	protein_coding	ensembl_havana	chr11:116062095-116077961:-
74.3741	2.16775	2.1258	1.01973				ENSMUSG00000056692	12	D17Wsu92e	protein_coding	ensembl_havana	chr17:27751232-27820558:-
74.0567	-0.457083	2.00922	-0.227493	0.82004	0.908867	4.5	ENSMUSG00000033128	8	Gga1	protein_coding	ensembl	chr15:78877190-78894585:+
74.0554	3.8983	1.69119	2.30505	0.0211635	0.165578	4.5	ENSMUSG00000067851	11	Arfgef1	protein_coding	ensembl_havana	chr1:10137571-10232670:-
74.0434	-0.832634	2.15386	-0.386577	0.69907	0.791136	5.25398	ENSMUSG00000044103	4	Il1f9	protein_coding	ensembl_havana	chr2:24186476-24193568:+
73.9373	-4.81169	1.73407	-2.77479	0.0055237	0.0883601	4.5	ENSMUSG00000063108	15	Zfp26	protein_coding	ensembl_havana	chr9:20428449-20460162:-
73.8887	3.75422	1.58145	2.3739	0.0176012	0.150294	4.5	ENSMUSG00000041268	17	Dmxl2	protein_coding	ensembl_havana	chr9:54365158-54501626:-
73.8491	-0.819095	2.05098	-0.399368				ENSMUSG00000015755	16	Tab2	protein_coding	ensembl_havana	chr10:7905653-7956230:-
73.7817	-0.910331	1.49795	-0.607719	0.543374	0.74929	4.5	ENSMUSG00000020255	8	D10Wsu102e	protein_coding	ensembl_havana	chr10:83360221-83488505:+
73.7809	-0.824512	1.69335	-0.486913	0.62632	0.745393	5.25398	ENSMUSG00000044600	14	Smim7	protein_coding	ensembl_havana	chr8:72565188-72571088:-
73.7311	0.838357	2.49087	0.336572				ENSMUSG00000061482	6	Hist1h4d	protein_coding	ensembl_havana	chr13:23581598-23581990:+
73.7285	-0.00221231	1.54391	-0.00143293	0.998857	0.930329	5.25398	ENSMUSG00000022812	13	Gsk3b	protein_coding	ensembl_havana	chr16:38089001-38246084:+
73.5826	5.38449	2.31338	2.32755				ENSMUSG00000005583	16	Mef2c	protein_coding	ensembl_havana	chr13:83504034-83667080:+
73.5012	2.94363	2.23301	1.31823	0.187425	0.439147	4.5	ENSMUSG00000017210	14	Med24	protein_coding	ensembl_havana	chr11:98704591-98729435:-
73.4338	4.46086	1.88499	2.36652				ENSMUSG00000019773	7	Fbxo5	protein_coding	ensembl_havana	chr10:5799160-5805600:-
73.4168	-3.29019	2.18415	-1.50639				ENSMUSG00000032369	13	Plscr1	protein_coding	ensembl_havana	chr9:92249750-92272278:+
73.3879	-1.7762	1.46974	-1.20851	0.226851	0.44676	5.25398	ENSMUSG00000044820	6	AY074887	protein_coding	ensembl_havana	chr9:54950230-54950998:-
73.3493	1.27554	1.96596	0.648814	0.516459	0.734049	4.5	ENSMUSG00000056201	7	Cfl1	protein_coding	ensembl_havana	chr19:5490455-5495201:+
73.3029	0.442816	2.45979	0.180022				ENSMUSG00000032577	16	Mapkapk3	protein_coding	ensembl_havana	chr9:107254927-107289877:-
73.2719	1.63954	1.68284	0.97427				ENSMUSG00000024236	18	Svil	protein_coding	ensembl_havana	chr18:4920540-5119299:+
73.2308	2.99924	1.57114	1.90895	0.0562685	0.244515	4.5	ENSMUSG00000032280	16	Tle3	protein_coding	ensembl_havana	chr9:61372366-61418497:+
73.0919	-0.958081	1.54536	-0.619971	0.535277	0.656076	5.72755	ENSMUSG00000032097	10	Ddx6	protein_coding	ensembl_havana	chr9:44604892-44640731:+
73.0861	-1.30204	2.05734	-0.632877	0.526814	0.737829	4.5	ENSMUSG00000026254	17	Eif4e2	protein_coding	ensembl_havana	chr1:87213914-87240488:+
73.084	0.727137	1.91318	0.380068				ENSMUSG00000025261	17	Huwe1	protein_coding	ensembl_havana	chrX:151800807-151935417:+
73.0425	7.9388	2.56639	3.09337				ENSMUSG00000047446	18	Arl4a	protein_coding	ensembl_havana	chr12:40005447-40038025:-
73.0041	-0.684224	1.57247	-0.435128	0.66347	0.82719	4.5	ENSMUSG00000025326	12	Ube3a	protein_coding	ensembl_havana	chr7:59228750-59311536:+
72.8498	0.111111	1.49691	0.0742273	0.94083	0.979221	4.5	ENSMUSG00000059208	14	Hnrnpm	protein_coding	ensembl_havana	chr17:33646233-33686860:-
72.752	8.40813	2.60964	3.22195				ENSMUSG00000038473	14	Nos1ap	protein_coding	ensembl_havana	chr1:170302668-170589861:-
72.7509	4.73101	1.91388	2.47195				ENSMUSG00000009418	15	Nav1	protein_coding	ensembl_havana	chr1:135434580-135607295:-
72.747	-3.5202	1.58126	-2.2262	0.0260009	0.181895	4.5	ENSMUSG00000028668	5	Tceb3	protein_coding	ensembl_havana	chr4:136003368-136021763:-
72.6132	4.0411	1.87455	2.15577	0.0311017	0.194858	4.5	ENSMUSG00000029390	13	Tmed2	protein_coding	ensembl_havana	chr5:124540695-124550506:+
72.5685	4.80223	1.93275	2.48466	0.0129674	0.115961	5.72755	ENSMUSG00000047767	17	Atg16l2	protein_coding	ensembl_havana	chr7:101263034-101302251:-
72.5126	6.66068	2.29886	2.89739				ENSMUSG00000007833	15	Aldh16a1	protein_coding	ensembl_havana	chr7:45140684-45154584:-
72.5026	5.4476	2.06924	2.63266				ENSMUSG00000022311	15	Csmd3	protein_coding	ensembl_havana	chr15:47580637-48792063:-
72.2886	-1.61826	1.80149	-0.898287				ENSMUSG00000036273	15	Lrrk2	protein_coding	ensembl_havana	chr15:91673175-91816120:+
72.2775	3.31686	1.8794	1.76485				ENSMUSG00000037822	12	Smim14	protein_coding	ensembl_havana	chr5:65446844-65537184:-
72.2713	1.50353	1.69773	0.885613	0.375826	0.576691	5.25398	ENSMUSG00000024474	5	Ik	protein_coding	ensembl	chr18:36744656-36757639:+
72.2418	-0.296489	2.18694	-0.135573	0.892159	0.843831	5.72755	ENSMUSG00000038690	15	Atp5j2	protein_coding	ensembl_havana	chr5:145183698-145192062:-
72.2153	-4.791	2.25381	-2.12573				ENSMUSG00000031799	9	Tpm4	protein_coding	ensembl_havana	chr8:72134975-72153142:+
72.1972	1.65168	1.53341	1.07713				ENSMUSG00000045763	7	Basp1	protein_coding	ensembl	chr15:25363285-25413764:-
72.0191	3.33041	1.8299	1.82	0.0687595	0.26644	4.5	ENSMUSG00000052889	11	Prkcb	protein_coding	ensembl_havana	chr7:122288751-122634402:+
72.0125	3.73887	2.06877	1.80729	0.070717	0.267003	4.5	ENSMUSG00000033826	9	Dnah8	protein_coding	ensembl	chr17:30624354-30875264:+
71.7273	-2.2737	1.66143	-1.36852	0.17115	0.419805	4.5	ENSMUSG00000024758	14	Rtn3	protein_coding	ensembl	chr19:7425901-7483289:-
71.4751	2.2994	1.65158	1.39225	0.163848	0.359562	5.72755	ENSMUSG00000026353	9	Ubxn4	protein_coding	ensembl_havana	chr1:128243964-128279378:+
71.3895	-0.431151	1.82294	-0.236514	0.813034	0.905972	4.5	ENSMUSG00000028497	12	Hacd4	protein_coding	ensembl_havana	chr4:88396144-88438928:-
71.3672	1.29739	1.78182	0.728125	0.466537	0.615064	5.72755	ENSMUSG00000020358	17	Hnrnpab	protein_coding	ensembl_havana	chr11:51600100-51606847:-
70.9934	1.51966	2.10064	0.723429	0.469416	0.617555	5.72755	ENSMUSG00000034755	18	Pcdh11x	protein_coding	ensembl_havana	chrX:120290259-120910619:+
70.9325	-8.0237	2.17179	-3.69451				ENSMUSG00000036323	14	Srp72	protein_coding	ensembl_havana	chr5:76974683-76999937:+
70.8936	3.40294	1.72135	1.9769	0.048053	0.210393	5.72755	ENSMUSG00000024431	14	Nr3c1	protein_coding	ensembl_havana	chr18:39410545-39491301:-
70.8925	0.573084	1.77586	0.322708	0.746917	0.865259	4.5	ENSMUSG00000004897	16	Hdgf	protein_coding	ensembl_havana	chr3:87906321-87916132:+
70.8396	1.7603	1.71378	1.02714				ENSMUSG00000041890	17	Git2	protein_coding	ensembl_havana	chr5:114727407-114775517:-
70.7875	0.766932	1.5802	0.48534	0.627435	0.809375	4.5	ENSMUSG00000070544	6	Top1	protein_coding	ensembl_havana	chr2:160645888-160722764:+
70.7714	0.0641668	1.57241	0.040808	0.967449	0.915493	5.25398	ENSMUSG00000073702	11	Rpl31	protein_coding	ensembl_havana	chr1:39367842-39371911:+
70.6895	-1.68032	1.98377	-0.847032	0.396977	0.567026	5.72755	ENSMUSG00000024248	13	Cox7a2l	protein_coding	ensembl	chr17:83501919-83514333:-
70.6828	0.494622	1.88983	0.261728	0.793531	0.807119	5.72755	ENSMUSG00000021457	14	Syk	protein_coding	ensembl_havana	chr13:52583173-52648792:+
70.674	5.08559	1.99098	2.55432	0.0106396	0.119832	4.5	ENSMUSG00000025794	9	Rpl14	protein_coding	ensembl_havana	chr9:120571444-120574654:+
70.6357	-7.06478	2.4444	-2.89019				ENSMUSG00000045518	8	Onecut3	protein_coding	ensembl_havana	chr10:80494835-80517276:+
70.6211	2.49419	2.3043	1.0824	0.279073	0.541184	4.5	ENSMUSG00000003072	15	Atp5d	protein_coding	ensembl_havana	chr10:80138632-80145818:+
70.6072	2.41582	1.98984	1.21408				ENSMUSG00000022100	13	Xpo7	protein_coding	ensembl	chr14:70654246-70766628:-
70.5974	-0.449532	1.77238	-0.253631	0.79978	0.897371	4.5	ENSMUSG00000074748	3	Atxn7l3b	protein_coding	ensembl_havana	chr10:112925430-112929001:-
70.5661	0.348464	1.7807	0.19569				ENSMUSG00000039456	9	Morc3	protein_coding	ensembl_havana	chr16:93832121-93876072:+
70.4799	0.279718	1.41397	0.197824	0.843182	0.855564	5.25398	ENSMUSG00000034994	9	Eef2	protein_coding	ensembl	chr10:81176631-81182507:+
70.4534	-1.70569	2.14579	-0.7949				ENSMUSG00000052752	15	Traf7	protein_coding	ensembl_havana	chr17:24508562-24527938:-
70.4374	-4.253	2.11243	-2.01332	0.0440809	0.223675	4.5	ENSMUSG00000034152	5	Exoc3	protein_coding	ensembl	chr13:74169805-74208700:-
70.3005	2.72176	1.70176	1.59938				ENSMUSG00000020189	13	Osbpl8	protein_coding	ensembl	chr10:111164802-111297247:+
70.2821	4.23053	2.31758	1.82541	0.0679392	0.248101	5.25398	ENSMUSG00000021661	15	Ankra2	protein_coding	ensembl_havana	chr13:98263158-98274750:+
70.2682	-0.706052	2.00625	-0.351926				ENSMUSG00000025571	13	Tnrc6c	protein_coding	ensembl_havana	chr11:117654289-117763439:+
70.1754	2.91055	2.00337	1.45283	0.146271	0.385202	4.5	ENSMUSG00000027070	14	Lrp2	protein_coding	ensembl_havana	chr2:69424340-69586065:-
70.0759	0.0567556	1.62704	0.0348827	0.972173	0.918397	5.25398	ENSMUSG00000028088	14	Fmo5	protein_coding	ensembl_havana	chr3:97628804-97655282:+
69.9422	0.111937	1.94666	0.0575024	0.954145	0.985943	4.5	ENSMUSG00000031378	14	Abcd1	protein_coding	ensembl_havana	chrX:73716597-73738534:+
69.8928	3.08859	1.87722	1.6453	0.099908	0.278588	5.72755	ENSMUSG00000049550	17	Clip1	protein_coding	ensembl_havana	chr5:123577795-123684618:-
69.8783	1.45898	1.92332	0.758572				ENSMUSG00000021908	9	Gm6768	protein_coding	ensembl	chr12:119260934-119264272:+
69.8734	2.46038	1.79478	1.37085				ENSMUSG00000032691	14	Nlrp3	protein_coding	ensembl_havana	chr11:59541568-59566956:+
69.8271	5.8471	2.17243	2.6915				ENSMUSG00000024614	6	Tmx3	protein_coding	ensembl	chr18:90510154-90543267:+
69.8139	-7.143	2.16238	-3.30331				ENSMUSG00000054920	12	Klhl5	protein_coding	ensembl_havana	chr5:65107539-65168188:+
69.807	5.01831	1.59607	3.14416	0.00166566	0.066838	5.72755	ENSMUSG00000037058	14	Paip2	protein_coding	ensembl_havana	chr18:35598617-35617186:+
69.7452	3.57272	2.12505	1.68124	0.0927162	0.269369	5.72755	ENSMUSG00000033991	8	Ttc37	protein_coding	ensembl	chr13:76098734-76187983:+
69.743	3.64872	1.54258	2.36533				ENSMUSG00000024217	9	Snrpc	protein_coding	ensembl_havana	chr17:27839974-27851968:+
69.5387	6.14398	2.57628	2.38483				ENSMUSG00000025465	13	Echs1	protein_coding	ensembl_havana	chr7:140105710-140116476:-
69.5168	-2.39665	1.91035	-1.25456	0.209639	0.410021	5.72755	ENSMUSG00000027782	10	Kpna4	protein_coding	ensembl_havana	chr3:69067149-69127113:-
69.5083	-7.16043	1.88525	-3.79813				ENSMUSG00000042211	6	Fbxo38	protein_coding	ensembl	chr18:62504069-62548743:-
69.4311	4.97908	2.20278	2.26036	0.0237988	0.156299	5.72755	ENSMUSG00000058706	5	0610030E20Rik	protein_coding	ensembl_havana	chr6:72347317-72353148:+
69.332	-2.82619	1.67517	-1.68711				ENSMUSG00000021488	7	Nsd1	protein_coding	ensembl	chr13:55209782-55318325:+
69.2882	2.8438	1.6919	1.68084	0.0927949	0.279971	5.25398	ENSMUSG00000035242	15	Oaz1	protein_coding	ensembl_havana	chr10:80826656-80829290:+
69.2825	1.60158	1.61435	0.992086	0.321156	0.576346	4.5	ENSMUSG00000074746	2	Pdzd8	protein_coding	ensembl	chr19:59296084-59345780:-
69.2673	-3.67545	1.86719	-1.96844	0.049018	0.231325	4.5	ENSMUSG00000027835	11	Pdcd10	protein_coding	ensembl_havana	chr3:75516490-75556856:-
69.1382	3.20902	1.9261	1.66607				ENSMUSG00000038418	7	Egr1	protein_coding	ensembl_havana	chr18:34859823-34864984:+
68.9396	-5.55668	2.47726	-2.24307				ENSMUSG00000063652	10	Slc22a21	protein_coding	ensembl_havana	chr11:53949965-53980332:-
68.7698	1.35487	1.68781	0.802737	0.422127	0.611445	5.25398	ENSMUSG00000028859	14	Csf3r	protein_coding	ensembl_havana	chr4:126024550-126044440:+
68.7583	2.93913	2.36718	1.24162				ENSMUSG00000030766	15	Arhgap17	protein_coding	ensembl_havana	chr7:123279218-123369915:-
68.7237	-0.94855	1.48569	-0.638457	0.523176	0.737299	4.5	ENSMUSG00000063015	12	Ccni	protein_coding	ensembl_havana	chr5:93181933-93206495:-
68.6028	-4.49531	2.32577	-1.93283				ENSMUSG00000026235	14	Epha4	protein_coding	ensembl_havana	chr1:77367185-77515088:-
68.5246	-7.33024	2.26817	-3.23179				ENSMUSG00000032278	11	Paqr5	protein_coding	ensembl_havana	chr9:61953481-62026856:-
68.4872	-7.83091	2.22375	-3.52148				ENSMUSG00000057270	3	Olfr1501	protein_coding	ensembl_havana	chr19:13835033-13850692:-
68.4516	3.11469	1.93315	1.6112	0.107137	0.298645	5.25398	ENSMUSG00000021608	14	Lpcat1	protein_coding	ensembl_havana	chr13:73467197-73516422:+
68.4213	4.19999	1.88477	2.22838				ENSMUSG00000026319	13	2310035C23Rik	protein_coding	ensembl_havana	chr1:105663861-105755191:+
68.3781	3.353	2.34104	1.43227				ENSMUSG00000032050	17	Rdx	protein_coding	ensembl_havana	chr9:52047173-52088735:+
68.3734	-9.9595	2.45271	-4.06061				ENSMUSG00000030990	18	Pgap2	protein_coding	ensembl_havana	chr7:102210208-102238567:+
68.2842	-1.20819	1.90189	-0.635259	0.52526	0.737709	4.5	ENSMUSG00000021427	9	Ssr1	protein_coding	ensembl	chr13:37971401-37994190:-
68.2121	2.73731	2.03571	1.34465	0.178739	0.395991	5.25398	ENSMUSG00000031812	16	Map1lc3b	protein_coding	ensembl_havana	chr8:121590361-121598760:+
68.2113	6.55744	2.1971	2.98458				ENSMUSG00000021236	16	Entpd5	protein_coding	ensembl_havana	chr12:84373857-84409029:-
68.2063	3.40326	2.21281	1.53798				ENSMUSG00000070691	10	Runx3	protein_coding	ensembl_havana	chr4:135120652-135177990:+
68.0537	3.26078	2.15243	1.51493				ENSMUSG00000027490	17	E2f1	protein_coding	ensembl_havana	chr2:154559407-154569892:-
67.8801	0.861143	1.68023	0.512514	0.608291	0.797409	4.5	ENSMUSG00000018293	4	Pfn1	protein_coding	ensembl_havana	chr11:70651850-70654644:-
67.8255	-2.99293	1.87378	-1.59727				ENSMUSG00000030095	10	Tmem43	protein_coding	ensembl_havana	chr6:91473703-91488463:+
67.8167	-4.80548	2.2465	-2.1391				ENSMUSG00000020132	9	Rab21	protein_coding	ensembl	chr10:115289863-115315591:-
67.6787	4.9978	2.19089	2.28117				ENSMUSG00000022035	5	Ccdc25	protein_coding	ensembl	chr14:65837302-65866604:+
67.621	0.584716	1.90796	0.306461	0.759254	0.873181	4.5	ENSMUSG00000041841	7	Rpl37	protein_coding	ensembl	chr15:5116613-5119140:+
67.4407	-4.53225	1.71789	-2.63827	0.00833305	0.104622	4.5	ENSMUSG00000026102	9	Inpp1	protein_coding	ensembl_havana	chr1:52785427-52817688:-
67.4252	-8.56707	2.29614	-3.73107				ENSMUSG00000060044	7	Tmem26	protein_coding	ensembl	chr10:68723746-68782654:+
67.3576	-4.9701	2.02137	-2.45878				ENSMUSG00000047193	16	Dync2h1	protein_coding	ensembl_havana	chr9:6928503-7184446:-
67.3362	2.40744	1.94304	1.23901	0.215343	0.46883	4.5	ENSMUSG00000022707	16	Gbe1	protein_coding	ensembl_havana	chr16:70313949-70569716:+
67.2862	4.0863	2.61419	1.56312				ENSMUSG00000052920	14	Prkg1	protein_coding	ensembl_havana	chr19:30567551-31765033:-
67.2185	-0.442829	1.71835	-0.257706	0.796634	0.895073	4.5	ENSMUSG00000022781	8	Pak2	protein_coding	ensembl_havana	chr16:32016290-32079342:-
67.1243	7.11111	2.43376	2.92186				ENSMUSG00000038206	13	Fbxo8	protein_coding	ensembl_havana	chr8:56551090-56593939:+
67.107	4.76137	1.96421	2.42406				ENSMUSG00000051154	11	Commd3	protein_coding	ensembl_havana	chr2:18672384-18676231:+
67.0474	0.324616	1.70471	0.190423	0.848978	0.82719	5.72755	ENSMUSG00000026305	15	Lrrfip1	protein_coding	ensembl_havana	chr1:90998737-91128944:+
67.0248	-2.15289	2.50781	-0.858474				ENSMUSG00000025024	6	Smndc1	protein_coding	ensembl	chr19:53379214-53390573:-
67.0066	6.91327	2.34733	2.94517				ENSMUSG00000047866	18	Lonp2	protein_coding	ensembl_havana	chr8:86624043-86723873:+
66.8985	-1.17846	1.66618	-0.707281	0.479392	0.623773	5.72755	ENSMUSG00000006169	19	Clint1	protein_coding	ensembl_havana	chr11:45852051-45910625:+
66.8687	-4.94845	2.25502	-2.19442				ENSMUSG00000041915	8	Ammecr1l	protein_coding	ensembl	chr18:31759824-31784071:+
66.7429	-6.03788	2.33107	-2.59018				ENSMUSG00000029440	15	Psmd9	protein_coding	ensembl_havana	chr5:123169413-123250131:+
66.6244	-5.37649	2.17325	-2.47393				ENSMUSG00000071708	11	Sms	protein_coding	ensembl_havana	chrX:157443855-157492287:-
66.6159	5.22779	2.10903	2.47876	0.013184	0.131534	4.5	ENSMUSG00000026981	15	Il1rn	protein_coding	ensembl_havana	chr2:24336853-24351494:+
66.5182	7.65292	2.47202	3.09582				ENSMUSG00000027498	14	Cstf1	protein_coding	ensembl_havana	chr2:172370681-172382448:+
66.5003	-2.28478	1.65194	-1.38309	0.166639	0.41254	4.5	ENSMUSG00000032643	12	Fhl3	protein_coding	ensembl_havana	chr4:124700701-124708611:+
66.497	1.8815	2.21233	0.850459				ENSMUSG00000005501	14	Usp40	protein_coding	ensembl_havana	chr1:87945119-88008551:-
66.3433	-3.96599	1.8725	-2.11801				ENSMUSG00000032690	16	Oas2	protein_coding	ensembl_havana	chr5:120730333-120749853:-
66.3368	0.976507	1.77177	0.551147	0.581533	0.688056	5.72755	ENSMUSG00000024590	8	Lmnb1	protein_coding	ensembl_havana	chr18:56707813-56753424:+
66.2719	-6.98024	2.15367	-3.24109				ENSMUSG00000013858	14	Tmem259	protein_coding	ensembl_havana	chr10:79974948-79984330:-
66.2557	0.653952	2.01592	0.324394	0.745639	0.782721	5.72755	ENSMUSG00000036533	8	Cdc42ep3	protein_coding	ensembl	chr17:79334025-79355091:-
66.2392	-1.96675	1.61285	-1.21943	0.222683	0.476643	4.5	ENSMUSG00000021948	15	Prkcd	protein_coding	ensembl_havana	chr14:30595356-30626210:-
66.1935	4.54302	2.41725	1.87941				ENSMUSG00000027712	13	Anxa5	protein_coding	ensembl_havana	chr3:36448923-36475894:-
66.1887	4.0508	2.21974	1.8249				ENSMUSG00000034652	12	Cd300a	protein_coding	ensembl_havana	chr11:114890041-114904654:+
66.1644	5.33648	2.49819	2.13614				ENSMUSG00000073130	8	Gm1141	protein_coding	ensembl_havana	chrX:71928816-71940870:+
66.1486	-2.5568	1.93115	-1.32398				ENSMUSG00000020463	15	Smek2	protein_coding	ensembl_havana	chr11:29172890-29220797:+
66.0591	3.28361	1.8438	1.7809	0.0749292	0.249303	5.72755	ENSMUSG00000053565	10	Eif3k	protein_coding	ensembl_havana	chr7:28971372-28981864:-
66.0562	1.37603	2.03168	0.677287				ENSMUSG00000044533	15	Rps2	protein_coding	ensembl_havana	chr17:24718116-24721929:+
65.9949	3.91496	1.80621	2.1675	0.0301968	0.192538	4.5	ENSMUSG00000029577	13	Ube3b	protein_coding	ensembl_havana	chr5:114380607-114421169:+
65.9588	-4.10353	1.92915	-2.12712				ENSMUSG00000035004	3	Igsf6	protein_coding	ensembl_havana	chr7:121064067-121074572:-
65.9337	0.613348	1.99184	0.30793	0.758135	0.823092	5.25398	ENSMUSG00000046722	14	Cdc42se1	protein_coding	ensembl_havana	chr3:95228732-95236409:+
65.8167	-3.92797	1.87623	-2.09355	0.0363003	0.194858	5.25398	ENSMUSG00000032561	15	Acpp	protein_coding	ensembl_havana	chr9:104288251-104337748:-
65.8032	2.33132	2.35131	0.991499				ENSMUSG00000009549	14	Srp14	protein_coding	ensembl_havana	chr2:118475850-118479711:-
65.6648	2.87733	1.63492	1.75992	0.0784214	0.278588	4.5	ENSMUSG00000041642	18	Kif21b	protein_coding	ensembl_havana	chr1:136131389-136177998:+
65.6226	-1.29818	1.82157	-0.712671				ENSMUSG00000024099	14	Ndufv2	protein_coding	ensembl_havana	chr17:66078795-66101559:-
65.3226	-0.740487	1.40982	-0.525235	0.59942	0.733797	5.25398	ENSMUSG00000079481	11	Nhsl2	protein_coding	ensembl_havana	chrX:101849385-102092055:+
65.2569	-2.98704	2.17023	-1.37637				ENSMUSG00000029722	15	Agfg2	protein_coding	ensembl_havana	chr5:137650463-137684726:-
65.2427	4.19107	1.84224	2.27498	0.0229071	0.172671	4.5	ENSMUSG00000037300	18	Ttc13	protein_coding	ensembl_havana	chr8:124671333-124721983:-
65.1962	-1.35142	2.08536	-0.648049	0.516953	0.647659	5.72755	ENSMUSG00000027502	11	Rtfdc1	protein_coding	ensembl_havana	chr2:172440556-172469908:+
65.1515	-6.15228	1.99944	-3.07701				ENSMUSG00000037965	14	Zc3h7a	protein_coding	ensembl_havana	chr16:11136592-11176393:-
65.1078	4.64807	2.05415	2.26277	0.0236501	0.155732	5.72755	ENSMUSG00000049922	8	Slc35c1	protein_coding	ensembl_havana	chr2:92452764-92460538:-
65.1039	-1.71972	1.54779	-1.11108	0.266535	0.462876	5.72755	ENSMUSG00000026918	16	Brd3	protein_coding	ensembl_havana	chr2:27445579-27507662:-
65.0429	-6.26089	2.16544	-2.89128				ENSMUSG00000079111	3	Kdelr2	protein_coding	ensembl_havana	chr5:143403838-143421901:+
65.0386	-2.48145	2.16768	-1.14475	0.252312	0.450096	5.72755	ENSMUSG00000026357	3	Rgs18	protein_coding	ensembl_havana	chr1:144752683-144775435:-
64.9418	-1.70685	1.48696	-1.14787	0.251021	0.512675	4.5	ENSMUSG00000030045	10	Mrpl19	protein_coding	ensembl_havana	chr6:81957851-81965958:-
64.8847	3.98782	1.90051	2.09829	0.0358798	0.194065	5.25398	ENSMUSG00000033326	15	Kdm4a	protein_coding	ensembl_havana	chr4:118136957-118180043:-
64.788	2.81613	2.1323	1.3207	0.1866	0.438419	4.5	ENSMUSG00000024851	13	Pitpnm1	protein_coding	ensembl_havana	chr19:4099998-4113965:+
64.6651	6.70582	2.24114	2.99215				ENSMUSG00000018973	2	Hoxb1	protein_coding	ensembl_havana	chr11:96365752-96368256:+
64.6387	-6.61717	2.16801	-3.05219				ENSMUSG00000058239	13	Usf2	protein_coding	ensembl_havana	chr7:30945248-30956803:-
64.6162	3.11858	2.22165	1.40372				ENSMUSG00000024174	8	Pot1b	protein_coding	ensembl	chr17:55652025-55712628:-
64.5497	5.24009	2.0146	2.60106	0.00929367	0.10301	5.25398	ENSMUSG00000070372	11	Capza1	protein_coding	ensembl_havana	chr3:104822779-104864505:-
64.5198	2.87911	1.6441	1.75117	0.0799163	0.280187	4.5	ENSMUSG00000034361	10	Cpne2	protein_coding	ensembl_havana	chr8:94532990-94570531:+
64.5012	-2.97236	2.05944	-1.44329				ENSMUSG00000063694	5	Cycs	protein_coding	ensembl_havana	chr6:50562563-50566538:-
64.4543	-0.407249	1.86158	-0.218765	0.826833	0.823092	5.72755	ENSMUSG00000024241	6	Sos1	protein_coding	ensembl	chr17:80393752-80480453:-
64.4464	0.137871	1.54043	0.0895021	0.928683	0.895073	5.25398	ENSMUSG00000031377	11	Bmx	protein_coding	ensembl_havana	chrX:164192842-164258193:-
64.303	1.39178	1.79374	0.775911	0.437801	0.672137	4.5	ENSMUSG00000060143	6	Gm10076	protein_coding	ensembl	chr14:105681828-105682211:+
64.2477	-0.772115	1.88558	-0.409484	0.682185	0.831473	4.5	ENSMUSG00000050856	16	Atp5k	protein_coding	ensembl_havana	chr5:108433244-108434448:-
64.2032	3.86351	1.85156	2.08662	0.0369227	0.196146	5.25398	ENSMUSG00000026977	17	March7	protein_coding	ensembl_havana	chr2:60209887-60250676:+
63.9799	-6.59403	2.30315	-2.86305				ENSMUSG00000037451	7	Slc22a20	protein_coding	ensembl_havana	chr19:5970234-5986143:-
63.9485	4.74917	2.49849	1.90081				ENSMUSG00000055553	16	Kxd1	protein_coding	ensembl_havana	chr8:70508272-70527956:-
63.9128	-0.414599	1.7595	-0.235635	0.813716	0.905972	4.5	ENSMUSG00000026234	12	Ncl	protein_coding	ensembl_havana	chr1:86344719-86359400:-
63.8721	-7.55977	2.0656	-3.65984				ENSMUSG00000060950	11	Trmt61a	protein_coding	ensembl	chr12:111678105-111683902:+
63.8408	1.22036	1.7797	0.685709	0.492897	0.657019	5.25398	ENSMUSG00000040345	9	Arhgap9	protein_coding	ensembl	chr10:127323727-127329943:+
63.7126	1.39561	2.00574	0.695809	0.486548	0.712258	4.5	ENSMUSG00000038069	6	Cdkn2aip	protein_coding	ensembl_havana	chr8:47709344-47713932:-
63.5821	-0.718316	1.75553	-0.409174	0.682412	0.831473	4.5	ENSMUSG00000020385	16	Clk4	protein_coding	ensembl_havana	chr11:51261730-51281766:+
63.5696	-1.29612	1.88871	-0.686243	0.49256	0.717043	4.5	ENSMUSG00000060032	6	H2afj	protein_coding	ensembl_havana	chr6:136808244-136810074:+
63.4416	-0.684016	1.69997	-0.402369	0.687413	0.78447	5.25398	ENSMUSG00000004040	16	Stat3	protein_coding	ensembl_havana	chr11:100885098-100939540:-
63.3888	-4.54556	1.80193	-2.5226	0.0116491	0.115246	5.25398	ENSMUSG00000007411	15	Mark3	protein_coding	ensembl	chr12:111574510-111656227:+
63.3644	3.39947	2.45195	1.38644				ENSMUSG00000043587	15	Pxylp1	protein_coding	ensembl_havana	chr9:96823336-96892669:-
63.3549	2.37574	2.36929	1.00272				ENSMUSG00000006920	14	Ezh1	protein_coding	ensembl_havana	chr11:101191115-101226463:-
63.3501	-1.31462	1.78632	-0.73594				ENSMUSG00000051506	16	Wdfy4	protein_coding	ensembl_havana	chr14:32959547-33185508:-
63.1781	-0.128675	1.58586	-0.0811387	0.935332	0.89854	5.25398	ENSMUSG00000022377	16	Asap1	protein_coding	ensembl_havana	chr15:64086857-64382919:-
63.1045	-0.700991	2.15627	-0.325094				ENSMUSG00000031302	16	Nlgn3	protein_coding	ensembl_havana	chrX:101299168-101325963:+
63.0467	0.921375	1.60522	0.573988	0.565976	0.767631	4.5	ENSMUSG00000020390	12	Ube2b	protein_coding	ensembl_havana	chr11:51985497-52000762:-
62.9002	0.543062	1.88216	0.288532	0.77294	0.880631	4.5	ENSMUSG00000032413	12	Rasa2	protein_coding	ensembl_havana	chr9:96539300-96631617:-
62.8843	3.77079	1.9272	1.95662	0.0503927	0.214177	5.72755	ENSMUSG00000009292	17	Trpm2	protein_coding	ensembl_havana	chr10:77907722-77970563:-
62.8734	0.192519	1.42892	0.13473	0.892825	0.949436	4.5	ENSMUSG00000066406	15	Akap13	protein_coding	ensembl_havana	chr7:75455534-75754609:+
62.8585	-1.19825	1.76615	-0.678451	0.497486	0.721274	4.5	ENSMUSG00000040785	18	Ttc3	protein_coding	ensembl_havana	chr16:94370618-94522117:+
62.7989	-4.23057	1.63442	-2.58842	0.0096418	0.112986	4.5	ENSMUSG00000025314	16	Ptprj	protein_coding	ensembl_havana	chr2:90429754-90580647:-
62.7269	-4.32872	2.11939	-2.04243				ENSMUSG00000020671	8	Rab10	protein_coding	ensembl	chr12:3247430-3309969:-
62.7232	-2.53011	2.11112	-1.19847				ENSMUSG00000036067	12	Slc2a6	protein_coding	ensembl_havana	chr2:27021363-27027998:-
62.7195	-5.69477	1.93895	-2.93703				ENSMUSG00000009090	17	Ap1b1	protein_coding	ensembl_havana	chr11:4986824-5042791:+
62.7051	-2.42483	2.03839	-1.18958				ENSMUSG00000030201	15	Lrp6	protein_coding	ensembl_havana	chr6:134446476-134566965:-
62.7049	-1.75503	2.52335	-0.695515				ENSMUSG00000030868	6	Dctn5	protein_coding	ensembl_havana	chr7:122133041-122149044:+
62.6562	4.41365	1.82981	2.41207				ENSMUSG00000051413	17	Plagl2	protein_coding	ensembl_havana	chr2:153227759-153241426:-
62.5839	-1.55808	1.47524	-1.05615	0.290899	0.549752	4.5	ENSMUSG00000004865	15	Srpk1	protein_coding	ensembl_havana	chr17:28587648-28622521:-
62.3977	-0.174988	1.47687	-0.118486	0.905683	0.849089	5.72755	ENSMUSG00000034163	10	Zfc3h1	protein_coding	ensembl_havana	chr10:115384959-115432772:+
62.3392	-0.719874	2.05772	-0.34984	0.726459	0.771486	5.72755	ENSMUSG00000028557	10	Rnf11	protein_coding	ensembl_havana	chr4:109451098-109484728:-
62.2715	-3.93524	1.79414	-2.19339				ENSMUSG00000019818	15	Cd164	protein_coding	ensembl_havana	chr10:41519414-41531048:+
62.2218	0.498443	1.81157	0.275144	0.783205	0.88811	4.5	ENSMUSG00000066682	11	Pilrb2	protein_coding	ensembl_havana	chr5:137865827-137871815:-
62.1664	1.29161	1.7717	0.729021	0.465989	0.695576	4.5	ENSMUSG00000019872	13	Smpdl3a	protein_coding	ensembl_havana	chr10:57794335-57811830:+
62.1564	-5.22796	1.53805	-3.39908	0.00067612	0.0631664	4.5	ENSMUSG00000000740	12	Rpl13	protein_coding	ensembl_havana	chr8:123102350-123105244:+
62.0786	1.11273	2.13374	0.521494				ENSMUSG00000028792	14	Ak2	protein_coding	ensembl_havana	chr4:128991958-129011529:+
62.0165	-4.18702	1.67781	-2.49552				ENSMUSG00000040111	16	Gramd1b	protein_coding	ensembl_havana	chr9:40293233-40531383:-
61.9533	3.3379	2.2344	1.49387				ENSMUSG00000009681	9	Bcr	protein_coding	ensembl	chr10:75060896-75184923:+
61.8432	4.99022	1.85042	2.6968	0.00700095	0.0983988	4.5	ENSMUSG00000027242	14	Wdr76	protein_coding	ensembl_havana	chr2:121506723-121544860:+
61.8102	4.80122	2.12474	2.25967				ENSMUSG00000025790	14	Slco3a1	protein_coding	ensembl_havana	chr7:74275419-74554780:-
61.7304	5.69567	2.07461	2.74542				ENSMUSG00000028086	15	Fbxw7	protein_coding	ensembl_havana	chr3:84815268-84979198:+
61.7189	-0.366732	2.33676	-0.15694				ENSMUSG00000025485	13	Ric8a	protein_coding	ensembl_havana	chr7:140856957-140864372:+
61.6225	6.74935	2.48043	2.72104				ENSMUSG00000060803	5	Gstp1	protein_coding	ensembl_havana	chr19:4035407-4037921:-
61.5684	4.06667	2.06413	1.97017	0.0488193	0.210693	5.72755	ENSMUSG00000049327	17	Kmt5a	protein_coding	ensembl_havana	chr5:124439930-124462308:+
61.5364	2.96139	1.6335	1.81291	0.0698458	0.26644	4.5	ENSMUSG00000062006	12	Rpl34	protein_coding	ensembl_havana	chr3:130726831-130730398:-
61.533	5.30578	2.50838	2.11523				ENSMUSG00000001249	14	Hpn	protein_coding	ensembl_havana	chr7:31098725-31115290:-
61.5271	1.44568	1.72503	0.838061				ENSMUSG00000079429	9	Mroh2a	protein_coding	ensembl_havana	chr1:88226986-88262289:+
61.4531	-3.81984	2.47509	-1.54331	0.122755	0.321634	5.25398	ENSMUSG00000032047	5	Acat1	protein_coding	ensembl_havana	chr9:53580522-53610382:-
61.4305	-5.62559	2.0697	-2.71807				ENSMUSG00000005102	13	Eif2ak4	protein_coding	ensembl_havana	chr2:118388618-118475234:+
61.3535	6.65348	2.08686	3.18827	0.00143127	0.0678561	4.5	ENSMUSG00000041236	7	Vps41	protein_coding	ensembl	chr13:18717292-18866809:+
61.1173	1.56524	1.47539	1.0609	0.288736	0.548538	4.5	ENSMUSG00000052534	15	Pbx1	protein_coding	ensembl_havana	chr1:168119364-168432270:-
61.0984	3.59375	1.8746	1.91707	0.0552289	0.221952	5.72755	ENSMUSG00000024660	8	Incenp	protein_coding	ensembl	chr19:9872297-9899533:-
61.0903	-2.71474	2.50805	-1.08241				ENSMUSG00000032353	9	Tmed3	protein_coding	ensembl_havana	chr9:89699206-89705068:-
61.0676	-0.879327	2.16766	-0.405657	0.684995	0.746838	5.72755	ENSMUSG00000037373	12	Ctbp1	protein_coding	ensembl_havana	chr5:33247723-33274994:-
60.9828	5.27603	2.16412	2.43796				ENSMUSG00000068580	11	Zfyve19	protein_coding	ensembl_havana	chr2:119208617-119217049:+
60.9733	0.925953	2.06271	0.448901	0.653503	0.823722	4.5	ENSMUSG00000017781	17	Pitpna	protein_coding	ensembl_havana	chr11:75588097-75628804:+
60.9304	-5.56463	1.94271	-2.86436				ENSMUSG00000041215	15	Yeats2	protein_coding	ensembl	chr16:20141063-20232573:+
60.8719	3.36182	2.10338	1.59829				ENSMUSG00000040387	16	Klhl32	protein_coding	ensembl_havana	chr4:24612554-24851124:-
60.8156	4.11817	1.97969	2.08021				ENSMUSG00000056234	14	Ncoa4	protein_coding	ensembl_havana	chr14:32159865-32179855:+
60.8049	5.38624	2.45085	2.1977				ENSMUSG00000031839	7	Hsbp1	protein_coding	ensembl_havana	chr8:119344488-119348922:+
60.77	3.29894	2.38977	1.38044				ENSMUSG00000014077	13	Chp1	protein_coding	ensembl_havana	chr2:119547697-119587027:+
60.6211	3.5315	1.83046	1.9293	0.0536936	0.239543	4.5	ENSMUSG00000020923	17	Ubtf	protein_coding	ensembl_havana	chr11:102304560-102319742:-
60.6082	1.02731	1.72307	0.596206	0.551038	0.754564	4.5	ENSMUSG00000028977	16	Casz1	protein_coding	ensembl_havana	chr4:148804429-148954889:+
60.5761	-1.89617	2.19928	-0.862178				ENSMUSG00000039621	13	Prex1	protein_coding	ensembl_havana	chr2:166566342-166713832:-
60.5492	1.09683	1.82673	0.600435	0.548216	0.752866	4.5	ENSMUSG00000095115	2	Itpripl2	protein_coding	ensembl_havana	chr7:118485111-118491975:-
60.4485	0.538813	1.77065	0.304303	0.760897	0.823722	5.25398	ENSMUSG00000018326	9	Ywhab	protein_coding	ensembl_havana	chr2:163994960-164018588:+
60.3683	-5.43935	2.23409	-2.43471				ENSMUSG00000020496	9	Rnf187	protein_coding	ensembl_havana	chr11:58932288-58938916:-
60.3109	-0.425605	1.87324	-0.227203	0.820266	0.819825	5.72755	ENSMUSG00000040188	10	Scamp2	protein_coding	ensembl_havana	chr9:57560943-57588795:+
60.3013	-0.335648	1.37405	-0.244276	0.807017	0.901228	4.5	ENSMUSG00000069662	5	Marcks	protein_coding	ensembl_havana	chr10:37133375-37138920:-
60.3005	22.5507	2.60836	8.64555				ENSMUSG00000021773	10	Comtd1	protein_coding	ensembl_havana	chr14:21845861-21848977:-
60.2667	4.31562	1.78381	2.41932	0.0155494	0.128496	5.72755	ENSMUSG00000040423	10	Rc3h1	protein_coding	ensembl_havana	chr1:160906418-160974978:+
60.2103	5.3634	2.30485	2.32701				ENSMUSG00000002265	16	Peg3	protein_coding	ensembl_havana	chr7:6703892-6730431:-
60.1335	6.52103	2.40758	2.70854				ENSMUSG00000002885	14	Adgre5	protein_coding	ensembl_havana	chr8:83723251-83741326:-
60.1105	1.8006	1.67213	1.07683	0.281558	0.54401	4.5	ENSMUSG00000021360	15	Gcnt2	protein_coding	ensembl	chr13:40859768-40960891:+
60.0464	-10.6744	2.50316	-4.26437				ENSMUSG00000061723	18	Tnnt3	protein_coding	ensembl_havana	chr7:142498836-142516009:+
59.9921	-1.44686	1.87736	-0.77069	0.440891	0.62438	5.25398	ENSMUSG00000075700	9	Selenot	protein_coding	ensembl_havana	chr3:58576636-58593133:+
59.9766	-4.3231	1.46346	-2.95403	0.0031365	0.0763113	5.25398	ENSMUSG00000031715	14	Smarca5	protein_coding	ensembl_havana	chr8:80698507-80739497:-
59.7662	-1.01264	1.99579	-0.507389				ENSMUSG00000047045	17	Tmem164	protein_coding	ensembl_havana	chrX:142681406-142843494:+
59.752	-1.89603	1.52245	-1.24538	0.212991	0.41254	5.72755	ENSMUSG00000038384	16	Setd1b	protein_coding	ensembl_havana	chr5:123142193-123168629:+
59.6534	3.35915	1.66499	2.01752	0.0436411	0.201309	5.72755	ENSMUSG00000014606	14	Slc25a11	protein_coding	ensembl_havana	chr11:70644196-70647479:-
59.6385	-3.10861	1.66428	-1.86784	0.0617841	0.255353	4.5	ENSMUSG00000029817	11	Tra2a	protein_coding	ensembl_havana	chr6:49243924-49264033:-
59.6254	4.81261	2.24115	2.14739				ENSMUSG00000062519	13	Zfp398	protein_coding	ensembl_havana	chr6:47835661-47873537:+
59.616	2.66113	2.08729	1.27492	0.202337	0.455585	4.5	ENSMUSG00000020143	15	Dock2	protein_coding	ensembl_havana	chr11:34226815-34783892:-
59.4133	-0.955625	2.41856	-0.395122				ENSMUSG00000026032	8	Ndufb3	protein_coding	ensembl_havana	chr1:58586384-58595964:+
59.3709	-0.118301	1.95152	-0.0606199	0.951662	0.865848	5.72755	ENSMUSG00000030263	13	Lrmp	protein_coding	ensembl_havana	chr6:145115653-145174934:+
59.3219	2.6801	1.55355	1.72514	0.0845017	0.263609	5.72755	ENSMUSG00000020476	14	Dbnl	protein_coding	ensembl_havana	chr11:5788488-5800962:+
59.3089	-3.72321	1.94036	-1.91882				ENSMUSG00000071068	6	Treml2	protein_coding	ensembl	chr17:48300038-48312534:+
59.2754	2.2283	1.78746	1.24663	0.212534	0.433773	5.25398	ENSMUSG00000028790	13	Khdrbs1	protein_coding	ensembl_havana	chr4:129703164-129742303:-
59.2603	4.97596	2.0254	2.45678				ENSMUSG00000035293	13	G2e3	protein_coding	ensembl_havana	chr12:51348061-51376986:+
59.2472	3.99868	2.25797	1.77092				ENSMUSG00000075161	2	Olfr1109	protein_coding	ensembl_havana	chr2:87091195-87096241:-
59.2398	-2.39438	2.32327	-1.03061				ENSMUSG00000029344	14	Tpst2	protein_coding	ensembl_havana	chr5:112276691-112315361:+
58.978	6.74165	2.81119	2.39815				ENSMUSG00000018322	10	Tomm34	protein_coding	ensembl_havana	chr2:164053540-164071169:-
58.9695	2.11408	2.02207	1.0455	0.295792	0.515067	5.25398	ENSMUSG00000030059	15	Tmf1	protein_coding	ensembl_havana	chr6:97152997-97179122:-
58.9555	4.74399	1.97975	2.39626	0.0165632	0.145337	4.5	ENSMUSG00000026893	4	Gca	protein_coding	ensembl_havana	chr2:62664285-62694109:+
58.9528	2.16658	1.87777	1.1538	0.248581	0.466085	5.25398	ENSMUSG00000040761	16	Spen	protein_coding	ensembl_havana	chr4:141467890-141538597:-
58.9132	3.23453	2.13209	1.51707				ENSMUSG00000034345	14	Gtf2h5	protein_coding	ensembl_havana	chr17:6079786-6086517:+
58.8868	-1.06123	1.7056	-0.622207	0.533806	0.742384	4.5	ENSMUSG00000068823	10	Csde1	protein_coding	ensembl_havana	chr3:103020426-103058186:+
58.7812	2.3614	1.93368	1.22119	0.222013	0.423965	5.72755	ENSMUSG00000030007	8	Cct7	protein_coding	ensembl_havana	chr6:85451514-85468475:+
58.7183	-2.16462	1.56771	-1.38075	0.167356	0.41254	4.5	ENSMUSG00000066800	11	Rnasel	protein_coding	ensembl_havana	chr1:153749426-153764221:+
58.6259	4.80043	1.98751	2.41529				ENSMUSG00000027668	13	Mfn1	protein_coding	ensembl_havana	chr3:32529465-32579239:+
58.5943	3.8901	2.05098	1.8967	0.0578671	0.225299	5.72755	ENSMUSG00000024294	13	Mib1	protein_coding	ensembl_havana	chr18:10725548-10818704:+
58.5379	4.28124	2.00538	2.13488				ENSMUSG00000029505	17	Ep400	protein_coding	ensembl_havana	chr5:110664373-110770717:-
58.5224	-0.940585	2.08808	-0.450454	0.652383	0.823722	4.5	ENSMUSG00000036587	13	Fut7	protein_coding	ensembl_havana	chr2:25423267-25426374:+
58.5163	-6.37102	2.45403	-2.59615				ENSMUSG00000037344	13	Slc12a9	protein_coding	ensembl_havana	chr5:137314558-137333597:-
58.3723	1.94062	1.86775	1.03901				ENSMUSG00000031165	6	Was	protein_coding	ensembl_havana	chrX:8081453-8090498:-
58.2291	1.23456	1.91783	0.643725				ENSMUSG00000043962	16	Thrap3	protein_coding	ensembl_havana	chr4:126164082-126202760:-
58.2225	5.98426	2.29169	2.61128	0.00902038	0.108946	4.5	ENSMUSG00000022684	14	Bfar	protein_coding	ensembl_havana	chr16:13671858-13703612:+
58.1729	3.93875	2.22423	1.77084	0.0765877	0.263419	5.25398	ENSMUSG00000029647	15	Pan3	protein_coding	ensembl_havana	chr5:147430161-147548502:+
58.0759	-0.0377873	1.72203	-0.0219435	0.982493	1	4.5	ENSMUSG00000030744	13	Rps3	protein_coding	ensembl_havana	chr7:99477896-99483738:-
58.0087	3.32541	2.19536	1.51474				ENSMUSG00000068373	14	D430041D05Rik	protein_coding	ensembl_havana	chr2:104143073-104410334:-
57.9719	-8.03693	2.17609	-3.69329				ENSMUSG00000022983	15	Scaf4	protein_coding	ensembl	chr16:90228957-90284425:-
57.9327	3.87734	2.47746	1.56505	0.117572	0.315371	5.25398	ENSMUSG00000019802	13	Sec63	protein_coding	ensembl_havana	chr10:42761496-42832514:+
57.8583	-0.609231	1.79592	-0.339231	0.734436	0.776922	5.72755	ENSMUSG00000058835	14	Abi1	protein_coding	ensembl_havana	chr2:22940073-23040241:-
57.7765	4.99335	1.91072	2.61333	0.00896643	0.0985776	5.72755	ENSMUSG00000004096	9	Cwc15	protein_coding	ensembl_havana	chr9:14500617-14510577:+
57.6466	1.37754	1.87361	0.735234	0.462197	0.692379	4.5	ENSMUSG00000024066	8	Xdh	protein_coding	ensembl	chr17:73883908-73950182:-
57.6057	0.112104	1.51047	0.0742176	0.940837	0.862288	5.72755	ENSMUSG00000023852	13	Chd1	protein_coding	ensembl_havana	chr17:15704967-17394898:+
57.5722	2.03822	1.97657	1.03119	0.302453	0.558628	4.5	ENSMUSG00000075284	10	Wipf1	protein_coding	ensembl_havana	chr2:73429610-73529734:-
57.5378	-1.63934	2.05688	-0.797004	0.425449	0.614691	5.25398	ENSMUSG00000028191	11	Bcl10	protein_coding	ensembl_havana	chr3:145922804-145934356:+
57.5228	5.00476	2.51561	1.98948				ENSMUSG00000071646	9	Mta2	protein_coding	ensembl_havana	chr19:8941875-8952303:+
57.5115	-10.706	2.5636	-4.17617				ENSMUSG00000108919	2	Olfr1295	protein_coding	ensembl_havana	chr2:111564324-111569681:-
57.4284	-1.00226	1.55604	-0.64411	0.519504	0.648668	5.72755	ENSMUSG00000032253	13	Phip	protein_coding	ensembl_havana	chr9:82866159-82975516:-
57.422	2.1666	2.17994	0.993881				ENSMUSG00000071054	12	Safb	protein_coding	ensembl_havana	chr17:56584825-56606294:+
57.4178	0.0940649	2.03708	0.0461763	0.96317	0.990435	4.5	ENSMUSG00000029203	16	Ube2k	protein_coding	ensembl_havana	chr5:65537233-65598988:+
57.4099	-4.53065	1.75064	-2.58799	0.00965378	0.112986	4.5	ENSMUSG00000057596	13	Trim30d	protein_coding	ensembl_havana	chr7:104470014-104507849:-
57.4077	3.89932	2.047	1.9049	0.0567937	0.245445	4.5	ENSMUSG00000031590	8	Frg1	protein_coding	ensembl_havana	chr8:41397459-41417074:-
57.3984	0.624863	2.09413	0.298388	0.765407	0.823722	5.25398	ENSMUSG00000024885	8	Aldh3b1	protein_coding	ensembl	chr19:3913493-3929761:-
57.2377	-0.843594	2.44192	-0.345463				ENSMUSG00000079017	3	Ifi27l2a	protein_coding	ensembl_havana	chr12:103442167-103443680:-
57.0395	-6.09788	2.05778	-2.96333				ENSMUSG00000013833	15	Med16	protein_coding	ensembl_havana	chr10:79894708-79908923:-
56.9747	6.63423	2.40146	2.76259				ENSMUSG00000035765	9	Dym	protein_coding	ensembl	chr18:75018772-75286966:+
56.8883	5.64525	2.47449	2.28138				ENSMUSG00000042185	14	Nfrkb	protein_coding	ensembl_havana	chr9:31386192-31421333:+
56.7205	-1.32801	2.21256	-0.600214				ENSMUSG00000078153	3	Psme2b	protein_coding	havana	chr11:48945354-48946190:-
56.7087	-4.50583	2.68989	-1.6751				ENSMUSG00000043366	15	Olfr78	protein_coding	ensembl_havana	chr7:102740431-102759471:-
56.6478	-1.09419	1.63953	-0.667383	0.504528	0.72604	4.5	ENSMUSG00000021377	14	Dek	protein_coding	ensembl_havana	chr13:47084775-47106201:-
56.6412	-1.08887	2.04861	-0.531515				ENSMUSG00000019823	17	Mical1	protein_coding	ensembl_havana	chr10:41476314-41487032:+
56.5828	5.30672	2.51539	2.1097	0.0348843	0.19244	5.25398	ENSMUSG00000006941	5	Eif1b	protein_coding	ensembl_havana	chr9:120492232-120495330:+
56.5805	-6.12967	2.1627	-2.83426				ENSMUSG00000031451	6	Gas6	protein_coding	ensembl_havana	chr8:13465374-13494490:-
56.5741	-1.79037	2.04191	-0.876814				ENSMUSG00000043279	9	Trim56	protein_coding	ensembl_havana	chr5:137105644-137116209:-
56.5301	2.3831	1.86423	1.27833	0.201132	0.400546	5.72755	ENSMUSG00000029007	8	Agtrap	protein_coding	ensembl_havana	chr4:148077061-148088031:-
56.3878	-1.58708	2.62354	-0.604939				ENSMUSG00000025058	4	5430427O19Rik	protein_coding	ensembl_havana	chrX:85870354-85891499:+
56.3524	2.72645	2.08507	1.30761				ENSMUSG00000036473	15	Tbc1d24	protein_coding	ensembl_havana	chr17:24175431-24209387:-
56.3174	4.16517	2.08155	2.00099				ENSMUSG00000034591	5	Slc41a2	protein_coding	ensembl_havana	chr10:83230848-83337882:-
56.2823	-0.234992	2.08187	-0.112875	0.910129	0.960954	4.5	ENSMUSG00000021248	8	Tmed10	protein_coding	ensembl	chr12:85340614-85374717:-
56.2296	2.45375	1.86374	1.31657				ENSMUSG00000032462	14	Pik3cb	protein_coding	ensembl_havana	chr9:99036654-99140621:-
56.2204	-0.801908	2.10557	-0.380851	0.703314	0.845266	4.5	ENSMUSG00000073557	11	Ppp1r12b	protein_coding	ensembl_havana	chr1:134754658-134955942:-
56.2108	4.51857	2.24855	2.00955				ENSMUSG00000031078	15	Cttn	protein_coding	ensembl_havana	chr7:144435733-144471009:-
56.1553	4.18441	1.87999	2.22577	0.0260298	0.181895	4.5	ENSMUSG00000029614	13	Rpl6	protein_coding	ensembl_havana	chr5:121204481-121209241:+
56.1512	-1.95788	1.84113	-1.06341				ENSMUSG00000027947	11	Il6ra	protein_coding	ensembl_havana	chr3:89864059-89913196:-
56.1393	-1.70564	2.31089	-0.738085				ENSMUSG00000028152	10	Tspan5	protein_coding	ensembl_havana	chr3:138742195-138907905:+
56.1043	5.90828	2.14056	2.76015				ENSMUSG00000021967	3	Mrpl57	protein_coding	ensembl	chr14:57826239-57828745:+
55.9924	-0.00595085	1.76134	-0.0033786	0.997304	1	4.5	ENSMUSG00000024927	7	Rela	protein_coding	ensembl_havana	chr19:5637483-5648130:+
55.8522	-3.0672	1.76723	-1.7356				ENSMUSG00000026356	15	Dars	protein_coding	ensembl_havana	chr1:128363707-128417368:-
55.8039	3.35262	1.71869	1.95068	0.0510953	0.233527	4.5	ENSMUSG00000033352	11	Map2k4	protein_coding	ensembl_havana	chr11:65688243-65788297:-
55.6944	4.67056	1.89926	2.45915				ENSMUSG00000015968	16	Cacna1d	protein_coding	ensembl	chr14:30039949-30491156:-
55.6905	1.91349	1.84697	1.03601				ENSMUSG00000057191	13	AB124611	protein_coding	ensembl_havana	chr9:21526176-21545333:+
55.6862	1.87338	1.76794	1.05964	0.289308	0.508129	5.25398	ENSMUSG00000054509	7	Parp4	protein_coding	ensembl_havana	chr14:56575619-56659794:+
55.671	3.37094	2.47489	1.36206				ENSMUSG00000017412	15	Cacnb4	protein_coding	ensembl_havana	chr2:52428320-52676831:-
55.5287	3.98535	2.1162	1.88326				ENSMUSG00000031642	9	Sh3rf1	protein_coding	ensembl_havana	chr8:61223872-61396071:+
55.5211	2.37428	1.99825	1.18818	0.234761	0.489952	4.5	ENSMUSG00000027465	13	Tbc1d20	protein_coding	ensembl_havana	chr2:152293828-152313996:+
55.4773	0.482265	1.93683	0.248998				ENSMUSG00000005873	5	Reep5	protein_coding	ensembl	chr18:34344889-34373415:-
55.4025	0.789098	1.79875	0.438692	0.660885	0.827133	4.5	ENSMUSG00000024387	13	Csnk2b	protein_coding	ensembl_havana	chr17:35116196-35122053:-
55.2988	0.74415	1.89056	0.393613	0.693867	0.838958	4.5	ENSMUSG00000008200	14	Fnbp4	protein_coding	ensembl_havana	chr2:90745370-90781021:+
55.2536	-1.98811	2.22388	-0.893983				ENSMUSG00000021624	9	Cd180	protein_coding	ensembl_havana	chr13:102693558-102739629:+
55.1981	3.75743	2.78416	1.34958				ENSMUSG00000069135	11	Fgfr1op	protein_coding	ensembl_havana	chr17:8165501-8196804:+
55.1825	3.92851	1.87773	2.09216				ENSMUSG00000098557	1	Kctd12	protein_coding	havana	chr14:102976581-102982637:-
55.1055	5.59489	1.95674	2.85929	0.00424585	0.0788993	5.25398	ENSMUSG00000066151	11	Fkbp15	protein_coding	ensembl_havana	chr4:62300342-62360548:-
54.9933	3.86237	1.69672	2.27637	0.0228238	0.172615	4.5	ENSMUSG00000021770	10	Samd8	protein_coding	ensembl_havana	chr14:21750531-21798725:+
54.7927	5.43242	2.62209	2.07179				ENSMUSG00000002578	15	Ikzf4	protein_coding	ensembl_havana	chr10:128630843-128645991:-
54.7709	4.9659	2.15368	2.30578	0.0211229	0.165578	4.5	ENSMUSG00000026753	5	Ppp6c	protein_coding	ensembl_havana	chr2:39194354-39226451:-
54.7617	4.10535	1.85124	2.21762	0.0265808	0.183151	4.5	ENSMUSG00000021591	7	Glrx	protein_coding	ensembl_havana	chr13:75839868-75850151:+
54.7355	1.57052	2.20316	0.712847				ENSMUSG00000066149	11	Cdc26	protein_coding	ensembl_havana	chr4:62383654-62408642:-
54.6205	-1.33257	1.76736	-0.75399	0.450855	0.605475	5.72755	ENSMUSG00000019961	17	Tmpo	protein_coding	ensembl_havana	chr10:91147571-91181315:-
54.5834	-0.338062	2.08486	-0.162151	0.871187	0.939972	4.5	ENSMUSG00000078348	4	Sf3b5	protein_coding	ensembl_havana	chr10:13005343-13009183:+
54.5605	3.56342	2.21485	1.60888				ENSMUSG00000032393	15	Dpp8	protein_coding	ensembl_havana	chr9:65032414-65082651:+
54.4722	0.114545	2.39032	0.0479202				ENSMUSG00000036565	7	Ttyh3	protein_coding	ensembl_havana	chr5:140620578-140649031:-
54.462	-0.798938	1.78337	-0.447993	0.654158	0.823722	4.5	ENSMUSG00000027907	4	S100a11	protein_coding	ensembl_havana	chr3:93520488-93526287:+
54.3751	5.65903	2.61789	2.16167				ENSMUSG00000034707	6	Gns	protein_coding	ensembl	chr10:121365090-121397245:+
54.3647	-2.67235	2.32042	-1.15167				ENSMUSG00000049225	14	Pdp1	protein_coding	ensembl_havana	chr4:11958184-11966452:-
54.3632	1.79549	1.96544	0.913531	0.360963	0.611192	4.5	ENSMUSG00000020733	3	Slc9a3r1	protein_coding	ensembl_havana	chr11:115163341-115181181:+
54.2976	-0.854416	2.12072	-0.402889				ENSMUSG00000022400	8	Rbx1	protein_coding	ensembl	chr15:81466316-81476369:+
54.2961	1.73959	1.92152	0.905321	0.365295	0.548197	5.72755	ENSMUSG00000053012	17	Krcc1	protein_coding	ensembl_havana	chr6:71271677-71285319:+
54.2885	-5.0934	2.04547	-2.49009				ENSMUSG00000033618	6	Map3k13	protein_coding	ensembl	chr16:21891969-21931877:+
54.2351	-0.129824	1.59177	-0.0815593	0.934997	0.975679	4.5	ENSMUSG00000060373	14	Hnrnpc	protein_coding	ensembl	chr14:52073380-52104028:-
54.0617	6.23639	2.23189	2.79422				ENSMUSG00000078853	8	Igtp	protein_coding	ensembl_havana	chr11:58199556-58207591:+
54.0326	3.83784	1.98301	1.93536	0.052946	0.22507	5.25398	ENSMUSG00000029022	18	Miip	protein_coding	ensembl_havana	chr4:147860778-147868816:-
54.0235	-4.04893	1.85916	-2.17782				ENSMUSG00000026924	17	Sec16a	protein_coding	ensembl_havana	chr2:26409431-26445216:-
53.9322	1.24203	1.94336	0.639116	0.522747	0.737299	4.5	ENSMUSG00000032359	14	Ctsh	protein_coding	ensembl_havana	chr9:90054152-90076089:+
53.8293	-1.91209	1.53972	-1.24184	0.214295	0.435408	5.25398	ENSMUSG00000039218	16	Srrm2	protein_coding	ensembl_havana	chr17:23790662-23824741:+
53.8075	-3.04831	1.81248	-1.68185				ENSMUSG00000020954	15	Strn3	protein_coding	ensembl	chr12:51608541-51691914:-
53.7561	-10.2402	2.45008	-4.17953				ENSMUSG00000018570	17	2810408A11Rik	protein_coding	ensembl_havana	chr11:69897352-69900987:-
53.7162	-0.0859526	1.83518	-0.0468361	0.962644	0.872658	5.72755	ENSMUSG00000029765	12	Plxna4	protein_coding	ensembl_havana	chr6:32144268-32588192:-
53.7014	0.562438	1.50784	0.37301	0.709141	0.760626	5.72755	ENSMUSG00000003345	15	Csnk1g2	protein_coding	ensembl	chr10:80622780-80640771:+
53.5779	2.19681	2.22271	0.988349				ENSMUSG00000078619	10	Smarcd2	protein_coding	ensembl_havana	chr11:106263179-106272972:-
53.5555	7.01019	2.64643	2.64892	0.00807492	0.10301	4.5	ENSMUSG00000014177	10	Tvp23b	protein_coding	ensembl_havana	chr11:62879455-62916780:+
53.516	-3.10749	1.49961	-2.0722	0.0382465	0.19244	5.72755	ENSMUSG00000049076	9	Acap2	protein_coding	ensembl	chr16:31092413-31201238:-
53.5117	-4.67923	2.05206	-2.28026				ENSMUSG00000038780	14	Smurf1	protein_coding	ensembl_havana	chr5:144876495-144965847:-
53.5003	21.2146	2.93063	7.23895				ENSMUSG00000027984	8	Hadh	protein_coding	ensembl_havana	chr3:131233419-131272101:-
53.4697	7.34599	2.3496	3.12648				ENSMUSG00000079557	10	March2	protein_coding	ensembl_havana	chr17:33685692-33718670:-
53.4239	2.38961	2.25427	1.06004				ENSMUSG00000056305	4	Usp39	protein_coding	ensembl_havana	chr6:72318678-72345184:-
53.4209	3.65068	2.13835	1.70724				ENSMUSG00000034007	10	Scaper	protein_coding	ensembl_havana	chr9:55549879-55938119:-
53.4063	0.465096	1.88735	0.246427	0.805351	0.813227	5.72755	ENSMUSG00000021771	13	Vdac2	protein_coding	ensembl_havana	chr14:21831269-21845879:+
53.0238	-3.47599	2.12089	-1.63893				ENSMUSG00000071644	10	Eef1g	protein_coding	ensembl_havana	chr19:8967041-8978479:+
53.0073	6.0528	2.37627	2.54718				ENSMUSG00000050663	7	Trhde	protein_coding	ensembl_havana	chr10:114398823-114802307:-
52.9575	0.455246	2.1495	0.211792				ENSMUSG00000020409	10	Slu7	protein_coding	ensembl_havana	chr11:43433744-43447981:+
52.9073	2.05181	2.0413	1.00515	0.314825	0.531675	5.25398	ENSMUSG00000045875	12	Adra1a	protein_coding	ensembl_havana	chr14:66635251-66733462:+
52.8671	0.00871321	1.73895	0.00501062	0.996002	0.929577	5.25398	ENSMUSG00000032812	18	Arap1	protein_coding	ensembl_havana	chr7:101348067-101412586:+
52.852	-8.49928	2.65611	-3.1999				ENSMUSG00000074939	3	Chrm5	protein_coding	ensembl_havana	chr2:112479171-112480769:-
52.8349	5.56554	1.93608	2.87464	0.00404485	0.0806986	4.5	ENSMUSG00000030313	15	Dennd5b	protein_coding	ensembl_havana	chr6:148988071-149101680:-
52.8221	0.405024	1.64917	0.245593	0.805998	0.836946	5.25398	ENSMUSG00000095562	7	Gm21887	protein_coding	ensembl	chrX:170009659-170019281:+
52.7747	5.63731	2.19926	2.56328	0.0103689	0.103509	5.72755	ENSMUSG00000028211	11	Trp53inp1	protein_coding	ensembl_havana	chr4:11156431-11174379:+
52.7287	-1.0385	1.56844	-0.662119	0.507895	0.729669	4.5	ENSMUSG00000071369	11	Map3k5	protein_coding	ensembl_havana	chr10:19934472-20142753:+
52.6778	-5.57663	1.79408	-3.10836				ENSMUSG00000048799	7	Cep120	protein_coding	ensembl	chr18:53681724-53744547:-
52.6126	-2.09726	1.93082	-1.0862				ENSMUSG00000032661	9	Oas3	protein_coding	ensembl_havana	chr5:120753098-120777661:-
52.5985	7.30905	2.50528	2.91746	0.00352897	0.0788993	4.5	ENSMUSG00000036850	4	Mrpl41	protein_coding	ensembl_havana	chr2:24974117-24975098:-
52.5984	3.18465	1.53646	2.07272	0.038198	0.198951	5.25398	ENSMUSG00000058600	13	Rpl30	protein_coding	ensembl_havana	chr15:34440505-34443640:-
52.527	4.85171	1.85413	2.61671	0.00887826	0.101917	5.25398	ENSMUSG00000020368	15	Canx	protein_coding	ensembl_havana	chr11:50293961-50325673:-
52.5122	-3.1001	1.93045	-1.60589	0.108298	0.299427	5.25398	ENSMUSG00000025066	9	Sfr1	protein_coding	ensembl	chr19:47731756-47735588:+
52.4608	3.28317	2.0389	1.61027	0.10734	0.324106	4.5	ENSMUSG00000029993	16	Nfu1	protein_coding	ensembl_havana	chr6:87009236-87028461:+
52.418	-5.10682	2.62023	-1.94899				ENSMUSG00000052428	10	Tmco1	protein_coding	ensembl_havana	chr1:167308378-167333978:+
52.3524	0.125739	1.63226	0.0770338	0.938597	0.900658	5.25398	ENSMUSG00000006740	13	Kif5b	protein_coding	ensembl_havana	chr18:6201002-6242174:-
52.3327	3.55051	2.15895	1.64456	0.100061	0.278703	5.72755	ENSMUSG00000016194	14	Hsd11b1	protein_coding	ensembl_havana	chr1:193221634-193264075:-
52.3248	-0.562924	1.73678	-0.324119	0.745848	0.864768	4.5	ENSMUSG00000026341	16	Actr3	protein_coding	ensembl_havana	chr1:125392905-125435727:-
52.2499	3.08141	1.8489	1.66661	0.0955914	0.28232	5.25398	ENSMUSG00000040693	7	Slco4c1	protein_coding	ensembl_havana	chr1:96816270-96872171:-
52.2251	-0.296119	2.01352	-0.147065	0.883081	0.838958	5.72755	ENSMUSG00000039449	14	Prpf18	protein_coding	ensembl_havana	chr2:4622058-4652113:-
52.2122	1.8402	2.02469	0.908883	0.363412	0.546996	5.72755	ENSMUSG00000022427	3	Tomm22	protein_coding	ensembl_havana	chr15:79670861-79672862:+
52.1758	-2.31613	1.99705	-1.15977				ENSMUSG00000021939	7	Ctsb	protein_coding	ensembl	chr14:63122462-63145919:+
52.1607	4.60236	2.25479	2.04114				ENSMUSG00000075600	2	Zc3h3	protein_coding	ensembl	chr15:75754432-75841915:-
52.1553	0.0911705	1.92921	0.0472579	0.962308	0.989869	4.5	ENSMUSG00000047798	15	Cd300lf	protein_coding	ensembl_havana	chr11:115116214-115133992:-
52.0927	-8.42226	2.31043	-3.64533	0.000267053	0.0529872	4.5	ENSMUSG00000032274	9	Cyp19a1	protein_coding	ensembl_havana	chr9:54165937-54268110:-
52.0444	-3.82001	1.93666	-1.97247	0.0485558	0.210693	5.72755	ENSMUSG00000035027	17	Map2k2	protein_coding	ensembl_havana	chr10:81105915-81124697:+
52.0386	-0.821756	2.28256	-0.360015	0.718836	0.766653	5.72755	ENSMUSG00000013593	12	Ndufs2	protein_coding	ensembl_havana	chr1:171234853-171251388:-
52.0348	-6.93634	2.49156	-2.78393	0.0053705	0.0883601	4.5	ENSMUSG00000058773	2	Hist1h1b	protein_coding	ensembl_havana	chr13:21779883-21780625:-
52.0083	-0.604956	1.75562	-0.344583	0.730408	0.774033	5.72755	ENSMUSG00000027540	13	Ptpn1	protein_coding	ensembl_havana	chr2:167932057-167979385:+
51.9513	-1.99117	2.2404	-0.888758				ENSMUSG00000021680	7	Crhbp	protein_coding	ensembl	chr13:95431371-95444831:-
51.941	0.885123	1.50275	0.589001	0.555861	0.759424	4.5	ENSMUSG00000016087	13	Fli1	protein_coding	ensembl_havana	chr9:32422204-32542861:-
51.9404	0.292123	1.58644	0.184138	0.853905	0.828202	5.72755	ENSMUSG00000030530	15	Furin	protein_coding	ensembl_havana	chr7:80388585-80405436:-
51.9098	3.16248	2.13573	1.48075				ENSMUSG00000003234	15	Abcf3	protein_coding	ensembl_havana	chr16:20548577-20561379:+
51.7925	2.02405	1.85942	1.08854				ENSMUSG00000054604	7	Cggbp1	protein_coding	ensembl_havana	chr16:64851996-64859507:+
51.5998	-10.2085	2.62622	-3.88713				ENSMUSG00000110103	1	Zscan4-ps1	protein_coding	havana	chr7:11065139-11069691:-
51.5858	-0.465095	1.70879	-0.272177	0.785486	0.889415	4.5	ENSMUSG00000004535	12	Tax1bp1	protein_coding	ensembl_havana	chr6:52713729-52766780:+
51.5609	5.73301	2.39419	2.39455				ENSMUSG00000038048	7	Cntnap5c	protein_coding	ensembl	chr17:57769570-58410342:+
51.4988	4.43954	2.20681	2.01175				ENSMUSG00000048100	13	Taf13	protein_coding	ensembl_havana	chr3:108571698-108583222:+
51.4884	2.02129	2.01738	1.00194				ENSMUSG00000068130	11	Zfp442	protein_coding	ensembl_havana	chr2:150407141-150451486:-
51.4561	0.894796	2.47674	0.361279				ENSMUSG00000007739	10	Cct4	protein_coding	ensembl_havana	chr11:22990519-23003780:+
51.4356	-4.22449	2.34265	-1.8033				ENSMUSG00000023277	12	Twf2	protein_coding	ensembl_havana	chr9:106203108-106215389:+
51.4233	3.16558	1.65698	1.91045				ENSMUSG00000002699	13	Lcp2	protein_coding	ensembl_havana	chr11:34046920-34092295:+
51.4198	-1.56268	1.9061	-0.819829				ENSMUSG00000066684	10	Pilrb1	protein_coding	ensembl_havana	chr5:137852147-137858106:-
51.3829	-6.97372	2.23089	-3.12599	0.00177209	0.072166	4.5	ENSMUSG00000034951	10	Cog7	protein_coding	ensembl_havana	chr7:121879363-121981711:-
51.29	6.95845	2.32451	2.99351	0.00275791	0.0763113	4.5	ENSMUSG00000029922	15	Mkrn1	protein_coding	ensembl_havana	chr6:39397804-39420462:-
51.2685	-2.68049	1.72714	-1.55198				ENSMUSG00000035569	17	Ankrd11	protein_coding	ensembl_havana	chr8:122883822-123042277:-
51.2618	5.17572	1.78443	2.90048	0.00372587	0.0799663	4.5	ENSMUSG00000042331	13	Specc1	protein_coding	ensembl_havana	chr11:61956763-62223013:+
51.1897	0.399394	2.0542	0.194428	0.845841	0.85578	5.25398	ENSMUSG00000043207	10	Zmpste24	protein_coding	ensembl_havana	chr4:121059237-121098241:-
51.1833	5.79166	2.46273	2.35172				ENSMUSG00000027088	10	Phospho2	protein_coding	ensembl_havana	chr2:69789623-69800005:+
51.1647	22.3238	2.79028	8.00055				ENSMUSG00000028182	14	Lrriq3	protein_coding	ensembl_havana	chr3:155093434-155194280:+
51.1412	22.3259	2.69955	8.27023				ENSMUSG00000027194	16	Ttc17	protein_coding	ensembl_havana	chr2:94300767-94406689:-
51.1081	-7.41217	2.06436	-3.59054				ENSMUSG00000058569	7	Tmed9	protein_coding	ensembl	chr13:55593135-55597663:+
51.0815	6.14766	2.30301	2.6694				ENSMUSG00000000148	17	Brat1	protein_coding	ensembl_havana	chr5:140705011-140719379:+
51.0679	-5.47368	1.82483	-2.99956	0.00270372	0.0741489	5.72755	ENSMUSG00000020516	15	Rps6kb1	protein_coding	ensembl_havana	chr11:86498871-86544805:-
51.067	-6.26926	2.0662	-3.0342				ENSMUSG00000029676	15	Pot1a	protein_coding	ensembl_havana	chr6:25743737-25809246:-
51.028	-0.0058131	1.62585	-0.00357542				ENSMUSG00000022636	13	Alcam	protein_coding	ensembl_havana	chr16:52248996-52454074:-
50.9716	2.25588	1.86911	1.20692	0.227462	0.429724	5.72755	ENSMUSG00000027309	18	4930402H24Rik	protein_coding	ensembl_havana	chr2:130706200-130906406:-
50.9673	2.27691	1.88444	1.20827	0.226944	0.44676	5.25398	ENSMUSG00000015013	9	Trappc2l	protein_coding	ensembl_havana	chr8:122611640-122616660:+
50.8749	0.815462	1.90327	0.428452	0.668322	0.82719	4.5	ENSMUSG00000019971	9	Cep290	protein_coding	ensembl	chr10:100488289-100573655:+
50.8448	3.09649	1.79257	1.72741	0.0840942	0.263609	5.72755	ENSMUSG00000020184	14	Mdm2	protein_coding	ensembl_havana	chr10:117688888-117710758:-
50.833	-8.03615	2.34391	-3.42853				ENSMUSG00000035227	7	Spcs2	protein_coding	ensembl_havana	chr7:99837569-99863462:-
50.7757	5.56678	2.01481	2.76293				ENSMUSG00000026490	18	Cdc42bpa	protein_coding	ensembl_havana	chr1:179960472-180165603:+
50.7311	-6.39325	1.94228	-3.29162	0.000996131	0.0645746	4.5	ENSMUSG00000035623	14	Rsf1	protein_coding	ensembl_havana	chr7:97579889-97692778:+
50.7202	4.17365	2.02306	2.06304	0.0391085	0.200262	5.25398	ENSMUSG00000024219	15	Anks1	protein_coding	ensembl_havana	chr17:27909340-28062600:+
50.6678	1.49418	2.10051	0.711342	0.476873	0.623747	5.72755	ENSMUSG00000022307	15	Oxr1	protein_coding	ensembl	chr15:41447482-41861048:+
50.6606	1.09081	1.70441	0.639994				ENSMUSG00000040725	13	Hnrnpul1	protein_coding	ensembl_havana	chr7:25721165-25754757:-
50.6115	-0.702695	1.62545	-0.432308	0.665517	0.82719	4.5	ENSMUSG00000026950	17	Neb	protein_coding	ensembl_havana	chr2:52136647-52378474:-
50.5951	4.81141	2.12881	2.26014				ENSMUSG00000025580	15	Eif4a3	protein_coding	ensembl_havana	chr11:119288363-119300089:-
50.5558	4.26955	2.40039	1.77869				ENSMUSG00000047459	14	Dynlrb1	protein_coding	ensembl_havana	chr2:155236533-155250277:+
50.5403	3.31504	2.45998	1.34759				ENSMUSG00000070799	4	Psg26	protein_coding	ensembl_havana	chr7:18474582-18484177:-
50.5359	0.918555	1.74092	0.527627				ENSMUSG00000001472	17	Tcf25	protein_coding	ensembl_havana	chr8:123373753-123403835:+
50.5349	-1.79541	1.85252	-0.969173	0.332459	0.584675	4.5	ENSMUSG00000033545	14	Znrf1	protein_coding	ensembl_havana	chr8:111536097-111626030:+
50.4356	2.40231	2.06624	1.16265				ENSMUSG00000020075	7	Ddx21	protein_coding	ensembl	chr10:62580248-62602298:-
50.4027	0.216874	1.61217	0.134523	0.892989	0.949436	4.5	ENSMUSG00000020841	5	Cpd	protein_coding	ensembl_havana	chr11:76778424-76847018:-
50.4007	1.47018	2.30682	0.637318				ENSMUSG00000030304	11	Ergic2	protein_coding	ensembl_havana	chr6:148179079-148212374:-
50.3425	1.96476	2.14621	0.915455	0.359953	0.610775	4.5	ENSMUSG00000030019	6	Fbxl14	protein_coding	ensembl_havana	chr6:119479668-119482630:+
50.3148	1.20999	1.88369	0.642352				ENSMUSG00000026014	15	Raph1	protein_coding	ensembl_havana	chr1:60482292-60567104:-
50.3129	2.8278	1.65325	1.71045	0.0871824	0.27142	5.25398	ENSMUSG00000000157	15	Itgb2l	protein_coding	ensembl_havana	chr16:96422288-96443619:-
50.2627	-1.7526	2.18325	-0.802746				ENSMUSG00000031774	8	Fam192a	protein_coding	ensembl_havana	chr8:94574138-94601997:-
50.142	2.8307	1.69116	1.67382	0.0941656	0.271354	5.72755	ENSMUSG00000005103	12	Wdr1	protein_coding	ensembl_havana	chr5:38526813-38563221:-
49.9881	2.93679	1.84363	1.59293				ENSMUSG00000034820	3	Cpsf7	protein_coding	ensembl	chr19:10525244-10547735:+
49.9526	-3.19993	1.5833	-2.02105	0.0432748	0.221866	4.5	ENSMUSG00000040220	10	Gas8	protein_coding	ensembl_havana	chr8:123518834-123536650:+
49.9305	-3.85226	2.02007	-1.907	0.0565207	0.244598	4.5	ENSMUSG00000091537	2	Tma7	protein_coding	ensembl_havana	chr9:109074568-109082587:-
49.902	2.23392	1.83817	1.2153				ENSMUSG00000040225	15	Prrc2c	protein_coding	ensembl_havana	chr1:162670725-162740556:-
49.8503	22.2873	2.61752	8.51468				ENSMUSG00000019854	17	Reps1	protein_coding	ensembl_havana	chr10:18055861-18125155:+
49.838	-7.39333	2.55193	-2.89715	0.00376573	0.080195	4.5	ENSMUSG00000032782	19	Cntrob	protein_coding	ensembl_havana	chr11:69299487-69323775:-
49.8276	3.14717	2.10884	1.49237				ENSMUSG00000060445	11	Sycp2	protein_coding	ensembl_havana	chr2:178345293-178407685:-
49.758	-0.305184	1.63673	-0.18646	0.852084	0.929144	4.5	ENSMUSG00000030509	17	Asb7	protein_coding	ensembl_havana	chr7:66644565-66689596:-
49.7371	0.594884	1.99028	0.298895				ENSMUSG00000032328	12	Tmem30a	protein_coding	ensembl_havana	chr9:79768943-79793507:-
49.7311	-0.478836	1.73969	-0.275243	0.78313	0.88811	4.5	ENSMUSG00000003037	16	Rab8a	protein_coding	ensembl_havana	chr8:72161200-72183904:+
49.6953	4.88341	2.39619	2.03799				ENSMUSG00000034621	14	Gpatch8	protein_coding	ensembl_havana	chr11:102475915-102556392:-
49.6741	-3.994	2.23278	-1.78881				ENSMUSG00000040528	15	Milr1	protein_coding	ensembl_havana	chr11:106751226-106768794:+
49.6621	3.45274	2.0286	1.70203				ENSMUSG00000057406	16	Whsc1	protein_coding	ensembl_havana	chr5:33820725-33897975:+
49.6371	-7.51098	2.37694	-3.15994				ENSMUSG00000087141	1	Plcxd2	protein_coding	ensembl_havana	chr16:45959263-46010218:-
49.6319	-1.38484	2.14213	-0.646475				ENSMUSG00000053101	2	Gpr141	protein_coding	ensembl	chr13:19749682-19824257:-
49.6047	1.60845	1.7534	0.917334	0.358968	0.563401	5.25398	ENSMUSG00000030096	8	Slc6a6	protein_coding	ensembl_havana	chr6:91684053-91759066:+
49.557	4.19245	2.39149	1.75307	0.0795901	0.279971	4.5	ENSMUSG00000020456	17	Ogdh	protein_coding	ensembl_havana	chr11:6291633-6356642:+
49.5512	8.6868	2.76311	3.14385				ENSMUSG00000033862	7	Cdk10	protein_coding	ensembl_havana	chr8:123224842-123232250:+
49.5054	-0.176048	1.62841	-0.10811	0.913908	0.961983	4.5	ENSMUSG00000024300	16	Myo1f	protein_coding	ensembl_havana	chr17:33555719-33607764:+
49.4879	0.399682	1.61736	0.24712	0.804815	0.901111	4.5	ENSMUSG00000041453	12	Rpl21	protein_coding	ensembl_havana	chr5:146832890-146837032:+
49.4789	5.1099	2.05493	2.48665				ENSMUSG00000029030	14	Tprgl	protein_coding	ensembl_havana	chr4:154157485-154160666:-
49.4537	2.28305	1.39569	1.63579	0.101884	0.290766	5.25398	ENSMUSG00000021025	7	Nfkbia	protein_coding	ensembl	chr12:55489411-55492647:-
49.4521	4.21094	1.83464	2.29524	0.0217196	0.1481	5.72755	ENSMUSG00000020640	9	Itsn2	protein_coding	ensembl	chr12:4593008-4713950:+
49.4511	-0.601492	2.23578	-0.269031	0.787906	0.889955	4.5	ENSMUSG00000075387	2	Olfr341	protein_coding	ensembl_havana	chr2:36473721-36482468:-
49.3492	4.95727	2.36943	2.09218				ENSMUSG00000037085	7	Trmt12	protein_coding	ensembl	chr15:58872649-58876781:+
49.3405	2.38418	2.24644	1.06132				ENSMUSG00000090059	4	Olfr1062	protein_coding	ensembl_havana	chr2:86420399-86426749:-
49.3191	-5.01499	2.18539	-2.29478				ENSMUSG00000025393	12	Atp5b	protein_coding	ensembl_havana	chr10:128083273-128090391:+
49.2685	3.55455	1.5419	2.3053	0.0211496	0.165578	4.5	ENSMUSG00000034275	18	Igsf9b	protein_coding	ensembl_havana	chr9:27299204-27357546:+
49.1731	-1.08713	2.04398	-0.531869	0.594817	0.696275	5.72755	ENSMUSG00000039419	17	Cntnap2	protein_coding	ensembl_havana	chr6:45059357-47304213:+
49.1723	4.87881	2.11636	2.30529	0.0211505	0.145411	5.72755	ENSMUSG00000057133	14	Chd6	protein_coding	ensembl_havana	chr2:160946978-161109075:-
49.1072	-6.12343	2.17757	-2.81205				ENSMUSG00000020032	14	Nuak1	protein_coding	ensembl_havana	chr10:84370905-84440597:-
49.1067	-3.2608	2.25548	-1.44573	0.148254	0.388026	4.5	ENSMUSG00000016308	12	Ube2a	protein_coding	ensembl_havana	chrX:36873900-36884222:+
49.0713	-4.4576	1.87453	-2.37799	0.0174075	0.137272	5.25398	ENSMUSG00000070327	14	Rnf213	protein_coding	ensembl_havana	chr11:119393100-119487418:+
49.0667	0.406115	1.92575	0.210886	0.832976	0.918397	4.5	ENSMUSG00000002058	13	Unc119	protein_coding	ensembl_havana	chr11:78343482-78349164:+
49.0632	-0.401083	1.756	-0.228407	0.81933	0.908867	4.5	ENSMUSG00000036246	14	Gmip	protein_coding	ensembl_havana	chr8:69808679-69821870:+
49.0411	1.62934	1.78628	0.912139	0.361696	0.611445	4.5	ENSMUSG00000044456	16	Rin3	protein_coding	ensembl_havana	chr12:102283048-102390855:+
49.0346	-3.60407	1.97022	-1.82927				ENSMUSG00000086564	9	Cd101	protein_coding	ensembl_havana	chr3:100993529-101029556:-
49.03	0.046105	1.73826	0.0265236				ENSMUSG00000029135	10	Fosl2	protein_coding	ensembl_havana	chr5:32135801-32157842:+
48.9716	-25.6336	2.96061	-8.6582				ENSMUSG00000019909	3	Fam162b	protein_coding	ensembl	chr10:51585420-51590480:-
48.9544	8.6803	2.7999	3.10022				ENSMUSG00000035836	2	Ugt2b1	protein_coding	ensembl_havana	chr5:86916638-86926530:-
48.9142	-0.201086	2.05887	-0.0976685	0.922196	0.890335	5.25398	ENSMUSG00000000056	7	Narf	protein_coding	ensembl_havana	chr11:121237253-121255856:+
48.8689	-2.15569	1.44314	-1.49375	0.135242	0.322723	5.72755	ENSMUSG00000022048	8	Dpysl2	protein_coding	ensembl_havana	chr14:66802864-66868688:-
48.8496	4.05519	2.0501	1.97804	0.0479242	0.210393	5.72755	ENSMUSG00000015542	17	Nat9	protein_coding	ensembl_havana	chr11:115182832-115187859:-
48.7347	-1.94461	2.26684	-0.857851				ENSMUSG00000024235	10	Map3k8	protein_coding	ensembl_havana	chr18:4331327-4353015:-
48.7279	0.986303	1.88893	0.522148	0.601567	0.792882	4.5	ENSMUSG00000005506	16	Celf1	protein_coding	ensembl_havana	chr2:90940382-91019497:+
48.6454	0.661447	1.80918	0.365606	0.714659	0.850368	4.5	ENSMUSG00000025477	14	Inpp5a	protein_coding	ensembl_havana	chr7:139389109-139579652:+
48.5962	0.743523	1.45267	0.511833	0.608768	0.797409	4.5	ENSMUSG00000029229	8	Chic2	protein_coding	ensembl_havana	chr5:74997988-75044774:-
48.4941	2.65246	1.73838	1.52583	0.127053	0.326162	5.25398	ENSMUSG00000030341	17	Tnfrsf1a	protein_coding	ensembl_havana	chr6:125349362-125362484:+
48.4896	-25.6322	2.62299	-9.7721				ENSMUSG00000036362	2	P2ry13	protein_coding	ensembl_havana	chr3:59207892-59210882:-
48.4481	-6.70854	2.15341	-3.11531				ENSMUSG00000020097	14	Sgpl1	protein_coding	ensembl_havana	chr10:61098642-61147703:-
48.4363	-4.76186	1.61816	-2.94277	0.0032529	0.0763113	4.5	ENSMUSG00000036192	15	Rorb	protein_coding	ensembl_havana	chr19:18930605-19111196:-
48.4158	-2.92951	1.8526	-1.5813				ENSMUSG00000001588	12	Acap1	protein_coding	ensembl_havana	chr11:69881567-69895539:-
48.37	0.756348	1.58337	0.477682	0.632876	0.813227	4.5	ENSMUSG00000059923	13	Grb2	protein_coding	ensembl_havana	chr11:115644045-115708597:-
48.2869	4.14465	1.8669	2.22007	0.0264139	0.165578	5.72755	ENSMUSG00000022956	10	Atp5o	protein_coding	ensembl_havana	chr16:91684398-91931687:-
48.2865	-4.37933	1.84337	-2.37573	0.0175145	0.150211	4.5	ENSMUSG00000034032	15	Rpap1	protein_coding	ensembl_havana	chr2:119763304-119787537:-
48.2666	3.17931	2.13805	1.48701				ENSMUSG00000004085	14	Zak	protein_coding	ensembl_havana	chr2:72285637-72442610:+
48.2665	6.07677	2.41812	2.51301				ENSMUSG00000037813	13	D630003M21Rik	protein_coding	ensembl_havana	chr2:158182533-158229222:-
48.2493	-25.6121	2.97359	-8.61317				ENSMUSG00000045569	6	Mc2r	protein_coding	ensembl	chr18:68406907-68429251:-
48.2398	-0.47896	1.85052	-0.258825	0.79577	0.807703	5.72755	ENSMUSG00000040850	17	Psme4	protein_coding	ensembl_havana	chr11:30771726-30880361:+
48.2326	4.43419	1.96706	2.25423				ENSMUSG00000020866	17	Cacna1g	protein_coding	ensembl_havana	chr11:94408391-94474198:-
48.2143	-4.62394	1.62898	-2.83855	0.00453192	0.0788993	5.72755	ENSMUSG00000026609	15	Ush2a	protein_coding	ensembl_havana	chr1:188262023-188965041:+
48.1875	4.57026	2.60821	1.75226				ENSMUSG00000051864	9	Tbc1d22a	protein_coding	ensembl	chr15:86214459-86498503:+
48.1505	4.55524	1.82361	2.49793	0.0124923	0.129634	4.5	ENSMUSG00000027677	17	Ttc14	protein_coding	ensembl_havana	chr3:33799832-33814860:+
48.1254	5.7102	2.1255	2.68652				ENSMUSG00000006276	10	Eps15l1	protein_coding	ensembl_havana	chr8:72340999-72421460:-
48.124	-5.8954	1.77151	-3.32789	0.000875051	0.0645746	4.5	ENSMUSG00000032386	15	Trip4	protein_coding	ensembl_havana	chr9:65828930-65908794:-
48.0928	0.0991338	2.03192	0.0487883	0.961088	0.989187	4.5	ENSMUSG00000028832	11	Stmn1	protein_coding	ensembl_havana	chr4:134468320-134473843:+
48.0884	-8.00586	2.46443	-3.24856				ENSMUSG00000030166	14	Rad52	protein_coding	ensembl_havana	chr6:119902698-119922828:+
48.0691	0.884227	2.03419	0.434684	0.663792	0.82719	4.5	ENSMUSG00000002668	7	Dennd1c	protein_coding	ensembl	chr17:57066056-57078510:-
48.0198	5.03869	2.43968	2.0653				ENSMUSG00000030254	16	Rad18	protein_coding	ensembl_havana	chr6:112619850-112696686:-
47.9977	-10.3273	2.58027	-4.00242				ENSMUSG00000067855	7	Speer3	protein_coding	ensembl_havana	chr5:13791619-13796820:+
47.9929	-7.06057	2.39017	-2.95401				ENSMUSG00000019917	9	Sept10	protein_coding	ensembl	chr10:59164113-59221847:-
47.9061	0.254316	2.26442	0.112309	0.910578	0.88634	5.25398	ENSMUSG00000034252	14	Senp6	protein_coding	ensembl_havana	chr9:80066903-80144953:+
47.7831	-3.54613	1.6216	-2.18681	0.0287565	0.18967	4.5	ENSMUSG00000033392	16	Clasp2	protein_coding	ensembl_havana	chr9:113741473-113919682:+
47.7383	0.00225784	1.6649	0.00135614	0.998918	0.889071	5.72755	ENSMUSG00000032525	15	Nktr	protein_coding	ensembl_havana	chr9:121719169-121756843:+
47.6723	-0.748658	2.19459	-0.341138	0.733	0.859833	4.5	ENSMUSG00000031311	17	Nono	protein_coding	ensembl_havana	chrX:101429318-101448591:+
47.6301	0.599718	1.93941	0.309226				ENSMUSG00000026276	17	Sept2	protein_coding	ensembl_havana	chr1:93478964-93510260:+
47.6191	-6.40138	2.07153	-3.09016				ENSMUSG00000001227	11	Sema6b	protein_coding	ensembl	chr17:56123085-56140343:-
47.606	-6.46555	2.30501	-2.80501				ENSMUSG00000033966	7	Cdkl4	protein_coding	ensembl	chr17:80523550-80563834:-
47.6026	-3.34684	2.01339	-1.66229				ENSMUSG00000040774	15	Cept1	protein_coding	ensembl_havana	chr3:106502260-106547802:-
47.5999	-1.43569	2.2659	-0.633606	0.526338	0.737709	4.5	ENSMUSG00000025232	8	Hexa	protein_coding	ensembl_havana	chr9:59539540-59565109:+
47.5722	-0.803788	1.79304	-0.448282	0.65395	0.733797	5.72755	ENSMUSG00000002111	8	Spi1	protein_coding	ensembl_havana	chr2:91082390-91115756:+
47.5604	-10.73	2.45383	-4.37275				ENSMUSG00000025408	15	Ddit3	protein_coding	ensembl_havana	chr10:127290774-127296288:+
47.5435	-7.80872	2.22242	-3.51362				ENSMUSG00000021481	11	Zfp346	protein_coding	ensembl_havana	chr13:55105311-55134825:+
47.5271	-3.96675	1.83926	-2.15672				ENSMUSG00000054611	16	Kdm2a	protein_coding	ensembl_havana	chr19:4314419-4398285:-
47.5265	2.128	1.65646	1.28467	0.198909	0.398721	5.72755	ENSMUSG00000052917	14	Senp7	protein_coding	ensembl_havana	chr16:56048338-56190012:+
47.4084	0.72313	2.05706	0.351535	0.725187	0.85578	4.5	ENSMUSG00000064127	13	Med14	protein_coding	ensembl_havana	chrX:12675369-12762073:-
47.405	-2.70344	1.83136	-1.4762				ENSMUSG00000040723	14	Rcsd1	protein_coding	ensembl_havana	chr1:165646516-165709757:-
47.4031	-1.34533	2.1442	-0.627427	0.53038	0.741204	4.5	ENSMUSG00000071528	3	Usmg5	protein_coding	ensembl	chr19:47083471-47090625:-
47.3961	5.52893	2.43851	2.26734				ENSMUSG00000026934	15	Lhx3	protein_coding	ensembl_havana	chr2:26200212-26208289:-
47.3903	-0.808487	1.81209	-0.446164	0.655479	0.823722	4.5	ENSMUSG00000078671	11	Chd2	protein_coding	ensembl_havana	chr7:73426638-73541830:-
47.369	3.27209	1.70283	1.92156	0.054661	0.221094	5.72755	ENSMUSG00000071415	6	Rpl23	protein_coding	ensembl_havana	chr11:97777527-97782437:-
47.3389	-8.43958	2.35018	-3.59104				ENSMUSG00000047821	16	Trim16	protein_coding	ensembl_havana	chr11:62820231-62850808:+
47.2972	-2.73516	1.85559	-1.47402				ENSMUSG00000022957	19	Itsn1	protein_coding	ensembl_havana	chr16:91729281-91920597:+
47.2839	-0.653592	1.8769	-0.348229				ENSMUSG00000109516	1	Gm6882	protein_coding	ensembl_havana	chr7:21425858-21432745:-
47.2177	5.44856	2.04534	2.66388	0.00772443	0.102662	4.5	ENSMUSG00000029629	17	Phf14	protein_coding	ensembl_havana	chr6:11907809-12081205:+
47.143	5.41316	2.26001	2.39519				ENSMUSG00000031166	13	Wdr13	protein_coding	ensembl_havana	chrX:8123301-8132892:-
47.1274	5.31126	2.81328	1.88792				ENSMUSG00000021423	5	Ly86	protein_coding	ensembl	chr13:37345345-37419036:+
47.1213	2.7613	2.49011	1.10891	0.26747	0.530393	4.5	ENSMUSG00000020386	5	Sar1b	protein_coding	ensembl_havana	chr11:51763687-51791925:+
47.1097	3.64156	2.06061	1.76723				ENSMUSG00000031391	18	L1cam	protein_coding	ensembl_havana	chrX:73853778-73896105:-
47.1088	-8.13816	2.50847	-3.24428				ENSMUSG00000058927	5	Gm10053	protein_coding	ensembl	chr19:24875686-24876634:+
47.1036	-2.45655	1.38748	-1.77051	0.0766422	0.274774	4.5	ENSMUSG00000066036	14	Ubr4	protein_coding	ensembl_havana	chr4:139352609-139489588:+
47.0667	-6.21138	2.3081	-2.69112				ENSMUSG00000026577	13	Blzf1	protein_coding	ensembl_havana	chr1:164289800-164307489:-
46.9805	-3.83704	2.22008	-1.72833				ENSMUSG00000033728	14	Lrrc14	protein_coding	ensembl_havana	chr15:76710623-76717699:+
46.8648	-4.23551	2.24881	-1.88345				ENSMUSG00000006127	9	Inpp5k	protein_coding	ensembl_havana	chr11:75630988-75648871:+
46.7975	-1.52844	1.84462	-0.828595	0.407333	0.648668	4.5	ENSMUSG00000047731	17	Wbp1l	protein_coding	ensembl_havana	chr19:46599084-46657389:+
46.7475	3.79783	2.06355	1.84044				ENSMUSG00000038664	16	Herc1	protein_coding	ensembl_havana	chr9:66350450-66508775:+
46.6648	3.92815	2.04463	1.9212	0.0547062	0.240348	4.5	ENSMUSG00000024400	15	Wdr33	protein_coding	ensembl	chr18:31804057-31908987:+
46.6335	6.17017	2.47629	2.4917				ENSMUSG00000025035	8	Arl3	protein_coding	ensembl	chr19:46531109-46573085:-
46.6251	-1.80584	1.86876	-0.966333				ENSMUSG00000028410	13	Dnaja1	protein_coding	ensembl_havana	chr4:40722150-40737149:+
46.578	0.913742	1.8935	0.482569	0.629402	0.746968	5.25398	ENSMUSG00000017715	11	Pgs1	protein_coding	ensembl_havana	chr11:117986292-118024011:+
46.5574	1.91146	1.8387	1.03957	0.298539	0.555857	4.5	ENSMUSG00000037234	17	Hook3	protein_coding	ensembl_havana	chr8:26021421-26119224:-
46.5447	0.90335	1.61407	0.559673	0.575703	0.71748	5.25398	ENSMUSG00000048118	17	Arid4a	protein_coding	ensembl_havana	chr12:71015990-71098592:+
46.5299	-1.99345	1.47053	-1.3556	0.175228	0.391183	5.25398	ENSMUSG00000036790	5	Slitrk2	protein_coding	ensembl_havana	chrX:66649318-66661393:+
46.5168	-9.34698	2.59688	-3.5993				ENSMUSG00000075153	2	Olfr1135	protein_coding	ensembl_havana	chr2:87669835-87673664:-
46.5097	2.15666	2.11696	1.01875				ENSMUSG00000032827	15	Ppp1r9a	protein_coding	ensembl_havana	chr6:4902917-5165661:+
46.5038	-2.1225	2.19342	-0.967667				ENSMUSG00000062083	1	Rpl13a-ps1	protein_coding	ensembl	chr19:50030124-50030735:-
46.3421	-3.37821	1.9724	-1.71274				ENSMUSG00000022952	16	Runx1	protein_coding	ensembl_havana	chr16:92601466-92826149:-
46.3122	-5.85431	1.83148	-3.19649	0.00139111	0.0669511	4.5	ENSMUSG00000059456	13	Ptk2b	protein_coding	ensembl_havana	chr14:66153257-66281052:-
46.2552	-3.79837	1.96495	-1.93306				ENSMUSG00000016252	7	Atp5e	protein_coding	ensembl_havana	chr2:174461072-174464105:-
46.236	5.13397	2.24154	2.29037				ENSMUSG00000006673	14	Qrich1	protein_coding	ensembl_havana	chr9:108516806-108560163:+
46.2108	-0.00488689	2.19242	-0.002229	0.998222	1	4.5	ENSMUSG00000034247	9	Plekhm1	protein_coding	ensembl_havana	chr11:103364275-103412687:-
46.1861	-0.430242	2.05487	-0.209376	0.834155	0.918488	4.5	ENSMUSG00000024897	8	Apba1	protein_coding	ensembl	chr19:23758876-23949597:+
46.1757	-1.10327	1.82378	-0.604933				ENSMUSG00000064215	13	Ifi27	protein_coding	ensembl_havana	chr12:103434211-103440239:+
46.1303	3.86406	2.42055	1.59636				ENSMUSG00000020794	13	Ube2g1	protein_coding	ensembl_havana	chr11:72607283-72686481:+
46.1215	1.1106	1.702	0.652529	0.51406	0.645027	5.72755	ENSMUSG00000024921	17	Smarca2	protein_coding	ensembl_havana	chr19:26605050-26778322:+
46.1094	8.54929	2.61084	3.27454				ENSMUSG00000059714	13	Flot1	protein_coding	ensembl_havana	chr17:35823230-35832791:+
46.0311	-0.0798698	1.48796	-0.0536774	0.957192	0.908867	5.25398	ENSMUSG00000031662	8	Snx20	protein_coding	ensembl_havana	chr8:88626563-88636128:-
46.0071	0.118934	1.36185	0.0873327	0.930407	0.895073	5.25398	ENSMUSG00000027339	15	Rassf2	protein_coding	ensembl_havana	chr2:131989415-132030258:-
45.9747	-1.30412	1.44039	-0.905398	0.365255	0.614691	4.5	ENSMUSG00000024073	14	Birc6	protein_coding	ensembl_havana	chr17:74528295-74703356:+
45.9348	5.16228	1.89478	2.72448	0.00644026	0.0953793	4.5	ENSMUSG00000032570	17	Atp2c1	protein_coding	ensembl_havana	chr9:105403539-105527319:-
45.8749	-0.365108	1.77741	-0.205416	0.837247	0.852285	5.25398	ENSMUSG00000015837	15	Sqstm1	protein_coding	ensembl_havana	chr11:50199366-50210827:-
45.8075	2.63948	1.89378	1.39376	0.16339	0.408018	4.5	ENSMUSG00000049744	15	Arhgap15	protein_coding	ensembl_havana	chr2:43748824-44395953:+
45.7961	2.18672	2.33271	0.937418				ENSMUSG00000031246	14	Sh3bgrl	protein_coding	ensembl_havana	chrX:109095365-109197873:+
45.7932	-1.36369	1.94759	-0.700192				ENSMUSG00000030216	12	Wbp11	protein_coding	ensembl_havana	chr6:136813654-136828233:-
45.7739	-0.908467	1.80262	-0.50397	0.614283	0.801055	4.5	ENSMUSG00000066415	4	Msl2	protein_coding	ensembl_havana	chr9:101074101-101104800:+
45.7378	-1.85783	1.96524	-0.945348				ENSMUSG00000034636	9	Zyg11b	protein_coding	ensembl_havana	chr4:108229724-108301096:-
45.7327	-2.72575	1.82317	-1.49506	0.134899	0.322473	5.72755	ENSMUSG00000032479	15	Map4	protein_coding	ensembl_havana	chr9:109931460-110083955:+
45.7085	-6.6297	2.253	-2.9426				ENSMUSG00000039470	15	Zdhhc2	protein_coding	ensembl_havana	chr8:40423815-40510268:+
45.6843	-5.92755	2.4281	-2.44123				ENSMUSG00000094182	2	Olfr937	protein_coding	ensembl_havana	chr9:39058851-39064951:-
45.5866	0.461084	2.12855	0.216618	0.828506	0.848192	5.25398	ENSMUSG00000038717	8	Atp5l	protein_coding	ensembl_havana	chr9:44912557-44920742:-
45.5834	-2.82762	1.98495	-1.42453	0.154294	0.396393	4.5	ENSMUSG00000025612	5	Bach1	protein_coding	ensembl_havana	chr16:87698945-87733346:+
45.5702	7.09192	2.62923	2.69734				ENSMUSG00000074591	7	Ankub1	protein_coding	ensembl_havana	chr3:57657393-57692799:-
45.5246	-1.29248	1.61261	-0.801485	0.422851	0.611692	5.25398	ENSMUSG00000030657	11	Xylt1	protein_coding	ensembl_havana	chr7:117380979-117673580:+
45.4869	1.34081	1.6135	0.830994				ENSMUSG00000022788	16	Fgd4	protein_coding	ensembl_havana	chr16:16416917-16600549:-
45.4531	1.27713	2.14518	0.595349				ENSMUSG00000032336	17	Nptn	protein_coding	ensembl_havana	chr9:58582240-58657955:+
45.4286	0.102832	1.96398	0.0523587	0.958243	0.98742	4.5	ENSMUSG00000060938	14	Rpl26	protein_coding	ensembl_havana	chr11:68901583-68906989:+
45.3669	-8.81116	2.61298	-3.37207				ENSMUSG00000062310	7	Glrp1	protein_coding	ensembl_havana	chr1:88499871-88510066:-
45.3487	-10.2715	2.49056	-4.12418				ENSMUSG00000043463	6	Rab9b	protein_coding	ensembl_havana	chrX:136858147-136868755:-
45.3097	1.66427	2.10307	0.791353	0.428738	0.66303	4.5	ENSMUSG00000021413	8	Prpf4b	protein_coding	ensembl	chr13:34875494-34902877:+
45.309	1.54851	2.2327	0.693559				ENSMUSG00000029563	16	Foxp2	protein_coding	ensembl_havana	chr6:14901349-15441977:+
45.278	1.18133	1.94614	0.607011	0.543844	0.74929	4.5	ENSMUSG00000046532	8	Ar	protein_coding	ensembl_havana	chrX:98148769-98323215:+
45.2195	3.85558	1.97254	1.95463	0.0506271	0.232727	4.5	ENSMUSG00000089917	7	Uckl1	protein_coding	ensembl_havana	chr2:181569149-181584892:-
45.1832	1.78229	1.9072	0.93451	0.350041	0.601344	4.5	ENSMUSG00000026655	14	Fam107b	protein_coding	ensembl_havana	chr2:3613758-3782142:+
45.1816	-5.31769	2.25972	-2.35325				ENSMUSG00000044148	6	1810030O07Rik	protein_coding	ensembl_havana	chrX:12654879-12673668:-
45.1627	3.12046	1.75488	1.77816	0.0753779	0.273639	4.5	ENSMUSG00000027787	14	Nmd3	protein_coding	ensembl_havana	chr3:69721985-69756373:+
45.1627	-3.08036	1.56725	-1.96545				ENSMUSG00000021451	15	Sema4d	protein_coding	ensembl_havana	chr13:51701246-51793747:-
45.1588	3.95596	2.14828	1.84146	0.0655548	0.263419	4.5	ENSMUSG00000018761	14	Mpdu1	protein_coding	ensembl_havana	chr11:69656697-69662642:-
45.1553	2.3692	2.0879	1.13473				ENSMUSG00000027737	10	Slc7a11	protein_coding	ensembl_havana	chr3:49892526-50443614:-
45.0883	-2.89609	2.07005	-1.39904				ENSMUSG00000021756	12	Il6st	protein_coding	ensembl_havana	chr13:112464070-112510086:+
45.0866	1.35587	1.77864	0.762309	0.445876	0.628523	5.25398	ENSMUSG00000037958	13	Nsrp1	protein_coding	ensembl_havana	chr11:77044292-77078435:-
45.0289	3.16085	2.28115	1.38564				ENSMUSG00000006262	15	Mob1b	protein_coding	ensembl_havana	chr5:88720855-88764220:+
44.9975	-2.61237	2.25776	-1.15706				ENSMUSG00000055932	15	Fto	protein_coding	ensembl_havana	chr8:91313525-91668439:+
44.8163	4.26331	2.14453	1.98799	0.0468125	0.214177	5.25398	ENSMUSG00000022971	18	Ifnar2	protein_coding	ensembl_havana	chr16:91372783-91405589:+
44.7899	-4.73794	1.59304	-2.97415	0.00293806	0.0763113	5.72755	ENSMUSG00000034573	14	Ptpn13	protein_coding	ensembl_havana	chr5:103425192-103598303:+
44.7425	-0.602502	2.08014	-0.289645	0.772088	0.880434	4.5	ENSMUSG00000021870	17	Slmap	protein_coding	ensembl_havana	chr14:26413168-26534931:-
44.7059	4.21202	2.49558	1.68779				ENSMUSG00000051095	6	Olfr986	protein_coding	ensembl_havana	chr9:40180920-40190134:+
44.6804	2.13935	2.25231	0.949848				ENSMUSG00000030232	17	Aebp2	protein_coding	ensembl_havana	chr6:140622663-140678472:+
44.6474	-3.05324	2.53724	-1.20337				ENSMUSG00000020219	6	Timm13	protein_coding	ensembl	chr10:80899450-80900969:-
44.6433	3.9333	2.109	1.86501	0.0621803	0.255845	4.5	ENSMUSG00000039959	13	Hip1	protein_coding	ensembl_havana	chr5:135406531-135545120:-
44.6142	-1.63807	1.38191	-1.18537	0.235873	0.491625	4.5	ENSMUSG00000048154	16	Kmt2d	protein_coding	ensembl_havana	chr15:98831669-98871204:-
44.5692	0.0386935	1.53513	0.0252053	0.979891	1	4.5	ENSMUSG00000027506	15	Tpd52	protein_coding	ensembl_havana	chr3:8925593-9004723:-
44.5537	-0.555568	1.64257	-0.338231	0.735189	0.810765	5.25398	ENSMUSG00000003316	14	Glg1	protein_coding	ensembl_havana	chr8:111154421-111259216:-
44.5315	1.95568	2.57268	0.760172				ENSMUSG00000054003	13	Tdrd9	protein_coding	ensembl_havana	chr12:111971559-112068854:+
44.4302	-0.394653	1.77394	-0.222472	0.823946	0.846537	5.25398	ENSMUSG00000028452	7	Vcp	protein_coding	ensembl_havana	chr4:42979963-43000507:-
44.4139	-2.22232	1.95892	-1.13447				ENSMUSG00000030265	14	Kras	protein_coding	ensembl_havana	chr6:145216699-145250239:-
44.2884	3.46515	2.25831	1.5344	0.124931	0.32401	5.25398	ENSMUSG00000024187	14	Fam234a	protein_coding	ensembl_havana	chr17:26211822-26244223:-
44.2118	-0.63114	1.66981	-0.377972	0.705452	0.846537	4.5	ENSMUSG00000036006	19	Fam65b	protein_coding	ensembl_havana	chr13:24582189-24733816:+
44.2062	6.2417	2.63728	2.36672				ENSMUSG00000028572	13	Hook1	protein_coding	ensembl_havana	chr4:95967240-96025413:+
44.1452	-0.465488	2.10008	-0.221652	0.824584	0.846648	5.25398	ENSMUSG00000013415	9	Igf2bp1	protein_coding	ensembl_havana	chr11:95957163-96005940:-
44.1289	3.39753	2.81838	1.20549				ENSMUSG00000021373	15	Cap2	protein_coding	ensembl_havana	chr13:46501848-46649642:+
44.1191	-7.92701	2.35853	-3.36099				ENSMUSG00000029322	12	Plac8	protein_coding	ensembl_havana	chr5:100553725-100572245:-
44.0913	4.93087	2.35028	2.09799				ENSMUSG00000020153	14	Ndufs7	protein_coding	ensembl_havana	chr10:80249121-80256794:+
44.0779	-1.40043	1.71736	-0.815455	0.414812	0.605763	5.25398	ENSMUSG00000005233	16	Spc25	protein_coding	ensembl_havana	chr2:69193895-69206194:-
44.0266	3.2864	1.97692	1.66238				ENSMUSG00000031935	9	Med17	protein_coding	ensembl_havana	chr9:15260351-15279931:-
44.0024	0.263247	1.79174	0.146923	0.883193	0.945973	4.5	ENSMUSG00000018209	15	Stk4	protein_coding	ensembl_havana	chr2:164070322-164155524:+
43.9763	4.64121	2.22951	2.08172	0.0373682	0.209344	4.5	ENSMUSG00000031400	10	G6pdx	protein_coding	ensembl_havana	chrX:74409483-74429194:-
43.8765	-2.59571	2.70514	-0.959547				ENSMUSG00000016253	12	Nelfcd	protein_coding	ensembl_havana	chr2:174415804-174427502:+
43.8632	-0.0255961	1.97983	-0.0129284				ENSMUSG00000024598	8	Fbn2	protein_coding	ensembl	chr18:58008623-58209926:-
43.8569	2.37945	1.90755	1.24739				ENSMUSG00000021196	13	Pfkp	protein_coding	ensembl_havana	chr13:6579768-6648777:-
43.8238	2.44528	2.21669	1.10312				ENSMUSG00000041685	15	Fcho2	protein_coding	ensembl	chr13:98723407-98815449:-
43.8178	-7.78042	2.42864	-3.20361				ENSMUSG00000020705	6	Ddx42	protein_coding	ensembl_havana	chr11:106216926-106249139:+
43.78	1.76843	1.97244	0.896569	0.369949	0.61816	4.5	ENSMUSG00000035278	8	Plekhj1	protein_coding	ensembl	chr10:80796100-80798626:-
43.7656	3.89373	2.16715	1.79671	0.0723823	0.255745	5.25398	ENSMUSG00000048076	14	Arf1	protein_coding	ensembl_havana	chr11:59211412-59228270:-
43.6927	0.694746	1.56496	0.443938	0.657087	0.825307	4.5	ENSMUSG00000024991	7	Eif3a	protein_coding	ensembl	chr19:60761116-60790693:-
43.6921	0.962152	1.51895	0.633432	0.526451	0.737709	4.5	ENSMUSG00000029455	14	Aldh2	protein_coding	ensembl_havana	chr5:121566027-121593824:-
43.6215	-2.157	1.74657	-1.23499	0.216835	0.47111	4.5	ENSMUSG00000046908	5	Ltb4r1	protein_coding	ensembl_havana	chr14:55765962-55768494:+
43.6203	0.429829	2.12789	0.201998				ENSMUSG00000031264	13	Btk	protein_coding	ensembl_havana	chrX:134542336-134583570:-
43.6006	-3.44278	2.20804	-1.5592	0.118949	0.31789	5.25398	ENSMUSG00000089832	8	Shkbp1	protein_coding	ensembl_havana	chr7:27342133-27356019:-
43.553	2.91464	1.74905	1.66642	0.0956307	0.28232	5.25398	ENSMUSG00000002028	13	Kmt2a	protein_coding	ensembl_havana	chr9:44803355-44881296:-
43.5523	3.39257	1.94785	1.7417				ENSMUSG00000036792	12	Mbd5	protein_coding	ensembl_havana	chr2:48949508-49325405:+
43.5339	-1.68194	1.80001	-0.934402				ENSMUSG00000072875	2	Gpr27	protein_coding	ensembl_havana	chr6:99692679-99695066:+
43.5096	-2.17777	1.43748	-1.51499	0.129776	0.360968	4.5	ENSMUSG00000034781	5	Gna11	protein_coding	ensembl_havana	chr10:81528724-81545190:-
43.4979	2.52863	1.55455	1.6266	0.103822	0.319906	4.5	ENSMUSG00000027422	15	Rrbp1	protein_coding	ensembl_havana	chr2:143947395-144011263:-
43.4875	4.28989	2.06257	2.07988				ENSMUSG00000024188	15	Luc7l	protein_coding	ensembl_havana	chr17:26252910-26285504:+
43.4747	22.0912	3.16589	6.97787				ENSMUSG00000094701	2	Olfr916	protein_coding	ensembl_havana	chr9:38657269-38659875:-
43.41	-1.56106	1.86792	-0.835719				ENSMUSG00000026113	17	Inpp4a	protein_coding	ensembl_havana	chr1:37299865-37410736:+
43.4037	-3.19526	2.31764	-1.37867				ENSMUSG00000030629	15	Zfand6	protein_coding	ensembl_havana	chr7:84613766-84689959:-
43.3732	0.955295	1.65031	0.57886	0.562684	0.675778	5.72755	ENSMUSG00000031660	13	Brd7	protein_coding	ensembl_havana	chr8:88331039-88362194:-
43.3728	1.89921	1.79874	1.05585	0.291035	0.549752	4.5	ENSMUSG00000032515	8	Csrnp1	protein_coding	ensembl_havana	chr9:119971163-119984658:-
43.3438	-1.58368	1.86834	-0.847638	0.39664	0.567026	5.72755	ENSMUSG00000025428	15	Atp5a1	protein_coding	ensembl_havana	chr18:77773729-77782869:+
43.3305	0.250511	2.32387	0.107799	0.914155	0.961983	4.5	ENSMUSG00000015839	6	Nfe2l2	protein_coding	ensembl_havana	chr2:75675513-75704641:-
43.3291	0.58822	1.90619	0.308584				ENSMUSG00000039219	17	Arid4b	protein_coding	ensembl_havana	chr13:14063232-14199603:+
43.3059	-3.22826	2.32401	-1.38909				ENSMUSG00000001366	14	Fbxo9	protein_coding	ensembl_havana	chr9:78081499-78109065:-
43.3017	4.65764	2.16997	2.1464				ENSMUSG00000013076	16	Amotl1	protein_coding	ensembl_havana	chr9:14541966-14643529:-
43.2768	3.98205	2.0513	1.94123				ENSMUSG00000022898	12	Dscr3	protein_coding	ensembl_havana	chr16:94497783-94526830:-
43.2694	-5.36368	1.89005	-2.83785				ENSMUSG00000016756	16	Cmah	protein_coding	ensembl_havana	chr13:24327420-24477285:+
43.2429	-5.78609	2.4954	-2.3187				ENSMUSG00000071014	10	Ndufb6	protein_coding	ensembl_havana	chr4:40270591-40279421:-
43.1911	-1.15428	1.70465	-0.677138	0.498318	0.721335	4.5	ENSMUSG00000022270	15	Fam134b	protein_coding	ensembl	chr15:25843264-25973687:+
43.169	-0.0637064	1.89118	-0.0336861	0.973127	0.875946	5.72755	ENSMUSG00000033228	7	Scaf11	protein_coding	ensembl	chr15:96411698-96460843:-
43.1524	0.480204	2.1065	0.227963	0.819675	0.908867	4.5	ENSMUSG00000019254	16	Ppp1r12c	protein_coding	ensembl_havana	chr7:4481520-4501680:-
43.0699	0.767396	1.71639	0.447098	0.654804	0.733797	5.72755	ENSMUSG00000057522	15	Spop	protein_coding	ensembl_havana	chr11:95414080-95493406:+
43.0637	5.34293	2.47079	2.16244				ENSMUSG00000063350	6	Olfr874	protein_coding	ensembl_havana	chr9:37745106-37748594:+
42.9755	2.82383	1.64106	1.72074	0.0852982	0.287322	4.5	ENSMUSG00000005514	14	Por	protein_coding	ensembl_havana	chr5:135670033-135735326:+
42.9619	2.45416	2.23595	1.09759	0.272383	0.488173	5.25398	ENSMUSG00000046791	7	2410016O06Rik	protein_coding	ensembl	chr12:83950608-83952953:+
42.9051	1.35674	1.65489	0.819834	0.412311	0.649	4.5	ENSMUSG00000036698	10	Ago2	protein_coding	ensembl_havana	chr15:73095844-73184840:-
42.8839	1.92227	1.62771	1.18096	0.237617	0.493641	4.5	ENSMUSG00000036257	14	Pnpla8	protein_coding	ensembl_havana	chr12:44221370-44312343:+
42.8708	3.77851	2.1086	1.79195				ENSMUSG00000032350	9	Gclc	protein_coding	ensembl_havana	chr9:77754535-77794485:+
42.8384	0.370687	1.76262	0.210305	0.83343	0.918488	4.5	ENSMUSG00000005621	11	Zfp592	protein_coding	ensembl_havana	chr7:80993681-81045164:+
42.8367	2.16185	1.88319	1.14797	0.250981	0.449151	5.72755	ENSMUSG00000030655	15	Smg1	protein_coding	ensembl_havana	chr7:118131308-118243670:-
42.8243	-2.79837	2.05112	-1.36431	0.17247	0.421093	4.5	ENSMUSG00000052934	14	Fbxo31	protein_coding	ensembl_havana	chr8:121549440-121578806:-
42.8069	-9.22935	2.59037	-3.56295				ENSMUSG00000041921	16	Metap1d	protein_coding	ensembl_havana	chr2:71453276-71525194:+
42.7646	-3.51252	2.75419	-1.27534				ENSMUSG00000072772	3	Grcc10	protein_coding	ensembl_havana	chr6:124739183-124741374:-
42.726	-1.735	2.07062	-0.837912				ENSMUSG00000048391	3	Olfr843	protein_coding	ensembl_havana	chr9:19242956-19251987:-
42.7117	5.62528	1.94707	2.8891	0.00386345	0.080195	4.5	ENSMUSG00000000594	7	Gm2a	protein_coding	ensembl_havana	chr11:55098115-55113029:+
42.6496	3.81602	2.07162	1.84204				ENSMUSG00000049164	6	Zfp518a	protein_coding	ensembl	chr19:40894705-40917947:+
42.5621	-3.65542	1.70509	-2.14383				ENSMUSG00000055805	14	Fmnl1	protein_coding	ensembl_havana	chr11:103171107-103198901:+
42.5553	3.56775	1.98112	1.80088	0.0717226	0.267003	4.5	ENSMUSG00000031007	2	Atp6ap2	protein_coding	ensembl_havana	chrX:12587801-12617049:+
42.5479	1.51434	1.84147	0.822356	0.410874	0.648668	4.5	ENSMUSG00000029050	15	Ski	protein_coding	ensembl_havana	chr4:155154075-155222592:-
42.5431	-5.23254	2.16409	-2.4179				ENSMUSG00000052396	7	Mogat2	protein_coding	ensembl_havana	chr7:99219084-99238619:-
42.5028	-0.860285	1.32962	-0.647015	0.517623	0.677041	5.25398	ENSMUSG00000000326	12	Comt	protein_coding	ensembl_havana	chr16:18406886-18426852:-
42.4738	-0.242039	2.13638	-0.113294	0.909798	0.885961	5.25398	ENSMUSG00000032621	8	Srek1	protein_coding	ensembl_havana	chr13:103739348-103774608:-
42.401	-7.95906	2.36491	-3.36548				ENSMUSG00000025779	10	Ly96	protein_coding	ensembl_havana	chr1:16688051-16709611:+
42.3811	-2.52044	1.94464	-1.29609	0.194944	0.44742	4.5	ENSMUSG00000056268	15	Dennd1b	protein_coding	ensembl_havana	chr1:138963435-139178960:+
42.351	-25.4378	2.73721	-9.29331				ENSMUSG00000044149	6	Nkrf	protein_coding	ensembl_havana	chrX:36887540-36902899:-
42.343	6.44167	2.33142	2.76299				ENSMUSG00000011752	6	Pgam1	protein_coding	ensembl	chr19:41911871-41918664:+
42.3349	-1.06893	1.64908	-0.648197	0.516858	0.734049	4.5	ENSMUSG00000037921	15	Ddx60	protein_coding	ensembl_havana	chr8:61928087-62038244:+
42.3218	4.80873	1.97838	2.43064				ENSMUSG00000054555	11	Adam12	protein_coding	ensembl_havana	chr7:133883199-134232146:-
42.28	5.20968	2.24046	2.32527				ENSMUSG00000022234	14	Cct5	protein_coding	ensembl_havana	chr15:31590800-31601847:-
42.2588	-3.10122	1.71311	-1.81028	0.0702523	0.266929	4.5	ENSMUSG00000031284	16	Pak3	protein_coding	ensembl_havana	chrX:143518591-143797796:+
42.2568	2.92545	2.15289	1.35885				ENSMUSG00000029397	15	Rchy1	protein_coding	ensembl_havana	chr5:91948904-91963068:-
42.2056	-5.62249	2.16688	-2.59474				ENSMUSG00000053399	9	Adamts18	protein_coding	ensembl_havana	chr8:113697126-113848738:-
42.1977	-4.2502	2.6051	-1.63149				ENSMUSG00000033096	7	Apmap	protein_coding	ensembl_havana	chr2:150583080-150608567:-
42.1859	0.0559237	2.01475	0.0277571	0.977856	1	4.5	ENSMUSG00000018379	17	Srsf1	protein_coding	ensembl_havana	chr11:88047373-88053755:+
42.163	-4.05069	2.50792	-1.61516				ENSMUSG00000051855	15	Mest	protein_coding	ensembl_havana	chr6:30723547-30748465:+
42.1277	-0.969364	1.96477	-0.493372	0.62175	0.71465	5.72755	ENSMUSG00000028821	8	Syf2	protein_coding	ensembl_havana	chr4:134930898-134937548:+
42.0801	-2.7154	1.94887	-1.39332	0.163523	0.378691	5.25398	ENSMUSG00000028234	6	Rps20	protein_coding	ensembl_havana	chr4:3831334-3835665:-
42.0244	1.09044	1.4882	0.732729	0.463724	0.693173	4.5	ENSMUSG00000019943	9	Atp2b1	protein_coding	ensembl	chr10:98915152-99026143:+
42.023	2.39857	1.99251	1.20379				ENSMUSG00000038128	6	Camk4	protein_coding	ensembl	chr18:32939041-33195767:+
42.0207	-0.830803	1.79276	-0.463423	0.643062	0.818697	4.5	ENSMUSG00000022565	15	Plec	protein_coding	ensembl_havana	chr15:76170974-76232574:-
41.9848	1.90457	1.79964	1.05831				ENSMUSG00000020542	18	Myocd	protein_coding	ensembl_havana	chr11:65176561-65269989:-
41.9291	-6.59593	2.07515	-3.17853				ENSMUSG00000030811	14	Fbxl19	protein_coding	ensembl_havana	chr7:127744543-127769483:+
41.9077	-3.33799	2.48139	-1.34521				ENSMUSG00000063145	10	Bbs5	protein_coding	ensembl_havana	chr2:69647171-69667571:+
41.8907	-4.96075	1.91397	-2.59186				ENSMUSG00000051627	2	Hist1h1e	protein_coding	ensembl_havana	chr13:23621755-23622502:-
41.8551	-7.54503	1.99731	-3.77759				ENSMUSG00000025993	10	Slc40a1	protein_coding	ensembl_havana	chr1:45908068-45926523:-
41.8316	-1.80859	1.82054	-0.993436	0.320498	0.575491	4.5	ENSMUSG00000047368	3	Abhd17b	protein_coding	ensembl	chr19:21653309-21685637:+
41.8125	-3.57897	2.19082	-1.63362				ENSMUSG00000030062	7	Rpn1	protein_coding	ensembl_havana	chr6:88084482-88105304:+
41.8012	4.64284	2.31938	2.00175				ENSMUSG00000041920	14	Slc16a6	protein_coding	ensembl_havana	chr11:109450855-109473598:-
41.7559	1.61181	2.06257	0.781457	0.434533	0.620248	5.25398	ENSMUSG00000040128	9	Pnrc1	protein_coding	ensembl_havana	chr4:33245423-33290163:-
41.7536	4.04837	2.24535	1.803				ENSMUSG00000032470	16	Mras	protein_coding	ensembl_havana	chr9:99385420-99437381:-
41.664	0.953662	1.6901	0.564263	0.572575	0.681751	5.72755	ENSMUSG00000026864	13	Hspa5	protein_coding	ensembl_havana	chr2:34771970-34777547:+
41.6591	3.30036	1.72863	1.90924	0.0562317	0.223775	5.72755	ENSMUSG00000021171	7	Esyt2	protein_coding	ensembl	chr12:116281222-116373096:+
41.522	-2.69702	2.31042	-1.16733				ENSMUSG00000073920	4	Olfr661	protein_coding	ensembl_havana	chr7:104686501-104691354:+
41.4799	-1.78027	2.55031	-0.698062				ENSMUSG00000090622	1	A930033H14Rik	protein_coding	havana	chr10:69209762-69213098:-
41.4124	0.590526	1.95055	0.302749				ENSMUSG00000018008	7	Cyth4	protein_coding	ensembl	chr15:78597047-78622019:+
41.3192	4.22578	2.44145	1.73085				ENSMUSG00000028383	17	Hsdl2	protein_coding	ensembl_havana	chr4:59581563-59618689:+
41.2395	1.8165	1.9315	0.940457	0.346983	0.598681	4.5	ENSMUSG00000007721	6	Ccdc124	protein_coding	ensembl_havana	chr8:70868227-70873935:-
41.23	-1.18874	2.05207	-0.579289				ENSMUSG00000021820	16	Camk2g	protein_coding	ensembl	chr14:20734875-20794088:-
41.2107	-3.97169	1.86097	-2.13421	0.0328257	0.198987	4.5	ENSMUSG00000041112	15	Elmo1	protein_coding	ensembl_havana	chr13:20090596-20606528:+
41.1949	-0.185361	2.10441	-0.0880821	0.929811	0.895073	5.25398	ENSMUSG00000024493	8	Lars	protein_coding	ensembl	chr18:42202350-42262122:-
41.1935	-5.58676	2.13461	-2.61723				ENSMUSG00000038528	14	Mfsd4b5	protein_coding	ensembl_havana	chr10:39958061-39986646:-
41.189	-2.38134	2.11216	-1.12744	0.259556	0.456171	5.72755	ENSMUSG00000022973	17	Synj1	protein_coding	ensembl_havana	chr16:90936092-91011308:-
41.1855	4.16311	1.88823	2.20477	0.0274701	0.186627	4.5	ENSMUSG00000026980	15	Ly75	protein_coding	ensembl_havana	chr2:60292103-60383303:-
41.15	-3.24655	2.12112	-1.53058	0.125873	0.325213	5.25398	ENSMUSG00000024165	8	Hn1l	protein_coding	ensembl	chr17:24942156-24960636:-
41.1405	3.5063	2.19659	1.59625				ENSMUSG00000025733	17	Rhot2	protein_coding	ensembl_havana	chr17:25838457-25844851:-
41.1375	7.09843	2.52356	2.81286				ENSMUSG00000061175	11	Fnip2	protein_coding	ensembl_havana	chr3:79455974-79567796:-
41.1352	-2.30906	1.86571	-1.23763	0.215853	0.437594	5.25398	ENSMUSG00000056394	17	Lig1	protein_coding	ensembl_havana	chr7:13277283-13311433:+
41.1313	-4.52579	1.99874	-2.26432	0.0235543	0.17522	4.5	ENSMUSG00000003308	15	Keap1	protein_coding	ensembl_havana	chr9:21229730-21239361:-
41.1267	-1.51387	1.98219	-0.763738	0.445024	0.678959	4.5	ENSMUSG00000030846	15	Tial1	protein_coding	ensembl_havana	chr7:128439777-128461717:-
41.1012	-25.3932	2.9616	-8.57416				ENSMUSG00000042800	5	1700015E13Rik	protein_coding	ensembl_havana	chr1:170308803-170312125:+
41.0703	-6.89424	1.89023	-3.6473	0.000265013	0.0529872	4.5	ENSMUSG00000020515	13	Cnot8	protein_coding	ensembl_havana	chr11:58104153-58118594:+
41.029	3.92956	2.05689	1.91044				ENSMUSG00000032727	13	Mier3	protein_coding	ensembl_havana	chr13:111686178-111718596:+
40.9117	0.914918	2.14143	0.427245	0.669201	0.737709	5.72755	ENSMUSG00000059890	16	Ube4a	protein_coding	ensembl_havana	chr9:44923127-44965600:-
40.9107	-5.88431	2.02118	-2.91133				ENSMUSG00000036112	15	Metap2	protein_coding	ensembl_havana	chr10:93858489-93897093:-
40.7787	0.892105	1.73189	0.515105	0.60648	0.796382	4.5	ENSMUSG00000052040	10	Klf13	protein_coding	ensembl_havana	chr7:63886351-63938915:-
40.7461	0.055141	1.73366	0.031806	0.974627	0.918488	5.25398	ENSMUSG00000060090	16	Rp2	protein_coding	ensembl_havana	chrX:20364481-20405653:+
40.7431	-0.672454	1.6359	-0.41106	0.681028	0.781116	5.25398	ENSMUSG00000038212	15	Mfsd14b	protein_coding	ensembl_havana	chr13:65064663-65112982:-
40.7115	1.70484	2.08241	0.818683	0.412967	0.578677	5.72755	ENSMUSG00000008333	12	Snrpb2	protein_coding	ensembl_havana	chr2:143063039-143072853:+
40.689	-2.76629	1.67858	-1.648	0.099353	0.287248	5.25398	ENSMUSG00000045210	8	Vcpip1	protein_coding	ensembl_havana	chr1:9718622-9748382:-
40.6775	5.26291	2.29159	2.29662	0.0216404	0.167249	4.5	ENSMUSG00000058558	12	Rpl5	protein_coding	ensembl_havana	chr5:107900502-107909005:+
40.6646	4.06295	1.88278	2.15795	0.0309314	0.194558	4.5	ENSMUSG00000025877	14	Hk3	protein_coding	ensembl_havana	chr13:55005985-55021385:-
40.6332	3.56127	2.0023	1.77858				ENSMUSG00000032504	15	Pdcd6ip	protein_coding	ensembl_havana	chr9:113651744-113708259:-
40.6192	1.24556	1.86701	0.66714	0.504683	0.72604	4.5	ENSMUSG00000044447	4	Dock5	protein_coding	ensembl	chr14:67751928-67933572:-
40.5772	0.11782	1.69506	0.0695078	0.944585	0.981054	4.5	ENSMUSG00000020431	5	Adcy1	protein_coding	ensembl_havana	chr11:7063489-7178506:+
40.5767	4.7946	2.14557	2.23465				ENSMUSG00000042423	9	Fbrs	protein_coding	ensembl_havana	chr7:127479199-127491711:+
40.4923	8.34796	2.57032	3.24783				ENSMUSG00000036334	12	Igsf10	protein_coding	ensembl_havana	chr3:59316735-59344394:-
40.4908	-3.15676	2.19478	-1.4383				ENSMUSG00000027968	11	Larp7	protein_coding	ensembl_havana	chr3:127536714-127553349:-
40.4814	-5.06167	1.7989	-2.81377				ENSMUSG00000002997	15	Prkar2b	protein_coding	ensembl_havana	chr12:31958476-32061296:-
40.4591	-3.23358	2.0029	-1.61445				ENSMUSG00000026589	14	Sec16b	protein_coding	ensembl_havana	chr1:157506728-157568425:+
40.3962	1.91473	1.75239	1.09264	0.274553	0.536679	4.5	ENSMUSG00000022672	8	Prkdc	protein_coding	ensembl_havana	chr16:15637866-15842235:+
40.3904	1.12232	2.44736	0.458583				ENSMUSG00000031897	9	Psmb10	protein_coding	ensembl_havana	chr8:105935735-105938444:-
40.3856	3.34232	2.07521	1.6106	0.107268	0.298703	5.25398	ENSMUSG00000022216	16	Psme1	protein_coding	ensembl_havana	chr14:55578123-55581529:+
40.2751	-4.54444	1.99105	-2.28243	0.0224639	0.158741	5.25398	ENSMUSG00000020747	17	Tmem94	protein_coding	ensembl_havana	chr11:115765433-115799366:+
40.238	0.525833	1.56568	0.33585	0.736984	0.861608	4.5	ENSMUSG00000055024	12	Ep300	protein_coding	ensembl_havana	chr15:81585351-81652077:+
40.2325	-0.91499	1.94751	-0.469826	0.638479	0.814961	4.5	ENSMUSG00000060591	9	Ifitm2	protein_coding	ensembl_havana	chr7:140954837-140955987:-
40.2201	-2.08251	2.15613	-0.965854				ENSMUSG00000036333	10	Kidins220	protein_coding	ensembl	chr12:24974932-25059697:+
40.2015	4.39129	2.05355	2.13838				ENSMUSG00000052372	10	Il1rapl1	protein_coding	ensembl_havana	chrX:86740870-88115645:-
40.1729	5.57333	2.32	2.4023				ENSMUSG00000021180	8	Rps6ka5	protein_coding	ensembl	chr12:100549778-100725028:-
40.1555	-7.80998	2.6444	-2.9534				ENSMUSG00000021715	12	Cwc27	protein_coding	ensembl_havana	chr13:104631140-104817142:-
40.0598	4.96707	2.15312	2.30692				ENSMUSG00000047284	14	Neurl4	protein_coding	ensembl_havana	chr11:69901072-69913820:+
40.0152	5.78313	2.07489	2.78719				ENSMUSG00000045665	4	Mfsd5	protein_coding	ensembl	chr15:102279456-102281744:+
39.9711	-2.67018	2.33724	-1.14245				ENSMUSG00000057455	12	Rit2	protein_coding	ensembl_havana	chr18:30973489-31317290:-
39.941	2.25349	2.05892	1.0945	0.273735	0.536396	4.5	ENSMUSG00000032218	7	Ccnb2	protein_coding	ensembl_havana	chr9:70407692-70421547:-
39.9174	-0.176969	1.80396	-0.0981002	0.921853	0.85578	5.72755	ENSMUSG00000035722	15	Abca7	protein_coding	ensembl_havana	chr10:79996494-80015572:+
39.8842	0.694927	1.76017	0.394806				ENSMUSG00000009575	14	Cbx5	protein_coding	ensembl_havana	chr15:103191544-103239816:-
39.8706	21.7899	3.16032	6.89484				ENSMUSG00000051839	7	Gypa	protein_coding	ensembl_havana	chr8:80493781-80510542:+
39.8546	1.05215	1.83642	0.572937	0.566688	0.76794	4.5	ENSMUSG00000022710	17	Usp7	protein_coding	ensembl_havana	chr16:8689595-8792308:-
39.8246	0.126282	2.07134	0.0609664				ENSMUSG00000015671	10	Psma2	protein_coding	ensembl	chr13:14613242-14625671:+
39.7957	-2.49351	1.52876	-1.63107	0.102876	0.290937	5.25398	ENSMUSG00000034109	15	Golim4	protein_coding	ensembl_havana	chr3:75875084-75956949:-
39.7886	1.98987	2.23474	0.890429				ENSMUSG00000079594	2	BC117090	protein_coding	ensembl	chr16:36321665-36334332:-
39.7732	0.993488	1.9916	0.49884	0.617892	0.803727	4.5	ENSMUSG00000024091	8	Vapa	protein_coding	ensembl	chr17:65580056-65613555:-
39.7618	1.90621	2.04319	0.932958				ENSMUSG00000073893	5	Olfr472	protein_coding	ensembl_havana	chr7:107897902-107907762:+
39.7514	1.96839	1.82675	1.07754	0.281239	0.497071	5.25398	ENSMUSG00000035898	13	Uba6	protein_coding	ensembl_havana	chr5:86109287-86172803:-
39.7179	3.16643	2.11372	1.49803				ENSMUSG00000000282	12	Mnt	protein_coding	ensembl_havana	chr11:74830920-74845725:+
39.7014	5.12637	2.15384	2.38011	0.0173073	0.136879	5.25398	ENSMUSG00000024498	15	Tcerg1	protein_coding	ensembl_havana	chr18:42511510-42575551:+
39.6421	-4.16577	1.96991	-2.1147				ENSMUSG00000032193	9	Ldlr	protein_coding	ensembl_havana	chr9:21723483-21749919:+
39.6305	3.51506	2.33808	1.5034	0.132736	0.332045	5.25398	ENSMUSG00000070972	13	Dnajc25	protein_coding	ensembl_havana	chr4:58995062-59025573:+
39.6301	-5.21615	1.89172	-2.75737	0.0058269	0.0821579	5.72755	ENSMUSG00000039607	15	Rbms3	protein_coding	ensembl_havana	chr9:116572746-117629913:-
39.6246	8.28859	2.46029	3.36895				ENSMUSG00000061898	10	Rbak	protein_coding	ensembl_havana	chr5:143172186-143180775:-
39.6213	5.93313	2.4154	2.45637				ENSMUSG00000037868	15	Egr2	protein_coding	ensembl_havana	chr10:67535475-67542188:+
39.5952	-2.67962	1.97532	-1.35655				ENSMUSG00000030067	17	Foxp1	protein_coding	ensembl_havana	chr6:98925338-99522721:-
39.5947	3.252	1.99927	1.6266				ENSMUSG00000034037	14	Fgd5	protein_coding	ensembl_havana	chr6:91978878-92076004:+
39.5879	1.56504	1.92471	0.813131	0.416143	0.651803	4.5	ENSMUSG00000063316	13	Rpl27	protein_coding	ensembl_havana	chr11:101442298-101445529:+
39.5753	-7.55289	2.46608	-3.06271				ENSMUSG00000004151	16	Etv1	protein_coding	ensembl_havana	chr12:38779380-38868215:+
39.5537	2.87176	1.72161	1.66807	0.0953017	0.305162	4.5	ENSMUSG00000000184	12	Ccnd2	protein_coding	ensembl_havana	chr6:127125162-127152193:-
39.5437	-1.10769	2.02249	-0.547687	0.583907	0.723396	5.25398	ENSMUSG00000031467	10	Agpat5	protein_coding	ensembl_havana	chr8:18846277-18891361:+
39.53	-3.94621	1.99787	-1.97521	0.0482446	0.230433	4.5	ENSMUSG00000036529	17	Sbf1	protein_coding	ensembl_havana	chr15:89288236-89315311:-
39.521	5.75441	2.42504	2.37292				ENSMUSG00000001065	15	Zfp276	protein_coding	ensembl_havana	chr8:123254195-123269745:+
39.5165	-1.73998	1.98001	-0.87877				ENSMUSG00000037111	9	Setd7	protein_coding	ensembl_havana	chr3:51515319-51560879:-
39.4782	-0.820192	1.51297	-0.542108	0.587744	0.78395	4.5	ENSMUSG00000039361	11	Picalm	protein_coding	ensembl_havana	chr7:90130213-90213465:+
39.4668	5.37376	2.37325	2.2643				ENSMUSG00000030177	14	Ccdc77	protein_coding	ensembl_havana	chr6:120324323-120364374:-
39.4496	-5.03596	2.45019	-2.05533				ENSMUSG00000026179	14	Pnkd	protein_coding	ensembl_havana	chr1:74284930-74353694:+
39.4232	6.59031	2.13528	3.08639	0.00202601	0.0733632	4.5	ENSMUSG00000038181	16	Chpf2	protein_coding	ensembl_havana	chr5:24586741-24594556:+
39.4198	-0.336327	2.32091	-0.144912				ENSMUSG00000030774	13	Pak1	protein_coding	ensembl_havana	chr7:97788541-97912381:+
39.4028	0.569796	2.27617	0.25033				ENSMUSG00000047554	14	Tmem41b	protein_coding	ensembl_havana	chr7:109972187-109986929:-
39.3898	-4.16195	1.95875	-2.1248	0.0336034	0.200262	4.5	ENSMUSG00000065954	11	Tacc1	protein_coding	ensembl_havana	chr8:25154552-25256588:-
39.3865	-2.06956	2.05754	-1.00584	0.314491	0.570107	4.5	ENSMUSG00000032580	12	Rbm5	protein_coding	ensembl_havana	chr9:107740371-107770996:-
39.3552	-4.92489	2.30644	-2.13528				ENSMUSG00000034488	14	Edil3	protein_coding	ensembl_havana	chr13:88821472-89323223:+
39.34	3.55456	2.33567	1.52186				ENSMUSG00000015401	12	Tmem27	protein_coding	ensembl_havana	chrX:164088830-164118860:+
39.3231	-6.48115	2.43599	-2.66058				ENSMUSG00000022718	11	Dgcr8	protein_coding	ensembl_havana	chr16:18253948-18289249:-
39.2645	5.21966	2.49345	2.09335				ENSMUSG00000033737	14	Fndc3c1	protein_coding	ensembl_havana	chrX:106420041-106485401:-
39.2366	3.83079	1.9474	1.96713				ENSMUSG00000054942	13	Miga1	protein_coding	ensembl_havana	chr3:152273849-152340407:-
39.2363	-8.53963	2.32599	-3.6714				ENSMUSG00000029462	18	Vps29	protein_coding	ensembl_havana	chr5:122354369-122364984:+
39.2254	5.94057	2.47929	2.39608				ENSMUSG00000060583	4	Olfr881	protein_coding	ensembl_havana	chr9:37991825-37996408:+
39.1588	-6.68121	2.24331	-2.97828				ENSMUSG00000038943	16	Prc1	protein_coding	ensembl_havana	chr7:80294450-80316259:+
39.1314	-7.52772	2.14928	-3.50243				ENSMUSG00000003206	6	Ebi3	protein_coding	ensembl	chr17:55952623-55957021:+
39.1046	3.21971	2.29034	1.40578				ENSMUSG00000019877	10	Serinc1	protein_coding	ensembl_havana	chr10:57515774-57532530:-
39.0087	-1.91321	1.87934	-1.01802	0.308668	0.564734	4.5	ENSMUSG00000034673	14	Pbx2	protein_coding	ensembl_havana	chr17:34591266-34597400:+
38.9299	-0.198466	2.35093	-0.0844202				ENSMUSG00000035762	10	Tmem161b	protein_coding	ensembl_havana	chr13:84222314-84295870:+
38.9139	-4.91873	1.90558	-2.58123	0.00984485	0.105448	5.25398	ENSMUSG00000056260	15	Lrif1	protein_coding	ensembl_havana	chr3:106684987-106736577:+
38.8864	0.815405	1.71376	0.4758				ENSMUSG00000034460	9	Six4	protein_coding	ensembl_havana	chr12:73099609-73113456:-
38.8776	6.12144	2.27392	2.69202				ENSMUSG00000058756	13	Thra	protein_coding	ensembl_havana	chr11:98740638-98769006:+
38.8641	3.12988	2.4737	1.26526				ENSMUSG00000027353	14	Mcm8	protein_coding	ensembl_havana	chr2:132816141-132844197:+
38.7875	3.0012	2.15021	1.39577				ENSMUSG00000026083	12	Eif5b	protein_coding	ensembl_havana	chr1:37998010-38055579:+
38.7823	-5.23229	1.99646	-2.62078	0.00877294	0.101917	5.25398	ENSMUSG00000028678	13	Kif2c	protein_coding	ensembl_havana	chr4:117159639-117182639:-
38.7551	-4.22911	2.49774	-1.69317	0.0904222	0.267003	5.72755	ENSMUSG00000027091	14	Zc3h15	protein_coding	ensembl_havana	chr2:83644435-83664622:+
38.7446	-0.187953	2.2473	-0.083635	0.933347	0.975078	4.5	ENSMUSG00000047824	13	Pygo2	protein_coding	ensembl_havana	chr3:89430214-89435128:+
38.698	3.06845	2.56906	1.19439				ENSMUSG00000049493	13	Pls1	protein_coding	ensembl_havana	chr9:95752642-95845311:-
38.6237	-0.295852	1.6994	-0.174092	0.861793	0.861667	5.25398	ENSMUSG00000051495	7	Irf2bp2	protein_coding	ensembl_havana	chr8:126588296-126593986:-
38.5725	-6.44006	2.46151	-2.61631				ENSMUSG00000055817	17	Mta3	protein_coding	ensembl_havana	chr17:83706163-83821516:+
38.5637	3.95205	2.57773	1.53315				ENSMUSG00000028460	6	Sit1	protein_coding	ensembl_havana	chr4:43482081-43483734:-
38.5326	4.86092	2.29661	2.11657				ENSMUSG00000034187	18	Nsf	protein_coding	ensembl_havana	chr11:103821782-103954056:-
38.4869	2.00003	1.7174	1.16457				ENSMUSG00000075415	13	Fnbp1	protein_coding	ensembl_havana	chr2:31026206-31142008:-
38.4818	8.27899	2.57384	3.21659				ENSMUSG00000027901	12	Dennd2d	protein_coding	ensembl_havana	chr3:106482405-106503030:+
38.4809	-1.12492	1.53044	-0.735031	0.462321	0.692379	4.5	ENSMUSG00000063077	14	Kif1b	protein_coding	ensembl_havana	chr4:149176319-149307693:-
38.4491	6.11133	2.31458	2.64037	0.00828162	0.104389	4.5	ENSMUSG00000038080	16	Kdm1b	protein_coding	ensembl_havana	chr13:47043499-47084613:+
38.4421	5.42931	2.33411	2.32607				ENSMUSG00000028243	5	Ubxn2b	protein_coding	ensembl_havana	chr4:6191098-6221688:+
38.4338	-5.70571	2.07807	-2.74568				ENSMUSG00000009394	13	Syn2	protein_coding	ensembl_havana	chr6:115134902-115282006:+
38.3856	-4.2195	1.7035	-2.47695	0.0132509	0.131534	4.5	ENSMUSG00000027367	16	Stard7	protein_coding	ensembl_havana	chr2:127270218-127298932:+
38.2476	5.1608	2.0318	2.54002	0.0110847	0.122322	4.5	ENSMUSG00000036948	17	BC037034	protein_coding	ensembl_havana	chr5:138259656-138264033:-
38.2144	0.495976	1.60075	0.309841				ENSMUSG00000022914	15	Brwd1	protein_coding	ensembl_havana	chr16:95992092-96082526:-
38.1958	5.72784	2.21644	2.58425				ENSMUSG00000033955	12	Tnks1bp1	protein_coding	ensembl_havana	chr2:85048022-85073048:+
38.1803	-2.52486	2.20302	-1.14609				ENSMUSG00000025979	13	Mob4	protein_coding	ensembl_havana	chr1:55131231-55154899:+
38.151	1.66093	1.72555	0.962548	0.335775	0.587318	4.5	ENSMUSG00000047714	14	Ppp1r2	protein_coding	ensembl_havana	chr16:31251537-31275277:-
38.1355	2.13231	1.9001	1.12221	0.261774	0.478184	5.25398	ENSMUSG00000002129	11	Sf3a1	protein_coding	ensembl_havana	chr11:4160350-4182541:+
38.0898	2.40332	1.89002	1.27158	0.203522	0.455585	4.5	ENSMUSG00000048874	15	Phf3	protein_coding	ensembl_havana	chr1:30802339-30873921:-
38.0659	8.25194	2.54432	3.24328				ENSMUSG00000033214	9	Slitrk5	protein_coding	ensembl	chr14:111675115-111683134:+
38.0619	-4.31073	1.80081	-2.39378	0.016676	0.134227	5.25398	ENSMUSG00000027546	15	Atp9a	protein_coding	ensembl_havana	chr2:168634438-168742409:-
38.0412	-6.00088	2.22849	-2.6928				ENSMUSG00000039108	14	Lsm14b	protein_coding	ensembl_havana	chr2:180024987-180035465:+
38.0289	5.87988	2.6029	2.25897	0.0238851	0.175326	4.5	ENSMUSG00000012405	15	Rpl15	protein_coding	ensembl_havana	chr14:18267823-18271391:-
38.0262	1.89121	1.81178	1.04384	0.296559	0.51521	5.25398	ENSMUSG00000034218	15	Atm	protein_coding	ensembl_havana	chr9:53439149-53536740:-
37.9393	4.5002	2.43725	1.84643				ENSMUSG00000044172	6	Ptx4	protein_coding	ensembl	chr17:25120760-25125268:+
37.9249	3.21267	2.42994	1.32212				ENSMUSG00000060988	12	Galnt13	protein_coding	ensembl_havana	chr2:54436317-55118309:+
37.8923	2.95287	2.36721	1.24741				ENSMUSG00000021936	13	Mapk8	protein_coding	ensembl_havana	chr14:33377898-33447158:-
37.8691	-0.46512	1.58797	-0.292902	0.769597	0.878714	4.5	ENSMUSG00000023927	15	Satb1	protein_coding	ensembl_havana	chr17:51736187-51833290:-
37.8624	-2.82289	1.7909	-1.57624	0.11497	0.295801	5.72755	ENSMUSG00000020532	18	Acaca	protein_coding	ensembl_havana	chr11:84129672-84401651:+
37.8154	2.92006	1.99941	1.46046				ENSMUSG00000031823	14	Zdhhc7	protein_coding	ensembl_havana	chr8:120080890-120101482:-
37.7925	-2.88363	1.96557	-1.46707				ENSMUSG00000031389	17	Arhgap4	protein_coding	ensembl_havana	chrX:73891442-73921870:-
37.7762	-7.05225	2.4536	-2.87424				ENSMUSG00000002205	16	Vrk3	protein_coding	ensembl_havana	chr7:44748413-44777515:+
37.761	4.09517	2.26964	1.80433				ENSMUSG00000061311	6	Rag1	protein_coding	ensembl_havana	chr2:101638282-101649501:-
37.7445	-5.45993	2.0855	-2.61804	0.00884367	0.101917	5.25398	ENSMUSG00000013878	18	Rnf170	protein_coding	ensembl_havana	chr8:26119368-26151790:+
37.7159	-1.61841	1.77232	-0.913155	0.361161	0.611192	4.5	ENSMUSG00000031540	13	Kat6a	protein_coding	ensembl_havana	chr8:22859535-22943259:+
37.691	4.22754	2.26564	1.86594				ENSMUSG00000050199	13	Lgr4	protein_coding	ensembl_havana	chr2:109917647-110014257:+
37.6768	3.62219	2.09331	1.73037				ENSMUSG00000020900	15	Myh10	protein_coding	ensembl_havana	chr11:68691559-68816632:+
37.6611	4.71872	1.89677	2.48776	0.0128549	0.122322	5.25398	ENSMUSG00000029108	14	Pcdh7	protein_coding	ensembl_havana	chr5:57717967-58133230:+
37.6559	-4.47869	2.09681	-2.13595	0.0326834	0.187988	5.25398	ENSMUSG00000040459	11	Arglu1	protein_coding	ensembl_havana	chr8:8665075-8690521:-
37.6471	0.0797962	1.88255	0.0423872	0.96619	0.873181	5.72755	ENSMUSG00000030659	14	Nucb2	protein_coding	ensembl_havana	chr7:116504369-116540584:+
[truncated: 15,710 more rows]
